# Supplementary material for: SREBP1 activation contributes to fatty acid accumulations in necroptosis
Source: bioRxiv preprint, doi:10.1101/2022.08.22.504843, version 1 (2022-08-22)
Supplement: Supplemental Table 1 [file 504843_file03.xlsx]

## Sheet: raw read depths
genes	C1LP	C2LP	C3LP	N1LP	N2LP	N3LP	hgnc_symbol	description	N_log2FoldChange	N_pvalue	N_padj
ENSG00000090339	75	81	92	11906	10869	11355	ICAM1	intercellular adhesion molecule 1 [Source:HGNC Symbol;Acc:5344]	7.12597	0	0
ENSG00000100311	351	343	377	5975	5774	6265	PDGFB	platelet-derived growth factor beta polypeptide [Source:HGNC Symbol;Acc:8800]	4.09255	0	0
ENSG00000100906	778	794	737	17570	17541	18463	NFKBIA	nuclear factor of kappa light polypeptide gene enhancer in B-cells inhibitor, alpha [Source:HGNC Symbol;Acc:7797]	4.54479	0	0
ENSG00000106366	58	42	49	2387	2356	2479	SERPINE1	serpin peptidase inhibitor, clade E (nexin, plasminogen activator inhibitor type 1), member 1 [Source:HGNC Symbol;Acc:8583]	5.582	0	0
ENSG00000111859	397	412	444	4762	4475	4542	NEDD9	neural precursor cell expressed, developmentally down-regulated 9 [Source:HGNC Symbol;Acc:7733]	3.46912	0	0
ENSG00000113070	282	277	320	5652	5377	5661	HBEGF	heparin-binding EGF-like growth factor [Source:HGNC Symbol;Acc:3059]	4.25914	0	0
ENSG00000124145	3834	3976	4005	41674	39539	39280	SDC4	syndecan 4 [Source:HGNC Symbol;Acc:10661]	3.34918	0	0
ENSG00000124762	347	366	361	7567	7243	7430	CDKN1A	cyclin-dependent kinase inhibitor 1A (p21, Cip1) [Source:HGNC Symbol;Acc:1784]	4.38694	0	0
ENSG00000138166	374	398	374	6033	5847	5802	DUSP5	dual specificity phosphatase 5 [Source:HGNC Symbol;Acc:3071]	3.94241	0	0
ENSG00000138623	38	57	34	3070	3123	3357	SEMA7A	semaphorin 7A, GPI membrane anchor (John Milton Hagen blood group) [Source:HGNC Symbol;Acc:10741]	6.23984	0	0
ENSG00000144655	299	330	332	4172	4296	4436	CSRNP1	cysteine-serine-rich nuclear protein 1 [Source:HGNC Symbol;Acc:14300]	3.75569	0	0
ENSG00000159388	305	299	281	2355	2173	2137	BTG2	BTG family, member 2 [Source:HGNC Symbol;Acc:1131]	2.92902	0	0
ENSG00000162772	148	177	159	9400	9323	8916	ATF3	activating transcription factor 3 [Source:HGNC Symbol;Acc:785]	5.85038	0	0
ENSG00000169429	629	653	739	114720	110945	102501	IL8	interleukin 8 [Source:HGNC Symbol;Acc:6025]	7.26406	0	0
ENSG00000173334	4072	4045	3952	21077	21202	21006	TRIB1	tribbles pseudokinase 1 [Source:HGNC Symbol;Acc:16891]	2.38344	0	0
ENSG00000179674	193	190	208	4947	4327	4500	ARL14	ADP-ribosylation factor-like 14 [Source:HGNC Symbol;Acc:22974]	4.56653	0	0
ENSG00000163739	49	57	43	4188	4162	4116	CXCL1	chemokine (C-X-C motif) ligand 1 (melanoma growth stimulating activity, alpha) [Source:HGNC Symbol;Acc:4602]	6.35679	1.7e-307	1.89e-304
ENSG00000128342	701	736	835	11471	11278	11655	LIF	leukemia inhibitory factor [Source:HGNC Symbol;Acc:6596]	3.95003	2.39e-304	2.52e-301
ENSG00000077150	295	372	307	4550	4449	4900	NFKB2	nuclear factor of kappa light polypeptide gene enhancer in B-cells 2 (p49/p100) [Source:HGNC Symbol;Acc:7795]	3.87566	1.22e-297	1.22e-294
ENSG00000125347	943	973	920	5612	5512	5650	IRF1	interferon regulatory factor 1 [Source:HGNC Symbol;Acc:6116]	2.5882	1.09e-289	1.03e-286
ENSG00000134107	52	50	53	1818	1836	2044	BHLHE40	basic helix-loop-helix family, member e40 [Source:HGNC Symbol;Acc:1046]	5.24436	1.43e-280	1.29e-277
ENSG00000175505	231	213	235	2568	2550	2873	CLCF1	cardiotrophin-like cytokine factor 1 [Source:HGNC Symbol;Acc:17412]	3.57571	1.93e-277	1.66e-274
ENSG00000122861	40	40	42	2427	2327	2654	PLAU	plasminogen activator, urokinase [Source:HGNC Symbol;Acc:9052]	5.92999	1.47e-274	1.21e-271
ENSG00000067082	1690	1804	1920	12804	11664	11712	KLF6	Kruppel-like factor 6 [Source:HGNC Symbol;Acc:2235]	2.7227	1.52e-270	1.2e-267
ENSG00000159200	168	214	196	2397	2273	2124	RCAN1	regulator of calcineurin 1 [Source:HGNC Symbol;Acc:3040]	3.54116	1.95e-264	1.48e-261
ENSG00000175592	206	214	203	2398	2377	2800	FOSL1	FOS-like antigen 1 [Source:HGNC Symbol;Acc:13718]	3.63356	1.06e-262	7.72e-260
ENSG00000134070	356	388	421	2582	2557	2481	IRAK2	interleukin-1 receptor-associated kinase 2 [Source:HGNC Symbol;Acc:6113]	2.73239	1.53e-239	1.07e-236
ENSG00000134531	1406	1346	1424	5336	4966	5373	EMP1	epithelial membrane protein 1 [Source:HGNC Symbol;Acc:3333]	1.91406	6.91e-225	4.67e-222
ENSG00000185215	1038	1200	1311	15060	13689	14172	TNFAIP2	tumor necrosis factor, alpha-induced protein 2 [Source:HGNC Symbol;Acc:11895]	3.63533	2.14e-214	1.4e-211
ENSG00000011422	1024	1065	1026	7785	8195	8206	PLAUR	plasminogen activator, urokinase receptor [Source:HGNC Symbol;Acc:9053]	2.96164	1.77e-210	1.08e-207
ENSG00000120889	1496	1593	1609	7581	7158	7373	TNFRSF10B	tumor necrosis factor receptor superfamily, member 10b [Source:HGNC Symbol;Acc:11905]	2.23829	1.71e-210	1.08e-207
ENSG00000086544	542	544	576	7388	7059	7900	ITPKC	inositol-trisphosphate 3-kinase C [Source:HGNC Symbol;Acc:14897]	3.75655	3.18e-209	1.88e-206
ENSG00000075426	1253	1373	1287	4689	4558	4584	FOSL2	FOS-like antigen 2 [Source:HGNC Symbol;Acc:3798]	1.84763	9.64e-205	5.53e-202
ENSG00000155090	1680	1695	1863	6113	6496	6433	KLF10	Kruppel-like factor 10 [Source:HGNC Symbol;Acc:11810]	1.87003	2.48e-204	1.38e-201
ENSG00000164949	14	18	14	2795	2397	2459	GEM	GTP binding protein overexpressed in skeletal muscle [Source:HGNC Symbol;Acc:4234]	7.40139	2.05e-202	1.11e-199
ENSG00000138131	2183	2246	2217	8211	7892	8612	LOXL4	lysyl oxidase-like 4 [Source:HGNC Symbol;Acc:17171]	1.92126	1.42e-198	7.5e-196
ENSG00000116717	264	315	284	1637	1637	1714	GADD45A	growth arrest and DNA-damage-inducible, alpha [Source:HGNC Symbol;Acc:4095]	2.54077	9.02e-194	4.62e-191
ENSG00000262795	357	340	350	1615	1538	1548	IFNGR2	interferon gamma receptor 2 (interferon gamma transducer 1) [Source:HGNC Symbol;Acc:5440]	2.16947	3.87e-190	1.93e-187
ENSG00000159128	357	340	350	1614	1538	1547	IFNGR2	interferon gamma receptor 2 (interferon gamma transducer 1) [Source:HGNC Symbol;Acc:5440]	2.16876	4.27e-190	2.07e-187
ENSG00000118503	11	31	27	5261	4510	5054	TNFAIP3	tumor necrosis factor, alpha-induced protein 3 [Source:HGNC Symbol;Acc:11896]	7.78184	6.12e-184	2.9e-181
ENSG00000008513	7471	7443	7312	18608	18643	19189	ST3GAL1	ST3 beta-galactoside alpha-2,3-sialyltransferase 1 [Source:HGNC Symbol;Acc:10862]	1.36268	1.39e-181	6.45e-179
ENSG00000123358	157	179	206	4581	4367	4433	NR4A1	nuclear receptor subfamily 4, group A, member 1 [Source:HGNC Symbol;Acc:7980]	4.67649	5.03e-180	2.27e-177
ENSG00000137801	2905	3046	2897	8055	7463	7764	THBS1	thrombospondin 1 [Source:HGNC Symbol;Acc:11785]	1.41352	7.2e-178	3.17e-175
ENSG00000134954	344	351	332	3297	2968	3330	ETS1	v-ets avian erythroblastosis virus E26 oncogene homolog 1 [Source:HGNC Symbol;Acc:3488]	3.24326	5.02e-176	2.16e-173
ENSG00000116285	3220	3352	3594	18417	17087	16351	ERRFI1	ERBB receptor feedback inhibitor 1 [Source:HGNC Symbol;Acc:18185]	2.33751	8.2e-173	3.45e-170
ENSG00000112096	1784	1893	1808	13502	11640	10630	SOD2	superoxide dismutase 2, mitochondrial [Source:HGNC Symbol;Acc:11180]	2.69209	7.15e-167	2.95e-164
ENSG00000146232	180	199	203	1620	1677	1722	NFKBIE	nuclear factor of kappa light polypeptide gene enhancer in B-cells inhibitor, epsilon [Source:HGNC Symbol;Acc:7799]	3.11341	2.06e-156	8.29e-154
ENSG00000087074	1428	1453	1536	13869	13726	14662	PPP1R15A	protein phosphatase 1, regulatory subunit 15A [Source:HGNC Symbol;Acc:14375]	3.32341	1.07e-141	4.22e-139
ENSG00000053747	866	827	830	3826	3241	3639	LAMA3	laminin, alpha 3 [Source:HGNC Symbol;Acc:6483]	2.13364	3.47e-141	1.34e-138
ENSG00000023445	236	260	307	13216	11841	11844	BIRC3	baculoviral IAP repeat containing 3 [Source:HGNC Symbol;Acc:591]	5.46509	1.35e-140	5.1e-138
ENSG00000114529	347	323	350	1955	1740	1913	C3orf52	chromosome 3 open reading frame 52 [Source:HGNC Symbol;Acc:26255]	2.45443	2.93e-134	1.09e-131
ENSG00000164400	6	11	9	2436	2442	2679	CSF2	colony stimulating factor 2 (granulocyte-macrophage) [Source:HGNC Symbol;Acc:2434]	8.24975	3.1e-132	1.13e-129
ENSG00000185022	507	547	585	3393	3426	3373	MAFF	v-maf avian musculoaponeurotic fibrosarcoma oncogene homolog F [Source:HGNC Symbol;Acc:6780]	2.6532	9.1e-129	3.25e-126
ENSG00000169908	6620	6525	6476	17722	18172	18498	TM4SF1	transmembrane 4 L six family member 1 [Source:HGNC Symbol;Acc:11853]	1.4568	1.2e-125	4.22e-123
ENSG00000163734	13	11	14	1428	1351	1348	CXCL3	chemokine (C-X-C motif) ligand 3 [Source:HGNC Symbol;Acc:4604]	6.80599	9.76e-123	3.36e-120
ENSG00000115009	6	6	4	2734	2562	2358	CCL20	chemokine (C-C motif) ligand 20 [Source:HGNC Symbol;Acc:10619]	8.88408	3.84e-112	1.3e-109
ENSG00000081041	8	11	6	1491	1387	1362	CXCL2	chemokine (C-X-C motif) ligand 2 [Source:HGNC Symbol;Acc:4603]	7.39914	1.18e-110	3.93e-108
ENSG00000112149	63	86	63	824	823	756	CD83	CD83 molecule [Source:HGNC Symbol;Acc:1703]	3.49852	2.53e-104	8.26e-102
ENSG00000151014	270	293	332	1347	1486	1309	CCRN4L	CCR4 carbon catabolite repression 4-like (S. cerevisiae) [Source:HGNC Symbol;Acc:14254]	2.18882	4.75e-104	1.52e-101
ENSG00000003402	936	923	982	2524	2337	2485	CFLAR	CASP8 and FADD-like apoptosis regulator [Source:HGNC Symbol;Acc:1876]	1.38753	1.17e-103	3.65e-101
ENSG00000184371	11	13	10	1011	796	911	CSF1	colony stimulating factor 1 (macrophage) [Source:HGNC Symbol;Acc:2432]	6.38558	1.17e-103	3.65e-101
ENSG00000109320	2119	1988	1980	5961	5452	5602	NFKB1	nuclear factor of kappa light polypeptide gene enhancer in B-cells 1 [Source:HGNC Symbol;Acc:7794]	1.49627	2.56e-102	7.83e-100
ENSG00000196878	2784	3062	3058	10486	10297	11545	LAMB3	laminin, beta 3 [Source:HGNC Symbol;Acc:6490]	1.87895	7.15e-102	2.15e-99
ENSG00000227231	627	644	701	4541	4738	4894	IER3	immediate early response 3 [Source:HGNC Symbol;Acc:5392]	2.85897	1.05e-99	2.97e-97
ENSG00000230128	627	644	701	4541	4738	4894	IER3	immediate early response 3 [Source:HGNC Symbol;Acc:5392]	2.85897	1.05e-99	2.97e-97
ENSG00000235030	627	644	701	4541	4738	4894	IER3	immediate early response 3 [Source:HGNC Symbol;Acc:5392]	2.85897	1.05e-99	2.97e-97
ENSG00000237155	627	644	701	4541	4738	4894	IER3	immediate early response 3 [Source:HGNC Symbol;Acc:5392]	2.85897	1.05e-99	2.97e-97
ENSG00000130164	2901	3060	3217	14072	13781	14447	LDLR	low density lipoprotein receptor [Source:HGNC Symbol;Acc:6547]	2.23998	3.64e-99	1.01e-96
ENSG00000172818	579	638	585	2136	2331	2278	OVOL1	ovo-like zinc finger 1 [Source:HGNC Symbol;Acc:8525]	1.91548	1.42e-97	3.91e-95
ENSG00000142627	5940	6659	6895	27848	28095	29280	EPHA2	EPH receptor A2 [Source:HGNC Symbol;Acc:3386]	2.15496	2.27e-97	6.14e-95
ENSG00000058085	522	574	446	2893	2729	3073	LAMC2	laminin, gamma 2 [Source:HGNC Symbol;Acc:6493]	2.53311	1.74e-93	4.64e-91
ENSG00000131016	3907	3616	3054	13692	12850	13838	AKAP12	A kinase (PRKA) anchor protein 12 [Source:HGNC Symbol;Acc:370]	1.94817	3.82e-93	1.01e-90
ENSG00000101670	2365	2212	2374	5568	5376	5241	LIPG	lipase, endothelial [Source:HGNC Symbol;Acc:6623]	1.21639	9.63e-92	2.5e-89
ENSG00000158470	2709	2628	2503	6220	6075	6218	B4GALT5	UDP-Gal:betaGlcNAc beta 1,4- galactosyltransferase, polypeptide 5 [Source:HGNC Symbol;Acc:928]	1.25047	1.28e-91	3.28e-89
ENSG00000148339	968	987	1052	3366	3536	3308	SLC25A25	solute carrier family 25 (mitochondrial carrier; phosphate carrier), member 25 [Source:HGNC Symbol;Acc:20663]	1.7703	2.46e-90	6.21e-88
ENSG00000073756	1344	1271	1427	5697	5259	5020	PTGS2	prostaglandin-endoperoxide synthase 2 (prostaglandin G/H synthase and cyclooxygenase) [Source:HGNC Symbol;Acc:9605]	1.97484	7.83e-90	1.95e-87
ENSG00000101384	664	693	748	2112	2028	2072	JAG1	jagged 1 [Source:HGNC Symbol;Acc:6188]	1.56109	1.79e-87	4.41e-85
ENSG00000171431	3291	3061	3357	7549	7631	7496	KRT20	keratin 20 [Source:HGNC Symbol;Acc:20412]	1.20845	5.84e-86	1.4e-83
ENSG00000263057	3291	3061	3357	7549	7631	7496	KRT20	keratin 20 [Source:HGNC Symbol;Acc:20412]	1.20845	5.84e-86	1.4e-83
ENSG00000132510	27	41	50	779	616	750	KDM6B	lysine (K)-specific demethylase 6B [Source:HGNC Symbol;Acc:29012]	4.26447	1e-85	2.37e-83
ENSG00000172602	27	18	14	542	488	514	RND1	Rho family GTPase 1 [Source:HGNC Symbol;Acc:18314]	4.76625	3.19e-85	7.46e-83
ENSG00000131669	175	215	175	1185	1235	1334	NINJ1	ninjurin 1 [Source:HGNC Symbol;Acc:7824]	2.76254	1.87e-84	4.33e-82
ENSG00000166949	3604	3652	3568	7547	7008	7420	SMAD3	SMAD family member 3 [Source:HGNC Symbol;Acc:6769]	1.02671	4.92e-84	1.12e-81
ENSG00000163874	301	319	225	2099	1972	2156	ZC3H12A	zinc finger CCCH-type containing 12A [Source:HGNC Symbol;Acc:26259]	2.89845	1.02e-82	2.29e-80
ENSG00000163545	30	37	37	417	419	395	NUAK2	NUAK family, SNF1-like kinase, 2 [Source:HGNC Symbol;Acc:29558]	3.5773	9.99e-82	2.23e-79
ENSG00000163082	493	505	489	1986	1843	1816	SGPP2	sphingosine-1-phosphate phosphatase 2 [Source:HGNC Symbol;Acc:19953]	1.92002	6.17e-81	1.36e-78
ENSG00000168646	1056	1199	1066	208	238	248	AXIN2	axin 2 [Source:HGNC Symbol;Acc:904]	-2.26406	5.37e-80	1.17e-77
ENSG00000184557	5	4	4	990	1080	1091	SOCS3	suppressor of cytokine signaling 3 [Source:HGNC Symbol;Acc:19391]	7.92829	5.46e-80	1.18e-77
ENSG00000156804	283	261	275	924	861	904	FBXO32	F-box protein 32 [Source:HGNC Symbol;Acc:16731]	1.72018	3.59e-79	7.64e-77
ENSG00000128567	4394	4604	4323	10077	9571	10530	PODXL	podocalyxin-like [Source:HGNC Symbol;Acc:9171]	1.19984	3.68e-76	7.74e-74
ENSG00000117525	159	147	150	646	591	577	F3	coagulation factor III (thromboplastin, tissue factor) [Source:HGNC Symbol;Acc:3541]	2.00106	3.07e-75	6.4e-73
ENSG00000221926	1005	921	962	2438	2530	2729	TRIM16	tripartite motif containing 16 [Source:HGNC Symbol;Acc:17241]	1.43363	4.81e-75	9.9e-73
ENSG00000145632	5751	5599	5392	9526	9538	9370	PLK2	polo-like kinase 2 [Source:HGNC Symbol;Acc:19699]	0.739568	1.02e-74	2.08e-72
ENSG00000222009	52	57	44	393	297	381	BTBD19	BTB (POZ) domain containing 19 [Source:HGNC Symbol;Acc:27145]	2.87113	2.34e-73	4.72e-71
ENSG00000104856	326	444	427	2810	2926	2980	RELB	v-rel avian reticuloendotheliosis viral oncogene homolog B [Source:HGNC Symbol;Acc:9956]	2.90232	9.73e-73	1.94e-70
ENSG00000112715	724	714	696	2063	1920	2044	VEGFA	vascular endothelial growth factor A [Source:HGNC Symbol;Acc:12680]	1.52967	2.54e-72	5.02e-70
ENSG00000133639	416	451	446	1910	1706	1683	BTG1	B-cell translocation gene 1, anti-proliferative [Source:HGNC Symbol;Acc:1130]	1.9719	2.1e-71	4.1e-69
ENSG00000115641	1003	1001	1065	2186	2177	2250	FHL2	four and a half LIM domains 2 [Source:HGNC Symbol;Acc:3703]	1.08957	2.36e-71	4.57e-69
ENSG00000128016	600	735	741	3618	3892	3953	ZFP36	ZFP36 ring finger protein [Source:HGNC Symbol;Acc:12862]	2.50047	4.23e-71	8.1e-69
ENSG00000124102	7	14	9	513	488	500	PI3	peptidase inhibitor 3, skin-derived [Source:HGNC Symbol;Acc:8947]	5.71726	8.27e-71	1.57e-68
ENSG00000006062	177	199	179	691	692	735	MAP3K14	mitogen-activated protein kinase kinase kinase 14 [Source:HGNC Symbol;Acc:6853]	1.96565	1.29e-69	2.42e-67
ENSG00000124171	2223	2160	2359	9458	8925	8476	PARD6B	par-6 family cell polarity regulator beta [Source:HGNC Symbol;Acc:16245]	1.95258	1.48e-69	2.75e-67
ENSG00000166016	369	469	444	1483	1381	1464	ABTB2	ankyrin repeat and BTB (POZ) domain containing 2 [Source:HGNC Symbol;Acc:23842]	1.79287	9.88e-69	1.82e-66
ENSG00000144802	1142	1223	1232	3188	2810	3107	NFKBIZ	nuclear factor of kappa light polypeptide gene enhancer in B-cells inhibitor, zeta [Source:HGNC Symbol;Acc:29805]	1.35984	5.54e-68	1.01e-65
ENSG00000143878	1354	1772	1800	11927	12089	10999	RHOB	ras homolog family member B [Source:HGNC Symbol;Acc:668]	2.80205	2.36e-67	4.26e-65
ENSG00000168209	140	180	166	1230	1172	1209	DDIT4	DNA-damage-inducible transcript 4 [Source:HGNC Symbol;Acc:24944]	2.89971	4.67e-67	8.35e-65
ENSG00000180884	312	379	315	43	41	28	ZNF792	zinc finger protein 792 [Source:HGNC Symbol;Acc:24751]	-3.20257	5.14e-65	9.11e-63
ENSG00000142961	301	336	365	988	974	1090	MOB3C	MOB kinase activator 3C [Source:HGNC Symbol;Acc:29800]	1.65668	1.12e-64	1.97e-62
ENSG00000143507	15	31	14	338	306	321	DUSP10	dual specificity phosphatase 10 [Source:HGNC Symbol;Acc:3065]	3.99026	5.25e-63	9.13e-61
ENSG00000077684	825	846	863	352	333	323	JADE1	jade family PHD finger 1 [Source:HGNC Symbol;Acc:30027]	-1.34662	4.49e-62	7.72e-60
ENSG00000179348	1580	1662	1499	365	368	382	GATA2	GATA binding protein 2 [Source:HGNC Symbol;Acc:4171]	-2.05308	1.36e-61	2.32e-59
ENSG00000170542	276	265	289	1170	1023	1066	SERPINB9	serpin peptidase inhibitor, clade B (ovalbumin), member 9 [Source:HGNC Symbol;Acc:8955]	1.96028	1.59e-60	2.69e-58
ENSG00000048052	79	76	90	391	428	372	HDAC9	histone deacetylase 9 [Source:HGNC Symbol;Acc:14065]	2.2253	2.57e-60	4.32e-58
ENSG00000005001	190	257	257	1532	1415	1681	PRSS22	protease, serine, 22 [Source:HGNC Symbol;Acc:14368]	2.75775	3.13e-60	5.2e-58
ENSG00000147454	796	846	777	1836	1608	1814	SLC25A37	solute carrier family 25 (mitochondrial iron transporter), member 37 [Source:HGNC Symbol;Acc:29786]	1.12118	1.75e-59	2.88e-57
ENSG00000111266	515	589	533	1668	1530	1504	DUSP16	dual specificity phosphatase 16 [Source:HGNC Symbol;Acc:17909]	1.51826	2.17e-59	3.55e-57
ENSG00000110047	1407	1576	1571	5360	5221	5632	EHD1	EH-domain containing 1 [Source:HGNC Symbol;Acc:3242]	1.86242	2.79e-59	4.51e-57
ENSG00000185033	1409	1523	1566	4255	4041	4167	SEMA4B	sema domain, immunoglobulin domain (Ig), transmembrane domain (TM) and short cytoplasmic domain, (semaphorin) 4B [Source:HGNC Symbol;Acc:10730]	1.49738	1.9e-58	3.05e-56
ENSG00000005073	518	535	471	105	145	126	HOXA11	homeobox A11 [Source:HGNC Symbol;Acc:5101]	-2.08758	4.91e-58	7.81e-56
ENSG00000105327	91	134	119	1313	1245	1305	BBC3	BCL2 binding component 3 [Source:HGNC Symbol;Acc:17868]	3.51782	5.39e-58	8.5e-56
ENSG00000181026	2142	2040	2059	4350	4308	4688	AEN	apoptosis enhancing nuclease [Source:HGNC Symbol;Acc:25722]	1.116	6.62e-58	1.04e-55
ENSG00000188910	1215	1223	1244	3179	3281	3775	GJB3	gap junction protein, beta 3, 31kDa [Source:HGNC Symbol;Acc:4285]	1.4957	5.01e-57	7.78e-55
ENSG00000161011	8737	9747	11146	31355	31997	31745	SQSTM1	sequestosome 1 [Source:HGNC Symbol;Acc:11280]	1.66943	6.63e-57	1.02e-54
ENSG00000010818	487	574	524	1632	1525	1566	HIVEP2	human immunodeficiency virus type I enhancer binding protein 2 [Source:HGNC Symbol;Acc:4921]	1.57478	8.27e-57	1.26e-54
ENSG00000141458	1113	1161	1152	2194	2245	2399	NPC1	Niemann-Pick disease, type C1 [Source:HGNC Symbol;Acc:7897]	1.00667	8.87e-57	1.34e-54
ENSG00000164056	370	371	347	79	61	83	SPRY1	sprouty homolog 1, antagonist of FGF signaling (Drosophila) [Source:HGNC Symbol;Acc:11269]	-2.27316	1.82e-56	2.73e-54
ENSG00000177606	1423	1692	1976	9169	9708	10183	JUN	jun proto-oncogene [Source:HGNC Symbol;Acc:6204]	2.52204	3.32e-56	4.96e-54
ENSG00000213859	219	217	251	1016	1010	1061	KCTD11	potassium channel tetramerization domain containing 11 [Source:HGNC Symbol;Acc:21302]	2.19741	3.62e-55	5.36e-53
ENSG00000143067	127	134	138	828	710	677	ZNF697	zinc finger protein 697 [Source:HGNC Symbol;Acc:32034]	2.44955	8.65e-55	1.27e-52
ENSG00000125378	4054	4139	4113	1361	1533	1499	BMP4	bone morphogenetic protein 4 [Source:HGNC Symbol;Acc:1071]	-1.47003	1.41e-53	2.06e-51
ENSG00000124224	32	25	26	291	243	277	PPP4R1L	protein phosphatase 4, regulatory subunit 1-like [Source:HGNC Symbol;Acc:15755]	3.29423	1.76e-53	2.55e-51
ENSG00000139725	503	545	486	1975	2049	2250	RHOF	ras homolog family member F (in filopodia) [Source:HGNC Symbol;Acc:15703]	2.07379	2.59e-53	3.71e-51
ENSG00000114019	1620	1709	1728	4279	4462	4560	AMOTL2	angiomotin like 2 [Source:HGNC Symbol;Acc:17812]	1.42169	5.02e-53	7.15e-51
ENSG00000184545	75	98	92	549	599	615	DUSP8	dual specificity phosphatase 8 [Source:HGNC Symbol;Acc:3074]	2.76615	1.58e-52	2.23e-50
ENSG00000088826	335	352	307	1364	1338	1402	SMOX	spermine oxidase [Source:HGNC Symbol;Acc:15862]	2.07408	2.41e-52	3.39e-50
ENSG00000159840	911	950	857	2356	2473	2518	ZYX	zyxin [Source:HGNC Symbol;Acc:13200]	1.46519	5.85e-52	8.14e-50
ENSG00000150907	597	545	533	2079	1824	1912	FOXO1	forkhead box O1 [Source:HGNC Symbol;Acc:3819]	1.78448	7.11e-52	9.83e-50
ENSG00000162783	321	322	328	1013	1074	1080	IER5	immediate early response 5 [Source:HGNC Symbol;Acc:5393]	1.70286	7.73e-52	1.06e-49
ENSG00000120738	513	622	685	2162	2345	2234	EGR1	early growth response 1 [Source:HGNC Symbol;Acc:3238]	1.88571	7.93e-52	1.08e-49
ENSG00000149115	3352	3557	3220	9581	9578	9958	TNKS1BP1	tankyrase 1 binding protein 1, 182kDa [Source:HGNC Symbol;Acc:19081]	1.54537	1.1e-51	1.49e-49
ENSG00000198355	831	1021	1000	5206	5142	5566	PIM3	pim-3 oncogene [Source:HGNC Symbol;Acc:19310]	2.49536	3.08e-51	4.14e-49
ENSG00000172183	86	114	102	377	336	397	ISG20	interferon stimulated exonuclease gene 20kDa [Source:HGNC Symbol;Acc:6130]	1.93994	4.71e-51	6.29e-49
ENSG00000112033	315	278	317	851	798	853	PPARD	peroxisome proliferator-activated receptor delta [Source:HGNC Symbol;Acc:9235]	1.47766	4.93e-51	6.54e-49
ENSG00000105371	3	4	7	421	436	400	ICAM4	intercellular adhesion molecule 4 (Landsteiner-Wiener blood group) [Source:HGNC Symbol;Acc:5347]	6.49077	9.34e-50	1.22e-47
ENSG00000117595	1721	1622	1542	3105	3089	3071	IRF6	interferon regulatory factor 6 [Source:HGNC Symbol;Acc:6121]	0.93541	9.35e-50	1.22e-47
ENSG00000178607	111	99	115	407	362	371	ERN1	endoplasmic reticulum to nucleus signaling 1 [Source:HGNC Symbol;Acc:3449]	1.83823	4.27e-49	5.54e-47
ENSG00000147883	366	376	385	1166	1103	1058	CDKN2B	cyclin-dependent kinase inhibitor 2B (p15, inhibits CDK4) [Source:HGNC Symbol;Acc:1788]	1.53681	5.6e-49	7.22e-47
ENSG00000135925	311	317	322	883	855	913	WNT10A	wingless-type MMTV integration site family, member 10A [Source:HGNC Symbol;Acc:13829]	1.51061	7.18e-49	9.2e-47
ENSG00000197261	314	314	327	1159	831	1068	C6orf141	chromosome 6 open reading frame 141 [Source:HGNC Symbol;Acc:21351]	1.72618	8.23e-49	1.05e-46
ENSG00000159110	134	152	122	538	518	533	IFNAR2	interferon (alpha, beta and omega) receptor 2 [Source:HGNC Symbol;Acc:5433]	1.90622	1.35e-48	1.7e-46
ENSG00000186480	2497	2613	2701	7119	7065	6295	INSIG1	insulin induced gene 1 [Source:HGNC Symbol;Acc:6083]	1.34308	4.31e-48	5.41e-46
ENSG00000184564	913	795	794	185	194	152	SLITRK6	SLIT and NTRK-like family, member 6 [Source:HGNC Symbol;Acc:23503]	-2.33224	9.17e-48	1.14e-45
ENSG00000179820	986	1207	1209	3520	3297	3448	MYADM	myeloid-associated differentiation marker [Source:HGNC Symbol;Acc:7544]	1.59881	3.09e-47	3.83e-45
ENSG00000162413	1181	1245	1317	4214	4162	4426	KLHL21	kelch-like family member 21 [Source:HGNC Symbol;Acc:29041]	1.79724	4.43e-47	5.45e-45
ENSG00000069399	48	71	80	635	646	652	BCL3	B-cell CLL/lymphoma 3 [Source:HGNC Symbol;Acc:998]	3.27178	4.77e-47	5.83e-45
ENSG00000175538	550	495	510	126	127	103	KCNE3	potassium voltage-gated channel, Isk-related family, member 3 [Source:HGNC Symbol;Acc:6243]	-2.12245	1.13e-46	1.37e-44
ENSG00000115963	1336	1373	1410	4531	4661	4345	RND3	Rho family GTPase 3 [Source:HGNC Symbol;Acc:671]	1.67327	1.16e-46	1.4e-44
ENSG00000184292	1630	1745	1593	3936	4182	4421	TACSTD2	tumor-associated calcium signal transducer 2 [Source:HGNC Symbol;Acc:11530]	1.36505	2.38e-46	2.85e-44
ENSG00000056558	16	14	16	247	218	254	TRAF1	TNF receptor-associated factor 1 [Source:HGNC Symbol;Acc:12031]	4.00569	1.08e-45	1.29e-43
ENSG00000038382	2720	2700	2750	4047	3700	3947	TRIO	trio Rho guanine nucleotide exchange factor [Source:HGNC Symbol;Acc:12303]	0.536616	1.72e-45	2.04e-43
ENSG00000145901	1330	1274	1297	3951	3915	3932	TNIP1	TNFAIP3 interacting protein 1 [Source:HGNC Symbol;Acc:16903]	1.66648	2.15e-45	2.52e-43
ENSG00000179833	621	731	655	2033	1945	1970	SERTAD2	SERTA domain containing 2 [Source:HGNC Symbol;Acc:30784]	1.55734	3.42e-45	4e-43
ENSG00000136826	143	179	186	566	591	575	KLF4	Kruppel-like factor 4 (gut) [Source:HGNC Symbol;Acc:6348]	1.76953	7.88e-45	9.16e-43
ENSG00000137267	712	733	732	2733	2736	2746	TUBB2A	tubulin, beta 2A class IIa [Source:HGNC Symbol;Acc:12412]	1.90179	1.28e-44	1.47e-42
ENSG00000006210	27	38	23	422	381	364	CX3CL1	chemokine (C-X3-C motif) ligand 1 [Source:HGNC Symbol;Acc:10647]	3.85263	4.64e-44	5.33e-42
ENSG00000104951	13	17	10	182	199	199	IL4I1	interleukin 4 induced 1 [Source:HGNC Symbol;Acc:19094]	3.88762	5.52e-44	6.3e-42
ENSG00000020577	676	803	699	1624	1590	1675	SAMD4A	sterile alpha motif domain containing 4A [Source:HGNC Symbol;Acc:23023]	1.15563	8.39e-44	9.52e-42
ENSG00000121797	112	110	95	549	497	513	CCRL2	chemokine (C-C motif) receptor-like 2 [Source:HGNC Symbol;Acc:1612]	2.33162	1.61e-43	1.81e-41
ENSG00000169242	137	141	158	441	418	448	EFNA1	ephrin-A1 [Source:HGNC Symbol;Acc:3221]	1.59093	2.29e-43	2.57e-41
ENSG00000167767	1670	1896	1699	4063	4169	4157	KRT80	keratin 80 [Source:HGNC Symbol;Acc:27056]	1.2421	3.41e-43	3.79e-41
ENSG00000114541	440	456	394	1382	1234	1249	FRMD4B	FERM domain containing 4B [Source:HGNC Symbol;Acc:24886]	1.58496	1.7e-42	1.88e-40
ENSG00000129451	1259	1281	1235	2904	2931	3093	KLK10	kallikrein-related peptidase 10 [Source:HGNC Symbol;Acc:6358]	1.28805	2.29e-41	2.52e-39
ENSG00000215012	1918	1924	1818	889	968	935	C22orf29	chromosome 22 open reading frame 29 [Source:HGNC Symbol;Acc:26112]	-1.00453	4.79e-41	5.25e-39
ENSG00000145911	36	25	33	242	212	233	N4BP3	NEDD4 binding protein 3 [Source:HGNC Symbol;Acc:29852]	2.94297	6.58e-41	7.17e-39
ENSG00000131323	500	531	499	1129	1152	1140	TRAF3	TNF receptor-associated factor 3 [Source:HGNC Symbol;Acc:12033]	1.15131	4.18e-40	4.52e-38
ENSG00000131797	103	104	110	388	283	392	CLUHP3	clustered mitochondria (cluA/CLU1) homolog pseudogene 3 [Source:HGNC Symbol;Acc:28447]	1.81969	5.16e-40	5.55e-38
ENSG00000123485	1882	1841	1742	857	981	977	HJURP	Holliday junction recognition protein [Source:HGNC Symbol;Acc:25444]	-0.956589	5.25e-40	5.62e-38
ENSG00000171617	4546	4672	4747	2620	2641	2598	ENC1	ectodermal-neural cortex 1 (with BTB domain) [Source:HGNC Symbol;Acc:3345]	-0.862356	6.28e-40	6.69e-38
ENSG00000179294	457	439	420	1269	1110	1290	C17orf96	chromosome 17 open reading frame 96 [Source:HGNC Symbol;Acc:34493]	1.50961	6.73e-40	7.12e-38
ENSG00000106031	1052	980	1029	225	253	171	HOXA13	homeobox A13 [Source:HGNC Symbol;Acc:5102]	-2.35072	2.35e-39	2.47e-37
ENSG00000140465	491	517	555	99	77	69	CYP1A1	cytochrome P450, family 1, subfamily A, polypeptide 1 [Source:HGNC Symbol;Acc:2595]	-2.69071	2.99e-39	3.12e-37
ENSG00000149798	774	783	808	1943	2164	2133	CDC42EP2	CDC42 effector protein (Rho GTPase binding) 2 [Source:HGNC Symbol;Acc:16263]	1.41478	3.75e-39	3.9e-37
ENSG00000102804	3857	3725	4343	9910	9809	9653	TSC22D1	TSC22 domain family, member 1 [Source:HGNC Symbol;Acc:16826]	1.27248	4.54e-39	4.7e-37
ENSG00000130513	588	679	732	3193	3241	3075	GDF15	growth differentiation factor 15 [Source:HGNC Symbol;Acc:30142]	2.26647	4.91e-39	5.05e-37
ENSG00000095951	504	524	463	1466	1269	1487	HIVEP1	human immunodeficiency virus type I enhancer binding protein 1 [Source:HGNC Symbol;Acc:4920]	1.49657	7.46e-39	7.64e-37
ENSG00000173846	182	276	281	1437	1271	1495	PLK3	polo-like kinase 3 [Source:HGNC Symbol;Acc:2154]	2.53487	1.12e-38	1.14e-36
ENSG00000008517	1	4	6	282	222	243	IL32	interleukin 32 [Source:HGNC Symbol;Acc:16830]	6.13819	1.22e-38	1.23e-36
ENSG00000204876	520	517	555	1318	1206	1234		Uncharacterized protein [Source:UniProtKB/TrEMBL;Acc:E9PBC9]	1.23143	1.65e-38	1.66e-36
ENSG00000167604	112	99	102	391	404	425	NFKBID	nuclear factor of kappa light polypeptide gene enhancer in B-cells inhibitor, delta [Source:HGNC Symbol;Acc:15671]	1.97273	2.46e-38	2.46e-36
ENSG00000173812	1274	1322	1265	2470	2168	2525	EIF1	eukaryotic translation initiation factor 1 [Source:HGNC Symbol;Acc:3249]	0.900926	3.77e-38	3.76e-36
ENSG00000162924	163	169	139	701	567	558	REL	v-rel avian reticuloendotheliosis viral oncogene homolog [Source:HGNC Symbol;Acc:9954]	1.96995	4e-38	3.97e-36
ENSG00000175793	1078	1196	1323	3140	3503	3672	SFN	stratifin [Source:HGNC Symbol;Acc:10773]	1.54991	4.33e-38	4.27e-36
ENSG00000165757	546	514	444	1279	1272	1415	KIAA1462	KIAA1462 [Source:HGNC Symbol;Acc:29283]	1.40927	5.25e-38	5.16e-36
ENSG00000249992	19	18	21	132	150	159	TMEM158	transmembrane protein 158 (gene/pseudogene) [Source:HGNC Symbol;Acc:30293]	2.93905	1.29e-37	1.26e-35
ENSG00000105855	628	600	570	1761	1509	1534	ITGB8	integrin, beta 8 [Source:HGNC Symbol;Acc:6163]	1.40663	1.97e-37	1.91e-35
ENSG00000140931	203	184	214	590	599	606	CMTM3	CKLF-like MARVEL transmembrane domain containing 3 [Source:HGNC Symbol;Acc:19174]	1.59194	3.94e-37	3.81e-35
ENSG00000156675	1193	1121	1242	2002	1938	1905	RAB11FIP1	RAB11 family interacting protein 1 (class I) [Source:HGNC Symbol;Acc:30265]	0.709241	1.22e-36	1.17e-34
ENSG00000137699	3447	3528	3564	6700	6664	7046	TRIM29	tripartite motif containing 29 [Source:HGNC Symbol;Acc:17274]	0.999656	1.28e-36	1.23e-34
ENSG00000164690	1079	1125	1168	3018	2916	3039	SHH	sonic hedgehog [Source:HGNC Symbol;Acc:10848]	1.40235	2.82e-36	2.68e-34
ENSG00000104689	808	797	731	1381	1504	1543	TNFRSF10A	tumor necrosis factor receptor superfamily, member 10a [Source:HGNC Symbol;Acc:11904]	0.934441	3.45e-36	3.27e-34
ENSG00000120709	1197	1219	1254	2377	2589	2437	FAM53C	family with sequence similarity 53, member C [Source:HGNC Symbol;Acc:1336]	1.01591	7.4e-36	6.97e-34
ENSG00000153234	67	55	57	248	256	220	NR4A2	nuclear receptor subfamily 4, group A, member 2 [Source:HGNC Symbol;Acc:7981]	2.05344	8e-36	7.5e-34
ENSG00000188015	10	9	13	131	157	156	S100A3	S100 calcium binding protein A3 [Source:HGNC Symbol;Acc:10493]	3.80146	9.96e-36	9.3e-34
ENSG00000189433	22	11	14	174	229	245	GJB4	gap junction protein, beta 4, 30.3kDa [Source:HGNC Symbol;Acc:4286]	3.81084	1.4e-35	1.3e-33
ENSG00000142178	259	334	298	980	965	939	SIK1	salt-inducible kinase 1 [Source:HGNC Symbol;Acc:11142]	1.69192	6.91e-35	6.36e-33
ENSG00000171236	394	376	371	981	925	879	LRG1	leucine-rich alpha-2-glycoprotein 1 [Source:HGNC Symbol;Acc:29480]	1.31085	6.91e-35	6.36e-33
ENSG00000106258	1259	1166	1195	3995	3252	3768	CYP3A5	cytochrome P450, family 3, subfamily A, polypeptide 5 [Source:HGNC Symbol;Acc:2638]	1.62833	8e-35	7.32e-33
ENSG00000158286	78	107	92	375	279	400	RNF207	ring finger protein 207 [Source:HGNC Symbol;Acc:32947]	2.00568	1e-34	9.11e-33
ENSG00000253293	1205	1233	1376	486	583	518	HOXA10	homeobox A10 [Source:HGNC Symbol;Acc:5100]	-1.29847	2.4e-34	2.18e-32
ENSG00000117289	1055	919	974	341	333	321	TXNIP	thioredoxin interacting protein [Source:HGNC Symbol;Acc:16952]	-1.57282	4.01e-34	3.62e-32
ENSG00000123240	690	672	606	1352	1221	1262	OPTN	optineurin [Source:HGNC Symbol;Acc:17142]	0.977851	1.2e-33	1.08e-31
ENSG00000160271	475	645	546	1905	1668	2132	RALGDS	ral guanine nucleotide dissociation stimulator [Source:HGNC Symbol;Acc:9842]	1.79257	1.44e-33	1.29e-31
ENSG00000120217	42	44	44	265	244	221	CD274	CD274 molecule [Source:HGNC Symbol;Acc:17635]	2.4982	2.96e-33	2.63e-31
ENSG00000176597	445	465	580	4391	4091	3439	B3GNT5	UDP-GlcNAc:betaGal beta-1,3-N-acetylglucosaminyltransferase 5 [Source:HGNC Symbol;Acc:15684]	2.90995	5.33e-33	4.71e-31
ENSG00000150347	601	559	608	206	203	188	ARID5B	AT rich interactive domain 5B (MRF1-like) [Source:HGNC Symbol;Acc:17362]	-1.58229	6.02e-33	5.31e-31
ENSG00000185650	385	442	461	1131	1080	1077	ZFP36L1	ZFP36 ring finger protein-like 1 [Source:HGNC Symbol;Acc:1107]	1.35616	7.19e-33	6.31e-31
ENSG00000132002	2243	2068	2201	4393	4241	4315	DNAJB1	DnaJ (Hsp40) homolog, subfamily B, member 1 [Source:HGNC Symbol;Acc:5270]	0.998185	7.56e-33	6.6e-31
ENSG00000109079	680	712	669	1228	1315	1307	TNFAIP1	tumor necrosis factor, alpha-induced protein 1 (endothelial) [Source:HGNC Symbol;Acc:11894]	0.903974	1.09e-32	9.46e-31
ENSG00000262447	680	712	669	1228	1315	1307	TNFAIP1	tumor necrosis factor, alpha-induced protein 1 (endothelial) [Source:HGNC Symbol;Acc:11894]	0.903974	1.09e-32	9.46e-31
ENSG00000196352	2546	2500	2403	8542	8372	8433	CD55	CD55 molecule, decay accelerating factor for complement (Cromer blood group) [Source:HGNC Symbol;Acc:2665]	1.74459	1.93e-32	1.66e-30
ENSG00000099860	35	54	67	293	287	311	GADD45B	growth arrest and DNA-damage-inducible, beta [Source:HGNC Symbol;Acc:4096]	2.52987	3.4e-32	2.91e-30
ENSG00000112658	724	810	774	1747	1791	1825	SRF	serum response factor (c-fos serum response element-binding transcription factor) [Source:HGNC Symbol;Acc:11291]	1.2472	5.5e-32	4.69e-30
ENSG00000135750	405	438	471	850	844	916	KCNK1	potassium channel, subfamily K, member 1 [Source:HGNC Symbol;Acc:6272]	0.99587	5.81e-32	4.94e-30
ENSG00000118707	492	470	522	954	1006	949	TGIF2	TGFB-induced factor homeobox 2 [Source:HGNC Symbol;Acc:15764]	0.96291	7.35e-32	6.22e-30
ENSG00000058668	250	273	271	580	537	650	ATP2B4	ATPase, Ca++ transporting, plasma membrane 4 [Source:HGNC Symbol;Acc:817]	1.17371	1.33e-31	1.12e-29
ENSG00000144354	1319	1238	1331	653	700	655	CDCA7	cell division cycle associated 7 [Source:HGNC Symbol;Acc:14628]	-1.028	1.42e-31	1.19e-29
ENSG00000178209	3378	5156	4518	18293	15867	18579	PLEC	plectin [Source:HGNC Symbol;Acc:9069]	2.07425	1.94e-31	1.61e-29
ENSG00000261109	3378	5156	4518	18293	15867	18579	PLEC	plectin [Source:HGNC Symbol;Acc:9069]	2.07425	1.94e-31	1.61e-29
ENSG00000198081	508	479	487	186	233	185	ZBTB14	zinc finger and BTB domain containing 14 [Source:HGNC Symbol;Acc:12860]	-1.3724	3.9e-31	3.23e-29
ENSG00000225130	656	531	702	2313	2625	2144	TRIM31	tripartite motif containing 31 [Source:HGNC Symbol;Acc:16289]	1.85224	4e-31	3.3e-29
ENSG00000115738	814	752	815	422	436	386	ID2	inhibitor of DNA binding 2, dominant negative helix-loop-helix protein [Source:HGNC Symbol;Acc:5361]	-0.971586	4.08e-31	3.34e-29
ENSG00000197019	924	1123	1211	3947	4068	4048	SERTAD1	SERTA domain containing 1 [Source:HGNC Symbol;Acc:17932]	1.90002	5.44e-31	4.44e-29
ENSG00000131941	1958	1951	2046	2968	3052	3097	RHPN2	rhophilin, Rho GTPase binding protein 2 [Source:HGNC Symbol;Acc:19974]	0.617437	2.85e-30	2.31e-28
ENSG00000080031	1584	1701	1748	3565	3644	3635	PTPRH	protein tyrosine phosphatase, receptor type, H [Source:HGNC Symbol;Acc:9672]	1.14114	5.13e-30	4.16e-28
ENSG00000196227	700	672	781	252	249	278	FAM217B	family with sequence similarity 217, member B [Source:HGNC Symbol;Acc:16170]	-1.50443	7.24e-30	5.83e-28
ENSG00000059728	584	610	692	1751	1573	1639	MXD1	MAX dimerization protein 1 [Source:HGNC Symbol;Acc:6761]	1.34852	8.85e-30	7.1e-28
ENSG00000023171	1396	1422	1317	684	737	703	GRAMD1B	GRAM domain containing 1B [Source:HGNC Symbol;Acc:29214]	-0.956828	1.45e-29	1.16e-27
ENSG00000013588	6449	6639	6603	10103	9945	10281	GPRC5A	G protein-coupled receptor, family C, group 5, member A [Source:HGNC Symbol;Acc:9836]	0.636694	3.48e-29	2.77e-27
ENSG00000169245	20	28	21	185	201	153	CXCL10	chemokine (C-X-C motif) ligand 10 [Source:HGNC Symbol;Acc:10637]	2.91747	4.37e-29	3.46e-27
ENSG00000183508	27	24	29	129	144	147	FAM46C	family with sequence similarity 46, member C [Source:HGNC Symbol;Acc:24712]	2.39614	7.34e-29	5.79e-27
ENSG00000161533	3262	2990	2896	5338	5071	4989	ACOX1	acyl-CoA oxidase 1, palmitoyl [Source:HGNC Symbol;Acc:119]	0.741763	8.9e-29	7e-27
ENSG00000123908	2612	3000	2847	5016	4613	4843	AGO2	argonaute RISC catalytic component 2 [Source:HGNC Symbol;Acc:3263]	0.815665	1.07e-28	8.39e-27
ENSG00000121060	2410	2541	2319	4105	3839	4018	TRIM25	tripartite motif containing 25 [Source:HGNC Symbol;Acc:12932]	0.731123	1.11e-28	8.68e-27
ENSG00000134138	1035	970	930	491	449	453	MEIS2	Meis homeobox 2 [Source:HGNC Symbol;Acc:7001]	-1.07302	1.46e-28	1.13e-26
ENSG00000144136	1917	1921	1909	2872	2872	2783	SLC20A1	solute carrier family 20 (phosphate transporter), member 1 [Source:HGNC Symbol;Acc:10946]	0.557695	2.2e-28	1.7e-26
ENSG00000034152	744	761	737	1953	1721	1985	MAP2K3	mitogen-activated protein kinase kinase 3 [Source:HGNC Symbol;Acc:6843]	1.36656	3.45e-28	2.66e-26
ENSG00000188549	144	155	119	456	355	490	C15orf52	chromosome 15 open reading frame 52 [Source:HGNC Symbol;Acc:33488]	1.69527	3.62e-28	2.77e-26
ENSG00000102760	446	497	497	933	987	999	RGCC	regulator of cell cycle [Source:HGNC Symbol;Acc:20369]	1.00451	4.56e-28	3.49e-26
ENSG00000163814	1163	1237	1168	1920	1827	1882	CDCP1	CUB domain containing protein 1 [Source:HGNC Symbol;Acc:24357]	0.659469	6.41e-28	4.87e-26
ENSG00000100003	157	177	172	390	427	434	SEC14L2	SEC14-like 2 (S. cerevisiae) [Source:HGNC Symbol;Acc:10699]	1.3166	8.1e-28	6.14e-26
ENSG00000106004	261	268	251	74	87	81	HOXA5	homeobox A5 [Source:HGNC Symbol;Acc:5106]	-1.74453	1.01e-27	7.59e-26
ENSG00000168502	441	471	444	987	835	964	SOGA2	SOGA family member 2 [Source:HGNC Symbol;Acc:29121]	1.07639	1.1e-27	8.24e-26
ENSG00000163235	3095	3138	3223	4734	4780	4610	TGFA	transforming growth factor, alpha [Source:HGNC Symbol;Acc:11765]	0.57719	1.23e-27	9.21e-26
ENSG00000181467	1316	1405	1409	2342	2340	2258	RAP2B	RAP2B, member of RAS oncogene family [Source:HGNC Symbol;Acc:9862]	0.724676	1.71e-27	1.28e-25
ENSG00000154640	216	221	215	642	631	567	BTG3	BTG family, member 3 [Source:HGNC Symbol;Acc:1132]	1.46934	2.43e-27	1.81e-25
ENSG00000132669	540	477	500	194	203	197	RIN2	Ras and Rab interactor 2 [Source:HGNC Symbol;Acc:18750]	-1.32692	2.53e-27	1.87e-25
ENSG00000110944	12	8	10	140	120	134	IL23A	interleukin 23, alpha subunit p19 [Source:HGNC Symbol;Acc:15488]	3.72283	4.14e-27	3.05e-25
ENSG00000125845	162	204	205	835	782	792	BMP2	bone morphogenetic protein 2 [Source:HGNC Symbol;Acc:1069]	2.05668	4.63e-27	3.4e-25
ENSG00000188215	356	342	312	681	656	616	DCUN1D3	DCN1, defective in cullin neddylation 1, domain containing 3 [Source:HGNC Symbol;Acc:28734]	0.938316	6.08e-27	4.45e-25
ENSG00000117036	728	627	577	1350	1221	1250	ETV3	ets variant 3 [Source:HGNC Symbol;Acc:3492]	0.996843	6.51e-27	4.75e-25
ENSG00000185551	383	419	407	137	148	151	NR2F2	nuclear receptor subfamily 2, group F, member 2 [Source:HGNC Symbol;Acc:7976]	-1.48388	7.07e-27	5.13e-25
ENSG00000108551	8	23	42	435	456	417	RASD1	RAS, dexamethasone-induced 1 [Source:HGNC Symbol;Acc:15828]	4.13079	9.37e-27	6.78e-25
ENSG00000173530	248	250	275	492	477	470	TNFRSF10D	tumor necrosis factor receptor superfamily, member 10d, decoy with truncated death domain [Source:HGNC Symbol;Acc:11907]	0.880283	1.13e-26	8.15e-25
ENSG00000125618	130	111	97	331	262	338	PAX8	paired box 8 [Source:HGNC Symbol;Acc:8622]	1.50633	2.17e-26	1.56e-24
ENSG00000241839	313	333	307	663	712	627	PLEKHO2	pleckstrin homology domain containing, family O member 2 [Source:HGNC Symbol;Acc:30026]	1.06765	2.42e-26	1.73e-24
ENSG00000161010	466	567	459	1598	1135	1438	C5orf45	chromosome 5 open reading frame 45 [Source:HGNC Symbol;Acc:30817]	1.50469	3.7e-26	2.64e-24
ENSG00000130449	334	348	340	700	623	646	ZSWIM6	zinc finger, SWIM-type containing 6 [Source:HGNC Symbol;Acc:29316]	0.951276	3.75e-26	2.66e-24
ENSG00000137193	218	284	267	671	670	726	PIM1	pim-1 oncogene [Source:HGNC Symbol;Acc:8986]	1.44742	4.34e-26	3.07e-24
ENSG00000173559	356	392	387	1447	1278	1257	NABP1	nucleic acid binding protein 1 [Source:HGNC Symbol;Acc:26232]	1.77381	4.98e-26	3.51e-24
ENSG00000124201	3184	3170	2979	5092	4905	5056	ZNFX1	zinc finger, NFX1-type containing 1 [Source:HGNC Symbol;Acc:29271]	0.71462	5.35e-26	3.76e-24
ENSG00000188522	873	1010	996	2262	2228	2428	FAM83G	family with sequence similarity 83, member G [Source:HGNC Symbol;Acc:32554]	1.29397	5.43e-26	3.8e-24
ENSG00000166387	405	415	443	113	135	123	PPFIBP2	PTPRF interacting protein, binding protein 2 (liprin beta 2) [Source:HGNC Symbol;Acc:9250]	-1.77669	1.13e-25	7.88e-24
ENSG00000092820	10301	10000	10001	16553	16859	17462	EZR	ezrin [Source:HGNC Symbol;Acc:12691]	0.76242	1.21e-25	8.36e-24
ENSG00000198576	57	64	85	336	411	378	ARC	activity-regulated cytoskeleton-associated protein [Source:HGNC Symbol;Acc:648]	2.48789	2.4e-25	1.66e-23
ENSG00000143514	1124	956	1040	1889	1792	1804	TP53BP2	tumor protein p53 binding protein, 2 [Source:HGNC Symbol;Acc:12000]	0.824878	2.55e-25	1.76e-23
ENSG00000155918	53	65	67	282	263	289	RAET1L	retinoic acid early transcript 1L [Source:HGNC Symbol;Acc:16798]	2.18225	3.29e-25	2.26e-23
ENSG00000141682	117	162	160	552	520	488	PMAIP1	phorbol-12-myristate-13-acetate-induced protein 1 [Source:HGNC Symbol;Acc:9108]	1.80036	5.92e-25	4.05e-23
ENSG00000172738	22	32	30	177	167	158	TMEM217	transmembrane protein 217 [Source:HGNC Symbol;Acc:21238]	2.56281	9.28e-25	6.32e-23
ENSG00000132003	23	47	21	174	123	144	ZSWIM4	zinc finger, SWIM-type containing 4 [Source:HGNC Symbol;Acc:25704]	2.3676	2.22e-24	1.51e-22
ENSG00000006453	2307	2316	2188	3381	3370	3559	BAIAP2L1	BAI1-associated protein 2-like 1 [Source:HGNC Symbol;Acc:21649]	0.612641	3.12e-24	2.11e-22
ENSG00000124225	2751	2885	2936	4631	4856	5017	PMEPA1	prostate transmembrane protein, androgen induced 1 [Source:HGNC Symbol;Acc:14107]	0.775201	3.32e-24	2.24e-22
ENSG00000085063	7633	7308	7671	12742	13561	13128	CD59	CD59 molecule, complement regulatory protein [Source:HGNC Symbol;Acc:1689]	0.771128	4.21e-24	2.83e-22
ENSG00000140332	474	522	484	984	1033	1118	TLE3	transducin-like enhancer of split 3 (E(sp1) homolog, Drosophila) [Source:HGNC Symbol;Acc:11839]	1.08649	5e-24	3.35e-22
ENSG00000198742	1944	2028	1837	3224	3090	3215	SMURF1	SMAD specific E3 ubiquitin protein ligase 1 [Source:HGNC Symbol;Acc:16807]	0.714956	7.24e-24	4.83e-22
ENSG00000149289	153	199	169	651	600	549	ZC3H12C	zinc finger CCCH-type containing 12C [Source:HGNC Symbol;Acc:29362]	1.73998	1.48e-23	9.87e-22
ENSG00000165572	553	509	526	251	253	232	KBTBD6	kelch repeat and BTB (POZ) domain containing 6 [Source:HGNC Symbol;Acc:25340]	-1.14632	1.5e-23	9.97e-22
ENSG00000255874	35	28	24	222	168	215	LINC00346	long intergenic non-protein coding RNA 346 [Source:HGNC Symbol;Acc:27492]	2.86078	1.52e-23	1e-21
ENSG00000227184	818	1087	997	2925	2456	2684	EPPK1	epiplakin 1 [Source:HGNC Symbol;Acc:15577]	1.53377	1.61e-23	1.06e-21
ENSG00000189143	2357	2843	2763	6496	7273	7625	CLDN4	claudin 4 [Source:HGNC Symbol;Acc:2046]	1.45893	2.09e-23	1.37e-21
ENSG00000262988	2357	2843	2763	6496	7273	7625	CLDN4	claudin 4 [Source:HGNC Symbol;Acc:2046]	1.45893	2.09e-23	1.37e-21
ENSG00000172216	678	788	777	2154	2211	2173	CEBPB	CCAAT/enhancer binding protein (C/EBP), beta [Source:HGNC Symbol;Acc:1834]	1.56205	2.42e-23	1.58e-21
ENSG00000124882	3940	3964	4391	18438	17377	15612	EREG	epiregulin [Source:HGNC Symbol;Acc:3443]	2.01993	2.56e-23	1.66e-21
ENSG00000173218	1862	1884	1956	1138	1322	1162	VANGL1	VANGL planar cell polarity protein 1 [Source:HGNC Symbol;Acc:15512]	-0.699926	3.34e-23	2.16e-21
ENSG00000163660	1243	1231	1384	3417	2909	3349	CCNL1	cyclin L1 [Source:HGNC Symbol;Acc:20569]	1.32032	4.72e-23	3.04e-21
ENSG00000117298	2966	2982	3091	5550	5445	5672	ECE1	endothelin converting enzyme 1 [Source:HGNC Symbol;Acc:3146]	0.89883	1e-22	6.43e-21
ENSG00000158050	289	293	361	1009	1205	1090	DUSP2	dual specificity phosphatase 2 [Source:HGNC Symbol;Acc:3068]	1.81424	1.12e-22	7.16e-21
ENSG00000168389	155	191	196	411	436	445	MFSD2A	major facilitator superfamily domain containing 2A [Source:HGNC Symbol;Acc:25897]	1.25365	1.22e-22	7.77e-21
ENSG00000064932	452	574	540	1710	1727	1844	SBNO2	strawberry notch homolog 2 (Drosophila) [Source:HGNC Symbol;Acc:29158]	1.79263	1.23e-22	7.83e-21
ENSG00000269926	48	46	46	242	285	342			2.62792	1.41e-22	8.92e-21
ENSG00000185112	11	19	13	92	123	90	FAM43A	family with sequence similarity 43, member A [Source:HGNC Symbol;Acc:26888]	2.76388	1.62e-22	1.02e-20
ENSG00000136802	1157	1318	1325	2110	2279	2213	LRRC8A	leucine rich repeat containing 8 family, member A [Source:HGNC Symbol;Acc:19027]	0.806348	3.28e-22	2.06e-20
ENSG00000116574	567	539	520	230	287	256	RHOU	ras homolog family member U [Source:HGNC Symbol;Acc:17794]	-1.15662	5.42e-22	3.39e-20
ENSG00000143375	1138	1138	1098	1715	1699	1854	CGN	cingulin [Source:HGNC Symbol;Acc:17429]	0.680204	5.41e-22	3.39e-20
ENSG00000104312	454	499	450	1211	1172	1109	RIPK2	receptor-interacting serine-threonine kinase 2 [Source:HGNC Symbol;Acc:10020]	1.27682	5.6e-22	3.49e-20
ENSG00000178935	935	860	834	358	385	353	ZNF552	zinc finger protein 552 [Source:HGNC Symbol;Acc:26135]	-1.25459	5.91e-22	3.67e-20
ENSG00000065361	3897	3949	3925	2750	2725	2665	ERBB3	v-erb-b2 avian erythroblastic leukemia viral oncogene homolog 3 [Source:HGNC Symbol;Acc:3431]	-0.518495	7.05e-22	4.36e-20
ENSG00000255150	6	10	4	166	71	126	EID3	EP300 interacting inhibitor of differentiation 3 [Source:HGNC Symbol;Acc:32961]	4.31889	8.53e-22	5.26e-20
ENSG00000189431	63	79	83	270	346	376	RASSF10	Ras association (RalGDS/AF-6) domain family (N-terminal) member 10 [Source:HGNC Symbol;Acc:33984]	2.14866	9.06e-22	5.57e-20
ENSG00000120093	485	486	476	210	228	208	HOXB3	homeobox B3 [Source:HGNC Symbol;Acc:5114]	-1.16202	9.24e-22	5.66e-20
ENSG00000070190	264	220	206	638	692	567	DAPP1	dual adaptor of phosphotyrosine and 3-phosphoinositides [Source:HGNC Symbol;Acc:16500]	1.42889	1.03e-21	6.28e-20
ENSG00000271303	2575	2454	2714	3909	4178	4131	SRXN1	sulfiredoxin 1 [Source:HGNC Symbol;Acc:16132]	0.671706	1.14e-21	6.95e-20
ENSG00000070495	693	621	629	1113	1075	1207	JMJD6	jumonji domain containing 6 [Source:HGNC Symbol;Acc:19355]	0.835564	1.31e-21	7.96e-20
ENSG00000125740	396	804	575	3757	4363	3602	FOSB	FBJ murine osteosarcoma viral oncogene homolog B [Source:HGNC Symbol;Acc:3797]	2.74235	2.41e-21	1.46e-19
ENSG00000175087	376	446	397	128	134	137	PDIK1L	PDLIM1 interacting kinase 1 like [Source:HGNC Symbol;Acc:18981]	-1.6667	2.41e-21	1.46e-19
ENSG00000087586	3934	3592	3677	2536	2800	2631	AURKA	aurora kinase A [Source:HGNC Symbol;Acc:11393]	-0.507557	2.47e-21	1.48e-19
ENSG00000261220	68	69	76	221	185	201			1.56565	2.53e-21	1.51e-19
ENSG00000144063	5971	6304	6219	8389	9037	9062	MALL	mal, T-cell differentiation protein-like [Source:HGNC Symbol;Acc:6818]	0.498831	2.68e-21	1.59e-19
ENSG00000156463	145	165	125	337	350	348	SH3RF2	SH3 domain containing ring finger 2 [Source:HGNC Symbol;Acc:26299]	1.24511	2.69e-21	1.59e-19
ENSG00000196639	204	196	189	470	453	412	HRH1	histamine receptor H1 [Source:HGNC Symbol;Acc:5182]	1.17682	2.66e-21	1.59e-19
ENSG00000197406	10	11	16	84	95	74	DIO3	deiodinase, iodothyronine, type III [Source:HGNC Symbol;Acc:2885]	2.76955	2.69e-21	1.59e-19
ENSG00000168394	49	55	52	144	138	151	TAP1	transporter 1, ATP-binding cassette, sub-family B (MDR/TAP) [Source:HGNC Symbol;Acc:43]	1.50018	3.27e-21	1.93e-19
ENSG00000171223	839	1231	1328	4919	5310	5316	JUNB	jun B proto-oncogene [Source:HGNC Symbol;Acc:6205]	2.23428	3.71e-21	2.18e-19
ENSG00000146648	3830	4135	3896	6703	6093	6521	EGFR	epidermal growth factor receptor [Source:HGNC Symbol;Acc:3236]	0.722902	4.45e-21	2.61e-19
ENSG00000111276	498	559	684	243	252	237	CDKN1B	cyclin-dependent kinase inhibitor 1B (p27, Kip1) [Source:HGNC Symbol;Acc:1785]	-1.28507	5.27e-21	3.08e-19
ENSG00000214922	0	0	0	0	0	3	HLA-F-AS1	HLA-F antisense RNA 1 [Source:HGNC Symbol;Acc:26645]	29.8553	5.92e-21	3.45e-19
ENSG00000143322	457	505	420	1251	1027	1030	ABL2	c-abl oncogene 2, non-receptor tyrosine kinase [Source:HGNC Symbol;Acc:77]	1.25652	6.86e-21	3.99e-19
ENSG00000078269	1625	1524	1442	2410	2263	2358	SYNJ2	synaptojanin 2 [Source:HGNC Symbol;Acc:11504]	0.620728	7.22e-21	4.18e-19
ENSG00000164086	89	109	90	231	229	247	DUSP7	dual specificity phosphatase 7 [Source:HGNC Symbol;Acc:3073]	1.31495	1.55e-20	8.94e-19
ENSG00000143013	2624	2732	2963	1417	1445	1374	LMO4	LIM domain only 4 [Source:HGNC Symbol;Acc:6644]	-1.0129	1.66e-20	9.58e-19
ENSG00000124575	3809	3557	3458	1521	1704	1690	HIST1H1D	histone cluster 1, H1d [Source:HGNC Symbol;Acc:4717]	-1.12662	2.55e-20	1.46e-18
ENSG00000072786	545	534	602	987	884	930	STK10	serine/threonine kinase 10 [Source:HGNC Symbol;Acc:11388]	0.779394	2.58e-20	1.48e-18
ENSG00000073008	6608	6537	6339	10134	10555	10999	PVR	poliovirus receptor [Source:HGNC Symbol;Acc:9705]	0.717543	2.89e-20	1.65e-18
ENSG00000183696	194	195	216	479	445	478	UPP1	uridine phosphorylase 1 [Source:HGNC Symbol;Acc:12576]	1.21402	3.25e-20	1.85e-18
ENSG00000100105	454	440	451	195	182	203	PATZ1	POZ (BTB) and AT hook containing zinc finger 1 [Source:HGNC Symbol;Acc:13071]	-1.18118	3.73e-20	2.12e-18
ENSG00000186174	431	558	560	1104	1087	1108	BCL9L	B-cell CLL/lymphoma 9-like [Source:HGNC Symbol;Acc:23688]	1.13794	4.4e-20	2.49e-18
ENSG00000179981	268	288	288	140	135	125	TSHZ1	teashirt zinc finger homeobox 1 [Source:HGNC Symbol;Acc:10669]	-1.06108	6.55e-20	3.7e-18
ENSG00000238279	56	56	52	187	185	201			1.87862	6.74e-20	3.79e-18
ENSG00000151689	1297	1204	1185	2063	2159	2100	INPP1	inositol polyphosphate-1-phosphatase [Source:HGNC Symbol;Acc:6071]	0.797363	6.92e-20	3.88e-18
ENSG00000101457	354	368	324	683	733	686	DNTTIP1	deoxynucleotidyltransferase, terminal, interacting protein 1 [Source:HGNC Symbol;Acc:16160]	1.01291	6.97e-20	3.89e-18
ENSG00000144959	1173	1178	1257	1996	2103	2022	NCEH1	neutral cholesterol ester hydrolase 1 [Source:HGNC Symbol;Acc:29260]	0.72355	7.77e-20	4.33e-18
ENSG00000134324	386	380	398	663	595	665	LPIN1	lipin 1 [Source:HGNC Symbol;Acc:13345]	0.747784	1.07e-19	5.97e-18
ENSG00000196182	678	732	761	1343	1376	1315	STK40	serine/threonine kinase 40 [Source:HGNC Symbol;Acc:21373]	0.892501	1.22e-19	6.74e-18
ENSG00000137936	1099	994	1043	1632	1776	1772	BCAR3	breast cancer anti-estrogen resistance 3 [Source:HGNC Symbol;Acc:973]	0.752238	1.37e-19	7.54e-18
ENSG00000054967	202	271	265	718	786	763	RELT	RELT tumor necrosis factor receptor [Source:HGNC Symbol;Acc:13764]	1.58479	1.45e-19	7.99e-18
ENSG00000130522	677	886	804	2345	2389	2318	JUND	jun D proto-oncogene [Source:HGNC Symbol;Acc:6206]	1.56448	1.8e-19	9.86e-18
ENSG00000260027	925	1008	959	579	584	539	HOXB7	homeobox B7 [Source:HGNC Symbol;Acc:5118]	-0.759966	1.85e-19	1.01e-17
ENSG00000144233	1044	1029	1066	1471	1530	1456	AMMECR1L	AMMECR1-like [Source:HGNC Symbol;Acc:28658]	0.486263	1.86e-19	1.02e-17
ENSG00000169991	1285	1288	1234	3479	3256	3799	IFFO2	intermediate filament family orphan 2 [Source:HGNC Symbol;Acc:27006]	1.47675	2.2e-19	1.19e-17
ENSG00000175573	268	264	262	601	563	674	C11orf68	chromosome 11 open reading frame 68 [Source:HGNC Symbol;Acc:28801]	1.22821	2.18e-19	1.19e-17
ENSG00000114315	636	705	718	344	385	366	HES1	hes family bHLH transcription factor 1 [Source:HGNC Symbol;Acc:5192]	-0.913344	2.29e-19	1.24e-17
ENSG00000167378	1477	1546	1486	2199	2091	2076	IRGQ	immunity-related GTPase family, Q [Source:HGNC Symbol;Acc:24868]	0.506513	2.47e-19	1.33e-17
ENSG00000108389	1163	1078	1035	643	717	583	MTMR4	myotubularin related protein 4 [Source:HGNC Symbol;Acc:7452]	-0.758789	2.53e-19	1.36e-17
ENSG00000165507	85	93	99	302	252	258	C10orf10	chromosome 10 open reading frame 10 [Source:HGNC Symbol;Acc:23355]	1.56376	3.08e-19	1.65e-17
ENSG00000057704	268	273	271	141	111	114	TMCC3	transmembrane and coiled-coil domain family 3 [Source:HGNC Symbol;Acc:29199]	-1.16518	3.6e-19	1.93e-17
ENSG00000110925	402	405	393	633	689	624	CSRNP2	cysteine-serine-rich nuclear protein 2 [Source:HGNC Symbol;Acc:16006]	0.684685	6.56e-19	3.5e-17
ENSG00000180011	1378	1305	1371	835	811	782	ZADH2	zinc binding alcohol dehydrogenase domain containing 2 [Source:HGNC Symbol;Acc:28697]	-0.791457	6.92e-19	3.68e-17
ENSG00000148840	1004	976	1006	1531	1508	1618	PPRC1	peroxisome proliferator-activated receptor gamma, coactivator-related 1 [Source:HGNC Symbol;Acc:30025]	0.673162	7.07e-19	3.75e-17
ENSG00000068745	740	735	765	1104	1059	1125	IP6K2	inositol hexakisphosphate kinase 2 [Source:HGNC Symbol;Acc:17313]	0.577821	7.38e-19	3.91e-17
ENSG00000198517	652	841	843	2125	2142	2095	MAFK	v-maf avian musculoaponeurotic fibrosarcoma oncogene homolog K [Source:HGNC Symbol;Acc:6782]	1.4825	7.49e-19	3.95e-17
ENSG00000088448	1404	1405	1417	2380	2013	2088	ANKRD10	ankyrin repeat domain 10 [Source:HGNC Symbol;Acc:20265]	0.617049	8.45e-19	4.45e-17
ENSG00000132481	374	410	440	934	1088	1158	TRIM47	tripartite motif containing 47 [Source:HGNC Symbol;Acc:19020]	1.42163	9.84e-19	5.16e-17
ENSG00000119401	604	625	598	376	359	374	TRIM32	tripartite motif containing 32 [Source:HGNC Symbol;Acc:16380]	-0.706414	1.01e-18	5.27e-17
ENSG00000111252	109	103	128	239	229	212	SH2B3	SH2B adaptor protein 3 [Source:HGNC Symbol;Acc:29605]	0.997092	1.09e-18	5.66e-17
ENSG00000178826	857	863	801	385	463	401	TMEM139	transmembrane protein 139 [Source:HGNC Symbol;Acc:22058]	-1.04089	1.11e-18	5.78e-17
ENSG00000197694	6023	5753	5117	9184	7757	9220	SPTAN1	spectrin, alpha, non-erythrocytic 1 [Source:HGNC Symbol;Acc:11273]	0.676781	1.18e-18	6.14e-17
ENSG00000116044	2426	2240	2241	4460	4312	4548	NFE2L2	nuclear factor, erythroid 2-like 2 [Source:HGNC Symbol;Acc:7782]	0.940172	1.24e-18	6.41e-17
ENSG00000156273	2014	1899	1939	4249	4279	3878	BACH1	BTB and CNC homology 1, basic leucine zipper transcription factor 1 [Source:HGNC Symbol;Acc:935]	1.04657	1.34e-18	6.9e-17
ENSG00000163347	510	503	454	1716	1588	1432	CLDN1	claudin 1 [Source:HGNC Symbol;Acc:2032]	1.62978	1.4e-18	7.2e-17
ENSG00000138061	4392	4501	4819	2453	2333	1986	CYP1B1	cytochrome P450, family 1, subfamily B, polypeptide 1 [Source:HGNC Symbol;Acc:2597]	-1.07639	1.5e-18	7.68e-17
ENSG00000151651	298	380	350	759	747	769	ADAM8	ADAM metallopeptidase domain 8 [Source:HGNC Symbol;Acc:215]	1.1549	1.61e-18	8.22e-17
ENSG00000196428	446	504	579	1169	1110	1026	TSC22D2	TSC22 domain family, member 2 [Source:HGNC Symbol;Acc:29095]	1.10762	1.81e-18	9.22e-17
ENSG00000080603	817	929	930	1461	1522	1652	SRCAP	Snf2-related CREBBP activator protein [Source:HGNC Symbol;Acc:16974]	0.8457	2.16e-18	1.1e-16
ENSG00000146072	6397	6361	6478	8789	9170	9408	TNFRSF21	tumor necrosis factor receptor superfamily, member 21 [Source:HGNC Symbol;Acc:13469]	0.506257	2.25e-18	1.14e-16
ENSG00000127666	40	44	30	158	157	182	TICAM1	toll-like receptor adaptor molecule 1 [Source:HGNC Symbol;Acc:18348]	2.16246	2.31e-18	1.17e-16
ENSG00000189325	15	16	14	110	115	90	C6orf222	chromosome 6 open reading frame 222 [Source:HGNC Symbol;Acc:33769]	2.79784	3.3e-18	1.67e-16
ENSG00000157483	1509	1497	1499	2171	2184	2246	MYO1E	myosin IE [Source:HGNC Symbol;Acc:7599]	0.553023	3.74e-18	1.88e-16
ENSG00000162344	1342	1459	1420	2256	2341	2280	FGF19	fibroblast growth factor 19 [Source:HGNC Symbol;Acc:3675]	0.682182	3.95e-18	1.98e-16
ENSG00000118513	470	400	413	213	236	214	MYB	v-myb avian myeloblastosis viral oncogene homolog [Source:HGNC Symbol;Acc:7545]	-0.988743	4.03e-18	2.02e-16
ENSG00000116584	1665	1627	1578	2518	2675	2773	ARHGEF2	Rho/Rac guanine nucleotide exchange factor (GEF) 2 [Source:HGNC Symbol;Acc:682]	0.733508	4.72e-18	2.35e-16
ENSG00000198431	18123	17001	16962	29210	29326	30441	TXNRD1	thioredoxin reductase 1 [Source:HGNC Symbol;Acc:12437]	0.763309	4.71e-18	2.35e-16
ENSG00000163435	1525	1774	1823	3999	4139	4328	ELF3	E74-like factor 3 (ets domain transcription factor, epithelial-specific ) [Source:HGNC Symbol;Acc:3318]	1.35536	6.19e-18	3.08e-16
ENSG00000150991	35615	33548	33580	62444	64876	66732	UBC	ubiquitin C [Source:HGNC Symbol;Acc:12468]	0.925498	6.45e-18	3.2e-16
ENSG00000215077	1981	1838	1853	2812	2896	3024	BRD2	bromodomain containing 2 [Source:HGNC Symbol;Acc:1103]	0.654907	7.11e-18	3.52e-16
ENSG00000166401	348	316	350	657	678	663	SERPINB8	serpin peptidase inhibitor, clade B (ovalbumin), member 8 [Source:HGNC Symbol;Acc:8952]	1.00823	7.32e-18	3.61e-16
ENSG00000146278	157	185	199	661	639	519	PNRC1	proline-rich nuclear receptor coactivator 1 [Source:HGNC Symbol;Acc:17278]	1.67608	7.78e-18	3.83e-16
ENSG00000134470	162	180	185	341	359	397	IL15RA	interleukin 15 receptor, alpha [Source:HGNC Symbol;Acc:5978]	1.10474	8.65e-18	4.24e-16
ENSG00000176915	3381	3355	3339	4744	4738	4950	ANKLE2	ankyrin repeat and LEM domain containing 2 [Source:HGNC Symbol;Acc:29101]	0.527146	9.41e-18	4.6e-16
ENSG00000143367	1172	1219	1321	2123	2152	1905	TUFT1	tuftelin 1 [Source:HGNC Symbol;Acc:12422]	0.728549	1.23e-17	6.02e-16
ENSG00000160888	858	1019	1103	2979	3059	3129	IER2	immediate early response 2 [Source:HGNC Symbol;Acc:28871]	1.64189	1.31e-17	6.38e-16
ENSG00000179023	433	467	453	176	113	171	KLHDC7A	kelch domain containing 7A [Source:HGNC Symbol;Acc:26791]	-1.47682	1.37e-17	6.68e-16
ENSG00000197249	3023	2791	2698	4383	4500	4847	SERPINA1	serpin peptidase inhibitor, clade A (alpha-1 antiproteinase, antitrypsin), member 1 [Source:HGNC Symbol;Acc:8941]	0.730259	1.39e-17	6.72e-16
ENSG00000104885	514	664	550	1248	1212	1254	DOT1L	DOT1-like histone H3K79 methyltransferase [Source:HGNC Symbol;Acc:24948]	1.14242	1.41e-17	6.81e-16
ENSG00000196917	1291	1279	1277	850	851	801	HCAR1	hydroxycarboxylic acid receptor 1 [Source:HGNC Symbol;Acc:4532]	-0.637726	1.61e-17	7.75e-16
ENSG00000174684	139	152	122	41	37	50	B3GNT1	UDP-GlcNAc:betaGal beta-1,3-N-acetylglucosaminyltransferase 1 [Source:HGNC Symbol;Acc:15685]	-1.66268	1.62e-17	7.79e-16
ENSG00000136504	1275	1242	1172	831	874	884	KAT7	K(lysine) acetyltransferase 7 [Source:HGNC Symbol;Acc:17016]	-0.513147	1.74e-17	8.36e-16
ENSG00000075420	2154	2130	2048	3424	3186	3112	FNDC3B	fibronectin type III domain containing 3B [Source:HGNC Symbol;Acc:24670]	0.621286	1.81e-17	8.64e-16
ENSG00000222047	0	3	3	100	65	119	C10orf55	chromosome 10 open reading frame 55 [Source:HGNC Symbol;Acc:31008]	5.64382	1.84e-17	8.76e-16
ENSG00000102178	2519	2608	2635	1334	1496	1494	UBL4A	ubiquitin-like 4A [Source:HGNC Symbol;Acc:12505]	-0.835959	1.85e-17	8.82e-16
ENSG00000138829	2	3	4	73	75	80	FBN2	fibrillin 2 [Source:HGNC Symbol;Acc:3604]	4.60682	2.67e-17	1.27e-15
ENSG00000130584	104	93	106	304	289	290	ZBTB46	zinc finger and BTB domain containing 46 [Source:HGNC Symbol;Acc:16094]	1.54013	2.87e-17	1.36e-15
ENSG00000126822	819	834	795	1407	1390	1432	PLEKHG3	pleckstrin homology domain containing, family G (with RhoGef domain) member 3 [Source:HGNC Symbol;Acc:20364]	0.827754	3.22e-17	1.52e-15
ENSG00000144677	2379	2355	2286	1728	1757	1583	CTDSPL	CTD (carboxy-terminal domain, RNA polymerase II, polypeptide A) small phosphatase-like [Source:HGNC Symbol;Acc:16890]	-0.505226	5.65e-17	2.66e-15
ENSG00000184014	577	578	519	845	848	878	DENND5A	DENN/MADD domain containing 5A [Source:HGNC Symbol;Acc:19344]	0.630357	6.74e-17	3.17e-15
ENSG00000181649	488	697	794	1945	2244	2293	PHLDA2	pleckstrin homology-like domain, family A, member 2 [Source:HGNC Symbol;Acc:12385]	1.73237	6.81e-17	3.19e-15
ENSG00000177981	440	390	367	195	224	204	ASB8	ankyrin repeat and SOCS box containing 8 [Source:HGNC Symbol;Acc:17183]	-0.963307	7.19e-17	3.36e-15
ENSG00000186272	281	303	277	113	148	121	ZNF17	zinc finger protein 17 [Source:HGNC Symbol;Acc:12958]	-1.22886	7.9e-17	3.69e-15
ENSG00000135114	778	777	791	1214	1389	1336	OASL	2'-5'-oligoadenylate synthetase-like [Source:HGNC Symbol;Acc:8090]	0.764101	1.1e-16	5.13e-15
ENSG00000221963	644	624	636	977	968	938	APOL6	apolipoprotein L, 6 [Source:HGNC Symbol;Acc:14870]	0.601058	1.11e-16	5.15e-15
ENSG00000198331	273	317	245	102	108	104	HYLS1	hydrolethalus syndrome 1 [Source:HGNC Symbol;Acc:26558]	-1.44342	1.29e-16	5.97e-15
ENSG00000197321	792	673	739	1228	1250	1374	SVIL	supervillin [Source:HGNC Symbol;Acc:11480]	0.821601	1.36e-16	6.28e-15
ENSG00000196754	549	506	530	951	991	1048	S100A2	S100 calcium binding protein A2 [Source:HGNC Symbol;Acc:10492]	0.937476	1.41e-16	6.51e-15
ENSG00000171604	982	1089	1185	608	649	609	CXXC5	CXXC finger protein 5 [Source:HGNC Symbol;Acc:26943]	-0.816943	1.56e-16	7.16e-15
ENSG00000230928	7	12	13	83	90	99			3.1073	1.58e-16	7.24e-15
ENSG00000006327	3974	3993	4031	7666	8050	8833	TNFRSF12A	tumor necrosis factor receptor superfamily, member 12A [Source:HGNC Symbol;Acc:18152]	1.10115	1.62e-16	7.42e-15
ENSG00000231105	3	2	1	92	75	94			5.45735	2.14e-16	9.78e-15
ENSG00000184009	53961	55708	57555	103828	109341	108646	ACTG1	actin, gamma 1 [Source:HGNC Symbol;Acc:144]	0.937049	2.16e-16	9.83e-15
ENSG00000158158	595	620	557	971	1018	1055	CNNM4	cyclin M4 [Source:HGNC Symbol;Acc:105]	0.797572	2.36e-16	1.07e-14
ENSG00000077238	764	790	778	1249	1294	1379	IL4R	interleukin 4 receptor [Source:HGNC Symbol;Acc:6015]	0.746472	2.4e-16	1.09e-14
ENSG00000215182	77	125	96	625	480	554	MUC5AC	mucin 5AC, oligomeric mucus/gel-forming [Source:HGNC Symbol;Acc:7515]	2.49508	2.49e-16	1.13e-14
ENSG00000196924	14645	16556	15818	31497	29417	33628	FLNA	filamin A, alpha [Source:HGNC Symbol;Acc:3754]	1.04503	2.83e-16	1.28e-14
ENSG00000164649	2045	1955	1950	1281	1242	1330	CDCA7L	cell division cycle associated 7-like [Source:HGNC Symbol;Acc:30777]	-0.625385	2.95e-16	1.33e-14
ENSG00000256646	639	560	565	287	298	282		Proteasome subunit alpha type-2 [Source:UniProtKB/TrEMBL;Acc:H3BT36]	-1.05416	3.01e-16	1.35e-14
ENSG00000175311	203	184	178	51	66	59	ANKS4B	ankyrin repeat and sterile alpha motif domain containing 4B [Source:HGNC Symbol;Acc:26795]	-1.78723	3.43e-16	1.54e-14
ENSG00000177469	3968	4102	3696	6360	6535	7053	PTRF	polymerase I and transcript release factor [Source:HGNC Symbol;Acc:9688]	0.796805	3.49e-16	1.56e-14
ENSG00000183421	290	278	268	527	578	580	RIPK4	receptor-interacting serine-threonine kinase 4 [Source:HGNC Symbol;Acc:496]	1.02103	3.6e-16	1.6e-14
ENSG00000052749	1686	1754	1625	2872	2841	3164	RRP12	ribosomal RNA processing 12 homolog (S. cerevisiae) [Source:HGNC Symbol;Acc:29100]	0.84321	3.77e-16	1.68e-14
ENSG00000151748	678	704	689	1165	1088	1103	SAV1	salvador homolog 1 (Drosophila) [Source:HGNC Symbol;Acc:17795]	0.667941	4.16e-16	1.85e-14
ENSG00000122512	510	475	519	305	309	300	PMS2	PMS2 postmeiotic segregation increased 2 (S. cerevisiae) [Source:HGNC Symbol;Acc:9122]	-0.733536	4.36e-16	1.93e-14
ENSG00000137673	1737	1808	1903	3798	4271	4306	MMP7	matrix metallopeptidase 7 (matrilysin, uterine) [Source:HGNC Symbol;Acc:7174]	1.16311	5.81e-16	2.57e-14
ENSG00000128272	6091	5920	6114	9425	9651	9919	ATF4	activating transcription factor 4 [Source:HGNC Symbol;Acc:786]	0.707465	6.17e-16	2.72e-14
ENSG00000134508	1406	1296	1409	828	834	802	CABLES1	Cdk5 and Abl enzyme substrate 1 [Source:HGNC Symbol;Acc:25097]	-0.726058	7.72e-16	3.39e-14
ENSG00000184254	4734	4685	4899	3678	3671	3764	ALDH1A3	aldehyde dehydrogenase 1 family, member A3 [Source:HGNC Symbol;Acc:409]	-0.383787	8.05e-16	3.53e-14
ENSG00000070718	439	411	414	200	250	235	AP3M2	adaptor-related protein complex 3, mu 2 subunit [Source:HGNC Symbol;Acc:570]	-0.883527	8.77e-16	3.84e-14
ENSG00000185567	119	143	115	278	220	292	AHNAK2	AHNAK nucleoprotein 2 [Source:HGNC Symbol;Acc:20125]	1.12636	8.92e-16	3.89e-14
ENSG00000110888	767	689	646	1795	1452	1594	CAPRIN2	caprin family member 2 [Source:HGNC Symbol;Acc:21259]	1.20929	9.5e-16	4.14e-14
ENSG00000008323	386	418	387	811	821	883	PLEKHG6	pleckstrin homology domain containing, family G (with RhoGef domain) member 6 [Source:HGNC Symbol;Acc:25562]	1.11749	1.15e-15	4.98e-14
ENSG00000088340	1283	1419	1310	2112	1835	2264	FER1L4	fer-1-like 4 (C. elegans), pseudogene [Source:HGNC Symbol;Acc:15801]	0.680568	1.4e-15	6.08e-14
ENSG00000206489	112	117	122	230	212	234	PPP1R10	protein phosphatase 1, regulatory subunit 10 [Source:HGNC Symbol;Acc:9284]	0.984065	1.41e-15	6.11e-14
ENSG00000161921	127	99	109	251	244	255	CXCL16	chemokine (C-X-C motif) ligand 16 [Source:HGNC Symbol;Acc:16642]	1.19801	1.56e-15	6.74e-14
ENSG00000175643	577	566	588	342	370	287	RMI2	RecQ mediated genome instability 2 [Source:HGNC Symbol;Acc:28349]	-0.859787	1.63e-15	7.02e-14
ENSG00000057657	44	39	32	144	123	143	PRDM1	PR domain containing 1, with ZNF domain [Source:HGNC Symbol;Acc:9346]	1.85612	2.08e-15	8.95e-14
ENSG00000100221	2032	2142	2125	2953	3112	3121	JOSD1	Josephin domain containing 1 [Source:HGNC Symbol;Acc:28953]	0.536739	2.21e-15	9.45e-14
ENSG00000104998	26	18	29	86	104	103	IL27RA	interleukin 27 receptor, alpha [Source:HGNC Symbol;Acc:17290]	2.00299	2.59e-15	1.11e-13
ENSG00000138678	766	782	684	1429	1370	1459	AGPAT9	1-acylglycerol-3-phosphate O-acyltransferase 9 [Source:HGNC Symbol;Acc:28157]	0.909295	2.68e-15	1.14e-13
ENSG00000179361	73	81	72	179	177	192	ARID3B	AT rich interactive domain 3B (BRIGHT-like) [Source:HGNC Symbol;Acc:14350]	1.31264	2.94e-15	1.25e-13
ENSG00000135245	511	480	539	208	262	224	HILPDA	hypoxia inducible lipid droplet-associated [Source:HGNC Symbol;Acc:28859]	-1.13436	3.08e-15	1.31e-13
ENSG00000196843	30	23	43	107	99	137	ARID5A	AT rich interactive domain 5A (MRF1-like) [Source:HGNC Symbol;Acc:17361]	1.84981	3.08e-15	1.31e-13
ENSG00000136048	125	120	115	290	279	236	DRAM1	DNA-damage regulated autophagy modulator 1 [Source:HGNC Symbol;Acc:25645]	1.13134	3.4e-15	1.44e-13
ENSG00000110042	1680	1568	1454	881	945	905	DTX4	deltex homolog 4 (Drosophila) [Source:HGNC Symbol;Acc:29151]	-0.783244	3.79e-15	1.6e-13
ENSG00000173039	754	930	794	1890	1732	2017	RELA	v-rel avian reticuloendotheliosis viral oncogene homolog A [Source:HGNC Symbol;Acc:9955]	1.23757	3.88e-15	1.63e-13
ENSG00000125266	2531	2627	2681	3693	3610	3753	EFNB2	ephrin-B2 [Source:HGNC Symbol;Acc:3227]	0.476835	4.01e-15	1.69e-13
ENSG00000075618	11	35	13	107	106	134	FSCN1	fascin homolog 1, actin-bundling protein (Strongylocentrotus purpuratus) [Source:HGNC Symbol;Acc:11148]	2.55354	4.57e-15	1.91e-13
ENSG00000180263	620	615	651	1320	1130	1191	FGD6	FYVE, RhoGEF and PH domain containing 6 [Source:HGNC Symbol;Acc:21740]	0.946527	4.65e-15	1.94e-13
ENSG00000167183	134	112	126	17	22	13	PRR15L	proline rich 15-like [Source:HGNC Symbol;Acc:28149]	-2.77037	5.12e-15	2.14e-13
ENSG00000103145	103	121	129	314	239	330	HCFC1R1	host cell factor C1 regulator 1 (XPO1 dependent) [Source:HGNC Symbol;Acc:21198]	1.38744	5.19e-15	2.16e-13
ENSG00000206450	0	4	0	62	77	86	HLA-B	major histocompatibility complex, class I, B [Source:HGNC Symbol;Acc:4932]	5.85698	5.61e-15	2.33e-13
ENSG00000128283	377	424	460	900	944	916	CDC42EP1	CDC42 effector protein (Rho GTPase binding) 1 [Source:HGNC Symbol;Acc:17014]	1.17262	5.87e-15	2.44e-13
ENSG00000090447	315	290	315	144	154	156	TFAP4	transcription factor AP-4 (activating enhancer binding protein 4) [Source:HGNC Symbol;Acc:11745]	-1.01058	6.37e-15	2.63e-13
ENSG00000156030	588	688	685	1139	1032	973	ELMSAN1	ELM2 and Myb/SANT-like domain containing 1 [Source:HGNC Symbol;Acc:19853]	0.705411	7.03e-15	2.9e-13
ENSG00000113657	144	120	130	275	253	280	DPYSL3	dihydropyrimidinase-like 3 [Source:HGNC Symbol;Acc:3015]	1.01764	8.11e-15	3.34e-13
ENSG00000141384	441	430	424	720	754	730	TAF4B	TAF4b RNA polymerase II, TATA box binding protein (TBP)-associated factor, 105kDa [Source:HGNC Symbol;Acc:11538]	0.779981	9.15e-15	3.76e-13
ENSG00000125775	135	147	162	299	328	298	SDCBP2	syndecan binding protein (syntenin) 2 [Source:HGNC Symbol;Acc:15756]	1.0586	9.61e-15	3.93e-13
ENSG00000198888	92	75	77	266	153	244	MT-ND1	mitochondrially encoded NADH dehydrogenase 1 [Source:HGNC Symbol;Acc:7455]	1.51382	9.59e-15	3.93e-13
ENSG00000173281	360	336	371	210	174	189	PPP1R3B	protein phosphatase 1, regulatory subunit 3B [Source:HGNC Symbol;Acc:14942]	-0.920967	9.94e-15	4.06e-13
ENSG00000231737	117	122	125	227	217	245	PPP1R10	protein phosphatase 1, regulatory subunit 10 [Source:HGNC Symbol;Acc:9284]	0.949224	1.04e-14	4.23e-13
ENSG00000235291	117	122	125	227	217	245	PPP1R10	protein phosphatase 1, regulatory subunit 10 [Source:HGNC Symbol;Acc:9284]	0.949224	1.04e-14	4.23e-13
ENSG00000150457	561	592	595	942	1019	873	LATS2	large tumor suppressor kinase 2 [Source:HGNC Symbol;Acc:6515]	0.695231	1.05e-14	4.26e-13
ENSG00000227804	117	122	125	227	217	245	PPP1R10	protein phosphatase 1, regulatory subunit 10 [Source:HGNC Symbol;Acc:9284]	0.949224	1.09e-14	4.4e-13
ENSG00000230995	117	122	125	227	217	245	PPP1R10	protein phosphatase 1, regulatory subunit 10 [Source:HGNC Symbol;Acc:9284]	0.949224	1.09e-14	4.4e-13
ENSG00000238104	117	122	125	227	217	245	PPP1R10	protein phosphatase 1, regulatory subunit 10 [Source:HGNC Symbol;Acc:9284]	0.949224	1.09e-14	4.4e-13
ENSG00000112972	3265	3503	3014	10735	10354	9938	HMGCS1	3-hydroxy-3-methylglutaryl-CoA synthase 1 (soluble) [Source:HGNC Symbol;Acc:5007]	1.61874	1.42e-14	5.72e-13
ENSG00000124216	13	18	16	51	57	78	SNAI1	snail family zinc finger 1 [Source:HGNC Symbol;Acc:11128]	2.04927	1.47e-14	5.91e-13
ENSG00000236011	31	0	0	0	0	0	GPANK1	G patch domain and ankyrin repeats 1 [Source:HGNC Symbol;Acc:13920]	-19.7263	1.7e-14	6.8e-13
ENSG00000170873	183	196	185	387	326	326	MTSS1	metastasis suppressor 1 [Source:HGNC Symbol;Acc:20443]	0.914095	1.71e-14	6.84e-13
ENSG00000135127	466	472	450	807	724	784	CCDC64	coiled-coil domain containing 64 [Source:HGNC Symbol;Acc:28095]	0.793985	1.81e-14	7.24e-13
ENSG00000100345	9898	11482	10677	17808	17300	19465	MYH9	myosin, heavy chain 9, non-muscle [Source:HGNC Symbol;Acc:7579]	0.802539	1.83e-14	7.27e-13
ENSG00000224888	29	37	34	125	106	144			2.03842	2.15e-14	8.52e-13
ENSG00000228991	81	76	59	265	229	240			1.84167	2.18e-14	8.63e-13
ENSG00000204569	117	122	125	227	217	240	PPP1R10	protein phosphatase 1, regulatory subunit 10 [Source:HGNC Symbol;Acc:9284]	0.938919	2.31e-14	9.14e-13
ENSG00000151929	556	585	595	835	867	844	BAG3	BCL2-associated athanogene 3 [Source:HGNC Symbol;Acc:939]	0.562446	2.57e-14	1.01e-12
ENSG00000183161	584	641	722	345	339	313	FANCF	Fanconi anemia, complementation group F [Source:HGNC Symbol;Acc:3587]	-1.02751	2.58e-14	1.01e-12
ENSG00000135926	6841	6640	6731	9308	10096	10236	TMBIM1	transmembrane BAX inhibitor motif containing 1 [Source:HGNC Symbol;Acc:23410]	0.572279	2.79e-14	1.1e-12
ENSG00000175745	174	194	162	96	91	84	NR2F1	nuclear receptor subfamily 2, group F, member 1 [Source:HGNC Symbol;Acc:7975]	-0.994556	3.3e-14	1.29e-12
ENSG00000171621	180	173	178	333	364	354	SPSB1	splA/ryanodine receptor domain and SOCS box containing 1 [Source:HGNC Symbol;Acc:30628]	0.990939	4.15e-14	1.62e-12
ENSG00000076706	205	228	214	407	373	400	MCAM	melanoma cell adhesion molecule [Source:HGNC Symbol;Acc:6934]	0.904064	4.2e-14	1.63e-12
ENSG00000140382	918	870	1007	626	629	584	HMG20A	high mobility group 20A [Source:HGNC Symbol;Acc:5001]	-0.627528	4.2e-14	1.63e-12
ENSG00000198938	6355	5718	4998	11229	8782	12240	MT-CO3	mitochondrially encoded cytochrome c oxidase III [Source:HGNC Symbol;Acc:7422]	0.929906	4.18e-14	1.63e-12
ENSG00000124391	0	0	1	202	221	201	IL17C	interleukin 17C [Source:HGNC Symbol;Acc:5983]	9.13625	4.24e-14	1.64e-12
ENSG00000016082	209	185	196	73	77	61	ISL1	ISL LIM homeobox 1 [Source:HGNC Symbol;Acc:6132]	-1.51985	4.25e-14	1.65e-12
ENSG00000168575	926	954	1026	1369	1379	1303	SLC20A2	solute carrier family 20 (phosphate transporter), member 2 [Source:HGNC Symbol;Acc:10947]	0.485369	5.21e-14	2.01e-12
ENSG00000085840	1128	1118	1118	665	738	706	ORC1	origin recognition complex, subunit 1 [Source:HGNC Symbol;Acc:8487]	-0.672318	5.32e-14	2.05e-12
ENSG00000164430	442	423	526	1163	1108	1007	MB21D1	Mab-21 domain containing 1 [Source:HGNC Symbol;Acc:21367]	1.19771	5.45e-14	2.1e-12
ENSG00000167601	223	238	215	381	456	485	AXL	AXL receptor tyrosine kinase [Source:HGNC Symbol;Acc:905]	0.965646	5.56e-14	2.14e-12
ENSG00000243156	432	474	446	748	707	739	MICAL3	microtubule associated monooxygenase, calponin and LIM domain containing 3 [Source:HGNC Symbol;Acc:24694]	0.721311	5.64e-14	2.16e-12
ENSG00000103160	557	551	539	331	377	312	HSDL1	hydroxysteroid dehydrogenase like 1 [Source:HGNC Symbol;Acc:16475]	-0.761531	5.79e-14	2.22e-12
ENSG00000102678	166	127	135	41	32	32	FGF9	fibroblast growth factor 9 [Source:HGNC Symbol;Acc:3687]	-2.10827	6.55e-14	2.5e-12
ENSG00000228705	44	50	43	152	141	136	LINC00659	long intergenic non-protein coding RNA 659 [Source:HGNC Symbol;Acc:44316]	1.68671	6.78e-14	2.58e-12
ENSG00000132825	372	432	441	159	191	172	PPP1R3D	protein phosphatase 1, regulatory subunit 3D [Source:HGNC Symbol;Acc:9294]	-1.28985	6.86e-14	2.61e-12
ENSG00000132326	370	350	388	595	586	561	PER2	period circadian clock 2 [Source:HGNC Symbol;Acc:8846]	0.649893	7.58e-14	2.88e-12
ENSG00000187678	798	901	894	1307	1246	1203	SPRY4	sprouty homolog 4 (Drosophila) [Source:HGNC Symbol;Acc:15533]	0.53945	8.33e-14	3.16e-12
ENSG00000050344	1386	1418	1171	2683	2621	2825	NFE2L3	nuclear factor, erythroid 2-like 3 [Source:HGNC Symbol;Acc:7783]	1.04357	8.88e-14	3.36e-12
ENSG00000121417	228	201	212	82	103	114	ZNF211	zinc finger protein 211 [Source:HGNC Symbol;Acc:13003]	-1.09017	9.03e-14	3.41e-12
ENSG00000083817	246	218	199	81	96	106	ZNF416	zinc finger protein 416 [Source:HGNC Symbol;Acc:20645]	-1.25004	9.23e-14	3.48e-12
ENSG00000103966	2666	2719	2847	3929	3955	3990	EHD4	EH-domain containing 4 [Source:HGNC Symbol;Acc:3245]	0.532965	9.25e-14	3.48e-12
ENSG00000142910	5233	5566	5511	10838	10993	11791	TINAGL1	tubulointerstitial nephritis antigen-like 1 [Source:HGNC Symbol;Acc:19168]	1.07151	1.07e-13	4.03e-12
ENSG00000159882	163	130	133	46	43	41	ZNF230	zinc finger protein 230 [Source:HGNC Symbol;Acc:13024]	-1.75904	1.09e-13	4.09e-12
ENSG00000133065	249	293	249	412	438	433	SLC41A1	solute carrier family 41 (magnesium transporter), member 1 [Source:HGNC Symbol;Acc:19429]	0.72252	1.28e-13	4.8e-12
ENSG00000143333	52	46	47	121	124	132	RGS16	regulator of G-protein signaling 16 [Source:HGNC Symbol;Acc:9997]	1.39717	1.41e-13	5.27e-12
ENSG00000102287	285	289	289	721	518	724	GABRE	gamma-aminobutyric acid (GABA) A receptor, epsilon [Source:HGNC Symbol;Acc:4085]	1.23177	1.6e-13	5.94e-12
ENSG00000104369	97	100	97	186	192	200	JPH1	junctophilin 1 [Source:HGNC Symbol;Acc:14201]	0.965734	1.7e-13	6.3e-12
ENSG00000198435	249	263	259	528	443	509	NRARP	NOTCH-regulated ankyrin repeat protein [Source:HGNC Symbol;Acc:33843]	0.959578	1.72e-13	6.37e-12
ENSG00000165684	240	278	232	496	439	549	SNAPC4	small nuclear RNA activating complex, polypeptide 4, 190kDa [Source:HGNC Symbol;Acc:11137]	1.04392	1.93e-13	7.13e-12
ENSG00000153767	617	545	562	339	335	300	GTF2E1	general transcription factor IIE, polypeptide 1, alpha 56kDa [Source:HGNC Symbol;Acc:4650]	-0.83435	2.03e-13	7.51e-12
ENSG00000104549	10005	9349	9770	14475	14990	14802	SQLE	squalene epoxidase [Source:HGNC Symbol;Acc:11279]	0.595311	2.12e-13	7.82e-12
ENSG00000100290	16	18	11	78	79	68	BIK	BCL2-interacting killer (apoptosis-inducing) [Source:HGNC Symbol;Acc:1051]	2.31347	2.31e-13	8.5e-12
ENSG00000253276	209	201	265	566	563	484	CCDC71L	coiled-coil domain containing 71-like [Source:HGNC Symbol;Acc:26685]	1.18404	2.4e-13	8.81e-12
ENSG00000148660	1340	1313	1354	837	993	836	CAMK2G	calcium/calmodulin-dependent protein kinase II gamma [Source:HGNC Symbol;Acc:1463]	-0.612308	2.53e-13	9.28e-12
ENSG00000115008	3	4	1	90	82	66	IL1A	interleukin 1, alpha [Source:HGNC Symbol;Acc:5991]	4.83453	2.62e-13	9.59e-12
ENSG00000158691	291	285	271	124	110	136	ZSCAN12	zinc finger and SCAN domain containing 12 [Source:HGNC Symbol;Acc:13172]	-1.13855	2.64e-13	9.65e-12
ENSG00000123689	5	8	6	65	69	77	G0S2	G0/G1switch 2 [Source:HGNC Symbol;Acc:30229]	3.49681	2.83e-13	1.03e-11
ENSG00000168672	10535	10754	10453	15074	14467	13535	FAM84B	family with sequence similarity 84, member B [Source:HGNC Symbol;Acc:24166]	0.425499	2.9e-13	1.06e-11
ENSG00000235884	208	187	171	385	336	345	LINC00941	long intergenic non-protein coding RNA 941 [Source:HGNC Symbol;Acc:48635]	0.93727	2.97e-13	1.08e-11
ENSG00000126603	97	156	153	300	298	341	GLIS2	GLIS family zinc finger 2 [Source:HGNC Symbol;Acc:29450]	1.256	3.12e-13	1.13e-11
ENSG00000185442	411	398	360	210	202	195	FAM174B	family with sequence similarity 174, member B [Source:HGNC Symbol;Acc:34339]	-0.947	3.17e-13	1.14e-11
ENSG00000177542	591	722	741	1590	1627	1894	SLC25A22	solute carrier family 25 (mitochondrial carrier: glutamate), member 22 [Source:HGNC Symbol;Acc:19954]	1.34803	3.47e-13	1.25e-11
ENSG00000143398	1829	1736	1827	2417	2465	2532	PIP5K1A	phosphatidylinositol-4-phosphate 5-kinase, type I, alpha [Source:HGNC Symbol;Acc:8994]	0.463217	3.5e-13	1.26e-11
ENSG00000234745	2	3	4	46	32	48	HLA-B	major histocompatibility complex, class I, B [Source:HGNC Symbol;Acc:4932]	3.89471	3.55e-13	1.27e-11
ENSG00000027697	2741	2548	2877	8260	8596	7912	IFNGR1	interferon gamma receptor 1 [Source:HGNC Symbol;Acc:5439]	1.53683	3.86e-13	1.38e-11
ENSG00000196136	26	8	16	118	100	99	SERPINA3	serpin peptidase inhibitor, clade A (alpha-1 antiproteinase, antitrypsin), member 3 [Source:HGNC Symbol;Acc:16]	2.69676	4.3e-13	1.54e-11
ENSG00000198805	2577	2379	2430	3489	3780	3856	PNP	purine nucleoside phosphorylase [Source:HGNC Symbol;Acc:7892]	0.594306	4.98e-13	1.78e-11
ENSG00000198712	2224	2079	1880	4172	2996	4536	MT-CO2	mitochondrially encoded cytochrome c oxidase II [Source:HGNC Symbol;Acc:7421]	0.966876	5.1e-13	1.82e-11
ENSG00000135862	1433	1347	1262	1860	1807	1847	LAMC1	laminin, gamma 1 (formerly LAMB2) [Source:HGNC Symbol;Acc:6492]	0.448179	5.32e-13	1.89e-11
ENSG00000114993	664	691	741	1110	1200	1267	RTKN	rhotekin [Source:HGNC Symbol;Acc:10466]	0.801222	5.46e-13	1.94e-11
ENSG00000253719	3041	2958	2856	2159	2135	2082	ATXN7L3B	ataxin 7-like 3B [Source:HGNC Symbol;Acc:37931]	-0.493106	5.64e-13	2e-11
ENSG00000170525	288	211	234	1639	1955	1583	PFKFB3	6-phosphofructo-2-kinase/fructose-2,6-biphosphatase 3 [Source:HGNC Symbol;Acc:8874]	2.5835	5.84e-13	2.07e-11
ENSG00000198886	224	242	205	756	439	665	MT-ND4	mitochondrially encoded NADH dehydrogenase 4 [Source:HGNC Symbol;Acc:7459]	1.53265	6.25e-13	2.21e-11
ENSG00000101194	620	694	712	1182	1099	1215	SLC17A9	solute carrier family 17 (vesicular nucleotide transporter), member 9 [Source:HGNC Symbol;Acc:16192]	0.8213	7.92e-13	2.79e-11
ENSG00000101665	408	438	450	695	671	697	SMAD7	SMAD family member 7 [Source:HGNC Symbol;Acc:6773]	0.690982	8.28e-13	2.92e-11
ENSG00000105643	618	705	648	1277	1295	1309	ARRDC2	arrestin domain containing 2 [Source:HGNC Symbol;Acc:25225]	1.00275	8.45e-13	2.97e-11
ENSG00000188396	25	32	17	144	77	117	TCTEX1D4	Tctex1 domain containing 4 [Source:HGNC Symbol;Acc:32315]	2.25349	1.01e-12	3.54e-11
ENSG00000169136	389	406	450	751	742	734	ATF5	activating transcription factor 5 [Source:HGNC Symbol;Acc:790]	0.868108	1.06e-12	3.7e-11
ENSG00000068323	423	629	510	1075	1037	896	TFE3	transcription factor binding to IGHM enhancer 3 [Source:HGNC Symbol;Acc:11752]	0.984524	1.32e-12	4.61e-11
ENSG00000130589	1667	2591	2440	6433	6124	6176	HELZ2	helicase with zinc finger 2, transcriptional coactivator [Source:HGNC Symbol;Acc:30021]	1.52572	1.37e-12	4.78e-11
ENSG00000145675	1989	1975	1869	1089	1076	992	PIK3R1	phosphoinositide-3-kinase, regulatory subunit 1 (alpha) [Source:HGNC Symbol;Acc:8979]	-0.949223	1.5e-12	5.24e-11
ENSG00000173276	314	334	331	686	615	581	ZBTB21	zinc finger and BTB domain containing 21 [Source:HGNC Symbol;Acc:13083]	0.935275	1.55e-12	5.4e-11
ENSG00000106144	758	788	752	495	541	501	CASP2	caspase 2, apoptosis-related cysteine peptidase [Source:HGNC Symbol;Acc:1503]	-0.603536	1.63e-12	5.65e-11
ENSG00000119986	124	135	125	226	244	254	AVPI1	arginine vasopressin-induced 1 [Source:HGNC Symbol;Acc:30898]	0.945213	1.77e-12	6.11e-11
ENSG00000165671	2174	2112	2059	1621	1517	1582	NSD1	nuclear receptor binding SET domain protein 1 [Source:HGNC Symbol;Acc:14234]	-0.415393	2.44e-12	8.44e-11
ENSG00000078399	301	404	398	116	94	166	HOXA9	homeobox A9 [Source:HGNC Symbol;Acc:5109]	-1.53516	2.66e-12	9.17e-11
ENSG00000144834	2	4	3	55	100	66	TAGLN3	transgelin 3 [Source:HGNC Symbol;Acc:29868]	4.64344	2.77e-12	9.53e-11
ENSG00000164093	134	155	163	56	60	43	PITX2	paired-like homeodomain 2 [Source:HGNC Symbol;Acc:9005]	-1.52794	2.79e-12	9.59e-11
ENSG00000118655	319	321	279	184	168	182	DCLRE1B	DNA cross-link repair 1B [Source:HGNC Symbol;Acc:17641]	-0.759689	2.8e-12	9.62e-11
ENSG00000114125	1139	1108	1209	803	899	818	RNF7	ring finger protein 7 [Source:HGNC Symbol;Acc:10070]	-0.480265	2.81e-12	9.63e-11
ENSG00000162757	156	155	166	78	75	65	C1orf74	chromosome 1 open reading frame 74 [Source:HGNC Symbol;Acc:26319]	-1.11396	2.86e-12	9.77e-11
ENSG00000167723	32	21	23	78	73	87	TRPV3	transient receptor potential cation channel, subfamily V, member 3 [Source:HGNC Symbol;Acc:18084]	1.70354	2.88e-12	9.82e-11
ENSG00000130821	1199	1260	1241	1871	1885	2044	SLC6A8	solute carrier family 6 (neurotransmitter transporter), member 8 [Source:HGNC Symbol;Acc:11055]	0.66653	3.01e-12	1.03e-10
ENSG00000130766	172	203	189	336	376	350	SESN2	sestrin 2 [Source:HGNC Symbol;Acc:20746]	0.910133	3.1e-12	1.05e-10
ENSG00000118689	1285	1378	1265	2213	2003	1956	FOXO3	forkhead box O3 [Source:HGNC Symbol;Acc:3821]	0.621699	3.18e-12	1.08e-10
ENSG00000100036	142	213	176	404	500	480	SLC35E4	solute carrier family 35, member E4 [Source:HGNC Symbol;Acc:17058]	1.41503	3.2e-12	1.09e-10
ENSG00000109971	103107	90274	90630	132380	137348	140101	HSPA8	heat shock 70kDa protein 8 [Source:HGNC Symbol;Acc:5241]	0.53231	3.22e-12	1.09e-10
ENSG00000122687	1672	1636	1529	1052	1128	1170	FTSJ2	FtsJ RNA methyltransferase homolog 2 (E. coli) [Source:HGNC Symbol;Acc:16352]	-0.52512	3.28e-12	1.11e-10
ENSG00000123080	107	120	116	48	51	36	CDKN2C	cyclin-dependent kinase inhibitor 2C (p18, inhibits CDK4) [Source:HGNC Symbol;Acc:1789]	-1.35843	3.32e-12	1.12e-10
ENSG00000162231	1024	941	873	1522	1462	1643	NXF1	nuclear RNA export factor 1 [Source:HGNC Symbol;Acc:8071]	0.71021	3.53e-12	1.19e-10
ENSG00000166579	492	431	470	725	734	760	NDEL1	nudE neurodevelopment protein 1-like 1 [Source:HGNC Symbol;Acc:17620]	0.6945	3.9e-12	1.31e-10
ENSG00000179094	76	87	80	168	167	174	PER1	period circadian clock 1 [Source:HGNC Symbol;Acc:8845]	1.10561	4.05e-12	1.36e-10
ENSG00000163348	918	925	989	585	668	588	PYGO2	pygopus family PHD finger 2 [Source:HGNC Symbol;Acc:30257]	-0.62034	5.04e-12	1.69e-10
ENSG00000055483	404	412	477	655	594	713	USP36	ubiquitin specific peptidase 36 [Source:HGNC Symbol;Acc:20062]	0.654673	5.34e-12	1.79e-10
ENSG00000160712	43	53	54	144	108	140	IL6R	interleukin 6 receptor [Source:HGNC Symbol;Acc:6019]	1.38961	5.8e-12	1.93e-10
ENSG00000122641	1	1	0	211	127	139	INHBA	inhibin, beta A [Source:HGNC Symbol;Acc:6066]	7.91983	6.18e-12	2.06e-10
ENSG00000031081	9	11	19	58	59	75	ARHGAP31	Rho GTPase activating protein 31 [Source:HGNC Symbol;Acc:29216]	2.31311	6.69e-12	2.22e-10
ENSG00000232126	45	59	53	178	186	170	HLA-B	major histocompatibility complex, class I, B [Source:HGNC Symbol;Acc:4932]	1.78056	7.04e-12	2.34e-10
ENSG00000170786	158	133	146	503	539	471	SDR16C5	short chain dehydrogenase/reductase family 16C, member 5 [Source:HGNC Symbol;Acc:30311]	1.74897	7.22e-12	2.39e-10
ENSG00000141582	239	311	310	632	663	595	CBX4	chromobox homolog 4 [Source:HGNC Symbol;Acc:1554]	1.15228	8.41e-12	2.78e-10
ENSG00000160570	805	915	893	1517	1574	1618	DEDD2	death effector domain containing 2 [Source:HGNC Symbol;Acc:24450]	0.878043	8.57e-12	2.83e-10
ENSG00000249709	219	191	199	91	102	76	ZNF564	zinc finger protein 564 [Source:HGNC Symbol;Acc:31106]	-1.24901	1.06e-11	3.49e-10
ENSG00000000457	286	285	311	148	173	151	SCYL3	SCY1-like 3 (S. cerevisiae) [Source:HGNC Symbol;Acc:19285]	-0.895971	1.1e-11	3.61e-10
ENSG00000124466	4	8	14	69	64	85	LYPD3	LY6/PLAUR domain containing 3 [Source:HGNC Symbol;Acc:24880]	3.07412	1.19e-11	3.91e-10
ENSG00000228630	240	188	209	57	89	76	HOTAIR	HOX transcript antisense RNA [Source:HGNC Symbol;Acc:33510]	-1.5828	1.21e-11	3.97e-10
ENSG00000125538	2	2	1	65	74	65	IL1B	interleukin 1, beta [Source:HGNC Symbol;Acc:5992]	5.22426	1.28e-11	4.18e-10
ENSG00000259330	61	57	67	149	134	130	LINC00984	long intergenic non-protein coding RNA 984 [Source:HGNC Symbol;Acc:35165]	1.15903	1.29e-11	4.22e-10
ENSG00000181634	149	111	129	294	284	265	TNFSF15	tumor necrosis factor (ligand) superfamily, member 15 [Source:HGNC Symbol;Acc:11931]	1.09195	1.42e-11	4.63e-10
ENSG00000186205	403	365	385	252	279	224	2018-03-01	mitochondrial amidoxime reducing component 1 [Source:HGNC Symbol;Acc:26189]	-0.668466	1.42e-11	4.63e-10
ENSG00000181894	219	206	211	98	136	92	ZNF329	zinc finger protein 329 [Source:HGNC Symbol;Acc:14209]	-0.99696	1.43e-11	4.65e-10
ENSG00000158062	143	163	191	372	327	373	UBXN11	UBX domain protein 11 [Source:HGNC Symbol;Acc:30600]	1.1237	1.44e-11	4.68e-10
ENSG00000175556	189	187	163	312	313	311	LONRF3	LON peptidase N-terminal domain and ring finger 3 [Source:HGNC Symbol;Acc:21152]	0.842706	1.45e-11	4.7e-10
ENSG00000167173	411	474	444	844	881	947	C15orf39	chromosome 15 open reading frame 39 [Source:HGNC Symbol;Acc:24497]	1.06689	1.57e-11	5.08e-10
ENSG00000179750	217	200	208	327	389	405	APOBEC3B	apolipoprotein B mRNA editing enzyme, catalytic polypeptide-like 3B [Source:HGNC Symbol;Acc:17352]	0.848526	1.58e-11	5.11e-10
ENSG00000187626	103	90	54	23	16	26	ZKSCAN4	zinc finger with KRAB and SCAN domains 4 [Source:HGNC Symbol;Acc:13854]	-1.86555	1.6e-11	5.15e-10
ENSG00000069020	7	14	11	48	50	81	MAST4	microtubule associated serine/threonine kinase family member 4 [Source:HGNC Symbol;Acc:19037]	2.53135	1.61e-11	5.17e-10
ENSG00000240990	222	201	239	99	100	90	HOXA11-AS	HOXA11 antisense RNA [Source:HGNC Symbol;Acc:24957]	-1.15846	1.76e-11	5.65e-10
ENSG00000164626	674	690	682	1237	1201	1210	KCNK5	potassium channel, subfamily K, member 5 [Source:HGNC Symbol;Acc:6280]	0.821897	1.77e-11	5.66e-10
ENSG00000023330	1205	1079	1002	1515	1680	1558	ALAS1	aminolevulinate, delta-, synthase 1 [Source:HGNC Symbol;Acc:396]	0.528306	1.8e-11	5.77e-10
ENSG00000131779	299	285	302	166	192	172	PEX11B	peroxisomal biogenesis factor 11 beta [Source:HGNC Symbol;Acc:8853]	-0.79959	1.82e-11	5.83e-10
ENSG00000100625	145	132	116	261	281	219	SIX4	SIX homeobox 4 [Source:HGNC Symbol;Acc:10890]	0.902705	1.85e-11	5.89e-10
ENSG00000109189	530	532	503	335	357	311	USP46	ubiquitin specific peptidase 46 [Source:HGNC Symbol;Acc:20075]	-0.748972	1.91e-11	6.09e-10
ENSG00000261413	1977	2069	2026	2570	2450	2427	SOCS7	suppressor of cytokine signaling 7 [Source:HGNC Symbol;Acc:29846]	0.298446	2e-11	6.36e-10
ENSG00000197037	398	454	393	237	251	276	ZSCAN25	zinc finger and SCAN domain containing 25 [Source:HGNC Symbol;Acc:21961]	-0.691134	2.27e-11	7.21e-10
ENSG00000139722	1184	1329	1361	2274	2252	2302	VPS37B	vacuolar protein sorting 37 homolog B (S. cerevisiae) [Source:HGNC Symbol;Acc:25754]	0.845213	2.41e-11	7.64e-10
ENSG00000110987	301	296	299	185	175	147	BCL7A	B-cell CLL/lymphoma 7A [Source:HGNC Symbol;Acc:1004]	-0.83055	2.68e-11	8.47e-10
ENSG00000151093	254	264	264	151	163	145	OXSM	3-oxoacyl-ACP synthase, mitochondrial [Source:HGNC Symbol;Acc:26063]	-0.832622	2.97e-11	9.37e-10
ENSG00000130844	228	254	248	131	107	104	ZNF331	zinc finger protein 331 [Source:HGNC Symbol;Acc:15489]	-1.07067	3.04e-11	9.59e-10
ENSG00000109787	1621	1622	1689	3296	3105	2804	KLF3	Kruppel-like factor 3 (basic) [Source:HGNC Symbol;Acc:16516]	0.855192	3.08e-11	9.68e-10
ENSG00000221909	149	150	149	60	73	63	FAM200A	family with sequence similarity 200, member A [Source:HGNC Symbol;Acc:25401]	-1.305	3.3e-11	1.04e-09
ENSG00000198727	283	277	208	819	449	691	MT-CYB	mitochondrially encoded cytochrome b [Source:HGNC Symbol;Acc:7427]	1.41579	3.44e-11	1.08e-09
ENSG00000104419	84	78	96	157	197	188	NDRG1	N-myc downstream regulated 1 [Source:HGNC Symbol;Acc:7679]	1.06926	3.69e-11	1.15e-09
ENSG00000167470	283	341	332	766	834	782	MIDN	midnolin [Source:HGNC Symbol;Acc:16298]	1.32737	3.67e-11	1.15e-09
ENSG00000148841	129	130	153	263	233	261	ITPRIP	inositol 1,4,5-trisphosphate receptor interacting protein [Source:HGNC Symbol;Acc:29370]	0.901662	4.01e-11	1.25e-09
ENSG00000166197	5706	5480	5399	6743	6965	6885	NOLC1	nucleolar and coiled-body phosphoprotein 1 [Source:HGNC Symbol;Acc:15608]	0.304827	4e-11	1.25e-09
ENSG00000196449	948	881	908	1366	1415	1416	YRDC	yrdC N(6)-threonylcarbamoyltransferase domain containing [Source:HGNC Symbol;Acc:28905]	0.602748	3.99e-11	1.25e-09
ENSG00000164251	2668	2527	2710	3345	3670	3477	F2RL1	coagulation factor II (thrombin) receptor-like 1 [Source:HGNC Symbol;Acc:3538]	0.38808	4.2e-11	1.3e-09
ENSG00000104140	24	28	34	102	90	91	RHOV	ras homolog family member V [Source:HGNC Symbol;Acc:18313]	1.76494	4.7e-11	1.46e-09
ENSG00000198899	190	163	138	534	347	444	MT-ATP6	mitochondrially encoded ATP synthase 6 [Source:HGNC Symbol;Acc:7414]	1.45481	4.96e-11	1.54e-09
ENSG00000035403	3830	3686	3482	5390	5369	5416	VCL	vinculin [Source:HGNC Symbol;Acc:12665]	0.544481	5.11e-11	1.58e-09
ENSG00000135900	1179	1160	1162	801	852	912	MRPL44	mitochondrial ribosomal protein L44 [Source:HGNC Symbol;Acc:16650]	-0.45576	5.42e-11	1.67e-09
ENSG00000065970	184	180	198	91	107	112	FOXJ2	forkhead box J2 [Source:HGNC Symbol;Acc:24818]	-0.877576	5.66e-11	1.74e-09
ENSG00000118985	562	508	560	1062	1007	1064	ELL2	elongation factor, RNA polymerase II, 2 [Source:HGNC Symbol;Acc:17064]	0.929795	5.82e-11	1.79e-09
ENSG00000128591	3	2	1	42	30	42	FLNC	filamin C, gamma [Source:HGNC Symbol;Acc:3756]	4.35252	5.84e-11	1.79e-09
ENSG00000050820	1420	2021	2008	3795	4074	4202	BCAR1	breast cancer anti-estrogen resistance 1 [Source:HGNC Symbol;Acc:971]	1.17479	6.14e-11	1.88e-09
ENSG00000118515	3753	3537	3806	5317	5374	5557	SGK1	serum/glucocorticoid regulated kinase 1 [Source:HGNC Symbol;Acc:10810]	0.532599	6.41e-11	1.96e-09
ENSG00000198026	499	613	540	869	800	828	ZNF335	zinc finger protein 335 [Source:HGNC Symbol;Acc:15807]	0.647506	6.46e-11	1.97e-09
ENSG00000167106	689	762	765	1131	1050	1185	FAM102A	family with sequence similarity 102, member A [Source:HGNC Symbol;Acc:31419]	0.626676	6.66e-11	2.03e-09
ENSG00000198804	7142	6742	6099	15191	10802	15755	MT-CO1	mitochondrially encoded cytochrome c oxidase I [Source:HGNC Symbol;Acc:7419]	1.09771	6.81e-11	2.07e-09
ENSG00000174500	7	11	13	75	51	54	GCSAM	germinal center-associated, signaling and motility [Source:HGNC Symbol;Acc:20253]	2.64945	7.22e-11	2.2e-09
ENSG00000167333	230	229	257	136	128	136	TRIM68	tripartite motif containing 68 [Source:HGNC Symbol;Acc:21161]	-0.810423	7.51e-11	2.28e-09
ENSG00000120696	169	184	234	54	86	68	KBTBD7	kelch repeat and BTB (POZ) domain containing 7 [Source:HGNC Symbol;Acc:25266]	-1.69996	8e-11	2.43e-09
ENSG00000127528	9	10	19	59	47	56	KLF2	Kruppel-like factor 2 [Source:HGNC Symbol;Acc:6347]	2.1702	8.85e-11	2.68e-09
ENSG00000143466	151	158	175	306	297	301	IKBKE	inhibitor of kappa light polypeptide gene enhancer in B-cells, kinase epsilon [Source:HGNC Symbol;Acc:14552]	0.898246	9.43e-11	2.85e-09
ENSG00000139263	222	186	159	64	87	72	LRIG3	leucine-rich repeats and immunoglobulin-like domains 3 [Source:HGNC Symbol;Acc:30991]	-1.36004	9.72e-11	2.93e-09
ENSG00000163884	51	37	43	12	11	7	KLF15	Kruppel-like factor 15 [Source:HGNC Symbol;Acc:14536]	-2.19147	9.74e-11	2.93e-09
ENSG00000146197	4	4	7	64	36	37	SCUBE3	signal peptide, CUB domain, EGF-like 3 [Source:HGNC Symbol;Acc:13655]	3.29416	1.02e-10	3.06e-09
ENSG00000186832	1	0	1	70	74	87	KRT16	keratin 16 [Source:HGNC Symbol;Acc:6423]	6.87161	1.03e-10	3.08e-09
ENSG00000115163	535	518	546	354	376	313	CENPA	centromere protein A [Source:HGNC Symbol;Acc:1851]	-0.624546	1.03e-10	3.1e-09
ENSG00000101276	558	603	618	1101	1158	1101	SLC52A3	solute carrier family 52 (riboflavin transporter), member 3 [Source:HGNC Symbol;Acc:16187]	0.936556	1.04e-10	3.11e-09
ENSG00000135845	666	690	691	410	448	475	PIGC	phosphatidylinositol glycan anchor biosynthesis, class C [Source:HGNC Symbol;Acc:8960]	-0.6792	1.05e-10	3.12e-09
ENSG00000096696	1888	1955	1563	2792	2400	2977	DSP	desmoplakin [Source:HGNC Symbol;Acc:3052]	0.628102	1.16e-10	3.45e-09
ENSG00000113716	1578	1516	1492	2047	2087	2147	HMGXB3	HMG box domain containing 3 [Source:HGNC Symbol;Acc:28982]	0.471038	1.23e-10	3.67e-09
ENSG00000182197	2844	2709	2442	3430	3509	3546	EXT1	exostosin glycosyltransferase 1 [Source:HGNC Symbol;Acc:3512]	0.394454	1.29e-10	3.84e-09
ENSG00000051180	732	713	741	523	530	503	RAD51	RAD51 recombinase [Source:HGNC Symbol;Acc:9817]	-0.510154	1.3e-10	3.85e-09
ENSG00000204490	0	0	0	59	53	62	TNF	tumor necrosis factor [Source:HGNC Symbol;Acc:11892]	8.29734	1.38e-10	4.04e-09
ENSG00000206439	0	0	0	59	53	62	TNF	tumor necrosis factor [Source:HGNC Symbol;Acc:11892]	8.29734	1.38e-10	4.04e-09
ENSG00000223952	0	0	0	59	53	62	TNF	tumor necrosis factor [Source:HGNC Symbol;Acc:11892]	8.29734	1.38e-10	4.04e-09
ENSG00000228321	0	0	0	59	53	62	TNF	tumor necrosis factor [Source:HGNC Symbol;Acc:11892]	8.29734	1.38e-10	4.04e-09
ENSG00000228849	0	0	0	59	53	62	TNF	tumor necrosis factor [Source:HGNC Symbol;Acc:11892]	8.29734	1.38e-10	4.04e-09
ENSG00000230108	0	0	0	59	53	62	TNF	tumor necrosis factor [Source:HGNC Symbol;Acc:11892]	8.29734	1.38e-10	4.04e-09
ENSG00000232810	0	0	0	59	53	62	TNF	tumor necrosis factor [Source:HGNC Symbol;Acc:11892]	8.29734	1.38e-10	4.04e-09
ENSG00000106261	1674	1639	1652	1229	1171	1195	ZKSCAN1	zinc finger with KRAB and SCAN domains 1 [Source:HGNC Symbol;Acc:13101]	-0.475803	1.49e-10	4.37e-09
ENSG00000083799	533	456	493	985	800	889	CYLD	cylindromatosis (turban tumor syndrome) [Source:HGNC Symbol;Acc:2584]	0.832326	1.55e-10	4.53e-09
ENSG00000197063	1306	1389	1424	2025	2011	1985	MAFG	v-maf avian musculoaponeurotic fibrosarcoma oncogene homolog G [Source:HGNC Symbol;Acc:6781]	0.555031	1.58e-10	4.62e-09
ENSG00000143384	6551	6814	7142	19814	17292	15618	MCL1	myeloid cell leukemia sequence 1 (BCL2-related) [Source:HGNC Symbol;Acc:6943]	1.28883	1.61e-10	4.7e-09
ENSG00000198142	1268	1376	1558	2732	2564	2209	SOWAHC	sosondowah ankyrin repeat domain family member C [Source:HGNC Symbol;Acc:26149]	0.814731	1.61e-10	4.7e-09
ENSG00000142634	1454	1663	1639	2579	2829	2795	EFHD2	EF-hand domain family, member D2 [Source:HGNC Symbol;Acc:28670]	0.81261	1.69e-10	4.91e-09
ENSG00000101945	720	707	715	420	453	475	SUV39H1	suppressor of variegation 3-9 homolog 1 (Drosophila) [Source:HGNC Symbol;Acc:11479]	-0.655226	1.69e-10	4.92e-09
ENSG00000198786	213	206	179	781	397	602	MT-ND5	mitochondrially encoded NADH dehydrogenase 5 [Source:HGNC Symbol;Acc:7461]	1.62994	1.73e-10	5.01e-09
ENSG00000178104	802	770	729	515	530	516	PDE4DIP	phosphodiesterase 4D interacting protein [Source:HGNC Symbol;Acc:15580]	-0.54978	1.8e-10	5.21e-09
ENSG00000167384	414	438	413	202	202	199	ZNF180	zinc finger protein 180 [Source:HGNC Symbol;Acc:12970]	-1.09315	2e-10	5.77e-09
ENSG00000139438	47	44	36	103	89	105	FAM222A	family with sequence similarity 222, member A [Source:HGNC Symbol;Acc:25915]	1.28067	2.22e-10	6.42e-09
ENSG00000126368	37	48	47	110	90	97	NR1D1	nuclear receptor subfamily 1, group D, member 1 [Source:HGNC Symbol;Acc:7962]	1.21728	2.32e-10	6.68e-09
ENSG00000180611	244	223	236	116	146	135	MB21D2	Mab-21 domain containing 2 [Source:HGNC Symbol;Acc:30438]	-0.859526	2.39e-10	6.87e-09
ENSG00000186918	473	436	365	245	260	217	ZNF395	zinc finger protein 395 [Source:HGNC Symbol;Acc:18737]	-0.802681	2.59e-10	7.44e-09
ENSG00000100558	754	727	784	1008	1065	1091	PLEK2	pleckstrin 2 [Source:HGNC Symbol;Acc:19238]	0.499336	2.61e-10	7.48e-09
ENSG00000010278	1801	1687	1757	2883	2584	2709	CD9	CD9 molecule [Source:HGNC Symbol;Acc:1709]	0.649492	2.65e-10	7.59e-09
ENSG00000164111	10326	9626	9986	13558	14227	14771	ANXA5	annexin A5 [Source:HGNC Symbol;Acc:543]	0.498989	2.66e-10	7.62e-09
ENSG00000117748	1655	1607	1549	1101	1188	1124	RPA2	replication protein A2, 32kDa [Source:HGNC Symbol;Acc:10290]	-0.503251	2.72e-10	7.76e-09
ENSG00000155265	79	75	70	155	155	173	GOLGA7B	golgin A7 family, member B [Source:HGNC Symbol;Acc:31668]	1.11463	2.77e-10	7.9e-09
ENSG00000177666	694	836	860	1347	1361	1454	PNPLA2	patatin-like phospholipase domain containing 2 [Source:HGNC Symbol;Acc:30802]	0.833838	2.88e-10	8.19e-09
ENSG00000232367	14	19	21	76	59	79	TAP1	transporter 1, ATP-binding cassette, sub-family B (MDR/TAP) [Source:HGNC Symbol;Acc:43]	2.03188	3.13e-10	8.89e-09
ENSG00000182093	262	267	301	165	171	162	WRB	tryptophan rich basic protein [Source:HGNC Symbol;Acc:12790]	-0.739501	3.15e-10	8.95e-09
ENSG00000163121	4	2	9	66	54	63	NEURL3	neuralized E3 ubiquitin protein ligase 3 [Source:HGNC Symbol;Acc:25162]	3.59206	3.38e-10	9.58e-09
ENSG00000111445	1409	1338	1446	1050	1122	1093	RFC5	replication factor C (activator 1) 5, 36.5kDa [Source:HGNC Symbol;Acc:9973]	-0.382031	3.41e-10	9.65e-09
ENSG00000115616	218	191	214	381	322	385	SLC9A2	solute carrier family 9, subfamily A (NHE2, cation proton antiporter 2), member 2 [Source:HGNC Symbol;Acc:11072]	0.850502	3.52e-10	9.95e-09
ENSG00000116871	454	581	605	1101	1305	1307	MAP7D1	MAP7 domain containing 1 [Source:HGNC Symbol;Acc:25514]	1.2337	3.54e-10	9.98e-09
ENSG00000173327	1076	1392	1344	2117	2151	2208	MAP3K11	mitogen-activated protein kinase kinase kinase 11 [Source:HGNC Symbol;Acc:6850]	0.797312	3.64e-10	1.03e-08
ENSG00000138386	1898	1795	2122	3455	3320	3055	NAB1	NGFI-A binding protein 1 (EGR1 binding protein 1) [Source:HGNC Symbol;Acc:7626]	0.722161	3.87e-10	1.09e-08
ENSG00000206297	14	19	21	76	59	79	TAP1	transporter 1, ATP-binding cassette, sub-family B (MDR/TAP) [Source:HGNC Symbol;Acc:43]	2.00731	3.88e-10	1.09e-08
ENSG00000226173	14	19	21	76	59	79	TAP1	transporter 1, ATP-binding cassette, sub-family B (MDR/TAP) [Source:HGNC Symbol;Acc:43]	2.00731	3.88e-10	1.09e-08
ENSG00000136379	753	711	701	449	510	487	ABHD17C	abhydrolase domain containing 17C [Source:HGNC Symbol;Acc:26925]	-0.654806	3.96e-10	1.11e-08
ENSG00000145604	2206	2231	2343	1708	1696	1436	SKP2	S-phase kinase-associated protein 2, E3 ubiquitin protein ligase [Source:HGNC Symbol;Acc:10901]	-0.528843	4.04e-10	1.13e-08
ENSG00000057019	16370	16239	16403	29166	28249	27638	DCBLD2	discoidin, CUB and LCCL domain containing 2 [Source:HGNC Symbol;Acc:24627]	0.763751	4.12e-10	1.15e-08
ENSG00000116604	156	167	152	271	267	276	MEF2D	myocyte enhancer factor 2D [Source:HGNC Symbol;Acc:6997]	0.797918	4.22e-10	1.18e-08
ENSG00000168661	190	187	153	62	69	54	ZNF30	zinc finger protein 30 [Source:HGNC Symbol;Acc:13090]	-1.55082	4.65e-10	1.3e-08
ENSG00000227816	12	19	23	83	60	76	TAP1	transporter 1, ATP-binding cassette, sub-family B (MDR/TAP) [Source:HGNC Symbol;Acc:43]	2.05899	4.9e-10	1.36e-08
ENSG00000230705	12	19	23	83	60	76	TAP1	transporter 1, ATP-binding cassette, sub-family B (MDR/TAP) [Source:HGNC Symbol;Acc:43]	2.05899	4.9e-10	1.36e-08
ENSG00000088876	158	134	163	76	67	91	ZNF343	zinc finger protein 343 [Source:HGNC Symbol;Acc:16017]	-0.946751	5.29e-10	1.47e-08
ENSG00000185507	770	950	1043	1542	1597	1674	IRF7	interferon regulatory factor 7 [Source:HGNC Symbol;Acc:6122]	0.846347	6e-10	1.66e-08
ENSG00000204634	565	555	570	768	784	733	TBC1D8	TBC1 domain family, member 8 (with GRAM domain) [Source:HGNC Symbol;Acc:17791]	0.464912	5.98e-10	1.66e-08
ENSG00000122877	14	20	33	79	111	71	EGR2	early growth response 2 [Source:HGNC Symbol;Acc:3239]	1.91352	6.35e-10	1.75e-08
ENSG00000177971	1566	1483	1473	1016	1158	1156	IMP3	IMP3, U3 small nucleolar ribonucleoprotein, homolog (yeast) [Source:HGNC Symbol;Acc:14497]	-0.438895	6.85e-10	1.89e-08
ENSG00000143772	141	164	135	66	64	85	ITPKB	inositol-trisphosphate 3-kinase B [Source:HGNC Symbol;Acc:6179]	-1.03529	6.94e-10	1.91e-08
ENSG00000108669	278	300	332	511	473	468	CYTH1	cytohesin 1 [Source:HGNC Symbol;Acc:9501]	0.7215	7.06e-10	1.94e-08
ENSG00000116560	7704	7239	6755	10370	10145	10402	SFPQ	splicing factor proline/glutamine-rich [Source:HGNC Symbol;Acc:10774]	0.522064	7.12e-10	1.95e-08
ENSG00000129667	207	261	216	374	401	400	RHBDF2	rhomboid 5 homolog 2 (Drosophila) [Source:HGNC Symbol;Acc:20788]	0.804688	7.26e-10	1.99e-08
ENSG00000117899	1889	1817	1857	1412	1516	1434	MESDC2	mesoderm development candidate 2 [Source:HGNC Symbol;Acc:13520]	-0.372348	7.42e-10	2.03e-08
ENSG00000060138	3489	3506	3330	4063	4171	4084	YBX3	Y box binding protein 3 [Source:HGNC Symbol;Acc:2428]	0.252292	7.61e-10	2.08e-08
ENSG00000144120	264	293	281	137	169	142	TMEM177	transmembrane protein 177 [Source:HGNC Symbol;Acc:28143]	-0.861638	7.7e-10	2.1e-08
ENSG00000181938	591	632	566	396	420	409	GINS3	GINS complex subunit 3 (Psf3 homolog) [Source:HGNC Symbol;Acc:25851]	-0.548016	8.14e-10	2.22e-08
ENSG00000122515	490	585	517	805	740	827	ZMIZ2	zinc finger, MIZ-type containing 2 [Source:HGNC Symbol;Acc:22229]	0.618232	8.43e-10	2.3e-08
ENSG00000117519	325	343	315	473	546	497	CNN3	calponin 3, acidic [Source:HGNC Symbol;Acc:2157]	0.610312	1e-09	2.73e-08
ENSG00000168569	601	552	610	310	367	347	TMEM223	transmembrane protein 223 [Source:HGNC Symbol;Acc:28464]	-0.759394	1.03e-09	2.78e-08
ENSG00000180938	318	321	308	119	100	108	ZNF572	zinc finger protein 572 [Source:HGNC Symbol;Acc:26758]	-1.47676	1.02e-09	2.78e-08
ENSG00000185920	130	147	133	75	69	50	PTCH1	patched 1 [Source:HGNC Symbol;Acc:9585]	-1.04539	1.03e-09	2.79e-08
ENSG00000169403	42	53	54	112	89	97	PTAFR	platelet-activating factor receptor [Source:HGNC Symbol;Acc:9582]	1.01911	1.05e-09	2.85e-08
ENSG00000084636	700	798	762	1059	1065	1117	COL16A1	collagen, type XVI, alpha 1 [Source:HGNC Symbol;Acc:2193]	0.549536	1.14e-09	3.07e-08
ENSG00000130066	646	635	645	1247	1053	1086	SAT1	spermidine/spermine N1-acetyltransferase 1 [Source:HGNC Symbol;Acc:10540]	0.809338	1.14e-09	3.08e-08
ENSG00000139514	7131	7747	7176	9592	9170	9336	SLC7A1	solute carrier family 7 (cationic amino acid transporter, y+ system), member 1 [Source:HGNC Symbol;Acc:11057]	0.362857	1.14e-09	3.08e-08
ENSG00000165105	2872	2827	2976	3940	4035	3913	RASEF	RAS and EF-hand domain containing [Source:HGNC Symbol;Acc:26464]	0.449272	1.15e-09	3.09e-08
ENSG00000105991	71	54	63	23	20	19	HOXA1	homeobox A1 [Source:HGNC Symbol;Acc:5099]	-1.59987	1.22e-09	3.26e-08
ENSG00000111696	614	644	675	992	937	921	NT5DC3	5'-nucleotidase domain containing 3 [Source:HGNC Symbol;Acc:30826]	0.537619	1.21e-09	3.26e-08
ENSG00000137076	2898	3046	2910	3822	3749	3855	TLN1	talin 1 [Source:HGNC Symbol;Acc:11845]	0.391176	1.26e-09	3.37e-08
ENSG00000174446	718	676	639	452	429	414	SNAPC5	small nuclear RNA activating complex, polypeptide 5, 19kDa [Source:HGNC Symbol;Acc:15484]	-0.64554	1.28e-09	3.42e-08
ENSG00000147130	427	454	417	247	266	261	ZMYM3	zinc finger, MYM-type 3 [Source:HGNC Symbol;Acc:13054]	-0.732443	1.31e-09	3.48e-08
ENSG00000168887	976	904	989	676	688	702	C2orf68	chromosome 2 open reading frame 68 [Source:HGNC Symbol;Acc:34353]	-0.456868	1.3e-09	3.48e-08
ENSG00000168003	4326	4321	4220	6272	6590	6589	SLC3A2	solute carrier family 3 (amino acid transporter heavy chain), member 2 [Source:HGNC Symbol;Acc:11026]	0.611428	1.32e-09	3.51e-08
ENSG00000111110	607	554	547	405	392	394	PPM1H	protein phosphatase, Mg2+/Mn2+ dependent, 1H [Source:HGNC Symbol;Acc:18583]	-0.526645	1.38e-09	3.67e-08
ENSG00000105559	152	167	169	258	294	314	PLEKHA4	pleckstrin homology domain containing, family A (phosphoinositide binding specific) member 4 [Source:HGNC Symbol;Acc:14339]	0.860191	1.46e-09	3.88e-08
ENSG00000082458	2264	2214	2104	1595	1575	1593	DLG3	discs, large homolog 3 (Drosophila) [Source:HGNC Symbol;Acc:2902]	-0.451093	1.57e-09	4.15e-08
ENSG00000125846	176	207	188	107	101	87	ZNF133	zinc finger protein 133 [Source:HGNC Symbol;Acc:12917]	-0.958485	1.57e-09	4.15e-08
ENSG00000136940	624	602	701	440	454	443	PDCL	phosducin-like [Source:HGNC Symbol;Acc:8770]	-0.551075	1.61e-09	4.26e-08
ENSG00000012171	328	365	390	740	639	736	SEMA3B	sema domain, immunoglobulin domain (Ig), short basic domain, secreted, (semaphorin) 3B [Source:HGNC Symbol;Acc:10724]	1.05524	1.62e-09	4.28e-08
ENSG00000183260	26	37	19	84	76	93	ABHD16B	abhydrolase domain containing 16B [Source:HGNC Symbol;Acc:16128]	1.65879	1.68e-09	4.42e-08
ENSG00000120875	843	813	802	568	637	566	DUSP4	dual specificity phosphatase 4 [Source:HGNC Symbol;Acc:3070]	-0.478564	1.71e-09	4.49e-08
ENSG00000243667	381	376	345	218	221	261	WDR92	WD repeat domain 92 [Source:HGNC Symbol;Acc:25176]	-0.666934	1.72e-09	4.51e-08
ENSG00000020256	338	356	278	185	203	188	ZFP64	ZFP64 zinc finger protein [Source:HGNC Symbol;Acc:15940]	-0.798689	1.74e-09	4.57e-08
ENSG00000167522	1728	1889	1665	2400	2423	2460	ANKRD11	ankyrin repeat domain 11 [Source:HGNC Symbol;Acc:21316]	0.505173	1.75e-09	4.59e-08
ENSG00000256235	205	202	235	131	126	117	SMIM3	small integral membrane protein 3 [Source:HGNC Symbol;Acc:30248]	-0.768673	1.78e-09	4.66e-08
ENSG00000137309	10445	11834	12053	16401	17433	17728	HMGA1	high mobility group AT-hook 1 [Source:HGNC Symbol;Acc:5010]	0.611927	1.9e-09	4.96e-08
ENSG00000135083	175	168	188	99	102	92	CCNJL	cyclin J-like [Source:HGNC Symbol;Acc:25876]	-0.881003	1.92e-09	5e-08
ENSG00000157601	1585	1550	1500	2012	1976	2010	MX1	myxovirus (influenza virus) resistance 1, interferon-inducible protein p78 (mouse) [Source:HGNC Symbol;Acc:7532]	0.40194	2.11e-09	5.49e-08
ENSG00000143971	335	338	325	106	125	121	ETAA1	Ewing tumor-associated antigen 1 [Source:HGNC Symbol;Acc:24648]	-1.6409	2.37e-09	6.15e-08
ENSG00000183840	243	222	234	113	129	145	GPR39	G protein-coupled receptor 39 [Source:HGNC Symbol;Acc:4496]	-0.837954	2.4e-09	6.24e-08
ENSG00000163516	379	375	353	201	245	228	ANKZF1	ankyrin repeat and zinc finger domain containing 1 [Source:HGNC Symbol;Acc:25527]	-0.700615	2.45e-09	6.37e-08
ENSG00000105397	473	570	585	894	780	907	TYK2	tyrosine kinase 2 [Source:HGNC Symbol;Acc:12440]	0.710492	2.51e-09	6.5e-08
ENSG00000197894	3430	3066	3343	2491	2634	2441	ADH5	alcohol dehydrogenase 5 (class III), chi polypeptide [Source:HGNC Symbol;Acc:253]	-0.407629	2.72e-09	7.03e-08
ENSG00000196214	715	652	645	348	387	328	ZNF766	zinc finger protein 766 [Source:HGNC Symbol;Acc:28063]	-0.962738	2.81e-09	7.26e-08
ENSG00000164051	325	278	353	159	185	203	CCDC51	coiled-coil domain containing 51 [Source:HGNC Symbol;Acc:25714]	-0.771848	2.84e-09	7.32e-08
ENSG00000168411	2753	2652	2539	2106	2161	2144	RFWD3	ring finger and WD repeat domain 3 [Source:HGNC Symbol;Acc:25539]	-0.306433	2.9e-09	7.47e-08
ENSG00000136068	13619	14169	13145	20904	18803	19946	FLNB	filamin B, beta [Source:HGNC Symbol;Acc:3755]	0.569576	3.03e-09	7.8e-08
ENSG00000161542	504	470	483	327	359	344	PRPSAP1	phosphoribosyl pyrophosphate synthetase-associated protein 1 [Source:HGNC Symbol;Acc:9466]	-0.509761	3.05e-09	7.83e-08
ENSG00000198960	246	264	245	135	158	134	ARMCX6	armadillo repeat containing, X-linked 6 [Source:HGNC Symbol;Acc:26094]	-0.836602	3.09e-09	7.94e-08
ENSG00000212907	33	42	39	101	61	105	MT-ND4L	mitochondrially encoded NADH dehydrogenase 4L [Source:HGNC Symbol;Acc:7460]	1.31006	3.14e-09	8.05e-08
ENSG00000101138	740	826	764	483	549	428	CSTF1	cleavage stimulation factor, 3' pre-RNA, subunit 1, 50kDa [Source:HGNC Symbol;Acc:2483]	-0.767379	3.17e-09	8.1e-08
ENSG00000137259	1114	1138	1229	635	720	681	HIST1H2AB	histone cluster 1, H2ab [Source:HGNC Symbol;Acc:4734]	-0.751989	3.17e-09	8.1e-08
ENSG00000203697	497	520	484	751	671	811	CAPN8	calpain 8 [Source:HGNC Symbol;Acc:1485]	0.614634	3.17e-09	8.1e-08
ENSG00000188735	505	596	589	911	798	916	TMEM120B	transmembrane protein 120B [Source:HGNC Symbol;Acc:32008]	0.6677	3.19e-09	8.15e-08
ENSG00000196923	165	167	159	292	304	319	PDLIM7	PDZ and LIM domain 7 (enigma) [Source:HGNC Symbol;Acc:22958]	0.976169	3.24e-09	8.24e-08
ENSG00000178988	1379	1245	1409	929	952	948	MRFAP1L1	Morf4 family associated protein 1-like 1 [Source:HGNC Symbol;Acc:28796]	-0.520922	3.29e-09	8.36e-08
ENSG00000144746	1339	1293	1446	983	1083	901	ARL6IP5	ADP-ribosylation-like factor 6 interacting protein 5 [Source:HGNC Symbol;Acc:16937]	-0.517893	3.33e-09	8.46e-08
ENSG00000198788	17	15	17	97	60	78	MUC2	mucin 2, oligomeric mucus/gel-forming [Source:HGNC Symbol;Acc:7512]	2.34551	3.51e-09	8.89e-08
ENSG00000155729	237	239	234	142	138	141	KCTD18	potassium channel tetramerization domain containing 18 [Source:HGNC Symbol;Acc:26446]	-0.741887	3.66e-09	9.26e-08
ENSG00000260121	59	63	63	188	102	198			1.46737	4.2e-09	1.06e-07
ENSG00000166821	361	342	322	196	212	203	PEX11A	peroxisomal biogenesis factor 11 alpha [Source:HGNC Symbol;Acc:8852]	-0.792219	4.29e-09	1.08e-07
ENSG00000108511	239	314	272	141	117	158	HOXB6	homeobox B6 [Source:HGNC Symbol;Acc:5117]	-0.935018	4.42e-09	1.11e-07
ENSG00000103343	147	144	123	55	60	72	ZNF174	zinc finger protein 174 [Source:HGNC Symbol;Acc:12963]	-1.12712	4.69e-09	1.18e-07
ENSG00000197024	738	711	613	418	446	402	ZNF398	zinc finger protein 398 [Source:HGNC Symbol;Acc:18373]	-0.725638	4.71e-09	1.18e-07
ENSG00000153487	522	559	573	750	756	730	ING1	inhibitor of growth family, member 1 [Source:HGNC Symbol;Acc:6062]	0.4243	4.81e-09	1.21e-07
ENSG00000216819	28	25	32	96	107	114	TUBB2BP1	tubulin, beta 2B class IIb pseudogene 1 [Source:HGNC Symbol;Acc:42332]	1.88234	4.94e-09	1.24e-07
ENSG00000263002	338	286	281	167	128	152	ZNF234	zinc finger protein 234 [Source:HGNC Symbol;Acc:13027]	-1.02577	5.01e-09	1.25e-07
ENSG00000160051	187	210	159	76	99	97	IQCC	IQ motif containing C [Source:HGNC Symbol;Acc:25545]	-1.02538	5.04e-09	1.26e-07
ENSG00000232533	63	50	60	152	137	127			1.27401	5.1e-09	1.27e-07
ENSG00000007392	454	423	437	637	538	618	LUC7L	LUC7-like (S. cerevisiae) [Source:HGNC Symbol;Acc:6723]	0.480269	5.16e-09	1.29e-07
ENSG00000086062	842	904	854	1094	1142	1153	B4GALT1	UDP-Gal:betaGlcNAc beta 1,4- galactosyltransferase, polypeptide 1 [Source:HGNC Symbol;Acc:924]	0.397096	5.48e-09	1.37e-07
ENSG00000140464	207	276	246	402	372	387	PML	promyelocytic leukemia [Source:HGNC Symbol;Acc:9113]	0.722911	6.1e-09	1.52e-07
ENSG00000142227	47	44	39	99	116	92	EMP3	epithelial membrane protein 3 [Source:HGNC Symbol;Acc:3335]	1.27351	6.21e-09	1.54e-07
ENSG00000119927	550	554	519	297	328	269	GPAM	glycerol-3-phosphate acyltransferase, mitochondrial [Source:HGNC Symbol;Acc:24865]	-0.906439	6.56e-09	1.63e-07
ENSG00000154978	4184	4349	4376	3452	3836	3539	VOPP1	vesicular, overexpressed in cancer, prosurvival protein 1 [Source:HGNC Symbol;Acc:34518]	-0.265437	6.56e-09	1.63e-07
ENSG00000125753	5780	6135	5877	8175	8625	8878	VASP	vasodilator-stimulated phosphoprotein [Source:HGNC Symbol;Acc:12652]	0.553002	6.84e-09	1.69e-07
ENSG00000171492	873	805	810	606	605	591	LRRC8D	leucine rich repeat containing 8 family, member D [Source:HGNC Symbol;Acc:16992]	-0.513706	6.98e-09	1.73e-07
ENSG00000014919	1215	1210	1265	965	933	892	COX15	cytochrome c oxidase assembly homolog 15 (yeast) [Source:HGNC Symbol;Acc:2263]	-0.425898	7.11e-09	1.76e-07
ENSG00000013441	722	675	682	1691	1614	1541	CLK1	CDC-like kinase 1 [Source:HGNC Symbol;Acc:2068]	1.19416	7.18e-09	1.77e-07
ENSG00000182795	1182	1144	1191	1528	1447	1585	C1orf116	chromosome 1 open reading frame 116 [Source:HGNC Symbol;Acc:28667]	0.409655	7.37e-09	1.82e-07
ENSG00000160326	61	69	63	153	142	140	SLC2A6	solute carrier family 2 (facilitated glucose transporter), member 6 [Source:HGNC Symbol;Acc:11011]	1.25736	7.54e-09	1.85e-07
ENSG00000163067	146	164	115	63	70	76	ZNF2	zinc finger protein 2 [Source:HGNC Symbol;Acc:12991]	-0.969794	7.52e-09	1.85e-07
ENSG00000197381	205	218	201	302	312	322	ADARB1	adenosine deaminase, RNA-specific, B1 [Source:HGNC Symbol;Acc:226]	0.634985	7.56e-09	1.85e-07
ENSG00000261768	61	69	63	153	142	140	SLC2A6	solute carrier family 2 (facilitated glucose transporter), member 6 [Source:HGNC Symbol;Acc:11011]	1.25736	7.54e-09	1.85e-07
ENSG00000112365	500	478	550	333	345	350	ZBTB24	zinc finger and BTB domain containing 24 [Source:HGNC Symbol;Acc:21143]	-0.574409	7.81e-09	1.91e-07
ENSG00000150455	155	184	152	94	95	87	TIRAP	toll-interleukin 1 receptor (TIR) domain containing adaptor protein [Source:HGNC Symbol;Acc:17192]	-0.854158	7.8e-09	1.91e-07
ENSG00000235941	4863	5382	6275	8571	8781	8946	HSPA1A	heat shock 70kDa protein 1A [Source:HGNC Symbol;Acc:5232]	0.688605	7.87e-09	1.92e-07
ENSG00000168792	686	643	685	432	457	429	ABHD15	abhydrolase domain containing 15 [Source:HGNC Symbol;Acc:26971]	-0.607206	8.19e-09	2e-07
ENSG00000138794	727	705	685	519	469	512	CASP6	caspase 6, apoptosis-related cysteine peptidase [Source:HGNC Symbol;Acc:1507]	-0.513217	8.33e-09	2.03e-07
ENSG00000114648	559	505	496	717	737	706	KLHL18	kelch-like family member 18 [Source:HGNC Symbol;Acc:29120]	0.491528	8.66e-09	2.11e-07
ENSG00000120913	61	93	79	160	173	222	PDLIM2	PDZ and LIM domain 2 (mystique) [Source:HGNC Symbol;Acc:13992]	1.28594	8.89e-09	2.16e-07
ENSG00000144659	446	445	441	266	274	285	SLC25A38	solute carrier family 25, member 38 [Source:HGNC Symbol;Acc:26054]	-0.677326	8.9e-09	2.16e-07
ENSG00000168140	28	45	30	118	93	92	VASN	vasorin [Source:HGNC Symbol;Acc:18517]	1.58747	9e-09	2.18e-07
ENSG00000130202	4124	4519	4594	6548	7149	7256	PVRL2	poliovirus receptor-related 2 (herpesvirus entry mediator B) [Source:HGNC Symbol;Acc:9707]	0.692419	9.16e-09	2.22e-07
ENSG00000168066	2680	2642	2611	3337	3385	3606	SF1	splicing factor 1 [Source:HGNC Symbol;Acc:12950]	0.387548	9.21e-09	2.23e-07
ENSG00000224287	469	435	437	266	297	271	MSL3P1	male-specific lethal 3 homolog (Drosophila) pseudogene 1 [Source:HGNC Symbol;Acc:17837]	-0.719974	9.33e-09	2.25e-07
ENSG00000104825	487	560	588	868	928	997	NFKBIB	nuclear factor of kappa light polypeptide gene enhancer in B-cells inhibitor, beta [Source:HGNC Symbol;Acc:7798]	0.792492	1e-08	2.41e-07
ENSG00000175550	1350	1380	1250	2027	2115	2376	DRAP1	DR1-associated protein 1 (negative cofactor 2 alpha) [Source:HGNC Symbol;Acc:3019]	0.771638	1.01e-08	2.42e-07
ENSG00000196378	82	70	57	18	30	26	ZNF34	zinc finger protein 34 [Source:HGNC Symbol;Acc:13098]	-1.48337	1.01e-08	2.42e-07
ENSG00000135604	0	1	0	52	45	41	STX11	syntaxin 11 [Source:HGNC Symbol;Acc:11429]	7.01405	1.16e-08	2.79e-07
ENSG00000152382	402	357	434	241	280	241	TADA1	transcriptional adaptor 1 [Source:HGNC Symbol;Acc:30631]	-0.701967	1.18e-08	2.84e-07
ENSG00000175215	1731	1831	1870	1342	1370	1376	CTDSP2	CTD (carboxy-terminal domain, RNA polymerase II, polypeptide A) small phosphatase 2 [Source:HGNC Symbol;Acc:17077]	-0.398794	1.19e-08	2.86e-07
ENSG00000099992	187	213	242	369	407	424	TBC1D10A	TBC1 domain family, member 10A [Source:HGNC Symbol;Acc:23609]	0.926138	1.2e-08	2.88e-07
ENSG00000116205	172	177	181	89	83	100	TCEANC2	transcription elongation factor A (SII) N-terminal and central domain containing 2 [Source:HGNC Symbol;Acc:26494]	-0.969369	1.24e-08	2.97e-07
ENSG00000100219	4681	5137	4243	6616	6603	6800	XBP1	X-box binding protein 1 [Source:HGNC Symbol;Acc:12801]	0.513416	1.3e-08	3.1e-07
ENSG00000104413	3125	2947	2935	2257	2271	1967	ESRP1	epithelial splicing regulatory protein 1 [Source:HGNC Symbol;Acc:25966]	-0.524065	1.35e-08	3.22e-07
ENSG00000160223	126	147	162	281	270	254	ICOSLG	inducible T-cell co-stimulator ligand [Source:HGNC Symbol;Acc:17087]	0.897353	1.41e-08	3.36e-07
ENSG00000125844	2809	2876	2532	3847	3851	4245	RRBP1	ribosome binding protein 1 [Source:HGNC Symbol;Acc:10448]	0.587875	1.48e-08	3.53e-07
ENSG00000125657	20	17	17	58	58	44	TNFSF9	tumor necrosis factor (ligand) superfamily, member 9 [Source:HGNC Symbol;Acc:11939]	1.52852	1.49e-08	3.54e-07
ENSG00000010404	1450	1548	1609	2071	1969	2008	IDS	iduronate 2-sulfatase [Source:HGNC Symbol;Acc:5389]	0.396244	1.52e-08	3.6e-07
ENSG00000177613	1089	995	969	660	721	740	CSTF2T	cleavage stimulation factor, 3' pre-RNA, subunit 2, 64kDa, tau variant [Source:HGNC Symbol;Acc:17086]	-0.527687	1.58e-08	3.74e-07
ENSG00000173575	2382	2230	2128	3688	3044	3222	CHD2	chromodomain helicase DNA binding protein 2 [Source:HGNC Symbol;Acc:1917]	0.583651	1.66e-08	3.94e-07
ENSG00000103067	762	838	805	529	556	556	ESRP2	epithelial splicing regulatory protein 2 [Source:HGNC Symbol;Acc:26152]	-0.528049	1.67e-08	3.95e-07
ENSG00000134668	4	3	3	30	28	26	SPOCD1	SPOC domain containing 1 [Source:HGNC Symbol;Acc:26338]	3.06183	1.67e-08	3.95e-07
ENSG00000138448	5094	4847	5164	9229	9028	8416	ITGAV	integrin, alpha V [Source:HGNC Symbol;Acc:6150]	0.769435	1.69e-08	3.97e-07
ENSG00000103429	1726	1658	1728	1336	1453	1411	BFAR	bifunctional apoptosis regulator [Source:HGNC Symbol;Acc:17613]	-0.301773	1.72e-08	4.05e-07
ENSG00000154920	184	157	195	111	101	99	EME1	essential meiotic structure-specific endonuclease 1 [Source:HGNC Symbol;Acc:24965]	-0.767854	1.73e-08	4.07e-07
ENSG00000254369	101	101	86	29	40	40	HOXA-AS3	HOXA cluster antisense RNA 3 [Source:HGNC Symbol;Acc:43748]	-1.40227	1.75e-08	4.12e-07
ENSG00000171792	672	662	662	491	498	441	RHNO1	RAD9-HUS1-RAD1 interacting nuclear orphan 1 [Source:HGNC Symbol;Acc:28206]	-0.480657	1.81e-08	4.24e-07
ENSG00000197142	6976	6489	6324	7965	8565	8335	ACSL5	acyl-CoA synthetase long-chain family member 5 [Source:HGNC Symbol;Acc:16526]	0.331252	1.85e-08	4.33e-07
ENSG00000140105	2274	2141	2134	2792	2828	2878	WARS	tryptophanyl-tRNA synthetase [Source:HGNC Symbol;Acc:12729]	0.379847	1.98e-08	4.64e-07
ENSG00000170631	291	316	305	145	184	187	ZNF16	zinc finger protein 16 [Source:HGNC Symbol;Acc:12947]	-0.828823	2.04e-08	4.76e-07
ENSG00000124641	688	654	673	468	493	502	MED20	mediator complex subunit 20 [Source:HGNC Symbol;Acc:16840]	-0.493962	2.04e-08	4.77e-07
ENSG00000213186	540	567	669	346	339	293	TRIM59	tripartite motif containing 59 [Source:HGNC Symbol;Acc:30834]	-0.962415	2.06e-08	4.79e-07
ENSG00000109321	2333	2351	2337	11091	11059	11246	AREG	amphiregulin [Source:HGNC Symbol;Acc:651]	2.17758	2.07e-08	4.81e-07
ENSG00000179862	21	31	14	64	69	79	CITED4	Cbp/p300-interacting transactivator, with Glu/Asp-rich carboxy-terminal domain, 4 [Source:HGNC Symbol;Acc:18696]	1.72005	2.11e-08	4.91e-07
ENSG00000080819	482	433	513	354	365	347	CPOX	coproporphyrinogen oxidase [Source:HGNC Symbol;Acc:2321]	-0.44166	2.28e-08	5.28e-07
ENSG00000140987	340	300	305	172	212	201	ZSCAN32	zinc finger and SCAN domain containing 32 [Source:HGNC Symbol;Acc:20812]	-0.687713	2.28e-08	5.3e-07
ENSG00000171522	5	4	7	33	26	27	PTGER4	prostaglandin E receptor 4 (subtype EP4) [Source:HGNC Symbol;Acc:9596]	2.51159	2.43e-08	5.63e-07
ENSG00000186665	222	208	215	128	154	146	C17orf58	chromosome 17 open reading frame 58 [Source:HGNC Symbol;Acc:27568]	-0.658837	2.5e-08	5.77e-07
ENSG00000263085	222	208	215	128	154	146	C17orf58	chromosome 17 open reading frame 58 [Source:HGNC Symbol;Acc:27568]	-0.658837	2.5e-08	5.77e-07
ENSG00000173598	10213	10605	11419	5869	5753	4922	NUDT4	nudix (nucleoside diphosphate linked moiety X)-type motif 4 [Source:HGNC Symbol;Acc:8051]	-1.04373	2.53e-08	5.84e-07
ENSG00000135776	669	665	686	502	546	502	ABCB10	ATP-binding cassette, sub-family B (MDR/TAP), member 10 [Source:HGNC Symbol;Acc:41]	-0.44017	2.55e-08	5.87e-07
ENSG00000156860	296	344	288	494	507	512	FBRS	fibrosin [Source:HGNC Symbol;Acc:20442]	0.740974	2.59e-08	5.95e-07
ENSG00000136877	1360	1472	1480	2147	2374	2308	FPGS	folylpolyglutamate synthase [Source:HGNC Symbol;Acc:3824]	0.692692	2.62e-08	6.03e-07
ENSG00000179431	91	120	107	226	228	209	FJX1	four jointed box 1 (Drosophila) [Source:HGNC Symbol;Acc:17166]	1.0677	2.63e-08	6.05e-07
ENSG00000162396	221	220	224	129	134	133	PARS2	prolyl-tRNA synthetase 2, mitochondrial (putative) [Source:HGNC Symbol;Acc:30563]	-0.714557	2.87e-08	6.59e-07
ENSG00000107175	834	856	900	1106	1168	1187	CREB3	cAMP responsive element binding protein 3 [Source:HGNC Symbol;Acc:2347]	0.43921	2.88e-08	6.6e-07
ENSG00000103150	258	235	241	144	154	149	MLYCD	malonyl-CoA decarboxylase [Source:HGNC Symbol;Acc:7150]	-0.744672	2.93e-08	6.7e-07
ENSG00000123444	846	865	844	573	641	619	KBTBD4	kelch repeat and BTB (POZ) domain containing 4 [Source:HGNC Symbol;Acc:23761]	-0.475278	2.94e-08	6.71e-07
ENSG00000125945	465	451	446	267	234	262	ZNF436	zinc finger protein 436 [Source:HGNC Symbol;Acc:20814]	-0.83179	2.96e-08	6.76e-07
ENSG00000228964	0	0	0	34	26	10	HLA-B	major histocompatibility complex, class I, B [Source:HGNC Symbol;Acc:4932]	6.95309	2.97e-08	6.78e-07
ENSG00000167995	111	88	72	198	140	210	BEST1	bestrophin 1 [Source:HGNC Symbol;Acc:12703]	1.08019	3e-08	6.83e-07
ENSG00000160789	15276	18187	18627	25235	27457	28057	LMNA	lamin A/C [Source:HGNC Symbol;Acc:6636]	0.651626	3.03e-08	6.89e-07
ENSG00000198763	74	76	69	267	116	223	MT-ND2	mitochondrially encoded NADH dehydrogenase 2 [Source:HGNC Symbol;Acc:7456]	1.53299	3.05e-08	6.93e-07
ENSG00000167380	408	409	365	210	249	223	ZNF226	zinc finger protein 226 [Source:HGNC Symbol;Acc:13019]	-0.835077	3.1e-08	7.04e-07
ENSG00000118194	3	3	6	38	16	33	TNNT2	troponin T type 2 (cardiac) [Source:HGNC Symbol;Acc:11949]	2.92896	3.13e-08	7.09e-07
ENSG00000137285	6	11	16	89	87	106	TUBB2B	tubulin, beta 2B class IIb [Source:HGNC Symbol;Acc:30829]	3.10159	3.2e-08	7.24e-07
ENSG00000138640	439	379	414	261	325	266	FAM13A	family with sequence similarity 13, member A [Source:HGNC Symbol;Acc:19367]	-0.606507	3.2e-08	7.24e-07
ENSG00000198863	697	654	576	363	456	424	RUNDC1	RUN domain containing 1 [Source:HGNC Symbol;Acc:25418]	-0.621011	3.29e-08	7.43e-07
ENSG00000013392	65	72	59	28	32	26	RWDD2A	RWD domain containing 2A [Source:HGNC Symbol;Acc:21385]	-1.22671	3.3e-08	7.44e-07
ENSG00000105514	542	567	526	363	427	371	RAB3D	RAB3D, member RAS oncogene family [Source:HGNC Symbol;Acc:9779]	-0.537537	3.51e-08	7.9e-07
ENSG00000134262	405	384	374	250	253	291	AP4B1	adaptor-related protein complex 4, beta 1 subunit [Source:HGNC Symbol;Acc:572]	-0.525112	3.53e-08	7.94e-07
ENSG00000150594	127	130	149	59	56	46	ADRA2A	adrenoceptor alpha 2A [Source:HGNC Symbol;Acc:281]	-1.36424	3.58e-08	8.05e-07
ENSG00000122644	965	987	1040	457	477	470	ARL4A	ADP-ribosylation factor-like 4A [Source:HGNC Symbol;Acc:695]	-1.17346	3.6e-08	8.08e-07
ENSG00000115325	136	153	148	63	59	79	DOK1	docking protein 1, 62kDa (downstream of tyrosine kinase 1) [Source:HGNC Symbol;Acc:2990]	-1.0695	3.64e-08	8.15e-07
ENSG00000186212	515	529	487	880	827	821	SOWAHB	sosondowah ankyrin repeat domain family member B [Source:HGNC Symbol;Acc:32958]	0.714558	3.72e-08	8.34e-07
ENSG00000177721	114	118	109	52	44	49	ANXA2R	annexin A2 receptor [Source:HGNC Symbol;Acc:33463]	-1.18026	3.86e-08	8.63e-07
ENSG00000113048	2328	2228	2250	1775	1875	1845	MRPS27	mitochondrial ribosomal protein S27 [Source:HGNC Symbol;Acc:14512]	-0.322528	3.93e-08	8.78e-07
ENSG00000197153	2703	2689	2946	1582	1733	1843	HIST1H3J	histone cluster 1, H3j [Source:HGNC Symbol;Acc:4774]	-0.65268	4e-08	8.93e-07
ENSG00000112855	875	896	898	546	675	616	HARS2	histidyl-tRNA synthetase 2, mitochondrial [Source:HGNC Symbol;Acc:4817]	-0.541531	4.06e-08	9.06e-07
ENSG00000141179	496	513	557	327	363	339	PCTP	phosphatidylcholine transfer protein [Source:HGNC Symbol;Acc:8752]	-0.661087	4.1e-08	9.13e-07
ENSG00000160993	262	286	262	118	136	123	ALKBH4	alkB, alkylation repair homolog 4 (E. coli) [Source:HGNC Symbol;Acc:21900]	-1.06268	4.34e-08	9.65e-07
ENSG00000120334	555	550	595	350	369	356	CENPL	centromere protein L [Source:HGNC Symbol;Acc:17879]	-0.703171	4.38e-08	9.72e-07
ENSG00000245904	5	5	3	24	24	36			2.78147	4.43e-08	9.83e-07
ENSG00000178386	142	136	132	50	64	63	ZNF223	zinc finger protein 223 [Source:HGNC Symbol;Acc:13016]	-1.22828	4.47e-08	9.91e-07
ENSG00000198690	852	729	737	530	497	519	FAN1	FANCD2/FANCI-associated nuclease 1 [Source:HGNC Symbol;Acc:29170]	-0.579903	4.5e-08	9.95e-07
ENSG00000105443	2865	2760	2740	4016	3994	4197	CYTH2	cytohesin 2 [Source:HGNC Symbol;Acc:9502]	0.58107	4.68e-08	1.03e-06
ENSG00000254837	99	104	85	35	34	28			-1.69762	4.66e-08	1.03e-06
ENSG00000103196	52	39	53	98	93	85	CRISPLD2	cysteine-rich secretory protein LCCL domain containing 2 [Source:HGNC Symbol;Acc:25248]	0.941848	4.79e-08	1.06e-06
ENSG00000124067	296	334	358	557	481	555	SLC12A4	solute carrier family 12 (potassium/chloride transporter), member 4 [Source:HGNC Symbol;Acc:10913]	0.733955	4.88e-08	1.08e-06
ENSG00000138449	1165	1220	1469	652	693	618	SLC40A1	solute carrier family 40 (iron-regulated transporter), member 1 [Source:HGNC Symbol;Acc:10909]	-1.052	5.07e-08	1.12e-06
ENSG00000155858	503	503	499	348	369	328	LSM11	LSM11, U7 small nuclear RNA associated [Source:HGNC Symbol;Acc:30860]	-0.614789	5.07e-08	1.12e-06
ENSG00000196150	160	119	136	57	75	81	ZNF250	zinc finger protein 250 [Source:HGNC Symbol;Acc:13044]	-0.964835	5.1e-08	1.12e-06
ENSG00000134690	1645	1616	1585	1083	1255	1188	CDCA8	cell division cycle associated 8 [Source:HGNC Symbol;Acc:14629]	-0.437266	5.18e-08	1.14e-06
ENSG00000183647	105	102	90	41	39	48	ZNF530	zinc finger protein 530 [Source:HGNC Symbol;Acc:29297]	-1.18339	5.21e-08	1.14e-06
ENSG00000168994	1170	1204	1238	1539	1622	1634	PXDC1	PX domain containing 1 [Source:HGNC Symbol;Acc:21361]	0.427767	5.29e-08	1.16e-06
ENSG00000068097	313	278	295	175	180	205	HEATR6	HEAT repeat containing 6 [Source:HGNC Symbol;Acc:24076]	-0.647025	5.42e-08	1.19e-06
ENSG00000091947	709	644	798	441	500	462	TMEM101	transmembrane protein 101 [Source:HGNC Symbol;Acc:28653]	-0.617114	5.47e-08	1.19e-06
ENSG00000144824	112	99	92	177	188	167	PHLDB2	pleckstrin homology-like domain, family B, member 2 [Source:HGNC Symbol;Acc:29573]	0.786003	5.46e-08	1.19e-06
ENSG00000105357	3015	4459	3489	6607	6270	6644	MYH14	myosin, heavy chain 14, non-muscle [Source:HGNC Symbol;Acc:23212]	0.882885	5.58e-08	1.21e-06
ENSG00000135093	176	150	155	82	100	77	USP30	ubiquitin specific peptidase 30 [Source:HGNC Symbol;Acc:20065]	-0.933118	5.63e-08	1.22e-06
ENSG00000116514	421	483	459	743	707	700	RNF19B	ring finger protein 19B [Source:HGNC Symbol;Acc:26886]	0.714594	5.68e-08	1.23e-06
ENSG00000225193	7	6	6	42	34	33	RPS12P26	ribosomal protein S12 pseudogene 26 [Source:HGNC Symbol;Acc:36320]	2.66643	5.65e-08	1.23e-06
ENSG00000185338	1	3	6	29	26	33	SOCS1	suppressor of cytokine signaling 1 [Source:HGNC Symbol;Acc:19383]	3.13635	6.08e-08	1.32e-06
ENSG00000092871	1708	1766	1807	2172	2125	2056	RFFL	ring finger and FYVE-like domain containing E3 ubiquitin protein ligase [Source:HGNC Symbol;Acc:24821]	0.254863	6.31e-08	1.36e-06
ENSG00000102096	428	417	473	677	716	729	PIM2	pim-2 oncogene [Source:HGNC Symbol;Acc:8987]	0.681933	6.29e-08	1.36e-06
ENSG00000197782	998	981	979	400	397	335	ZNF780A	zinc finger protein 780A [Source:HGNC Symbol;Acc:27603]	-1.45658	6.34e-08	1.37e-06
ENSG00000164751	850	806	913	585	615	547	PEX2	peroxisomal biogenesis factor 2 [Source:HGNC Symbol;Acc:9717]	-0.619137	6.42e-08	1.39e-06
ENSG00000138172	64	56	75	23	27	27	CALHM2	calcium homeostasis modulator 2 [Source:HGNC Symbol;Acc:23493]	-1.33032	6.58e-08	1.42e-06
ENSG00000139292	579	512	513	365	336	328	LGR5	leucine-rich repeat containing G protein-coupled receptor 5 [Source:HGNC Symbol;Acc:4504]	-0.666381	6.63e-08	1.43e-06
ENSG00000124942	27848	33826	28868	49649	39527	45631	AHNAK	AHNAK nucleoprotein [Source:HGNC Symbol;Acc:347]	0.617658	6.72e-08	1.44e-06
ENSG00000172432	812	861	812	1308	1288	1457	GTPBP2	GTP binding protein 2 [Source:HGNC Symbol;Acc:4670]	0.764385	6.86e-08	1.47e-06
ENSG00000070159	1480	1405	1406	1121	1146	1187	PTPN3	protein tyrosine phosphatase, non-receptor type 3 [Source:HGNC Symbol;Acc:9655]	-0.322504	6.92e-08	1.48e-06
ENSG00000134686	3824	3863	3974	5330	5568	5347	PHC2	polyhomeotic homolog 2 (Drosophila) [Source:HGNC Symbol;Acc:3183]	0.502017	7.01e-08	1.5e-06
ENSG00000160299	918	996	947	1263	1087	1262	PCNT	pericentrin [Source:HGNC Symbol;Acc:16068]	0.36937	7.06e-08	1.51e-06
ENSG00000117013	11	10	14	35	33	47	KCNQ4	potassium voltage-gated channel, KQT-like subfamily, member 4 [Source:HGNC Symbol;Acc:6298]	1.83025	7.52e-08	1.61e-06
ENSG00000145779	1000	996	1103	2483	2239	2110	TNFAIP8	tumor necrosis factor, alpha-induced protein 8 [Source:HGNC Symbol;Acc:17260]	1.05681	7.55e-08	1.61e-06
ENSG00000171608	15	10	4	38	25	37	PIK3CD	phosphatidylinositol-4,5-bisphosphate 3-kinase, catalytic subunit delta [Source:HGNC Symbol;Acc:8977]	1.86233	7.84e-08	1.67e-06
ENSG00000170456	1032	954	990	652	687	698	DENND5B	DENN/MADD domain containing 5B [Source:HGNC Symbol;Acc:28338]	-0.572313	7.9e-08	1.68e-06
ENSG00000186532	396	362	370	228	298	248	SMYD4	SET and MYND domain containing 4 [Source:HGNC Symbol;Acc:21067]	-0.565044	8.02e-08	1.71e-06
ENSG00000138617	161	178	172	110	85	111	PARP16	poly (ADP-ribose) polymerase family, member 16 [Source:HGNC Symbol;Acc:26040]	-0.714413	8.25e-08	1.75e-06
ENSG00000232838	185	194	238	85	142	84	PET117	PET117 homolog (S. cerevisiae) [Source:HGNC Symbol;Acc:40045]	-1.10615	8.3e-08	1.76e-06
ENSG00000181274	322	361	321	225	237	217	FRAT2	frequently rearranged in advanced T-cell lymphomas 2 [Source:HGNC Symbol;Acc:16048]	-0.545284	8.47e-08	1.8e-06
ENSG00000102034	1142	1254	1158	1694	1755	1641	ELF4	E74-like factor 4 (ets domain transcription factor) [Source:HGNC Symbol;Acc:3319]	0.550013	8.54e-08	1.81e-06
ENSG00000165474	1901	1890	1849	2653	2443	2310	GJB2	gap junction protein, beta 2, 26kDa [Source:HGNC Symbol;Acc:4284]	0.377118	8.64e-08	1.83e-06
ENSG00000130827	615	733	734	1059	1035	1236	PLXNA3	plexin A3 [Source:HGNC Symbol;Acc:9101]	0.712828	9.17e-08	1.94e-06
ENSG00000205189	149	152	186	529	405	335	ZBTB10	zinc finger and BTB domain containing 10 [Source:HGNC Symbol;Acc:30953]	1.32348	9.18e-08	1.94e-06
ENSG00000163513	1149	1179	1168	723	716	663	TGFBR2	transforming growth factor, beta receptor II (70/80kDa) [Source:HGNC Symbol;Acc:11773]	-0.767284	9.31e-08	1.96e-06
ENSG00000132334	322	272	291	418	473	451	PTPRE	protein tyrosine phosphatase, receptor type, E [Source:HGNC Symbol;Acc:9669]	0.610628	9.39e-08	1.98e-06
ENSG00000105376	1	5	3	27	18	26	ICAM5	intercellular adhesion molecule 5, telencephalin [Source:HGNC Symbol;Acc:5348]	3.0818	9.91e-08	2.09e-06
ENSG00000165556	17	29	37	8	3	3	CDX2	caudal type homeobox 2 [Source:HGNC Symbol;Acc:1806]	-2.484	1.01e-07	2.11e-06
ENSG00000165376	1528	1431	1436	825	995	893	CLDN2	claudin 2 [Source:HGNC Symbol;Acc:2041]	-0.713629	1.08e-07	2.27e-06
ENSG00000166938	605	647	603	421	460	395	DIS3L	DIS3 mitotic control homolog (S. cerevisiae)-like [Source:HGNC Symbol;Acc:28698]	-0.567739	1.09e-07	2.29e-06
ENSG00000146733	1131	1192	1247	979	928	935	PSPH	phosphoserine phosphatase [Source:HGNC Symbol;Acc:9577]	-0.340283	1.14e-07	2.39e-06
ENSG00000076604	2307	2459	2330	3306	3330	3410	TRAF4	TNF receptor-associated factor 4 [Source:HGNC Symbol;Acc:12034]	0.521645	1.15e-07	2.42e-06
ENSG00000153187	9177	9880	8191	12243	11330	13119	HNRNPU	heterogeneous nuclear ribonucleoprotein U (scaffold attachment factor A) [Source:HGNC Symbol;Acc:5048]	0.464002	1.18e-07	2.47e-06
ENSG00000140326	438	400	420	259	249	249	CDAN1	codanin 1 [Source:HGNC Symbol;Acc:1713]	-0.744604	1.2e-07	2.5e-06
ENSG00000179562	1166	1159	1128	1416	1405	1434	GCC1	GRIP and coiled-coil domain containing 1 [Source:HGNC Symbol;Acc:19095]	0.309866	1.2e-07	2.5e-06
ENSG00000136319	386	352	338	251	258	253	TTC5	tetratricopeptide repeat domain 5 [Source:HGNC Symbol;Acc:19274]	-0.505299	1.29e-07	2.69e-06
ENSG00000121897	220	191	206	134	131	120	LIAS	lipoic acid synthetase [Source:HGNC Symbol;Acc:16429]	-0.71128	1.31e-07	2.72e-06
ENSG00000066322	2769	2692	2746	3507	3788	3756	ELOVL1	ELOVL fatty acid elongase 1 [Source:HGNC Symbol;Acc:14418]	0.444611	1.31e-07	2.73e-06
ENSG00000257671	3	4	3	29	28	37			3.17468	1.33e-07	2.75e-06
ENSG00000236515	417	384	391	229	297	285	ZBTB9	zinc finger and BTB domain containing 9 [Source:HGNC Symbol;Acc:28323]	-0.555732	1.35e-07	2.79e-06
ENSG00000152503	25	22	21	69	83	45	TRIM36	tripartite motif containing 36 [Source:HGNC Symbol;Acc:16280]	1.46205	1.35e-07	2.8e-06
ENSG00000180758	349	346	375	492	473	534	GPR157	G protein-coupled receptor 157 [Source:HGNC Symbol;Acc:23687]	0.492321	1.36e-07	2.81e-06
ENSG00000224870	407	459	423	278	338	301		HCG20425, isoform CRA_a; Uncharacterized protein; cDNA FLJ53815 [Source:UniProtKB/TrEMBL;Acc:B4DNA4]	-0.507864	1.36e-07	2.81e-06
ENSG00000247627	8	20	16	77	41	66	MTND4P12	MT-ND4 pseudogene 12 [Source:HGNC Symbol;Acc:42199]	2.16884	1.41e-07	2.92e-06
ENSG00000164294	156	136	136	62	77	77	GPX8	glutathione peroxidase 8 (putative) [Source:HGNC Symbol;Acc:33100]	-1.05514	1.42e-07	2.94e-06
ENSG00000141720	2900	2698	2960	2227	2245	2239	PIP4K2B	phosphatidylinositol-5-phosphate 4-kinase, type II, beta [Source:HGNC Symbol;Acc:8998]	-0.34738	1.49e-07	3.07e-06
ENSG00000076003	3411	3403	3396	2557	2838	2650	MCM6	minichromosome maintenance complex component 6 [Source:HGNC Symbol;Acc:6949]	-0.365357	1.51e-07	3.11e-06
ENSG00000099917	702	846	820	1123	1164	1273	MED15	mediator complex subunit 15 [Source:HGNC Symbol;Acc:14248]	0.606101	1.51e-07	3.12e-06
ENSG00000155256	785	779	792	1166	1240	1163	ZFYVE27	zinc finger, FYVE domain containing 27 [Source:HGNC Symbol;Acc:26559]	0.639488	1.52e-07	3.12e-06
ENSG00000169740	116	114	118	56	67	74	ZNF32	zinc finger protein 32 [Source:HGNC Symbol;Acc:13095]	-0.879445	1.56e-07	3.2e-06
ENSG00000119508	1	0	0	46	23	21	NR4A3	nuclear receptor subfamily 4, group A, member 3 [Source:HGNC Symbol;Acc:7982]	6.48389	1.68e-07	3.44e-06
ENSG00000181788	1360	1314	1327	1719	1719	1617	SIAH2	siah E3 ubiquitin protein ligase 2 [Source:HGNC Symbol;Acc:10858]	0.313323	1.72e-07	3.52e-06
ENSG00000224774	4	9	10	41	20	23	CSNK2B	casein kinase 2, beta polypeptide [Source:HGNC Symbol;Acc:2460]	1.88727	1.79e-07	3.66e-06
ENSG00000145990	560	567	519	775	750	738	GFOD1	glucose-fructose oxidoreductase domain containing 1 [Source:HGNC Symbol;Acc:21096]	0.452482	1.82e-07	3.72e-06
ENSG00000166398	449	500	493	603	657	639	KIAA0355	KIAA0355 [Source:HGNC Symbol;Acc:29016]	0.413168	1.84e-07	3.75e-06
ENSG00000177311	1423	1368	1476	2158	1948	1997	ZBTB38	zinc finger and BTB domain containing 38 [Source:HGNC Symbol;Acc:26636]	0.513401	1.83e-07	3.75e-06
ENSG00000262924	449	500	493	603	657	639	KIAA0355	KIAA0355 [Source:HGNC Symbol;Acc:29016]	0.413168	1.84e-07	3.75e-06
ENSG00000134250	2436	2524	2294	3239	2871	3019	NOTCH2	notch 2 [Source:HGNC Symbol;Acc:7882]	0.329747	1.91e-07	3.88e-06
ENSG00000065802	738	686	695	1033	1008	991	ASB1	ankyrin repeat and SOCS box containing 1 [Source:HGNC Symbol;Acc:16011]	0.531658	2e-07	4.07e-06
ENSG00000107581	8917	8504	7937	10721	10669	10817	EIF3A	eukaryotic translation initiation factor 3, subunit A [Source:HGNC Symbol;Acc:3271]	0.349961	2.05e-07	4.16e-06
ENSG00000136144	669	638	711	521	564	493	RCBTB1	regulator of chromosome condensation (RCC1) and BTB (POZ) domain containing protein 1 [Source:HGNC Symbol;Acc:18243]	-0.404177	2.07e-07	4.19e-06
ENSG00000164125	852	862	933	597	649	524	FAM198B	family with sequence similarity 198, member B [Source:HGNC Symbol;Acc:25312]	-0.691997	2.07e-07	4.2e-06
ENSG00000198894	657	597	546	437	435	399	CIPC	CLOCK-interacting pacemaker [Source:HGNC Symbol;Acc:20365]	-0.515034	2.11e-07	4.28e-06
ENSG00000165898	187	179	224	114	120	124	ISCA2	iron-sulfur cluster assembly 2 [Source:HGNC Symbol;Acc:19857]	-0.7764	2.21e-07	4.46e-06
ENSG00000225032	41	39	37	107	70	90			1.27668	2.24e-07	4.53e-06
ENSG00000174307	241	216	254	367	443	452	PHLDA3	pleckstrin homology-like domain, family A, member 3 [Source:HGNC Symbol;Acc:8934]	0.84441	2.26e-07	4.55e-06
ENSG00000189120	367	328	314	220	200	186	SP6	Sp6 transcription factor [Source:HGNC Symbol;Acc:14530]	-0.692965	2.28e-07	4.6e-06
ENSG00000136689	212	203	211	319	362	414	IL1RN	interleukin 1 receptor antagonist [Source:HGNC Symbol;Acc:6000]	0.834406	2.34e-07	4.7e-06
ENSG00000169962	14	12	7	36	26	54	TAS1R3	taste receptor, type 1, member 3 [Source:HGNC Symbol;Acc:15661]	1.91105	2.36e-07	4.74e-06
ENSG00000243509	0	8	0	37	10	32	TNFRSF6B	tumor necrosis factor receptor superfamily, member 6b, decoy [Source:HGNC Symbol;Acc:11921]	3.39057	2.44e-07	4.89e-06
ENSG00000135778	488	425	477	311	344	354	NTPCR	nucleoside-triphosphatase, cancer-related [Source:HGNC Symbol;Acc:28204]	-0.462847	2.46e-07	4.92e-06
ENSG00000168036	8582	7914	8569	9692	10098	10019	CTNNB1	catenin (cadherin-associated protein), beta 1, 88kDa [Source:HGNC Symbol;Acc:2514]	0.230198	2.45e-07	4.92e-06
ENSG00000101417	193	204	228	120	129	103	PXMP4	peroxisomal membrane protein 4, 24kDa [Source:HGNC Symbol;Acc:15920]	-0.809144	2.47e-07	4.95e-06
ENSG00000172057	1050	1096	1019	806	807	738	ORMDL3	ORM1-like 3 (S. cerevisiae) [Source:HGNC Symbol;Acc:16038]	-0.414204	2.67e-07	5.33e-06
ENSG00000188959	83	125	112	44	49	30	C9orf152	chromosome 9 open reading frame 152 [Source:HGNC Symbol;Acc:31455]	-1.43797	2.68e-07	5.35e-06
ENSG00000225855	49	54	53	107	89	111	RUSC1-AS1	RUSC1 antisense RNA 1 [Source:HGNC Symbol;Acc:26680]	0.99015	2.76e-07	5.51e-06
ENSG00000229320	142	134	139	218	234	239	KRT8P12	keratin 8 pseudogene 12 [Source:HGNC Symbol;Acc:28057]	0.75075	2.86e-07	5.71e-06
ENSG00000148843	2144	2189	2031	2805	2563	2941	PDCD11	programmed cell death 11 [Source:HGNC Symbol;Acc:13408]	0.413198	2.9e-07	5.78e-06
ENSG00000076248	3417	3188	3247	2443	2481	2445	UNG	uracil-DNA glycosylase [Source:HGNC Symbol;Acc:12572]	-0.415817	2.91e-07	5.79e-06
ENSG00000007944	411	426	373	304	276	278	MYLIP	myosin regulatory light chain interacting protein [Source:HGNC Symbol;Acc:21155]	-0.508762	2.96e-07	5.89e-06
ENSG00000110911	1050	1004	1079	826	839	802	SLC11A2	solute carrier family 11 (proton-coupled divalent metal ion transporter), member 2 [Source:HGNC Symbol;Acc:10908]	-0.381358	2.97e-07	5.89e-06
ENSG00000158669	1380	1434	1317	1720	1714	1696	AGPAT6	1-acylglycerol-3-phosphate O-acyltransferase 6 [Source:HGNC Symbol;Acc:20880]	0.322522	2.96e-07	5.89e-06
ENSG00000157184	758	776	725	508	588	538	CPT2	carnitine palmitoyltransferase 2 [Source:HGNC Symbol;Acc:2330]	-0.474206	3e-07	5.95e-06
ENSG00000151445	357	291	287	201	228	193	VIPAS39	VPS33B interacting protein, apical-basolateral polarity regulator, spe-39 homolog [Source:HGNC Symbol;Acc:20347]	-0.615338	3.01e-07	5.96e-06
ENSG00000127191	716	737	785	1092	1093	1122	TRAF2	TNF receptor-associated factor 2 [Source:HGNC Symbol;Acc:12032]	0.586921	3.11e-07	6.15e-06
ENSG00000173548	620	608	539	358	398	373	SNX33	sorting nexin 33 [Source:HGNC Symbol;Acc:28468]	-0.610011	3.16e-07	6.24e-06
ENSG00000235333	0	0	3	0	0	0	PVRIG2P	poliovirus receptor related immunoglobulin domain containing 2, pseudogene [Source:HGNC Symbol;Acc:48897]	-16.4486	3.3e-07	6.51e-06
ENSG00000128965	52	69	82	133	141	143	CHAC1	ChaC, cation transport regulator homolog 1 (E. coli) [Source:HGNC Symbol;Acc:28680]	1.06891	3.33e-07	6.55e-06
ENSG00000135842	331	314	287	510	486	453	FAM129A	family with sequence similarity 129, member A [Source:HGNC Symbol;Acc:16784]	0.608862	3.35e-07	6.6e-06
ENSG00000185219	507	510	473	356	362	339	ZNF445	zinc finger protein 445 [Source:HGNC Symbol;Acc:21018]	-0.479202	3.5e-07	6.89e-06
ENSG00000188997	154	174	188	94	91	115	KCTD21	potassium channel tetramerization domain containing 21 [Source:HGNC Symbol;Acc:27452]	-0.805655	3.55e-07	6.98e-06
ENSG00000183853	145	141	152	228	220	224	KIRREL	kin of IRRE like (Drosophila) [Source:HGNC Symbol;Acc:15734]	0.638108	3.57e-07	7.01e-06
ENSG00000163362	1389	1488	1493	1815	1858	1907	C1orf106	chromosome 1 open reading frame 106 [Source:HGNC Symbol;Acc:25599]	0.370367	3.69e-07	7.23e-06
ENSG00000185670	374	363	342	210	251	231	ZBTB3	zinc finger and BTB domain containing 3 [Source:HGNC Symbol;Acc:22918]	-0.627584	3.77e-07	7.39e-06
ENSG00000137393	133	148	175	88	110	72	RNF144B	ring finger protein 144B [Source:HGNC Symbol;Acc:21578]	-0.846914	4e-07	7.83e-06
ENSG00000168040	772	830	878	470	518	495	FADD	Fas (TNFRSF6)-associated via death domain [Source:HGNC Symbol;Acc:3573]	-0.732884	4.14e-07	8.09e-06
ENSG00000169710	3700	5499	5246	8569	8457	8810	FASN	fatty acid synthase [Source:HGNC Symbol;Acc:3594]	0.873475	4.14e-07	8.09e-06
ENSG00000164237	566	540	579	415	473	412	CMBL	carboxymethylenebutenolidase homolog (Pseudomonas) [Source:HGNC Symbol;Acc:25090]	-0.414641	4.17e-07	8.13e-06
ENSG00000153292	1687	1712	1646	1262	1361	1368	GPR110	G protein-coupled receptor 110 [Source:HGNC Symbol;Acc:18990]	-0.375786	4.18e-07	8.15e-06
ENSG00000090776	3479	3717	3783	5185	5394	5278	EFNB1	ephrin-B1 [Source:HGNC Symbol;Acc:3226]	0.551267	4.21e-07	8.19e-06
ENSG00000111837	19	12	13	57	51	56	MAK	male germ cell-associated kinase [Source:HGNC Symbol;Acc:6816]	1.92279	4.26e-07	8.29e-06
ENSG00000119514	1131	1112	1108	898	917	863	GALNT12	UDP-N-acetyl-alpha-D-galactosamine:polypeptide N-acetylgalactosaminyltransferase 12 (GalNAc-T12) [Source:HGNC Symbol;Acc:19877]	-0.343608	4.33e-07	8.41e-06
ENSG00000189298	42	33	39	6	8	19	ZKSCAN3	zinc finger with KRAB and SCAN domains 3 [Source:HGNC Symbol;Acc:13853]	-1.74281	4.44e-07	8.61e-06
ENSG00000116273	650	753	684	444	537	505	PHF13	PHD finger protein 13 [Source:HGNC Symbol;Acc:22983]	-0.496535	4.53e-07	8.79e-06
ENSG00000183486	413	450	380	640	643	651	MX2	myxovirus (influenza virus) resistance 2 (mouse) [Source:HGNC Symbol;Acc:7533]	0.675971	4.58e-07	8.87e-06
ENSG00000140941	397	426	385	625	667	575	MAP1LC3B	microtubule-associated protein 1 light chain 3 beta [Source:HGNC Symbol;Acc:13352]	0.584547	4.61e-07	8.91e-06
ENSG00000103335	2183	3102	3011	4924	5274	5513	PIEZO1	piezo-type mechanosensitive ion channel component 1 [Source:HGNC Symbol;Acc:28993]	0.948325	4.66e-07	9e-06
ENSG00000137221	382	401	374	533	500	565	TJAP1	tight junction associated protein 1 (peripheral) [Source:HGNC Symbol;Acc:17949]	0.491984	4.7e-07	9.08e-06
ENSG00000049249	2	2	0	33	19	26	TNFRSF9	tumor necrosis factor receptor superfamily, member 9 [Source:HGNC Symbol;Acc:11924]	4.36208	4.98e-07	9.61e-06
ENSG00000182718	46693	41958	44064	57145	60564	62866	ANXA2	annexin A2 [Source:HGNC Symbol;Acc:537]	0.453351	4.98e-07	9.61e-06
ENSG00000108270	2870	2740	2476	3627	3730	3913	AATF	apoptosis antagonizing transcription factor [Source:HGNC Symbol;Acc:19235]	0.507231	5.03e-07	9.68e-06
ENSG00000169499	361	339	371	236	254	191	PLEKHA2	pleckstrin homology domain containing, family A (phosphoinositide binding specific) member 2 [Source:HGNC Symbol;Acc:14336]	-0.734246	5.09e-07	9.79e-06
ENSG00000142408	34	33	24	75	49	85	CACNG8	calcium channel, voltage-dependent, gamma subunit 8 [Source:HGNC Symbol;Acc:13628]	1.28112	5.21e-07	1e-05
ENSG00000135269	3608	3397	3697	4437	4709	4630	TES	testis derived transcript (3 LIM domains) [Source:HGNC Symbol;Acc:14620]	0.343911	5.24e-07	1.01e-05
ENSG00000166509	2549	2438	2503	1716	1820	1665	CLEC3A	C-type lectin domain family 3, member A [Source:HGNC Symbol;Acc:2052]	-0.539443	5.28e-07	1.01e-05
ENSG00000198740	421	401	430	300	270	288	ZNF652	zinc finger protein 652 [Source:HGNC Symbol;Acc:29147]	-0.538812	5.33e-07	1.02e-05
ENSG00000104147	699	758	791	514	584	549	OIP5	Opa interacting protein 5 [Source:HGNC Symbol;Acc:20300]	-0.487239	5.47e-07	1.05e-05
ENSG00000137203	13	13	13	52	34	37	TFAP2A	transcription factor AP-2 alpha (activating enhancer binding protein 2 alpha) [Source:HGNC Symbol;Acc:11742]	1.65571	5.5e-07	1.05e-05
ENSG00000259583	207	182	195	104	115	103			-0.846994	5.57e-07	1.06e-05
ENSG00000273045	166	164	171	85	76	89		Uncharacterized protein C2orf15 [Source:UniProtKB/Swiss-Prot;Acc:Q8WU43]	-1.00303	5.61e-07	1.07e-05
ENSG00000213626	5	12	16	38	41	37	LBH	limb bud and heart development [Source:HGNC Symbol;Acc:29532]	1.76433	5.67e-07	1.08e-05
ENSG00000107338	540	559	576	836	817	889	SHB	Src homology 2 domain containing adaptor protein B [Source:HGNC Symbol;Acc:10838]	0.631536	5.77e-07	1.1e-05
ENSG00000169635	85	113	118	198	161	180	HIC2	hypermethylated in cancer 2 [Source:HGNC Symbol;Acc:18595]	0.8121	5.79e-07	1.1e-05
ENSG00000259956	0	0	0	156	179	0	RBM15B	RNA binding motif protein 15B [Source:HGNC Symbol;Acc:24303]	25.219	5.78e-07	1.1e-05
ENSG00000062370	127	109	95	0	34	16	ZNF112	zinc finger protein 112 [Source:HGNC Symbol;Acc:12892]	-3.25411	5.9e-07	1.12e-05
ENSG00000178096	69	78	69	29	31	29	BOLA1	bolA family member 1 [Source:HGNC Symbol;Acc:24263]	-1.26946	5.92e-07	1.12e-05
ENSG00000198366	1051	1152	1136	660	731	751	HIST1H3A	histone cluster 1, H3a [Source:HGNC Symbol;Acc:4766]	-0.598366	5.97e-07	1.13e-05
ENSG00000217801	67	71	80	124	161	154			0.988026	6.07e-07	1.15e-05
ENSG00000126705	137	144	160	305	261	269	AHDC1	AT hook, DNA binding motif, containing 1 [Source:HGNC Symbol;Acc:25230]	0.972105	6.13e-07	1.16e-05
ENSG00000111554	191	199	195	110	98	109	MDM1	Mdm1 nuclear protein homolog (mouse) [Source:HGNC Symbol;Acc:29917]	-0.877641	6.27e-07	1.18e-05
ENSG00000178038	259	346	328	453	411	477	ALS2CL	ALS2 C-terminal like [Source:HGNC Symbol;Acc:20605]	0.570186	6.25e-07	1.18e-05
ENSG00000173120	2309	2381	2182	2893	2651	2709	KDM2A	lysine (K)-specific demethylase 2A [Source:HGNC Symbol;Acc:13606]	0.300238	6.35e-07	1.19e-05
ENSG00000206513	0	0	0	11	12	14	UBD	ubiquitin D [Source:HGNC Symbol;Acc:18795]	6.09696	6.35e-07	1.19e-05
ENSG00000224654	0	0	0	11	12	14	UBD	ubiquitin D [Source:HGNC Symbol;Acc:18795]	6.09696	6.35e-07	1.19e-05
ENSG00000226898	0	0	0	11	12	14	UBD	ubiquitin D [Source:HGNC Symbol;Acc:18795]	6.09696	6.35e-07	1.19e-05
ENSG00000026036	59	57	75	152	285	190	RTEL1-TNFRSF6B	RTEL1-TNFRSF6B readthrough (NMD candidate) [Source:HGNC Symbol;Acc:44095]	1.67993	6.39e-07	1.2e-05
ENSG00000140297	10837	9709	9993	12894	12801	12890	GCNT3	glucosaminyl (N-acetyl) transferase 3, mucin type [Source:HGNC Symbol;Acc:4205]	0.34109	6.39e-07	1.2e-05
ENSG00000101146	1763	1731	1775	1441	1496	1547	RAE1	ribonucleic acid export 1 [Source:HGNC Symbol;Acc:9828]	-0.235974	6.58e-07	1.23e-05
ENSG00000125962	428	378	404	292	281	283	ARMCX5	armadillo repeat containing, X-linked 5 [Source:HGNC Symbol;Acc:25772]	-0.499518	6.55e-07	1.23e-05
ENSG00000105136	276	282	265	177	158	170	ZNF419	zinc finger protein 419 [Source:HGNC Symbol;Acc:20648]	-0.656724	6.62e-07	1.24e-05
ENSG00000139436	400	417	420	267	322	296	GIT2	G protein-coupled receptor kinase interacting ArfGAP 2 [Source:HGNC Symbol;Acc:4273]	-0.516393	6.62e-07	1.24e-05
ENSG00000132623	510	471	493	344	330	306	ANKEF1	ankyrin repeat and EF-hand domain containing 1 [Source:HGNC Symbol;Acc:15803]	-0.610922	6.7e-07	1.25e-05
ENSG00000083093	800	780	724	453	468	473	PALB2	partner and localizer of BRCA2 [Source:HGNC Symbol;Acc:26144]	-0.734231	6.81e-07	1.27e-05
ENSG00000168610	1905	1932	1810	2275	2302	2319	STAT3	signal transducer and activator of transcription 3 (acute-phase response factor) [Source:HGNC Symbol;Acc:11364]	0.296141	6.9e-07	1.29e-05
ENSG00000108654	7132	6634	6524	10454	10472	10607	DDX5	DEAD (Asp-Glu-Ala-Asp) box helicase 5 [Source:HGNC Symbol;Acc:2746]	0.625322	7.02e-07	1.3e-05
ENSG00000130921	669	598	556	394	424	454	C12orf65	chromosome 12 open reading frame 65 [Source:HGNC Symbol;Acc:26784]	-0.505286	7.01e-07	1.3e-05
ENSG00000197208	8	10	11	34	30	42	SLC22A4	solute carrier family 22 (organic cation/zwitterion transporter), member 4 [Source:HGNC Symbol;Acc:10968]	1.84681	7.03e-07	1.3e-05
ENSG00000263077	7132	6634	6524	10454	10472	10607	DDX5	DEAD (Asp-Glu-Ala-Asp) box helicase 5 [Source:HGNC Symbol;Acc:2746]	0.625322	7.02e-07	1.3e-05
ENSG00000111653	404	365	374	227	275	238	ING4	inhibitor of growth family, member 4 [Source:HGNC Symbol;Acc:19423]	-0.62588	7.18e-07	1.33e-05
ENSG00000131652	443	488	502	788	680	841	THOC6	THO complex 6 homolog (Drosophila) [Source:HGNC Symbol;Acc:28369]	0.717857	7.3e-07	1.35e-05
ENSG00000183864	1081	1048	970	1337	1370	1409	TOB2	transducer of ERBB2, 2 [Source:HGNC Symbol;Acc:11980]	0.421062	7.43e-07	1.37e-05
ENSG00000085276	1043	1016	947	751	843	772	MECOM	MDS1 and EVI1 complex locus [Source:HGNC Symbol;Acc:3498]	-0.370809	7.54e-07	1.39e-05
ENSG00000161570	22	33	30	77	70	76	CCL5	chemokine (C-C motif) ligand 5 [Source:HGNC Symbol;Acc:10632]	1.50169	7.57e-07	1.4e-05
ENSG00000034677	949	934	980	1794	1655	1477	RNF19A	ring finger protein 19A, RBR E3 ubiquitin protein ligase [Source:HGNC Symbol;Acc:13432]	0.71001	7.75e-07	1.43e-05
ENSG00000085449	1645	1654	1708	1301	1322	1171	WDFY1	WD repeat and FYVE domain containing 1 [Source:HGNC Symbol;Acc:20451]	-0.4531	7.73e-07	1.43e-05
ENSG00000101096	37	45	42	89	82	101	NFATC2	nuclear factor of activated T-cells, cytoplasmic, calcineurin-dependent 2 [Source:HGNC Symbol;Acc:7776]	1.18525	7.8e-07	1.44e-05
ENSG00000063660	420	509	497	755	877	918	GPC1	glypican 1 [Source:HGNC Symbol;Acc:4449]	0.859077	7.87e-07	1.45e-05
ENSG00000139531	236	178	199	120	117	128	SUOX	sulfite oxidase [Source:HGNC Symbol;Acc:11460]	-0.72792	7.98e-07	1.46e-05
ENSG00000140463	290	293	265	181	188	189	BBS4	Bardet-Biedl syndrome 4 [Source:HGNC Symbol;Acc:969]	-0.59213	7.98e-07	1.46e-05
ENSG00000140511	7	14	16	43	32	28	HAPLN3	hyaluronan and proteoglycan link protein 3 [Source:HGNC Symbol;Acc:21446]	1.51232	7.99e-07	1.46e-05
ENSG00000172113	410	363	398	265	245	249	NME6	NME/NM23 nucleoside diphosphate kinase 6 [Source:HGNC Symbol;Acc:20567]	-0.608919	8.03e-07	1.47e-05
ENSG00000088808	181	194	193	280	267	275	PPP1R13B	protein phosphatase 1, regulatory subunit 13B [Source:HGNC Symbol;Acc:14950]	0.539121	8.07e-07	1.48e-05
ENSG00000106688	1392	1312	1387	1052	1154	1050	SLC1A1	solute carrier family 1 (neuronal/epithelial high affinity glutamate transporter, system Xag), member 1 [Source:HGNC Symbol;Acc:10939]	-0.368584	8.08e-07	1.48e-05
ENSG00000171448	251	253	248	158	160	142	ZBTB26	zinc finger and BTB domain containing 26 [Source:HGNC Symbol;Acc:23383]	-0.811499	8.23e-07	1.5e-05
ENSG00000019144	3136	3235	3158	4341	4204	4070	PHLDB1	pleckstrin homology-like domain, family B, member 1 [Source:HGNC Symbol;Acc:23697]	0.452675	8.51e-07	1.55e-05
ENSG00000103550	1112	1064	1005	747	817	781	KNOP1	lysine-rich nucleolar protein 1 [Source:HGNC Symbol;Acc:34404]	-0.438583	8.86e-07	1.62e-05
ENSG00000109381	1203	1152	1162	739	762	689	ELF2	E74-like factor 2 (ets domain transcription factor) [Source:HGNC Symbol;Acc:3317]	-0.688039	9e-07	1.64e-05
ENSG00000159842	1334	1311	1307	1670	1662	1692	ABR	active BCR-related [Source:HGNC Symbol;Acc:81]	0.370819	9.03e-07	1.64e-05
ENSG00000112159	3205	3339	2991	4789	3723	4175	MDN1	MDN1, midasin homolog (yeast) [Source:HGNC Symbol;Acc:18302]	0.443094	9.29e-07	1.69e-05
ENSG00000154127	1696	1646	1599	2256	2176	2268	UBASH3B	ubiquitin associated and SH3 domain containing B [Source:HGNC Symbol;Acc:29884]	0.428367	9.47e-07	1.72e-05
ENSG00000173914	533	486	536	352	403	363	RBM4B	RNA binding motif protein 4B [Source:HGNC Symbol;Acc:28842]	-0.488186	9.69e-07	1.76e-05
ENSG00000161267	574	519	588	352	368	361	BDH1	3-hydroxybutyrate dehydrogenase, type 1 [Source:HGNC Symbol;Acc:1027]	-0.599087	1.01e-06	1.84e-05
ENSG00000235233	321	274	327	472	466	523	MICA	MHC class I polypeptide-related sequence A [Source:HGNC Symbol;Acc:7090]	0.681853	1.02e-06	1.84e-05
ENSG00000179134	750	874	774	1081	1110	1138	SAMD4B	sterile alpha motif domain containing 4B [Source:HGNC Symbol;Acc:25492]	0.508959	1.02e-06	1.85e-05
ENSG00000182359	78	71	109	34	43	38	KBTBD3	kelch repeat and BTB (POZ) domain containing 3 [Source:HGNC Symbol;Acc:22934]	-1.3097	1.03e-06	1.85e-05
ENSG00000073584	2281	2106	2241	1713	1792	1738	SMARCE1	SWI/SNF related, matrix associated, actin dependent regulator of chromatin, subfamily e, member 1 [Source:HGNC Symbol;Acc:11109]	-0.360982	1.05e-06	1.89e-05
ENSG00000115306	12577	12284	11391	14463	14141	14610	SPTBN1	spectrin, beta, non-erythrocytic 1 [Source:HGNC Symbol;Acc:11275]	0.275136	1.08e-06	1.95e-05
ENSG00000167536	143	141	172	73	84	68	DHRS13	dehydrogenase/reductase (SDR family) member 13 [Source:HGNC Symbol;Acc:28326]	-0.984452	1.09e-06	1.96e-05
ENSG00000090920	50	63	75	136	126	130	FCGBP	Fc fragment of IgG binding protein [Source:HGNC Symbol;Acc:13572]	1.09517	1.1e-06	1.99e-05
ENSG00000125812	544	508	510	404	380	387	GZF1	GDNF-inducible zinc finger protein 1 [Source:HGNC Symbol;Acc:15808]	-0.472562	1.12e-06	2.01e-05
ENSG00000198585	541	527	436	341	318	349	NUDT16	nudix (nucleoside diphosphate linked moiety X)-type motif 16 [Source:HGNC Symbol;Acc:26442]	-0.565515	1.13e-06	2.04e-05
ENSG00000183496	29	22	32	72	70	54	MEX3B	mex-3 RNA binding family member B [Source:HGNC Symbol;Acc:25297]	1.24312	1.2e-06	2.15e-05
ENSG00000186470	190	175	195	98	127	129	BTN3A2	butyrophilin, subfamily 3, member A2 [Source:HGNC Symbol;Acc:1139]	-0.663773	1.2e-06	2.16e-05
ENSG00000130684	172	188	178	66	95	110	ZNF337	zinc finger protein 337 [Source:HGNC Symbol;Acc:15809]	-0.897853	1.21e-06	2.17e-05
ENSG00000240857	268	249	311	170	160	132	RDH14	retinol dehydrogenase 14 (all-trans/9-cis/11-cis) [Source:HGNC Symbol;Acc:19979]	-0.889584	1.27e-06	2.28e-05
ENSG00000177946	197	208	193	123	121	138	CENPBD1	CENPB DNA-binding domains containing 1 [Source:HGNC Symbol;Acc:28272]	-0.685761	1.28e-06	2.3e-05
ENSG00000116833	301	263	332	165	157	119	NR5A2	nuclear receptor subfamily 5, group A, member 2 [Source:HGNC Symbol;Acc:7984]	-1.09025	1.34e-06	2.4e-05
ENSG00000142798	1837	2763	2539	4091	3610	3873	HSPG2	heparan sulfate proteoglycan 2 [Source:HGNC Symbol;Acc:5273]	0.756446	1.39e-06	2.48e-05
ENSG00000077044	695	781	778	1068	953	1059	DGKD	diacylglycerol kinase, delta 130kDa [Source:HGNC Symbol;Acc:2851]	0.480073	1.42e-06	2.54e-05
ENSG00000136695	16	17	20	65	53	55	IL36RN	interleukin 36 receptor antagonist [Source:HGNC Symbol;Acc:15561]	1.73724	1.42e-06	2.54e-05
ENSG00000260231	22	19	10	56	52	44	JHDM1D-AS1	JHDM1D antisense RNA 1 (head to head) [Source:HGNC Symbol;Acc:48959]	1.62771	1.46e-06	2.6e-05
ENSG00000182742	99	100	107	63	61	56	HOXB4	homeobox B4 [Source:HGNC Symbol;Acc:5115]	-0.752302	1.48e-06	2.62e-05
ENSG00000003989	641	547	593	407	417	372	SLC7A2	solute carrier family 7 (cationic amino acid transporter, y+ system), member 2 [Source:HGNC Symbol;Acc:11060]	-0.637054	1.5e-06	2.66e-05
ENSG00000261488	6	9	7	44	32	43			2.52724	1.56e-06	2.77e-05
ENSG00000136003	1160	1089	1108	898	915	907	ISCU	iron-sulfur cluster assembly enzyme [Source:HGNC Symbol;Acc:29882]	-0.335863	1.58e-06	2.8e-05
ENSG00000147471	503	460	484	363	389	363	PROSC	proline synthetase co-transcribed homolog (bacterial) [Source:HGNC Symbol;Acc:9457]	-0.443607	1.61e-06	2.84e-05
ENSG00000170633	936	929	969	697	708	747	RNF34	ring finger protein 34, E3 ubiquitin protein ligase [Source:HGNC Symbol;Acc:17297]	-0.384151	1.6e-06	2.84e-05
ENSG00000176024	107	86	89	40	34	41	ZNF613	zinc finger protein 613 [Source:HGNC Symbol;Acc:25827]	-1.29985	1.63e-06	2.88e-05
ENSG00000168488	469	489	424	675	626	628	ATXN2L	ataxin 2-like [Source:HGNC Symbol;Acc:31326]	0.523758	1.64e-06	2.9e-05
ENSG00000135211	385	379	393	239	260	215	TMEM60	transmembrane protein 60 [Source:HGNC Symbol;Acc:21754]	-0.79322	1.67e-06	2.95e-05
ENSG00000243649	9	14	7	51	25	41	CFB	complement factor B [Source:HGNC Symbol;Acc:1037]	2.15557	1.69e-06	2.97e-05
ENSG00000039523	34	47	59	98	85	107	FAM65A	family with sequence similarity 65, member A [Source:HGNC Symbol;Acc:25836]	1.10909	1.74e-06	3.06e-05
ENSG00000183475	824	863	926	668	724	607	ASB7	ankyrin repeat and SOCS box containing 7 [Source:HGNC Symbol;Acc:17182]	-0.435396	1.75e-06	3.09e-05
ENSG00000123395	889	1035	1076	1415	1446	1518	C12orf44	chromosome 12 open reading frame 44 [Source:HGNC Symbol;Acc:25679]	0.56216	1.81e-06	3.18e-05
ENSG00000197102	5280	5984	5368	7866	6495	7058	DYNC1H1	dynein, cytoplasmic 1, heavy chain 1 [Source:HGNC Symbol;Acc:2961]	0.39223	1.82e-06	3.19e-05
ENSG00000110324	1	1	0	26	23	18	IL10RA	interleukin 10 receptor, alpha [Source:HGNC Symbol;Acc:5964]	5.08955	1.86e-06	3.27e-05
ENSG00000108179	2445	2466	2410	3183	3210	3378	PPIF	peptidylprolyl isomerase F [Source:HGNC Symbol;Acc:9259]	0.416489	1.88e-06	3.29e-05
ENSG00000137819	1887	1821	1783	2229	2249	2203	PAQR5	progestin and adipoQ receptor family member V [Source:HGNC Symbol;Acc:29645]	0.255621	1.9e-06	3.32e-05
ENSG00000136240	5738	5683	6153	5115	5235	5024	KDELR2	KDEL (Lys-Asp-Glu-Leu) endoplasmic reticulum protein retention receptor 2 [Source:HGNC Symbol;Acc:6305]	-0.228111	1.94e-06	3.4e-05
ENSG00000155827	753	700	662	522	500	539	RNF20	ring finger protein 20, E3 ubiquitin protein ligase [Source:HGNC Symbol;Acc:10062]	-0.439992	1.97e-06	3.44e-05
ENSG00000060558	149	159	160	268	295	290	GNA15	guanine nucleotide binding protein (G protein), alpha 15 (Gq class) [Source:HGNC Symbol;Acc:4383]	0.870485	1.98e-06	3.46e-05
ENSG00000070087	3725	3643	4075	2639	2865	2376	PFN2	profilin 2 [Source:HGNC Symbol;Acc:8882]	-0.618357	2.01e-06	3.52e-05
ENSG00000158615	2719	2864	3145	5796	5579	4769	PPP1R15B	protein phosphatase 1, regulatory subunit 15B [Source:HGNC Symbol;Acc:14951]	0.817327	2.03e-06	3.54e-05
ENSG00000253552	119	141	122	67	64	72	HOXA-AS2	HOXA cluster antisense RNA 2 [Source:HGNC Symbol;Acc:43745]	-0.866287	2.08e-06	3.62e-05
ENSG00000183513	361	339	383	207	204	220	COA5	cytochrome c oxidase assembly factor 5 [Source:HGNC Symbol;Acc:33848]	-0.806299	2.15e-06	3.74e-05
ENSG00000155846	101	105	99	68	44	61	PPARGC1B	peroxisome proliferator-activated receptor gamma, coactivator 1 beta [Source:HGNC Symbol;Acc:30022]	-0.781275	2.16e-06	3.76e-05
ENSG00000148218	460	415	416	281	286	332	ALAD	aminolevulinate dehydratase [Source:HGNC Symbol;Acc:395]	-0.513637	2.21e-06	3.85e-05
ENSG00000008516	1	4	6	37	20	18	MMP25	matrix metallopeptidase 25 [Source:HGNC Symbol;Acc:14246]	2.77017	2.24e-06	3.88e-05
ENSG00000108829	6397	6214	6183	6852	7107	7073	LRRC59	leucine rich repeat containing 59 [Source:HGNC Symbol;Acc:28817]	0.162019	2.23e-06	3.88e-05
ENSG00000136153	7836	7329	7317	9274	9457	9740	LMO7	LIM domain 7 [Source:HGNC Symbol;Acc:6646]	0.327275	2.24e-06	3.88e-05
ENSG00000183963	553	613	613	842	886	973	SMTN	smoothelin [Source:HGNC Symbol;Acc:11126]	0.633372	2.24e-06	3.88e-05
ENSG00000164919	1708	1726	1745	1478	1587	1400	COX6C	cytochrome c oxidase subunit VIc [Source:HGNC Symbol;Acc:2285]	-0.266935	2.3e-06	3.97e-05
ENSG00000131153	1378	1247	1350	904	1024	1041	GINS2	GINS complex subunit 2 (Psf2 homolog) [Source:HGNC Symbol;Acc:24575]	-0.418742	2.32e-06	4.02e-05
ENSG00000267680	325	292	291	130	151	148	ZNF224	zinc finger protein 224 [Source:HGNC Symbol;Acc:13017]	-1.10909	2.35e-06	4.05e-05
ENSG00000196812	133	135	109	62	56	70	ZSCAN16	zinc finger and SCAN domain containing 16 [Source:HGNC Symbol;Acc:20813]	-1.00339	2.39e-06	4.13e-05
ENSG00000037637	635	618	625	443	500	491	FBXO42	F-box protein 42 [Source:HGNC Symbol;Acc:29249]	-0.38083	2.41e-06	4.16e-05
ENSG00000254290	226	212	183	96	89	84			-1.1967	2.42e-06	4.17e-05
ENSG00000111424	462	473	434	612	555	589	VDR	vitamin D (1,25- dihydroxyvitamin D3) receptor [Source:HGNC Symbol;Acc:12679]	0.380328	2.46e-06	4.23e-05
ENSG00000113732	1668	1531	1603	1295	1444	1371	ATP6V0E1	ATPase, H+ transporting, lysosomal 9kDa, V0 subunit e1 [Source:HGNC Symbol;Acc:863]	-0.263887	2.47e-06	4.25e-05
ENSG00000108854	570	563	572	899	899	839	SMURF2	SMAD specific E3 ubiquitin protein ligase 2 [Source:HGNC Symbol;Acc:16809]	0.60456	2.6e-06	4.45e-05
ENSG00000262909	570	563	572	899	899	839	SMURF2	SMAD specific E3 ubiquitin protein ligase 2 [Source:HGNC Symbol;Acc:16809]	0.60456	2.6e-06	4.45e-05
ENSG00000143858	9	6	6	35	30	36	SYT2	synaptotagmin II [Source:HGNC Symbol;Acc:11510]	2.27696	2.63e-06	4.5e-05
ENSG00000147475	725	717	732	607	607	589	ERLIN2	ER lipid raft associated 2 [Source:HGNC Symbol;Acc:1356]	-0.284162	2.63e-06	4.51e-05
ENSG00000171453	1150	1014	1079	1324	1349	1376	POLR1C	polymerase (RNA) I polypeptide C, 30kDa [Source:HGNC Symbol;Acc:20194]	0.333591	2.66e-06	4.55e-05
ENSG00000132801	157	155	158	96	106	96	ZSWIM3	zinc finger, SWIM-type containing 3 [Source:HGNC Symbol;Acc:16157]	-0.675814	2.69e-06	4.61e-05
ENSG00000130402	13220	14253	13903	17634	18340	19596	ACTN4	actinin, alpha 4 [Source:HGNC Symbol;Acc:166]	0.456341	2.72e-06	4.65e-05
ENSG00000163026	547	516	519	328	354	357	C2orf44	chromosome 2 open reading frame 44 [Source:HGNC Symbol;Acc:26157]	-0.633563	2.72e-06	4.65e-05
ENSG00000119922	395	356	335	529	541	489	IFIT2	interferon-induced protein with tetratricopeptide repeats 2 [Source:HGNC Symbol;Acc:5409]	0.513994	2.79e-06	4.77e-05
ENSG00000198551	225	217	192	103	113	121	ZNF627	zinc finger protein 627 [Source:HGNC Symbol;Acc:30570]	-0.944604	2.8e-06	4.77e-05
ENSG00000196372	635	624	605	381	446	412	ASB13	ankyrin repeat and SOCS box containing 13 [Source:HGNC Symbol;Acc:19765]	-0.586289	2.81e-06	4.78e-05
ENSG00000204947	52	72	64	38	26	26	ZNF425	zinc finger protein 425 [Source:HGNC Symbol;Acc:20690]	-1.06828	2.82e-06	4.79e-05
ENSG00000075142	1895	1824	1910	1577	1699	1627	SRI	sorcin [Source:HGNC Symbol;Acc:11292]	-0.219475	2.85e-06	4.83e-05
ENSG00000235109	132	113	115	64	68	77	ZSCAN31	zinc finger and SCAN domain containing 31 [Source:HGNC Symbol;Acc:14097]	-0.800558	2.85e-06	4.83e-05
ENSG00000100196	571	468	464	294	370	352	KDELR3	KDEL (Lys-Asp-Glu-Leu) endoplasmic reticulum protein retention receptor 3 [Source:HGNC Symbol;Acc:6306]	-0.606883	2.86e-06	4.85e-05
ENSG00000162063	2683	2665	2562	1750	1963	1895	CCNF	cyclin F [Source:HGNC Symbol;Acc:1591]	-0.491591	3.11e-06	5.28e-05
ENSG00000112984	2274	2062	1914	1387	1660	1506	KIF20A	kinesin family member 20A [Source:HGNC Symbol;Acc:9787]	-0.471326	3.13e-06	5.29e-05
ENSG00000196981	251	214	234	129	148	152	WDR5B	WD repeat domain 5B [Source:HGNC Symbol;Acc:17826]	-0.77985	3.16e-06	5.35e-05
ENSG00000055147	330	296	334	218	217	225	FAM114A2	family with sequence similarity 114, member A2 [Source:HGNC Symbol;Acc:1333]	-0.566578	3.22e-06	5.44e-05
ENSG00000005884	4675	4864	4689	6736	6887	7043	ITGA3	integrin, alpha 3 (antigen CD49C, alpha 3 subunit of VLA-3 receptor) [Source:HGNC Symbol;Acc:6139]	0.560448	3.27e-06	5.51e-05
ENSG00000180346	306	284	281	142	148	127	TIGD2	tigger transposable element derived 2 [Source:HGNC Symbol;Acc:18333]	-1.15378	3.27e-06	5.51e-05
ENSG00000130147	1014	981	967	743	800	758	SH3BP4	SH3-domain binding protein 4 [Source:HGNC Symbol;Acc:10826]	-0.383073	3.28e-06	5.52e-05
ENSG00000181016	11	23	13	56	48	37	LSMEM1	leucine-rich single-pass membrane protein 1 [Source:HGNC Symbol;Acc:22036]	1.50347	3.3e-06	5.56e-05
ENSG00000241878	645	690	759	977	891	1045	PISD	phosphatidylserine decarboxylase [Source:HGNC Symbol;Acc:8999]	0.504201	3.36e-06	5.65e-05
ENSG00000105499	10	4	0	22	22	20	PLA2G4C	phospholipase A2, group IVC (cytosolic, calcium-independent) [Source:HGNC Symbol;Acc:9037]	2.18389	3.4e-06	5.71e-05
ENSG00000131944	186	199	189	104	113	116	C19orf40	chromosome 19 open reading frame 40 [Source:HGNC Symbol;Acc:28467]	-0.765357	3.46e-06	5.81e-05
ENSG00000175283	356	347	351	228	243	258	DOLK	dolichol kinase [Source:HGNC Symbol;Acc:23406]	-0.536914	3.46e-06	5.81e-05
ENSG00000182180	2570	2518	2647	2117	2164	2109	MRPS16	mitochondrial ribosomal protein S16 [Source:HGNC Symbol;Acc:14048]	-0.282749	3.52e-06	5.9e-05
ENSG00000060642	517	476	494	317	354	346	PIGV	phosphatidylinositol glycan anchor biosynthesis, class V [Source:HGNC Symbol;Acc:26031]	-0.55884	3.53e-06	5.91e-05
ENSG00000175197	145	171	143	220	227	268	DDIT3	DNA-damage-inducible transcript 3 [Source:HGNC Symbol;Acc:2726]	0.700151	3.59e-06	6.01e-05
ENSG00000103257	4106	4841	4686	6395	6735	6751	SLC7A5	solute carrier family 7 (amino acid transporter light chain, L system), member 5 [Source:HGNC Symbol;Acc:11063]	0.554095	3.68e-06	6.15e-05
ENSG00000235636	0	0	0	38	28	22	NUS1P1	nuclear undecaprenyl pyrophosphate synthase 1 homolog (S. cerevisiae) pseudogene 1 [Source:HGNC Symbol;Acc:38472]	7.64493	3.78e-06	6.32e-05
ENSG00000166887	1081	1029	1049	826	890	872	VPS39	vacuolar protein sorting 39 homolog (S. cerevisiae) [Source:HGNC Symbol;Acc:20593]	-0.297725	3.84e-06	6.4e-05
ENSG00000134321	260	249	219	370	371	366	RSAD2	radical S-adenosyl methionine domain containing 2 [Source:HGNC Symbol;Acc:30908]	0.591806	3.89e-06	6.48e-05
ENSG00000196700	6	11	9	29	27	29	ZNF512B	zinc finger protein 512B [Source:HGNC Symbol;Acc:29212]	1.71759	3.89e-06	6.48e-05
ENSG00000164402	2149	2163	2101	1621	1734	1801	2018-09-08	septin 8 [Source:HGNC Symbol;Acc:16511]	-0.299785	3.91e-06	6.5e-05
ENSG00000106100	228	221	252	147	144	171	NOD1	nucleotide-binding oligomerization domain containing 1 [Source:HGNC Symbol;Acc:16390]	-0.555334	3.96e-06	6.58e-05
ENSG00000134222	583	543	547	330	401	357	PSRC1	proline/serine-rich coiled-coil 1 [Source:HGNC Symbol;Acc:24472]	-0.605887	4e-06	6.65e-05
ENSG00000125247	657	654	671	516	554	475	TMTC4	transmembrane and tetratricopeptide repeat containing 4 [Source:HGNC Symbol;Acc:25904]	-0.404556	4.09e-06	6.79e-05
ENSG00000167272	588	565	609	448	449	485	POP5	processing of precursor 5, ribonuclease P/MRP subunit (S. cerevisiae) [Source:HGNC Symbol;Acc:17689]	-0.37346	4.11e-06	6.81e-05
ENSG00000163528	318	279	297	211	239	190	CHCHD4	coiled-coil-helix-coiled-coil-helix domain containing 4 [Source:HGNC Symbol;Acc:26467]	-0.535551	4.14e-06	6.86e-05
ENSG00000145555	1822	1796	1645	2201	2177	2184	MYO10	myosin X [Source:HGNC Symbol;Acc:7593]	0.323966	4.24e-06	7.01e-05
ENSG00000119630	17	11	11	41	28	35	PGF	placental growth factor [Source:HGNC Symbol;Acc:8893]	1.46194	4.27e-06	7.06e-05
ENSG00000184939	133	130	133	54	81	69	ZFP90	ZFP90 zinc finger protein [Source:HGNC Symbol;Acc:23329]	-1.02948	4.28e-06	7.07e-05
ENSG00000187713	685	675	685	471	473	509	TMEM203	transmembrane protein 203 [Source:HGNC Symbol;Acc:28217]	-0.492131	4.31e-06	7.12e-05
ENSG00000160172	102	83	86	52	52	50	FAM86C2P	family with sequence similarity 86, member C2, pseudogene [Source:HGNC Symbol;Acc:42392]	-0.863344	4.33e-06	7.15e-05
ENSG00000182324	55	59	32	128	85	92	KCNJ14	potassium inwardly-rectifying channel, subfamily J, member 14 [Source:HGNC Symbol;Acc:6260]	1.12797	4.37e-06	7.2e-05
ENSG00000135045	176	207	201	135	143	116	C9orf40	chromosome 9 open reading frame 40 [Source:HGNC Symbol;Acc:23433]	-0.631268	4.45e-06	7.33e-05
ENSG00000113504	1161	1365	1367	1881	1767	1940	SLC12A7	solute carrier family 12 (potassium/chloride transporter), member 7 [Source:HGNC Symbol;Acc:10915]	0.567165	4.51e-06	7.43e-05
ENSG00000175155	236	224	206	153	149	150	YPEL2	yippee-like 2 (Drosophila) [Source:HGNC Symbol;Acc:18326]	-0.567542	4.58e-06	7.53e-05
ENSG00000183044	34	25	23	59	59	57	ABAT	4-aminobutyrate aminotransferase [Source:HGNC Symbol;Acc:23]	1.06859	4.59e-06	7.54e-05
ENSG00000137397	34	38	33	96	127	109	TRIM31	tripartite motif containing 31 [Source:HGNC Symbol;Acc:16289]	1.76555	4.64e-06	7.62e-05
ENSG00000075651	311	281	320	188	197	168	PLD1	phospholipase D1, phosphatidylcholine-specific [Source:HGNC Symbol;Acc:9067]	-0.738623	4.66e-06	7.64e-05
ENSG00000204335	37	47	39	9	10	11	SP5	Sp5 transcription factor [Source:HGNC Symbol;Acc:14529]	-1.8408	4.76e-06	7.8e-05
ENSG00000134815	618	845	802	1304	1282	1602	DHX34	DEAH (Asp-Glu-Ala-His) box polypeptide 34 [Source:HGNC Symbol;Acc:16719]	0.929106	4.77e-06	7.81e-05
ENSG00000230259	197	180	218	92	119	100			-1.00773	4.95e-06	8.1e-05
ENSG00000148396	1858	1991	1985	2584	2359	2477	SEC16A	SEC16 homolog A (S. cerevisiae) [Source:HGNC Symbol;Acc:29006]	0.367828	5.02e-06	8.2e-05
ENSG00000166483	1884	1885	1840	3837	3578	3322	WEE1	WEE1 G2 checkpoint kinase [Source:HGNC Symbol;Acc:12761]	0.907359	5.1e-06	8.33e-05
ENSG00000188211	477	470	395	738	682	692	NCR3LG1	natural killer cell cytotoxicity receptor 3 ligand 1 [Source:HGNC Symbol;Acc:42400]	0.714942	5.4e-06	8.8e-05
ENSG00000108264	695	652	694	460	497	475	TADA2A	transcriptional adaptor 2A [Source:HGNC Symbol;Acc:11531]	-0.513458	5.44e-06	8.87e-05
ENSG00000198959	11828	12342	11798	15620	15959	16236	TGM2	transglutaminase 2 [Source:HGNC Symbol;Acc:11778]	0.424127	5.53e-06	9e-05
ENSG00000084112	575	689	608	469	481	481	SSH1	slingshot protein phosphatase 1 [Source:HGNC Symbol;Acc:30579]	-0.388349	5.77e-06	9.39e-05
ENSG00000015475	1326	1362	1370	1631	1697	1696	BID	BH3 interacting domain death agonist [Source:HGNC Symbol;Acc:1050]	0.299702	5.81e-06	9.45e-05
ENSG00000079385	1272	1239	1055	1637	1824	1742	CEACAM1	carcinoembryonic antigen-related cell adhesion molecule 1 (biliary glycoprotein) [Source:HGNC Symbol;Acc:1814]	0.535411	5.86e-06	9.52e-05
ENSG00000063046	13499	13017	13775	12228	12468	11399	EIF4B	eukaryotic translation initiation factor 4B [Source:HGNC Symbol;Acc:3285]	-0.172938	5.89e-06	9.56e-05
ENSG00000128694	69	79	86	45	36	33	OSGEPL1	O-sialoglycoprotein endopeptidase-like 1 [Source:HGNC Symbol;Acc:23075]	-1.08282	6.01e-06	9.74e-05
ENSG00000140379	0	0	0	11	9	17	BCL2A1	BCL2-related protein A1 [Source:HGNC Symbol;Acc:991]	6.00407	6.03e-06	9.78e-05
ENSG00000178537	261	269	265	175	210	165	SLC25A20	solute carrier family 25 (carnitine/acylcarnitine translocase), member 20 [Source:HGNC Symbol;Acc:1421]	-0.55813	6.06e-06	9.81e-05
ENSG00000167874	2	0	0	23	34	31	TMEM88	transmembrane protein 88 [Source:HGNC Symbol;Acc:32371]	5.54025	6.11e-06	9.89e-05
ENSG00000140396	1238	1282	1267	1012	1020	964	NCOA2	nuclear receptor coactivator 2 [Source:HGNC Symbol;Acc:7669]	-0.348343	6.19e-06	0.000100001
ENSG00000188785	215	194	241	144	129	129	ZNF548	zinc finger protein 548 [Source:HGNC Symbol;Acc:26561]	-0.680622	6.2e-06	0.000100108
ENSG00000156384	201	173	209	364	317	329	SFR1	SWI5-dependent recombination repair 1 [Source:HGNC Symbol;Acc:29574]	0.763002	6.28e-06	0.000101272
ENSG00000163597	5130	4833	4914	6019	6056	5923	SNHG16	small nucleolar RNA host gene 16 (non-protein coding) [Source:HGNC Symbol;Acc:44352]	0.255974	6.31e-06	0.00010171
ENSG00000089154	6434	6507	6483	8174	8230	8303	GCN1L1	GCN1 general control of amino-acid synthesis 1-like 1 (yeast) [Source:HGNC Symbol;Acc:4199]	0.357299	6.34e-06	0.000102166
ENSG00000213923	933	924	1062	1456	1433	1510	CSNK1E	casein kinase 1, epsilon [Source:HGNC Symbol;Acc:2453]	0.618995	6.44e-06	0.000103578
ENSG00000137842	1722	1540	1609	1197	1286	1206	TMEM62	transmembrane protein 62 [Source:HGNC Symbol;Acc:26269]	-0.425886	6.45e-06	0.000103663
ENSG00000141543	2280	2271	2241	2546	2689	2826	EIF4A3	eukaryotic translation initiation factor 4A3 [Source:HGNC Symbol;Acc:18683]	0.249648	6.47e-06	0.000103983
ENSG00000173546	246	303	302	432	482	446	CSPG4	chondroitin sulfate proteoglycan 4 [Source:HGNC Symbol;Acc:2466]	0.723722	6.48e-06	0.00010401
ENSG00000105339	303	321	312	423	432	441	DENND3	DENN/MADD domain containing 3 [Source:HGNC Symbol;Acc:29134]	0.472479	6.54e-06	0.00010457
ENSG00000167615	178	206	214	336	328	433	LENG8	leukocyte receptor cluster (LRC) member 8 [Source:HGNC Symbol;Acc:15500]	0.884986	6.54e-06	0.00010457
ENSG00000168495	336	336	361	447	485	521	POLR3D	polymerase (RNA) III (DNA directed) polypeptide D, 44kDa [Source:HGNC Symbol;Acc:1080]	0.495559	6.53e-06	0.00010457
ENSG00000262602	178	206	214	336	328	433	LENG8	leukocyte receptor cluster (LRC) member 8 [Source:HGNC Symbol;Acc:15500]	0.884986	6.54e-06	0.00010457
ENSG00000212999	0	0	0	31	1	15			6.76724	6.62e-06	0.000105751
ENSG00000180257	886	695	684	409	412	425	ZNF816	zinc finger protein 816 [Source:HGNC Symbol;Acc:26995]	-0.853739	6.64e-06	0.000106013
ENSG00000107968	389	414	404	828	836	847	MAP3K8	mitogen-activated protein kinase kinase kinase 8 [Source:HGNC Symbol;Acc:6860]	0.998176	6.7e-06	0.000106902
ENSG00000184489	39	44	66	115	135	106	PTP4A3	protein tyrosine phosphatase type IVA, member 3 [Source:HGNC Symbol;Acc:9636]	1.30307	6.83e-06	0.000108898
ENSG00000221886	109	112	125	58	48	41	C5orf54	chromosome 5 open reading frame 54 [Source:HGNC Symbol;Acc:30804]	-1.35191	6.84e-06	0.000109054
ENSG00000178951	291	374	330	498	486	460	ZBTB7A	zinc finger and BTB domain containing 7A [Source:HGNC Symbol;Acc:18078]	0.54792	6.87e-06	0.000109325
ENSG00000015532	307	330	314	187	187	207	XYLT2	xylosyltransferase II [Source:HGNC Symbol;Acc:15517]	-0.662623	6.93e-06	0.000110153
ENSG00000176624	1540	1550	1585	2011	2043	1819	MEX3C	mex-3 RNA binding family member C [Source:HGNC Symbol;Acc:28040]	0.28858	6.93e-06	0.000110153
ENSG00000112941	1265	1261	1228	1546	1702	1492	PAPD7	PAP associated domain containing 7 [Source:HGNC Symbol;Acc:16705]	0.322466	7.09e-06	0.00011257
ENSG00000158882	203	221	205	128	151	129	TOMM40L	translocase of outer mitochondrial membrane 40 homolog (yeast)-like [Source:HGNC Symbol;Acc:25756]	-0.627191	7.11e-06	0.00011283
ENSG00000117228	179	196	208	612	527	559	GBP1	guanylate binding protein 1, interferon-inducible [Source:HGNC Symbol;Acc:4182]	1.61522	7.14e-06	0.000113264
ENSG00000147324	889	915	969	1289	1138	1167	MFHAS1	malignant fibrous histiocytoma amplified sequence 1 [Source:HGNC Symbol;Acc:16982]	0.361715	7.26e-06	0.000115037
ENSG00000182759	5	5	1	18	17	19	MAFA	v-maf avian musculoaponeurotic fibrosarcoma oncogene homolog A [Source:HGNC Symbol;Acc:23145]	2.35059	7.35e-06	0.000116392
ENSG00000164032	11378	11433	12816	10401	10845	9957	H2AFZ	H2A histone family, member Z [Source:HGNC Symbol;Acc:4741]	-0.229347	7.53e-06	0.000119113
ENSG00000170365	204	236	241	149	159	152	SMAD1	SMAD family member 1 [Source:HGNC Symbol;Acc:6767]	-0.555391	7.59e-06	0.000119969
ENSG00000140718	505	487	477	386	397	370	FTO	fat mass and obesity associated [Source:HGNC Symbol;Acc:24678]	-0.389469	7.77e-06	0.000122738
ENSG00000135111	533	589	520	361	371	372	TBX3	T-box 3 [Source:HGNC Symbol;Acc:11602]	-0.583192	7.85e-06	0.000123867
ENSG00000124635	2472	2670	2991	1528	1834	1837	HIST1H2BJ	histone cluster 1, H2bj [Source:HGNC Symbol;Acc:4761]	-0.628703	7.9e-06	0.000124438
ENSG00000101003	1419	1342	1566	1180	1169	1061	GINS1	GINS complex subunit 1 (Psf1 homolog) [Source:HGNC Symbol;Acc:28980]	-0.38498	7.94e-06	0.000124962
ENSG00000100207	1757	1723	1628	2077	2019	2125	TCF20	transcription factor 20 (AR1) [Source:HGNC Symbol;Acc:11631]	0.301819	7.96e-06	0.000125072
ENSG00000262024	1757	1723	1628	2077	2019	2125	TCF20	transcription factor 20 (AR1) [Source:HGNC Symbol;Acc:11631]	0.301819	7.96e-06	0.000125072
ENSG00000120068	114	95	86	52	50	51	HOXB8	homeobox B8 [Source:HGNC Symbol;Acc:5119]	-0.975865	8.12e-06	0.000127582
ENSG00000181104	2305	2130	2339	1898	1827	1641	F2R	coagulation factor II (thrombin) receptor [Source:HGNC Symbol;Acc:3537]	-0.348312	8.14e-06	0.000127781
ENSG00000105699	2516	2899	2860	4049	4443	4574	LSR	lipolysis stimulated lipoprotein receptor [Source:HGNC Symbol;Acc:29572]	0.681303	8.21e-06	0.000128759
ENSG00000104081	110	148	119	49	75	76	BMF	Bcl2 modifying factor [Source:HGNC Symbol;Acc:24132]	-0.968127	8.29e-06	0.000129898
ENSG00000173480	439	383	479	261	237	243	ZNF417	zinc finger protein 417 [Source:HGNC Symbol;Acc:20646]	-0.848943	8.36e-06	0.000130868
ENSG00000154518	3499	3513	3926	3030	3341	3060	ATP5G3	ATP synthase, H+ transporting, mitochondrial Fo complex, subunit C3 (subunit 9) [Source:HGNC Symbol;Acc:843]	-0.236125	8.46e-06	0.000132371
ENSG00000258186	0	3	0	14	25	14	SLC7A5P2	solute carrier family 7 (amino acid transporter light chain, L system), member 5 pseudogene 2 [Source:HGNC Symbol;Acc:24951]	4.35647	8.48e-06	0.000132586
ENSG00000119487	1694	1643	1628	1334	1462	1405	MAPKAP1	mitogen-activated protein kinase associated protein 1 [Source:HGNC Symbol;Acc:18752]	-0.244653	8.5e-06	0.00013272
ENSG00000130772	296	321	324	201	212	212	MED18	mediator complex subunit 18 [Source:HGNC Symbol;Acc:25944]	-0.558673	8.52e-06	0.000132972
ENSG00000105497	134	148	126	91	68	70	ZNF175	zinc finger protein 175 [Source:HGNC Symbol;Acc:12964]	-0.833506	8.54e-06	0.000133089
ENSG00000118898	2378	2462	2284	2903	3011	3154	PPL	periplakin [Source:HGNC Symbol;Acc:9273]	0.381374	8.54e-06	0.000133089
ENSG00000176020	100	127	148	30	9	25	AMIGO3	adhesion molecule with Ig-like domain 3 [Source:HGNC Symbol;Acc:24075]	-2.55612	8.57e-06	0.000133415
ENSG00000176383	19	18	10	44	34	34	B3GNT4	UDP-GlcNAc:betaGal beta-1,3-N-acetylglucosaminyltransferase 4 [Source:HGNC Symbol;Acc:15683]	1.26222	8.58e-06	0.000133494
ENSG00000184860	446	438	414	249	247	280	SDR42E1	short chain dehydrogenase/reductase family 42E, member 1 [Source:HGNC Symbol;Acc:29834]	-0.715794	8.61e-06	0.000133737
ENSG00000235370	4	6	3	25	12	18	DNM1P51	DNM1 pseudogene 51 [Source:HGNC Symbol;Acc:48500]	2.18305	8.64e-06	0.000134129
ENSG00000205060	451	466	454	331	352	306	SLC35B4	solute carrier family 35 (UDP-xylose/UDP-N-acetylglucosamine transporter), member B4 [Source:HGNC Symbol;Acc:20584]	-0.493786	8.67e-06	0.000134544
ENSG00000135919	204	212	241	331	303	306	SERPINE2	serpin peptidase inhibitor, clade E (nexin, plasminogen activator inhibitor type 1), member 2 [Source:HGNC Symbol;Acc:8951]	0.502388	8.78e-06	0.000136082
ENSG00000090487	2765	2804	2952	2424	2517	2338	SPG21	spastic paraplegia 21 (autosomal recessive, Mast syndrome) [Source:HGNC Symbol;Acc:20373]	-0.258516	8.81e-06	0.000136458
ENSG00000131115	368	422	232	179	154	123	ZNF227	zinc finger protein 227 [Source:HGNC Symbol;Acc:13020]	-1.13738	8.89e-06	0.000137534
ENSG00000137168	1695	1513	1589	1165	1314	1285	PPIL1	peptidylprolyl isomerase (cyclophilin)-like 1 [Source:HGNC Symbol;Acc:9260]	-0.366775	8.89e-06	0.000137534
ENSG00000007968	211	200	193	121	121	141	E2F2	E2F transcription factor 2 [Source:HGNC Symbol;Acc:3114]	-0.62987	9.04e-06	0.000139648
ENSG00000183386	69	76	77	116	131	122	FHL3	four and a half LIM domains 3 [Source:HGNC Symbol;Acc:3704]	0.782061	9.04e-06	0.000139648
ENSG00000179630	242	258	224	637	594	524	LACC1	laccase (multicopper oxidoreductase) domain containing 1 [Source:HGNC Symbol;Acc:26789]	1.22343	9.21e-06	0.000142048
ENSG00000198912	861	803	873	570	653	706	C1orf174	chromosome 1 open reading frame 174 [Source:HGNC Symbol;Acc:27915]	-0.408251	9.22e-06	0.000142137
ENSG00000172927	640	713	708	878	925	988	MYEOV	myeloma overexpressed [Source:HGNC Symbol;Acc:7563]	0.469197	9.27e-06	0.000142815
ENSG00000151490	218	172	215	104	93	92	PTPRO	protein tyrosine phosphatase, receptor type, O [Source:HGNC Symbol;Acc:9678]	-1.03233	9.41e-06	0.000144739
ENSG00000109854	1619	1483	1593	1286	1328	1265	HTATIP2	HIV-1 Tat interactive protein 2, 30kDa [Source:HGNC Symbol;Acc:16637]	-0.29251	9.55e-06	0.000146705
ENSG00000140650	1814	1803	1820	2145	2224	2245	PMM2	phosphomannomutase 2 [Source:HGNC Symbol;Acc:9115]	0.291269	9.55e-06	0.000146705
ENSG00000204370	2948	2952	3330	2413	2674	2145	SDHD	succinate dehydrogenase complex, subunit D, integral membrane protein [Source:HGNC Symbol;Acc:10683]	-0.450156	9.56e-06	0.000146747
ENSG00000169896	20	28	32	46	70	54	ITGAM	integrin, alpha M (complement component 3 receptor 3 subunit) [Source:HGNC Symbol;Acc:6149]	1.07924	9.57e-06	0.000146862
ENSG00000138942	581	551	516	407	439	415	RNF185	ring finger protein 185 [Source:HGNC Symbol;Acc:26783]	-0.390482	9.66e-06	0.000148007
ENSG00000140526	6777	6890	6721	7900	7825	7928	ABHD2	abhydrolase domain containing 2 [Source:HGNC Symbol;Acc:18717]	0.1992	9.69e-06	0.000148402
ENSG00000132911	276	220	205	378	428	384	NMUR2	neuromedin U receptor 2 [Source:HGNC Symbol;Acc:16454]	0.727453	9.74e-06	0.000148864
ENSG00000147118	161	136	135	70	82	75	ZNF182	zinc finger protein 182 [Source:HGNC Symbol;Acc:13001]	-0.967075	9.74e-06	0.000148864
ENSG00000091527	7214	6955	6798	11167	10939	10581	CDV3	CDV3 homolog (mouse) [Source:HGNC Symbol;Acc:26928]	0.612538	9.83e-06	0.00015013
ENSG00000122863	52	63	47	31	17	30	CHST3	carbohydrate (chondroitin 6) sulfotransferase 3 [Source:HGNC Symbol;Acc:1971]	-1.03518	1e-05	0.000153124
ENSG00000112578	672	682	679	843	874	903	BYSL	bystin-like [Source:HGNC Symbol;Acc:1157]	0.369846	1.04e-05	0.000157981
ENSG00000106829	339	345	341	469	465	489	TLE4	transducin-like enhancer of split 4 (E(sp1) homolog, Drosophila) [Source:HGNC Symbol;Acc:11840]	0.482353	1.04e-05	0.000158652
ENSG00000132382	1295	1421	1330	1663	1832	1902	MYBBP1A	MYB binding protein (P160) 1a [Source:HGNC Symbol;Acc:7546]	0.441766	1.07e-05	0.000163394
ENSG00000188786	222	236	212	327	291	313	MTF1	metal-regulatory transcription factor 1 [Source:HGNC Symbol;Acc:7428]	0.491157	1.08e-05	0.000164037
ENSG00000131435	5	11	9	37	45	56	PDLIM4	PDZ and LIM domain 4 [Source:HGNC Symbol;Acc:16501]	2.48459	1.08e-05	0.000164607
ENSG00000150893	362	372	301	224	213	198	FREM2	FRAS1 related extracellular matrix protein 2 [Source:HGNC Symbol;Acc:25396]	-0.795718	1.09e-05	0.00016558
ENSG00000101040	1447	1432	1434	1160	1226	1145	ZMYND8	zinc finger, MYND-type containing 8 [Source:HGNC Symbol;Acc:9397]	-0.289005	1.14e-05	0.000172627
ENSG00000173660	4617	4402	4441	3951	4007	3835	UQCRH	ubiquinol-cytochrome c reductase hinge protein [Source:HGNC Symbol;Acc:12590]	-0.214947	1.15e-05	0.000174949
ENSG00000068028	98	109	123	162	201	175	RASSF1	Ras association (RalGDS/AF-6) domain family member 1 [Source:HGNC Symbol;Acc:9882]	0.694122	1.17e-05	0.000177218
ENSG00000263005	98	109	123	162	201	175	RASSF1	Ras association (RalGDS/AF-6) domain family member 1 [Source:HGNC Symbol;Acc:9882]	0.694122	1.17e-05	0.000177218
ENSG00000169047	1651	1941	1975	1199	1275	1283	IRS1	insulin receptor substrate 1 [Source:HGNC Symbol;Acc:6125]	-0.564178	1.17e-05	0.000177634
ENSG00000109084	1068	1016	1015	816	828	837	TMEM97	transmembrane protein 97 [Source:HGNC Symbol;Acc:28106]	-0.341109	1.19e-05	0.000179656
ENSG00000262046	1068	1016	1015	816	828	837	TMEM97	transmembrane protein 97 [Source:HGNC Symbol;Acc:28106]	-0.341109	1.19e-05	0.000179656
ENSG00000167130	946	893	1025	684	729	689	DOLPP1	dolichyldiphosphatase 1 [Source:HGNC Symbol;Acc:29565]	-0.451404	1.22e-05	0.000184831
ENSG00000223532	8	13	30	108	92	62	HLA-B	major histocompatibility complex, class I, B [Source:HGNC Symbol;Acc:4932]	2.27375	1.23e-05	0.000184971
ENSG00000108515	20	20	17	49	32	44	ENO3	enolase 3 (beta, muscle) [Source:HGNC Symbol;Acc:3354]	1.16895	1.24e-05	0.00018678
ENSG00000142686	773	684	643	499	460	476	C1orf216	chromosome 1 open reading frame 216 [Source:HGNC Symbol;Acc:26800]	-0.50727	1.25e-05	0.000187633
ENSG00000225973	145	139	156	89	102	84			-0.722481	1.25e-05	0.000187929
ENSG00000143363	299	275	264	86	178	177	PRUNE	prune exopolyphosphatase [Source:HGNC Symbol;Acc:13420]	-1.02446	1.25e-05	0.000188602
ENSG00000107897	1142	1160	1122	838	785	832	ACBD5	acyl-CoA binding domain containing 5 [Source:HGNC Symbol;Acc:23338]	-0.489017	1.27e-05	0.000191249
ENSG00000110713	8093	7661	7437	9065	9052	9052	NUP98	nucleoporin 98kDa [Source:HGNC Symbol;Acc:8068]	0.229951	1.28e-05	0.000191554
ENSG00000259758	2867	3469	3254	5443	4399	4228	CASC7	cancer susceptibility candidate 7 (non-protein coding) [Source:HGNC Symbol;Acc:48905]	0.548193	1.29e-05	0.00019415
ENSG00000115946	1127	1061	1075	1284	1341	1322	PNO1	partner of NOB1 homolog (S. cerevisiae) [Source:HGNC Symbol;Acc:32790]	0.249553	1.31e-05	0.00019663
ENSG00000166592	1	2	1	20	16	10	RRAD	Ras-related associated with diabetes [Source:HGNC Symbol;Acc:10446]	3.55974	1.32e-05	0.000197552
ENSG00000106006	52	65	69	22	37	15	HOXA6	homeobox A6 [Source:HGNC Symbol;Acc:5107]	-1.32578	1.33e-05	0.000199413
ENSG00000186834	401	436	380	536	516	539	HEXIM1	hexamethylene bis-acetamide inducible 1 [Source:HGNC Symbol;Acc:24953]	0.380854	1.34e-05	0.000199842
ENSG00000258655	24	26	17	50	59	55	ARHGAP5-AS1	ARHGAP5 antisense RNA 1 (head to head) [Source:HGNC Symbol;Acc:20279]	1.33114	1.35e-05	0.000201799
ENSG00000054598	148	164	163	288	278	284	FOXC1	forkhead box C1 [Source:HGNC Symbol;Acc:3800]	0.809032	1.36e-05	0.000202514
ENSG00000167528	367	343	360	520	483	553	ZNF641	zinc finger protein 641 [Source:HGNC Symbol;Acc:31834]	0.533539	1.36e-05	0.000202514
ENSG00000143149	1859	1790	1771	1492	1570	1492	ALDH9A1	aldehyde dehydrogenase 9 family, member A1 [Source:HGNC Symbol;Acc:412]	-0.263729	1.36e-05	0.000202986
ENSG00000051108	927	898	863	1120	1092	1101	HERPUD1	homocysteine-inducible, endoplasmic reticulum stress-inducible, ubiquitin-like domain member 1 [Source:HGNC Symbol;Acc:13744]	0.297336	1.37e-05	0.000203979
ENSG00000109118	331	320	277	192	228	223	PHF12	PHD finger protein 12 [Source:HGNC Symbol;Acc:20816]	-0.524452	1.37e-05	0.000204065
ENSG00000065491	385	370	330	512	552	473	TBC1D22B	TBC1 domain family, member 22B [Source:HGNC Symbol;Acc:21602]	0.505329	1.37e-05	0.000204143
ENSG00000177352	109	122	102	54	78	63	CCDC71	coiled-coil domain containing 71 [Source:HGNC Symbol;Acc:25760]	-0.777876	1.38e-05	0.000204366
ENSG00000272414	235	220	192	120	152	127		uncharacterized protein LOC100631383 [Source:RefSeq peptide;Acc:NP_001229868]	-0.727264	1.39e-05	0.000205984
ENSG00000166192	100	115	133	58	67	45	SENP8	SUMO/sentrin specific peptidase family member 8 [Source:HGNC Symbol;Acc:22992]	-1.02637	1.42e-05	0.000210598
ENSG00000184205	374	374	338	467	440	532	TSPYL2	TSPY-like 2 [Source:HGNC Symbol;Acc:24358]	0.452254	1.42e-05	0.000210678
ENSG00000183779	148	170	193	74	93	73	ZNF703	zinc finger protein 703 [Source:HGNC Symbol;Acc:25883]	-1.08843	1.45e-05	0.000214352
ENSG00000139083	368	360	342	472	461	489	ETV6	ets variant 6 [Source:HGNC Symbol;Acc:3495]	0.471355	1.46e-05	0.000216203
ENSG00000166979	102	113	102	55	49	77	EVA1C	eva-1 homolog C (C. elegans) [Source:HGNC Symbol;Acc:13239]	-0.757386	1.46e-05	0.000216637
ENSG00000250656	24	33	23	67	82	71	ST3GAL1P1	ST3 beta-galactoside alpha-2,3-sialyltransferase 1 pseudogene 1 [Source:HGNC Symbol;Acc:45174]	1.49158	1.47e-05	0.000217091
ENSG00000172728	205	209	205	120	128	130	FUT10	fucosyltransferase 10 (alpha (1,3) fucosyltransferase) [Source:HGNC Symbol;Acc:19234]	-0.680843	1.48e-05	0.000218575
ENSG00000117640	390	359	383	294	303	271	MTFR1L	mitochondrial fission regulator 1-like [Source:HGNC Symbol;Acc:28836]	-0.383859	1.5e-05	0.000220953
ENSG00000105329	298	317	279	442	415	475	TGFB1	transforming growth factor, beta 1 [Source:HGNC Symbol;Acc:11766]	0.59215	1.5e-05	0.000221014
ENSG00000095752	6	7	14	28	25	28	IL11	interleukin 11 [Source:HGNC Symbol;Acc:5966]	1.6036	1.51e-05	0.000222162
ENSG00000214756	166	170	156	241	221	230	METTL12	methyltransferase like 12 [Source:HGNC Symbol;Acc:33113]	0.526605	1.51e-05	0.000222162
ENSG00000175602	95	183	163	358	413	428	CCDC85B	coiled-coil domain containing 85B [Source:HGNC Symbol;Acc:24926]	1.50056	1.55e-05	0.000228683
ENSG00000025772	2781	2577	2597	3201	3467	3595	TOMM34	translocase of outer mitochondrial membrane 34 [Source:HGNC Symbol;Acc:15746]	0.385388	1.56e-05	0.000228971
ENSG00000006118	221	234	274	425	398	419	TMEM132A	transmembrane protein 132A [Source:HGNC Symbol;Acc:31092]	0.789726	1.56e-05	0.000229325
ENSG00000152684	1556	1520	1529	1144	1264	1165	PELO	pelota homolog (Drosophila) [Source:HGNC Symbol;Acc:8829]	-0.376787	1.56e-05	0.000229325
ENSG00000120129	103	77	173	961	814	699	DUSP1	dual specificity phosphatase 1 [Source:HGNC Symbol;Acc:3064]	2.71148	1.57e-05	0.000230352
ENSG00000163155	32	32	44	14	12	18	LYSMD1	LysM, putative peptidoglycan-binding, domain containing 1 [Source:HGNC Symbol;Acc:32070]	-1.26247	1.59e-05	0.000232851
ENSG00000169021	3387	3312	3481	2777	3193	2876	UQCRFS1	ubiquinol-cytochrome c reductase, Rieske iron-sulfur polypeptide 1 [Source:HGNC Symbol;Acc:12587]	-0.226998	1.59e-05	0.000232851
ENSG00000105722	1060	1311	1241	1882	1990	2025	ERF	Ets2 repressor factor [Source:HGNC Symbol;Acc:3444]	0.72464	1.62e-05	0.000236881
ENSG00000165029	222	195	244	160	161	121	ABCA1	ATP-binding cassette, sub-family A (ABC1), member 1 [Source:HGNC Symbol;Acc:29]	-0.607368	1.63e-05	0.000237568
ENSG00000237296	519	502	580	1064	958	836	SMG1P1	SMG1 pseudogene 1 [Source:HGNC Symbol;Acc:44186]	0.795887	1.64e-05	0.000239628
ENSG00000151364	140	119	115	72	59	82	KCTD14	potassium channel tetramerization domain containing 14 [Source:HGNC Symbol;Acc:23295]	-0.789832	1.66e-05	0.000242256
ENSG00000103852	385	348	334	252	258	273	TTC23	tetratricopeptide repeat domain 23 [Source:HGNC Symbol;Acc:25730]	-0.449535	1.67e-05	0.000242856
ENSG00000136710	448	473	451	348	343	365	CCDC115	coiled-coil domain containing 115 [Source:HGNC Symbol;Acc:28178]	-0.369243	1.68e-05	0.000244583
ENSG00000244405	1067	1102	1142	917	952	897	ETV5	ets variant 5 [Source:HGNC Symbol;Acc:3494]	-0.271149	1.7e-05	0.000247036
ENSG00000164975	508	525	540	394	410	353	SNAPC3	small nuclear RNA activating complex, polypeptide 3, 50kDa [Source:HGNC Symbol;Acc:11136]	-0.517621	1.71e-05	0.000248699
ENSG00000125449	325	361	401	217	220	238	ARMC7	armadillo repeat containing 7 [Source:HGNC Symbol;Acc:26168]	-0.676415	1.72e-05	0.000250012
ENSG00000169598	184	191	160	100	140	99	DFFB	DNA fragmentation factor, 40kDa, beta polypeptide (caspase-activated DNase) [Source:HGNC Symbol;Acc:2773]	-0.703014	1.73e-05	0.000251518
ENSG00000168938	679	677	698	551	566	555	PPIC	peptidylprolyl isomerase C (cyclophilin C) [Source:HGNC Symbol;Acc:9256]	-0.318608	1.75e-05	0.000253758
ENSG00000255561	52	61	53	21	34	25	FDXACB1	ferredoxin-fold anticodon binding domain containing 1 [Source:HGNC Symbol;Acc:25110]	-1.14533	1.79e-05	0.000258966
ENSG00000215717	616	616	599	368	397	377	TMEM167B	transmembrane protein 167B [Source:HGNC Symbol;Acc:30187]	-0.726361	1.79e-05	0.00025939
ENSG00000158246	9	17	7	28	31	28	FAM46B	family with sequence similarity 46, member B [Source:HGNC Symbol;Acc:28273]	1.45458	1.79e-05	0.000259522
ENSG00000135828	244	210	206	135	143	124	RNASEL	ribonuclease L (2',5'-oligoisoadenylate synthetase-dependent) [Source:HGNC Symbol;Acc:10050]	-0.697704	1.8e-05	0.00025987
ENSG00000197062	111	83	105	48	52	51			-1.10411	1.81e-05	0.000261173
ENSG00000058799	381	387	374	269	274	305	YIPF1	Yip1 domain family, member 1 [Source:HGNC Symbol;Acc:25231]	-0.426127	1.83e-05	0.000264355
ENSG00000136653	311	270	268	142	151	161	RASSF5	Ras association (RalGDS/AF-6) domain family member 5 [Source:HGNC Symbol;Acc:17609]	-0.905339	1.84e-05	0.000264969
ENSG00000117625	334	301	279	213	185	170	RCOR3	REST corepressor 3 [Source:HGNC Symbol;Acc:25594]	-0.705379	1.84e-05	0.000265182
ENSG00000117616	845	976	870	1503	1250	1271	C1orf63	chromosome 1 open reading frame 63 [Source:HGNC Symbol;Acc:25234]	0.543232	1.9e-05	0.000273887
ENSG00000137135	425	408	420	263	295	311	ARHGEF39	Rho guanine nucleotide exchange factor (GEF) 39 [Source:HGNC Symbol;Acc:25909]	-0.468801	1.92e-05	0.000277014
ENSG00000186283	676	650	596	438	489	453	TOR3A	torsin family 3, member A [Source:HGNC Symbol;Acc:11997]	-0.46112	1.93e-05	0.000277665
ENSG00000238273	3	10	3	31	17	27			2.23665	1.93e-05	0.000277665
ENSG00000184900	2329	2305	2541	2003	2059	1903	SUMO3	small ubiquitin-like modifier 3 [Source:HGNC Symbol;Acc:11124]	-0.305442	1.93e-05	0.000277809
ENSG00000142945	2959	2763	2661	2173	2335	2272	KIF2C	kinesin family member 2C [Source:HGNC Symbol;Acc:6393]	-0.294745	1.95e-05	0.00027953
ENSG00000153575	1004	1078	1012	742	785	686	TUBGCP5	tubulin, gamma complex associated protein 5 [Source:HGNC Symbol;Acc:18600]	-0.509098	1.95e-05	0.00027953
ENSG00000162639	657	618	619	478	441	424	HENMT1	HEN1 methyltransferase homolog 1 (Arabidopsis) [Source:HGNC Symbol;Acc:26400]	-0.50582	1.95e-05	0.000280268
ENSG00000110218	1097	1056	1089	1403	1537	1352	PANX1	pannexin 1 [Source:HGNC Symbol;Acc:8599]	0.375349	1.96e-05	0.000280291
ENSG00000106351	338	333	342	217	242	220	AGFG2	ArfGAP with FG repeats 2 [Source:HGNC Symbol;Acc:5177]	-0.576604	1.96e-05	0.000280799
ENSG00000131015	120	98	116	153	185	168	ULBP2	UL16 binding protein 2 [Source:HGNC Symbol;Acc:14894]	0.58083	1.96e-05	0.000280799
ENSG00000115944	2049	1916	2128	1644	1840	1696	COX7A2L	cytochrome c oxidase subunit VIIa polypeptide 2 like [Source:HGNC Symbol;Acc:2289]	-0.266482	1.98e-05	0.000283736
ENSG00000143315	384	358	414	250	281	253	PIGM	phosphatidylinositol glycan anchor biosynthesis, class M [Source:HGNC Symbol;Acc:18858]	-0.604331	1.99e-05	0.000284451
ENSG00000140406	533	711	705	1019	1161	1144	MESDC1	mesoderm development candidate 1 [Source:HGNC Symbol;Acc:13519]	0.776878	2e-05	0.000284976
ENSG00000229020	5	0	1	16	16	16	AKR7A2P1	aldo-keto reductase family 7, member A2 pseudogene 1 [Source:HGNC Symbol;Acc:24062]	3.03951	2.02e-05	0.000288343
ENSG00000050426	581	539	602	441	473	401	LETMD1	LETM1 domain containing 1 [Source:HGNC Symbol;Acc:24241]	-0.413901	2.02e-05	0.000288363
ENSG00000108733	187	138	166	73	77	81	PEX12	peroxisomal biogenesis factor 12 [Source:HGNC Symbol;Acc:8854]	-1.13429	2.04e-05	0.000290315
ENSG00000171243	245	199	246	122	123	127	SOSTDC1	sclerostin domain containing 1 [Source:HGNC Symbol;Acc:21748]	-0.881164	2.04e-05	0.000290315
ENSG00000170348	3788	3688	4025	3126	3141	2924	TMED10	transmembrane emp24-like trafficking protein 10 (yeast) [Source:HGNC Symbol;Acc:16998]	-0.379548	2.06e-05	0.000292859
ENSG00000253797	1109	1142	1052	841	832	788	UTP14C	UTP14, U3 small nucleolar ribonucleoprotein, homolog C (yeast) [Source:HGNC Symbol;Acc:20321]	-0.420278	2.06e-05	0.00029332
ENSG00000071575	48	64	82	121	106	116	TRIB2	tribbles pseudokinase 2 [Source:HGNC Symbol;Acc:30809]	0.870642	2.07e-05	0.000293423
ENSG00000224320	827	920	953	1267	1393	1415	HLA-A	major histocompatibility complex, class I, A [Source:HGNC Symbol;Acc:4931]	0.613922	2.07e-05	0.00029411
ENSG00000229215	827	920	953	1267	1393	1415	HLA-A	major histocompatibility complex, class I, A [Source:HGNC Symbol;Acc:4931]	0.613922	2.07e-05	0.00029411
ENSG00000167460	6333	5925	5745	7975	8163	7738	TPM4	tropomyosin 4 [Source:HGNC Symbol;Acc:12013]	0.398452	2.11e-05	0.000299431
ENSG00000066084	1746	1626	1634	2229	2011	2020	DIP2B	DIP2 disco-interacting protein 2 homolog B (Drosophila) [Source:HGNC Symbol;Acc:29284]	0.315884	2.12e-05	0.000300073
ENSG00000261150	79	226	183	622	571	575	EPPK1	epiplakin 1 [Source:HGNC Symbol;Acc:15577]	1.87929	2.12e-05	0.000300521
ENSG00000112299	84	61	107	211	180	174	VNN1	vanin 1 [Source:HGNC Symbol;Acc:12705]	1.18303	2.18e-05	0.000308835
ENSG00000160633	1312	1287	1092	1510	1556	1693	SAFB	scaffold attachment factor B [Source:HGNC Symbol;Acc:10520]	0.380984	2.19e-05	0.000308864
ENSG00000118523	118	160	146	197	228	223	CTGF	connective tissue growth factor [Source:HGNC Symbol;Acc:2500]	0.58223	2.22e-05	0.000313118
ENSG00000170903	814	698	738	506	499	461	MSANTD4	Myb/SANT-like DNA-binding domain containing 4 with coiled-coils [Source:HGNC Symbol;Acc:29383]	-0.667814	2.24e-05	0.000315289
ENSG00000103018	4087	3917	4445	3656	3805	3433	CYB5B	cytochrome b5 type B (outer mitochondrial membrane) [Source:HGNC Symbol;Acc:24374]	-0.2207	2.25e-05	0.000316686
ENSG00000246082	171	162	192	108	101	107	NUDT16P1	nudix (nucleoside diphosphate linked moiety X)-type motif 16 pseudogene 1 [Source:HGNC Symbol;Acc:27189]	-0.702457	2.29e-05	0.000322752
ENSG00000135069	1752	1810	1977	1550	1642	1419	PSAT1	phosphoserine aminotransferase 1 [Source:HGNC Symbol;Acc:19129]	-0.330136	2.32e-05	0.000326058
ENSG00000196357	220	168	205	96	104	110	ZNF565	zinc finger protein 565 [Source:HGNC Symbol;Acc:26726]	-0.996517	2.36e-05	0.000331676
ENSG00000158195	1807	1896	1774	2246	2145	2189	WASF2	WAS protein family, member 2 [Source:HGNC Symbol;Acc:12733]	0.271515	2.37e-05	0.000332889
ENSG00000146083	167	193	212	281	275	257	RNF44	ring finger protein 44 [Source:HGNC Symbol;Acc:19180]	0.537672	2.38e-05	0.00033417
ENSG00000133056	728	765	695	469	414	451	PIK3C2B	phosphatidylinositol-4-phosphate 3-kinase, catalytic subunit type 2 beta [Source:HGNC Symbol;Acc:8972]	-0.661943	2.4e-05	0.000336951
ENSG00000168813	790	836	777	501	544	500	ZNF507	zinc finger protein 507 [Source:HGNC Symbol;Acc:23783]	-0.66829	2.42e-05	0.000339593
ENSG00000198039	241	235	226	143	142	149	ZNF273	zinc finger protein 273 [Source:HGNC Symbol;Acc:13067]	-0.70379	2.42e-05	0.000339655
ENSG00000203880	1232	1231	1303	1016	989	866	PCMTD2	protein-L-isoaspartate (D-aspartate) O-methyltransferase domain containing 2 [Source:HGNC Symbol;Acc:15882]	-0.434609	2.43e-05	0.000339655
ENSG00000173275	125	133	123	70	65	67	ZNF449	zinc finger protein 449 [Source:HGNC Symbol;Acc:21039]	-0.992424	2.43e-05	0.000340121
ENSG00000117010	59	72	93	24	42	39	ZNF684	zinc finger protein 684 [Source:HGNC Symbol;Acc:28418]	-1.18396	2.46e-05	0.000343229
ENSG00000264198	63	59	80	129	92	122			0.803056	2.49e-05	0.000347791
ENSG00000224542	127	119	29	489	329	511	TRIM31	tripartite motif containing 31 [Source:HGNC Symbol;Acc:16289]	2.34871	2.51e-05	0.000350734
ENSG00000221978	1298	1586	1499	2098	1770	1993	CCNL2	cyclin L2 [Source:HGNC Symbol;Acc:20570]	0.421379	2.55e-05	0.000356358
ENSG00000261553	96	60	49	208	126	156			1.34626	2.56e-05	0.000356925
ENSG00000180185	466	543	483	399	353	360	FAHD1	fumarylacetoacetate hydrolase domain containing 1 [Source:HGNC Symbol;Acc:14169]	-0.435101	2.59e-05	0.000360269
ENSG00000205659	292	302	307	195	218	193	LIN52	lin-52 homolog (C. elegans) [Source:HGNC Symbol;Acc:19856]	-0.604467	2.59e-05	0.000360639
ENSG00000100938	750	696	704	527	575	605	GMPR2	guanosine monophosphate reductase 2 [Source:HGNC Symbol;Acc:4377]	-0.329736	2.62e-05	0.000364678
ENSG00000168137	727	781	698	938	847	883	SETD5	SET domain containing 5 [Source:HGNC Symbol;Acc:25566]	0.301951	2.65e-05	0.000367724
ENSG00000198774	10	9	9	38	37	46	RASSF9	Ras association (RalGDS/AF-6) domain family (N-terminal) member 9 [Source:HGNC Symbol;Acc:15739]	2.10656	2.66e-05	0.000369394
ENSG00000072210	3288	3242	3237	2418	2643	2449	ALDH3A2	aldehyde dehydrogenase 3 family, member A2 [Source:HGNC Symbol;Acc:403]	-0.408326	2.7e-05	0.000375059
ENSG00000127084	187	199	181	113	142	123	FGD3	FYVE, RhoGEF and PH domain containing 3 [Source:HGNC Symbol;Acc:16027]	-0.627538	2.7e-05	0.000375059
ENSG00000140545	239	270	275	412	327	399	MFGE8	milk fat globule-EGF factor 8 protein [Source:HGNC Symbol;Acc:7036]	0.575154	2.78e-05	0.000385565
ENSG00000139318	2559	2458	2569	2244	2155	2072	DUSP6	dual specificity phosphatase 6 [Source:HGNC Symbol;Acc:3072]	-0.242423	2.8e-05	0.000387139
ENSG00000136848	598	663	543	443	464	416	DAB2IP	DAB2 interacting protein [Source:HGNC Symbol;Acc:17294]	-0.431465	2.81e-05	0.000388383
ENSG00000166860	467	432	418	316	342	341	ZBTB39	zinc finger and BTB domain containing 39 [Source:HGNC Symbol;Acc:29014]	-0.408053	2.83e-05	0.000390878
ENSG00000262028	52	52	49	13	31	25	FDXACB1	ferredoxin-fold anticodon binding domain containing 1 [Source:HGNC Symbol;Acc:25110]	-1.24698	2.85e-05	0.000393539
ENSG00000181754	44	41	36	19	14	13	AMIGO1	adhesion molecule with Ig-like domain 1 [Source:HGNC Symbol;Acc:20824]	-1.42067	2.85e-05	0.000393594
ENSG00000106524	586	574	542	348	369	320	ANKMY2	ankyrin repeat and MYND domain containing 2 [Source:HGNC Symbol;Acc:25370]	-0.753823	2.89e-05	0.000398824
ENSG00000124279	661	607	608	384	431	386	FASTKD3	FAST kinase domains 3 [Source:HGNC Symbol;Acc:28758]	-0.719471	2.91e-05	0.000400966
ENSG00000172731	467	444	423	261	261	329	LRRC20	leucine rich repeat containing 20 [Source:HGNC Symbol;Acc:23421]	-0.634027	2.97e-05	0.000409466
ENSG00000065328	1602	1547	1576	1277	1315	1355	MCM10	minichromosome maintenance complex component 10 [Source:HGNC Symbol;Acc:18043]	-0.273168	2.99e-05	0.000411517
ENSG00000116791	2013	2058	2374	1578	1763	1509	CRYZ	crystallin, zeta (quinone reductase) [Source:HGNC Symbol;Acc:2419]	-0.449765	3.02e-05	0.0004149
ENSG00000178229	440	476	459	304	373	319	ZNF543	zinc finger protein 543 [Source:HGNC Symbol;Acc:25281]	-0.507014	3.02e-05	0.000415172
ENSG00000151332	120	113	149	57	67	79	MBIP	MAP3K12 binding inhibitory protein 1 [Source:HGNC Symbol;Acc:20427]	-0.906908	3.07e-05	0.000421786
ENSG00000048162	1174	1128	963	1422	1478	1551	NOP16	NOP16 nucleolar protein [Source:HGNC Symbol;Acc:26934]	0.475114	3.09e-05	0.000424353
ENSG00000099940	707	734	721	573	617	595	SNAP29	synaptosomal-associated protein, 29kDa [Source:HGNC Symbol;Acc:11133]	-0.270599	3.1e-05	0.00042522
ENSG00000147168	5	5	0	18	15	25	IL2RG	interleukin 2 receptor, gamma [Source:HGNC Symbol;Acc:6010]	2.53576	3.15e-05	0.000431709
ENSG00000151718	358	341	347	443	488	468	WWC2	WW and C2 domain containing 2 [Source:HGNC Symbol;Acc:24148]	0.401539	3.15e-05	0.000431709
ENSG00000213965	663	719	659	532	539	525	NUDT19	nudix (nucleoside diphosphate linked moiety X)-type motif 19 [Source:HGNC Symbol;Acc:32036]	-0.396341	3.16e-05	0.000432831
ENSG00000127125	730	711	744	509	522	468	PPCS	phosphopantothenoylcysteine synthetase [Source:HGNC Symbol;Acc:25686]	-0.570637	3.17e-05	0.000433605
ENSG00000130939	1573	1661	1548	1294	1362	1304	UBE4B	ubiquitination factor E4B [Source:HGNC Symbol;Acc:12500]	-0.274351	3.19e-05	0.000435343
ENSG00000132359	620	661	599	805	860	777	RAP1GAP2	RAP1 GTPase activating protein 2 [Source:HGNC Symbol;Acc:29176]	0.386487	3.19e-05	0.000435343
ENSG00000075975	653	655	656	523	582	551	MKRN2	makorin ring finger protein 2 [Source:HGNC Symbol;Acc:7113]	-0.292315	3.2e-05	0.00043636
ENSG00000104368	7	10	3	23	20	21	PLAT	plasminogen activator, tissue [Source:HGNC Symbol;Acc:9051]	1.69914	3.2e-05	0.00043636
ENSG00000166670	0	0	0	27	25	37	MMP10	matrix metallopeptidase 10 (stromelysin 2) [Source:HGNC Symbol;Acc:7156]	7.10483	3.2e-05	0.00043636
ENSG00000114126	444	488	487	354	359	365	TFDP2	transcription factor Dp-2 (E2F dimerization partner 2) [Source:HGNC Symbol;Acc:11751]	-0.422568	3.21e-05	0.00043692
ENSG00000100226	832	835	880	1051	1046	1101	GTPBP1	GTP binding protein 1 [Source:HGNC Symbol;Acc:4669]	0.351069	3.29e-05	0.000447088
ENSG00000204920	103	105	109	53	42	62	ZNF155	zinc finger protein 155 [Source:HGNC Symbol;Acc:12940]	-0.91064	3.29e-05	0.000447088
ENSG00000259498	20	10	17	54	44	47			1.6761	3.29e-05	0.000447088
ENSG00000087111	1215	1130	1222	881	959	916	PIGS	phosphatidylinositol glycan anchor biosynthesis, class S [Source:HGNC Symbol;Acc:14937]	-0.376964	3.42e-05	0.000463831
ENSG00000117602	523	502	523	385	380	394	RCAN3	RCAN family member 3 [Source:HGNC Symbol;Acc:3042]	-0.448626	3.43e-05	0.000465336
ENSG00000178996	652	708	734	1092	1066	925	SNX18	sorting nexin 18 [Source:HGNC Symbol;Acc:19245]	0.510717	3.43e-05	0.000465336
ENSG00000132688	30	23	27	49	54	53	NES	nestin [Source:HGNC Symbol;Acc:7756]	0.995658	3.44e-05	0.000466023
ENSG00000152133	474	437	446	273	342	248	GPATCH11	G patch domain containing 11 [Source:HGNC Symbol;Acc:26768]	-0.714308	3.46e-05	0.000467866
ENSG00000166452	355	311	378	250	250	255	AKIP1	A kinase (PRKA) interacting protein 1 [Source:HGNC Symbol;Acc:1170]	-0.470434	3.46e-05	0.000468438
ENSG00000266796	0	0	0	23	11	0			5.9956	3.5e-05	0.000473741
ENSG00000153443	40	69	56	107	118	124	UBALD1	UBA-like domain containing 1 [Source:HGNC Symbol;Acc:29576]	1.12724	3.51e-05	0.000474659
ENSG00000177096	72	78	73	33	40	25	FAM109B	family with sequence similarity 109, member B [Source:HGNC Symbol;Acc:27161]	-1.17389	3.52e-05	0.000474954
ENSG00000104221	123	102	110	68	44	63	BRF2	BRF2, RNA polymerase III transcription initiation factor 50 kDa subunit [Source:HGNC Symbol;Acc:17298]	-0.898374	3.52e-05	0.000475173
ENSG00000182504	632	650	679	456	471	393	CEP97	centrosomal protein 97kDa [Source:HGNC Symbol;Acc:26244]	-0.654762	3.52e-05	0.000475173
ENSG00000198315	167	180	168	109	93	96	ZKSCAN8	zinc finger with KRAB and SCAN domains 8 [Source:HGNC Symbol;Acc:12983]	-0.762992	3.53e-05	0.000475621
ENSG00000179388	1	0	1	14	15	13	EGR3	early growth response 3 [Source:HGNC Symbol;Acc:3240]	4.42141	3.58e-05	0.000481654
ENSG00000246922	14	16	10	38	26	33	UBAP1L	ubiquitin associated protein 1-like [Source:HGNC Symbol;Acc:40028]	1.33298	3.6e-05	0.000483731
ENSG00000254473	19	13	27	5	7	4			-1.91228	3.6e-05	0.000484683
ENSG00000137166	147	152	142	214	224	212	FOXP4	forkhead box P4 [Source:HGNC Symbol;Acc:20842]	0.612945	3.61e-05	0.000485024
ENSG00000261604	2	5	3	36	12	18			2.87298	3.63e-05	0.000487256
ENSG00000122033	1041	982	943	657	651	668	MTIF3	mitochondrial translational initiation factor 3 [Source:HGNC Symbol;Acc:29788]	-0.590057	3.68e-05	0.000493069
ENSG00000139719	882	783	722	620	628	598	VPS33A	vacuolar protein sorting 33 homolog A (S. cerevisiae) [Source:HGNC Symbol;Acc:18179]	-0.396234	3.73e-05	0.00049956
ENSG00000162434	1997	1910	1920	2517	2485	2342	JAK1	Janus kinase 1 [Source:HGNC Symbol;Acc:6190]	0.320354	3.74e-05	0.000500528
ENSG00000124151	721	792	840	1031	1053	1049	NCOA3	nuclear receptor coactivator 3 [Source:HGNC Symbol;Acc:7670]	0.454614	3.75e-05	0.000501791
ENSG00000186951	700	671	721	582	547	504	PPARA	peroxisome proliferator-activated receptor alpha [Source:HGNC Symbol;Acc:9232]	-0.325604	3.77e-05	0.000504265
ENSG00000214194	806	703	790	560	524	546	LINC00998	long intergenic non-protein coding RNA 998 [Source:HGNC Symbol;Acc:48953]	-0.522667	3.77e-05	0.000504265
ENSG00000168884	1159	1186	1126	1463	1593	1565	TNIP2	TNFAIP3 interacting protein 2 [Source:HGNC Symbol;Acc:19118]	0.423521	3.78e-05	0.000504811
ENSG00000103888	739	681	608	487	479	490	KIAA1199	KIAA1199 [Source:HGNC Symbol;Acc:29213]	-0.498775	3.79e-05	0.00050554
ENSG00000101187	842	856	936	1252	1261	1471	SLCO4A1	solute carrier organic anion transporter family, member 4A1 [Source:HGNC Symbol;Acc:10953]	0.61638	3.8e-05	0.00050694
ENSG00000112039	309	251	252	171	171	156	FANCE	Fanconi anemia, complementation group E [Source:HGNC Symbol;Acc:3586]	-0.674132	3.81e-05	0.000508533
ENSG00000205334	8	9	16	37	32	33		Uncharacterized protein [Source:UniProtKB/TrEMBL;Acc:B7WNW1]	1.59991	3.83e-05	0.000509559
ENSG00000261522	3	4	9	30	20	29			2.28202	3.83e-05	0.000509559
ENSG00000107554	1459	1463	1414	1148	1252	1129	DNMBP	dynamin binding protein [Source:HGNC Symbol;Acc:30373]	-0.300509	3.91e-05	0.000519714
ENSG00000171345	12866	13689	14625	18837	20854	21802	KRT19	keratin 19 [Source:HGNC Symbol;Acc:6436]	0.606848	3.93e-05	0.000522027
ENSG00000101188	804	963	861	1376	1371	1499	NTSR1	neurotensin receptor 1 (high affinity) [Source:HGNC Symbol;Acc:8039]	0.727085	3.94e-05	0.000523704
ENSG00000095637	44	42	23	70	93	70	SORBS1	sorbin and SH3 domain containing 1 [Source:HGNC Symbol;Acc:14565]	1.08537	3.96e-05	0.000525289
ENSG00000081386	297	291	298	140	152	165	ZNF510	zinc finger protein 510 [Source:HGNC Symbol;Acc:29161]	-0.990791	3.97e-05	0.000526794
ENSG00000106003	834	957	1009	1285	1299	1248	LFNG	LFNG O-fucosylpeptide 3-beta-N-acetylglucosaminyltransferase [Source:HGNC Symbol;Acc:6560]	0.449496	3.98e-05	0.00052691
ENSG00000109917	1936	1783	1783	2288	2305	2449	ZNF259	zinc finger protein 259 [Source:HGNC Symbol;Acc:13051]	0.381679	3.98e-05	0.00052691
ENSG00000051009	775	829	615	1080	1175	1166	FAM160A2	family with sequence similarity 160, member A2 [Source:HGNC Symbol;Acc:25378]	0.651166	3.99e-05	0.00052861
ENSG00000156253	305	254	278	206	212	192	RWDD2B	RWD domain containing 2B [Source:HGNC Symbol;Acc:1302]	-0.483128	4.01e-05	0.000529859
ENSG00000132170	3679	3304	3555	4202	4195	4373	PPARG	peroxisome proliferator-activated receptor gamma [Source:HGNC Symbol;Acc:9236]	0.292053	4.02e-05	0.000530835
ENSG00000240163	5	2	1	29	11	17			2.92335	4.03e-05	0.000532351
ENSG00000205213	1811	1753	1820	1151	1186	1036	LGR4	leucine-rich repeat containing G protein-coupled receptor 4 [Source:HGNC Symbol;Acc:13299]	-0.724274	4.08e-05	0.000538525
ENSG00000095539	206	241	229	127	148	166	SEMA4G	sema domain, immunoglobulin domain (Ig), transmembrane domain (TM) and short cytoplasmic domain, (semaphorin) 4G [Source:HGNC Symbol;Acc:10735]	-0.673767	4.16e-05	0.00054886
ENSG00000105717	1	9	11	42	16	32	PBX4	pre-B-cell leukemia homeobox 4 [Source:HGNC Symbol;Acc:13403]	2.16184	4.17e-05	0.00055024
ENSG00000154358	125	190	146	279	232	248	OBSCN	obscurin, cytoskeletal calmodulin and titin-interacting RhoGEF [Source:HGNC Symbol;Acc:15719]	0.776428	4.26e-05	0.000561381
ENSG00000249471	239	256	245	166	155	196	ZNF324B	zinc finger protein 324B [Source:HGNC Symbol;Acc:33107]	-0.487393	4.26e-05	0.000561381
ENSG00000152766	248	229	249	396	410	400	ANKRD22	ankyrin repeat domain 22 [Source:HGNC Symbol;Acc:28321]	0.682715	4.36e-05	0.000573923
ENSG00000181004	68	72	67	29	42	26	BBS12	Bardet-Biedl syndrome 12 [Source:HGNC Symbol;Acc:26648]	-1.1691	4.4e-05	0.000578284
ENSG00000132773	596	612	598	400	451	437	TOE1	target of EGR1, member 1 (nuclear) [Source:HGNC Symbol;Acc:15954]	-0.5001	4.48e-05	0.000588357
ENSG00000140280	297	278	269	193	196	195	LYSMD2	LysM, putative peptidoglycan-binding, domain containing 2 [Source:HGNC Symbol;Acc:28571]	-0.61069	4.5e-05	0.00059025
ENSG00000179335	713	713	698	930	917	1028	CLK3	CDC-like kinase 3 [Source:HGNC Symbol;Acc:2071]	0.483637	4.5e-05	0.000590526
ENSG00000108622	5	7	6	22	25	20	ICAM2	intercellular adhesion molecule 2 [Source:HGNC Symbol;Acc:5345]	2.01722	4.54e-05	0.000595467
ENSG00000149218	999	979	943	734	729	748	ENDOD1	endonuclease domain containing 1 [Source:HGNC Symbol;Acc:29129]	-0.40771	4.55e-05	0.000595566
ENSG00000262523	999	979	943	734	729	748	ENDOD1	endonuclease domain containing 1 [Source:HGNC Symbol;Acc:29129]	-0.40771	4.55e-05	0.000595566
ENSG00000255811	0	1	3	14	10	27			3.98246	4.56e-05	0.000596416
ENSG00000257512	139	126	119	66	64	56			-1.08726	4.56e-05	0.000596416
ENSG00000203943	15	18	30	3	2	7	SAMD13	sterile alpha motif domain containing 13 [Source:HGNC Symbol;Acc:24582]	-2.33406	4.62e-05	0.000603811
ENSG00000165118	620	592	569	456	438	430	C9orf64	chromosome 9 open reading frame 64 [Source:HGNC Symbol;Acc:28144]	-0.427796	4.63e-05	0.000604443
ENSG00000129990	0	0	0	3	7	12	SYT5	synaptotagmin V [Source:HGNC Symbol;Acc:11513]	5.55309	4.71e-05	0.000613954
ENSG00000204611	194	184	185	80	93	89	ZNF616	zinc finger protein 616 [Source:HGNC Symbol;Acc:28062]	-1.13888	4.71e-05	0.000614196
ENSG00000149300	35	42	39	9	22	16	C11orf52	chromosome 11 open reading frame 52 [Source:HGNC Symbol;Acc:30531]	-1.35696	4.73e-05	0.000615353
ENSG00000182986	494	415	449	352	300	285	ZNF320	zinc finger protein 320 [Source:HGNC Symbol;Acc:13842]	-0.55306	4.73e-05	0.000615353
ENSG00000262600	35	42	39	9	22	16	C11orf52	chromosome 11 open reading frame 52 [Source:HGNC Symbol;Acc:30531]	-1.35696	4.73e-05	0.000615353
ENSG00000168916	102	93	83	52	51	54	ZNF608	zinc finger protein 608 [Source:HGNC Symbol;Acc:29238]	-0.815106	4.76e-05	0.000618797
ENSG00000168118	792	764	771	612	643	581	RAB4A	RAB4A, member RAS oncogene family [Source:HGNC Symbol;Acc:9781]	-0.396282	4.76e-05	0.00061908
ENSG00000140961	203	208	202	367	365	360	OSGIN1	oxidative stress induced growth inhibitor 1 [Source:HGNC Symbol;Acc:30093]	0.829417	4.81e-05	0.00062496
ENSG00000175970	1604	1483	1429	1164	1297	1217	UNC119B	unc-119 homolog B (C. elegans) [Source:HGNC Symbol;Acc:16488]	-0.316954	4.87e-05	0.000630578
ENSG00000206493	323	282	289	519	436	538	HLA-E	major histocompatibility complex, class I, E [Source:HGNC Symbol;Acc:4962]	0.73301	4.87e-05	0.000630578
ENSG00000229252	323	282	289	519	436	538	HLA-E	major histocompatibility complex, class I, E [Source:HGNC Symbol;Acc:4962]	0.73301	4.87e-05	0.000630578
ENSG00000230254	323	282	289	519	436	538	HLA-E	major histocompatibility complex, class I, E [Source:HGNC Symbol;Acc:4962]	0.73301	4.87e-05	0.000630578
ENSG00000233904	323	282	289	519	436	538	HLA-E	major histocompatibility complex, class I, E [Source:HGNC Symbol;Acc:4962]	0.73301	4.87e-05	0.000630578
ENSG00000213024	2446	2683	2647	3171	3186	3397	NUP62	nucleoporin 62kDa [Source:HGNC Symbol;Acc:8066]	0.353283	4.9e-05	0.000633309
ENSG00000227507	0	0	0	16	10	4	LTB	lymphotoxin beta (TNF superfamily, member 3) [Source:HGNC Symbol;Acc:6711]	5.99614	4.9e-05	0.000633309
ENSG00000183506	62	58	59	160	82	132	PI4KAP2	phosphatidylinositol 4-kinase, catalytic, alpha pseudogene 2 [Source:HGNC Symbol;Acc:33577]	1.11362	4.97e-05	0.000641591
ENSG00000132819	674	868	818	1210	1360	1273	RBM38	RNA binding motif protein 38 [Source:HGNC Symbol;Acc:15818]	0.698302	4.99e-05	0.000644034
ENSG00000162929	403	407	414	314	301	279	KIAA1841	KIAA1841 [Source:HGNC Symbol;Acc:29387]	-0.453806	5.03e-05	0.000648993
ENSG00000141448	224	254	275	456	460	400	GATA6	GATA binding protein 6 [Source:HGNC Symbol;Acc:4174]	0.783269	5.05e-05	0.00065097
ENSG00000149591	75	61	73	119	125	123	TAGLN	transgelin [Source:HGNC Symbol;Acc:11553]	0.834928	5.07e-05	0.000652398
ENSG00000114767	993	869	951	1159	1220	1271	RRP9	ribosomal RNA processing 9, small subunit (SSU) processome component, homolog (yeast) [Source:HGNC Symbol;Acc:16829]	0.38563	5.11e-05	0.000657248
ENSG00000139990	280	288	252	205	183	221	DCAF5	DDB1 and CUL4 associated factor 5 [Source:HGNC Symbol;Acc:20224]	-0.402892	5.15e-05	0.000662265
ENSG00000012963	1160	1130	1166	832	901	873	UBR7	ubiquitin protein ligase E3 component n-recognin 7 (putative) [Source:HGNC Symbol;Acc:20344]	-0.407307	5.18e-05	0.000665279
ENSG00000160214	186	200	179	258	297	297	RRP1	ribosomal RNA processing 1 [Source:HGNC Symbol;Acc:18785]	0.552998	5.2e-05	0.000667708
ENSG00000115446	523	483	523	379	364	355	UNC50	unc-50 homolog (C. elegans) [Source:HGNC Symbol;Acc:16046]	-0.496928	5.2e-05	0.000667826
ENSG00000038358	1387	1461	1357	1678	1811	1877	EDC4	enhancer of mRNA decapping 4 [Source:HGNC Symbol;Acc:17157]	0.371712	5.29e-05	0.000678111
ENSG00000168010	64	88	93	118	135	153	ATG16L2	autophagy related 16-like 2 (S. cerevisiae) [Source:HGNC Symbol;Acc:25464]	0.742038	5.35e-05	0.000685378
ENSG00000166619	2157	2156	2278	1593	1786	1711	BLCAP	bladder cancer associated protein [Source:HGNC Symbol;Acc:1055]	-0.389865	5.36e-05	0.00068622
ENSG00000166783	543	571	552	426	407	417	KIAA0430	KIAA0430 [Source:HGNC Symbol;Acc:29562]	-0.440547	5.39e-05	0.00069007
ENSG00000138614	1962	1883	1959	1582	1657	1631	VWA9	von Willebrand factor A domain containing 9 [Source:HGNC Symbol;Acc:25372]	-0.254288	5.43e-05	0.000695124
ENSG00000087087	2554	2042	2463	3131	3224	3400	SRRT	serrate RNA effector molecule homolog (Arabidopsis) [Source:HGNC Symbol;Acc:24101]	0.485088	5.45e-05	0.000697076
ENSG00000184661	1025	950	837	607	661	683	CDCA2	cell division cycle associated 2 [Source:HGNC Symbol;Acc:14623]	-0.557948	5.47e-05	0.000699106
ENSG00000166750	803	775	867	1167	1166	1028	SLFN5	schlafen family member 5 [Source:HGNC Symbol;Acc:28286]	0.434841	5.5e-05	0.000701973
ENSG00000181690	234	245	325	138	126	106	PLAG1	pleiomorphic adenoma gene 1 [Source:HGNC Symbol;Acc:9045]	-1.18742	5.53e-05	0.000704527
ENSG00000211445	93	119	113	196	174	188	GPX3	glutathione peroxidase 3 (plasma) [Source:HGNC Symbol;Acc:4555]	0.905874	5.53e-05	0.000704527
ENSG00000131381	501	464	481	379	351	386	ZFYVE20	zinc finger, FYVE domain containing 20 [Source:HGNC Symbol;Acc:20759]	-0.373024	5.55e-05	0.000707081
ENSG00000101191	3644	3907	3548	4568	4518	4487	DIDO1	death inducer-obliterator 1 [Source:HGNC Symbol;Acc:2680]	0.311655	5.59e-05	0.00071117
ENSG00000137877	19	30	23	63	47	51	SPTBN5	spectrin, beta, non-erythrocytic 5 [Source:HGNC Symbol;Acc:15680]	1.19757	5.59e-05	0.00071117
ENSG00000120963	635	613	576	852	847	897	ZNF706	zinc finger protein 706 [Source:HGNC Symbol;Acc:24992]	0.488544	5.65e-05	0.000717831
ENSG00000005469	174	153	150	86	107	64	CROT	carnitine O-octanoyltransferase [Source:HGNC Symbol;Acc:2366]	-1.03777	5.65e-05	0.000718318
ENSG00000143061	836	819	775	1038	994	1021	IGSF3	immunoglobulin superfamily, member 3 [Source:HGNC Symbol;Acc:5950]	0.337201	5.67e-05	0.000719478
ENSG00000177873	133	143	135	83	90	71	ZNF619	zinc finger protein 619 [Source:HGNC Symbol;Acc:26910]	-0.726994	5.72e-05	0.000725459
ENSG00000114270	2	2	0	9	8	17	COL7A1	collagen, type VII, alpha 1 [Source:HGNC Symbol;Acc:2214]	3.13704	5.75e-05	0.000729469
ENSG00000114698	91	100	96	53	61	54	PLSCR4	phospholipid scramblase 4 [Source:HGNC Symbol;Acc:16497]	-0.871687	5.76e-05	0.000730117
ENSG00000042286	639	551	619	443	440	442	AIFM2	apoptosis-inducing factor, mitochondrion-associated, 2 [Source:HGNC Symbol;Acc:21411]	-0.414968	5.77e-05	0.000731237
ENSG00000113845	1284	1290	1338	1025	1078	1110	TIMMDC1	translocase of inner mitochondrial membrane domain containing 1 [Source:HGNC Symbol;Acc:1321]	-0.277994	5.8e-05	0.000733862
ENSG00000197044	121	144	113	51	53	53	ZNF441	zinc finger protein 441 [Source:HGNC Symbol;Acc:20875]	-1.31593	5.81e-05	0.000734163
ENSG00000133059	358	369	378	298	271	247	DSTYK	dual serine/threonine and tyrosine protein kinase [Source:HGNC Symbol;Acc:29043]	-0.45737	5.83e-05	0.000737323
ENSG00000205867	3	2	4	27	32	16	KRTAP5-2	keratin associated protein 5-2 [Source:HGNC Symbol;Acc:23597]	2.93564	5.92e-05	0.000747389
ENSG00000001630	2742	3562	3369	4604	5082	5195	CYP51A1	cytochrome P450, family 51, subfamily A, polypeptide 1 [Source:HGNC Symbol;Acc:2649]	0.635578	5.98e-05	0.000755311
ENSG00000132680	726	742	675	991	848	915	KIAA0907	KIAA0907 [Source:HGNC Symbol;Acc:29145]	0.374755	6.06e-05	0.000763954
ENSG00000163681	1592	1492	1479	1949	2052	1904	SLMAP	sarcolemma associated protein [Source:HGNC Symbol;Acc:16643]	0.361801	6.09e-05	0.000767772
ENSG00000108786	52	54	83	22	27	37	HSD17B1	hydroxysteroid (17-beta) dehydrogenase 1 [Source:HGNC Symbol;Acc:5210]	-1.11182	6.11e-05	0.000769271
ENSG00000130701	44	74	62	25	15	29	RBBP8NL	RBBP8 N-terminal like [Source:HGNC Symbol;Acc:16144]	-1.3581	6.16e-05	0.000775322
ENSG00000235852	22	18	16	55	53	60			1.75633	6.23e-05	0.000784121
ENSG00000175482	409	345	354	674	566	589	POLD4	polymerase (DNA-directed), delta 4, accessory subunit [Source:HGNC Symbol;Acc:14106]	0.804307	6.3e-05	0.000791902
ENSG00000196290	801	715	754	523	560	562	NIF3L1	NIF3 NGG1 interacting factor 3-like 1 (S. cerevisiae) [Source:HGNC Symbol;Acc:13390]	-0.474329	6.32e-05	0.000793957
ENSG00000184857	244	239	254	152	194	173	TMEM186	transmembrane protein 186 [Source:HGNC Symbol;Acc:24530]	-0.526193	6.33e-05	0.000794733
ENSG00000175137	682	733	748	511	508	506	SH3BP5L	SH3-binding domain protein 5-like [Source:HGNC Symbol;Acc:29360]	-0.480066	6.35e-05	0.000796194
ENSG00000181027	445	462	527	668	687	681	FKRP	fukutin related protein [Source:HGNC Symbol;Acc:17997]	0.538236	6.36e-05	0.000797389
ENSG00000241186	50	58	49	23	28	19	TDGF1	teratocarcinoma-derived growth factor 1 [Source:HGNC Symbol;Acc:11701]	-1.22967	6.46e-05	0.000810003
ENSG00000164976	1170	1366	1265	1003	1019	987	KIAA1161	KIAA1161 [Source:HGNC Symbol;Acc:19918]	-0.314287	6.59e-05	0.000825447
ENSG00000240682	1438	1413	1470	1148	1164	1234	ISY1	ISY1 splicing factor homolog (S. cerevisiae) [Source:HGNC Symbol;Acc:29201]	-0.260447	6.63e-05	0.000829482
ENSG00000151065	56	83	76	40	31	45	DCP1B	decapping mRNA 1B [Source:HGNC Symbol;Acc:24451]	-0.85381	6.73e-05	0.000841308
ENSG00000108578	293	273	271	222	207	198	BLMH	bleomycin hydrolase [Source:HGNC Symbol;Acc:1059]	-0.428778	6.74e-05	0.000841616
ENSG00000128422	236	261	249	2506	2424	2536	KRT17	keratin 17 [Source:HGNC Symbol;Acc:6427]	3.40787	6.83e-05	0.000852813
ENSG00000253313	170	152	186	107	101	100	C1orf210	chromosome 1 open reading frame 210 [Source:HGNC Symbol;Acc:28755]	-0.696371	6.85e-05	0.000855048
ENSG00000131791	239	205	238	132	169	109	PRKAB2	protein kinase, AMP-activated, beta 2 non-catalytic subunit [Source:HGNC Symbol;Acc:9379]	-0.815829	6.88e-05	0.000857866
ENSG00000157259	1326	1340	1323	1153	1251	1123	GATAD1	GATA zinc finger domain containing 1 [Source:HGNC Symbol;Acc:29941]	-0.214116	6.89e-05	0.000858256
ENSG00000136371	484	409	473	344	305	319	MTHFS	5,10-methenyltetrahydrofolate synthetase (5-formyltetrahydrofolate cyclo-ligase) [Source:HGNC Symbol;Acc:7437]	-0.517974	6.91e-05	0.000861177
ENSG00000197128	42	43	43	14	8	20	ZNF772	zinc finger protein 772 [Source:HGNC Symbol;Acc:33106]	-1.55723	7.11e-05	0.000885303
ENSG00000233841	0	5	1	39	58	4	HLA-C	major histocompatibility complex, class I, C [Source:HGNC Symbol;Acc:4933]	3.61713	7.2e-05	0.000895713
ENSG00000141428	188	162	176	110	141	116	C18orf21	chromosome 18 open reading frame 21 [Source:HGNC Symbol;Acc:28802]	-0.602755	7.22e-05	0.000897109
ENSG00000164171	5473	4851	4916	7688	7458	7798	ITGA2	integrin, alpha 2 (CD49B, alpha 2 subunit of VLA-2 receptor) [Source:HGNC Symbol;Acc:6137]	0.583424	7.3e-05	0.000906403
ENSG00000123179	731	686	850	614	619	565	EBPL	emopamil binding protein-like [Source:HGNC Symbol;Acc:18061]	-0.385746	7.31e-05	0.000907531
ENSG00000090857	677	680	631	527	521	545	PDPR	pyruvate dehydrogenase phosphatase regulatory subunit [Source:HGNC Symbol;Acc:30264]	-0.303291	7.35e-05	0.00091139
ENSG00000117318	5	4	4	13	19	16	ID3	inhibitor of DNA binding 3, dominant negative helix-loop-helix protein [Source:HGNC Symbol;Acc:5362]	1.93156	7.42e-05	0.000920333
ENSG00000175866	1030	1120	1079	1427	1616	1551	BAIAP2	BAI1-associated protein 2 [Source:HGNC Symbol;Acc:947]	0.5324	7.43e-05	0.000921034
ENSG00000176678	9	5	4	18	19	21	FOXL1	forkhead box L1 [Source:HGNC Symbol;Acc:3817]	1.69223	7.45e-05	0.000922437
ENSG00000067798	35	42	49	84	67	79	NAV3	neuron navigator 3 [Source:HGNC Symbol;Acc:15998]	0.870628	7.49e-05	0.00092721
ENSG00000176531	84	96	122	164	155	173	PHLDB3	pleckstrin homology-like domain, family B, member 3 [Source:HGNC Symbol;Acc:30499]	0.766491	7.54e-05	0.000932085
ENSG00000023697	983	941	983	797	799	821	DERA	deoxyribose-phosphate aldolase (putative) [Source:HGNC Symbol;Acc:24269]	-0.27847	7.59e-05	0.000937375
ENSG00000255104	0	0	0	19	24	7	ZNF286A	zinc finger protein 286A [Source:HGNC Symbol;Acc:13501]	6.49844	7.63e-05	0.000941798
ENSG00000198792	858	902	906	1207	1238	1279	TMEM184B	transmembrane protein 184B [Source:HGNC Symbol;Acc:1310]	0.485878	7.63e-05	0.000941944
ENSG00000186026	91	80	76	46	36	29	ZNF284	zinc finger protein 284 [Source:HGNC Symbol;Acc:13078]	-1.19769	7.69e-05	0.000948086
ENSG00000131626	2836	2820	2794	3370	3446	3469	PPFIA1	protein tyrosine phosphatase, receptor type, f polypeptide (PTPRF), interacting protein (liprin), alpha 1 [Source:HGNC Symbol;Acc:9245]	0.281092	7.79e-05	0.000959859
ENSG00000152804	22	38	26	8	15	11	HHEX	hematopoietically expressed homeobox [Source:HGNC Symbol;Acc:4901]	-1.34073	7.86e-05	0.000968126
ENSG00000228109	3	3	3	21	9	14	MFI2-AS1	MFI2 antisense RNA 1 [Source:HGNC Symbol;Acc:40373]	2.34893	7.87e-05	0.000969022
ENSG00000261577	1965	2163	2198	2586	2835	3008	JUP	junction plakoglobin [Source:HGNC Symbol;Acc:6207]	0.446839	7.91e-05	0.000972785
ENSG00000011132	65	77	69	111	137	142	APBA3	amyloid beta (A4) precursor protein-binding, family A, member 3 [Source:HGNC Symbol;Acc:580]	0.92199	8.01e-05	0.000985019
ENSG00000121039	1210	1213	1248	1586	1604	1470	RDH10	retinol dehydrogenase 10 (all-trans) [Source:HGNC Symbol;Acc:19975]	0.306472	8.04e-05	0.000987394
ENSG00000135763	1701	1690	1705	2008	2054	2005	URB2	URB2 ribosome biogenesis 2 homolog (S. cerevisiae) [Source:HGNC Symbol;Acc:28967]	0.247963	8.08e-05	0.000992262
ENSG00000185090	682	721	739	485	530	551	MANEAL	mannosidase, endo-alpha-like [Source:HGNC Symbol;Acc:26452]	-0.416726	8.34e-05	0.00102325
ENSG00000087269	2569	2653	2764	3200	3254	3490	NOP14	NOP14 nucleolar protein [Source:HGNC Symbol;Acc:16821]	0.340138	8.36e-05	0.00102473
ENSG00000142156	6	0	1	11	11	16	COL6A1	collagen, type VI, alpha 1 [Source:HGNC Symbol;Acc:2211]	2.46766	8.37e-05	0.0010255
ENSG00000139835	420	449	467	344	351	350	GRTP1	growth hormone regulated TBC protein 1 [Source:HGNC Symbol;Acc:20310]	-0.370642	8.44e-05	0.00103358
ENSG00000163795	178	186	160	259	270	246	ZNF513	zinc finger protein 513 [Source:HGNC Symbol;Acc:26498]	0.60553	8.55e-05	0.00104617
ENSG00000171790	7	10	3	18	20	21	SLFNL1	schlafen-like 1 [Source:HGNC Symbol;Acc:26313]	1.73532	8.62e-05	0.00105364
ENSG00000176714	82	61	80	42	26	27	CCDC121	coiled-coil domain containing 121 [Source:HGNC Symbol;Acc:25833]	-1.19107	8.65e-05	0.00105689
ENSG00000255529	1302	1416	1460	1046	1063	913	POLR2M	polymerase (RNA) II (DNA directed) polypeptide M [Source:HGNC Symbol;Acc:14862]	-0.513931	8.67e-05	0.00105909
ENSG00000167703	298	350	342	480	463	467	SLC43A2	solute carrier family 43 (amino acid system L transporter), member 2 [Source:HGNC Symbol;Acc:23087]	0.53182	8.69e-05	0.00106062
ENSG00000161547	5669	5793	6457	7020	7064	7194	SRSF2	serine/arginine-rich splicing factor 2 [Source:HGNC Symbol;Acc:10783]	0.244668	8.78e-05	0.00107059
ENSG00000103855	1158	1428	1166	1634	1620	1794	CD276	CD276 molecule [Source:HGNC Symbol;Acc:19137]	0.462721	8.83e-05	0.00107639
ENSG00000135775	855	812	801	614	667	653	COG2	component of oligomeric golgi complex 2 [Source:HGNC Symbol;Acc:6546]	-0.342	8.9e-05	0.00108415
ENSG00000188242	517	558	524	364	396	393		Uncharacterized protein [Source:UniProtKB/TrEMBL;Acc:D6RHG8]	-0.452423	8.91e-05	0.00108432
ENSG00000182378	366	375	381	522	469	492	PLCXD1	phosphatidylinositol-specific phospholipase C, X domain containing 1 [Source:HGNC Symbol;Acc:23148]	0.418873	8.94e-05	0.00108796
ENSG00000042088	465	450	466	360	357	360	TDP1	tyrosyl-DNA phosphodiesterase 1 [Source:HGNC Symbol;Acc:18884]	-0.331216	8.98e-05	0.00109185
ENSG00000107021	485	478	492	329	369	325	TBC1D13	TBC1 domain family, member 13 [Source:HGNC Symbol;Acc:25571]	-0.522506	8.99e-05	0.0010921
ENSG00000092847	1034	1075	1059	949	850	887	AGO1	argonaute RISC catalytic component 1 [Source:HGNC Symbol;Acc:3262]	-0.217971	9.05e-05	0.00109952
ENSG00000110013	374	419	414	326	313	310	SIAE	sialic acid acetylesterase [Source:HGNC Symbol;Acc:18187]	-0.361617	9.09e-05	0.00110335
ENSG00000084092	864	895	835	703	692	757	NOA1	nitric oxide associated 1 [Source:HGNC Symbol;Acc:28473]	-0.268543	9.1e-05	0.00110384
ENSG00000163626	387	413	373	288	316	291	COX18	COX18 cytochrome C oxidase assembly factor [Source:HGNC Symbol;Acc:26801]	-0.43248	9.16e-05	0.00111042
ENSG00000172071	887	829	791	1278	1233	1248	EIF2AK3	eukaryotic translation initiation factor 2-alpha kinase 3 [Source:HGNC Symbol;Acc:3255]	0.600923	9.17e-05	0.00111042
ENSG00000103199	139	158	143	90	77	90	ZNF500	zinc finger protein 500 [Source:HGNC Symbol;Acc:23716]	-0.722425	9.25e-05	0.00111963
ENSG00000235106	157	206	198	117	124	111	LINC00094	long intergenic non-protein coding RNA 94 [Source:HGNC Symbol;Acc:24742]	-0.650676	9.42e-05	0.00113959
ENSG00000167676	120	138	99	194	208	166	PLIN4	perilipin 4 [Source:HGNC Symbol;Acc:29393]	0.686037	9.45e-05	0.00114204
ENSG00000173801	1965	2163	2198	2586	2835	3008	JUP	junction plakoglobin [Source:HGNC Symbol;Acc:6207]	0.445322	9.46e-05	0.00114282
ENSG00000231345	233	224	265	154	155	174			-0.553475	9.57e-05	0.00115495
ENSG00000137073	921	850	820	1002	1052	1129	UBAP2	ubiquitin associated protein 2 [Source:HGNC Symbol;Acc:14185]	0.324864	9.57e-05	0.00115526
ENSG00000214617	8	10	10	38	20	20	SLC6A10P	solute carrier family 6 (neurotransmitter transporter), member 10, pseudogene [Source:HGNC Symbol;Acc:11043]	1.64115	9.61e-05	0.00115874
ENSG00000154447	1290	1337	1331	1504	1651	1666	SH3RF1	SH3 domain containing ring finger 1 [Source:HGNC Symbol;Acc:17650]	0.274155	9.77e-05	0.00117736
ENSG00000139278	211	215	206	494	439	444	GLIPR1	GLI pathogenesis-related 1 [Source:HGNC Symbol;Acc:17001]	1.10246	9.85e-05	0.00118647
ENSG00000164109	2610	2419	2750	1858	1870	1661	MAD2L1	MAD2 mitotic arrest deficient-like 1 (yeast) [Source:HGNC Symbol;Acc:6763]	-0.617628	0.0001	0.00120351
ENSG00000168876	357	350	368	228	209	225	ANKRD49	ankyrin repeat domain 49 [Source:HGNC Symbol;Acc:25970]	-0.73199	0.000100829	0.00121276
ENSG00000152413	856	910	771	1236	1238	1109	HOMER1	homer homolog 1 (Drosophila) [Source:HGNC Symbol;Acc:17512]	0.440939	0.000100942	0.00121336
ENSG00000103222	1094	1075	1046	1353	1281	1322	ABCC1	ATP-binding cassette, sub-family C (CFTR/MRP), member 1 [Source:HGNC Symbol;Acc:51]	0.337982	0.000101025	0.00121358
ENSG00000169252	34	36	26	71	58	70	ADRB2	adrenoceptor beta 2, surface [Source:HGNC Symbol;Acc:286]	1.07727	0.000101598	0.00121969
ENSG00000141542	150	151	156	105	107	93	RAB40B	RAB40B, member RAS oncogene family [Source:HGNC Symbol;Acc:18284]	-0.658303	0.000103689	0.00124298
ENSG00000165672	5388	5203	6001	4661	4991	4368	PRDX3	peroxiredoxin 3 [Source:HGNC Symbol;Acc:9354]	-0.323797	0.000103735	0.00124298
ENSG00000223482	473	466	411	601	510	595	NUTM2A-AS1	NUTM2A antisense RNA 1 [Source:HGNC Symbol;Acc:45161]	0.36721	0.000103725	0.00124298
ENSG00000089639	199	201	188	281	280	328	GMIP	GEM interacting protein [Source:HGNC Symbol;Acc:24852]	0.629531	0.000104161	0.0012473
ENSG00000138271	193	196	199	243	309	298	GPR87	G protein-coupled receptor 87 [Source:HGNC Symbol;Acc:4538]	0.478172	0.000104307	0.00124826
ENSG00000125730	0	0	0	8	2	6	C3	complement component 3 [Source:HGNC Symbol;Acc:1318]	4.90332	0.000104795	0.00125331
ENSG00000115657	436	405	403	291	308	327	ABCB6	ATP-binding cassette, sub-family B (MDR/TAP), member 6 [Source:HGNC Symbol;Acc:47]	-0.420959	0.00010519	0.00125565
ENSG00000115844	2	3	0	14	8	12	DLX2	distal-less homeobox 2 [Source:HGNC Symbol;Acc:2915]	2.81913	0.000105125	0.00125565
ENSG00000179918	465	487	431	273	354	334	SEPHS2	selenophosphate synthetase 2 [Source:HGNC Symbol;Acc:19686]	-0.544474	0.000105082	0.00125565
ENSG00000146909	809	786	727	973	914	942	NOM1	nucleolar protein with MIF4G domain 1 [Source:HGNC Symbol;Acc:13244]	0.273934	0.000105765	0.00126172
ENSG00000088305	88	123	119	65	61	82	DNMT3B	DNA (cytosine-5-)-methyltransferase 3 beta [Source:HGNC Symbol;Acc:2979]	-0.642049	0.000108174	0.00128964
ENSG00000236683	55	76	72	90	120	124	HMGA1P1	high mobility group AT-hook 1 pseudogene 1 [Source:HGNC Symbol;Acc:13321]	0.731673	0.000108308	0.00129043
ENSG00000150995	142	149	119	202	171	204	ITPR1	inositol 1,4,5-trisphosphate receptor, type 1 [Source:HGNC Symbol;Acc:6180]	0.525287	0.000109073	0.00129792
ENSG00000188917	922	849	827	598	629	694	TRMT2B	tRNA methyltransferase 2 homolog B (S. cerevisiae) [Source:HGNC Symbol;Acc:25748]	-0.427376	0.00010902	0.00129792
ENSG00000184675	156	176	159	111	127	104	AMER1	APC membrane recruitment protein 1 [Source:HGNC Symbol;Acc:26837]	-0.529752	0.000109892	0.00130684
ENSG00000214193	114	139	100	219	158	196	SH3D21	SH3 domain containing 21 [Source:HGNC Symbol;Acc:26236]	0.769829	0.000110307	0.00131095
ENSG00000214013	159	152	150	93	120	102	GANC	glucosidase, alpha; neutral C [Source:HGNC Symbol;Acc:4139]	-0.574738	0.000110649	0.00131419
ENSG00000101104	224	226	248	300	292	299	PABPC1L	poly(A) binding protein, cytoplasmic 1-like [Source:HGNC Symbol;Acc:15797]	0.41525	0.000110997	0.00131584
ENSG00000104738	11138	10825	11627	9329	9812	8991	MCM4	minichromosome maintenance complex component 4 [Source:HGNC Symbol;Acc:6947]	-0.284846	0.000110958	0.00131584
ENSG00000198924	924	858	777	501	565	475	DCLRE1A	DNA cross-link repair 1A [Source:HGNC Symbol;Acc:17660]	-0.817339	0.000110891	0.00131584
ENSG00000145103	132	140	150	81	81	90	ILDR1	immunoglobulin-like domain containing receptor 1 [Source:HGNC Symbol;Acc:28741]	-0.695672	0.000111332	0.00131899
ENSG00000137403	21	5	11	45	28	39	HLA-F	major histocompatibility complex, class I, F [Source:HGNC Symbol;Acc:4963]	1.62404	0.000112974	0.00133762
ENSG00000134901	84	61	86	43	39	48	KDELC1	KDEL (Lys-Asp-Glu-Leu) containing 1 [Source:HGNC Symbol;Acc:19350]	-0.849828	0.000113745	0.0013459
ENSG00000204070	1227	1268	1260	1414	1605	1595	SYS1	SYS1 Golgi-localized integral membrane protein homolog (S. cerevisiae) [Source:HGNC Symbol;Acc:16162]	0.286029	0.000114178	0.00135018
ENSG00000111671	124	150	139	82	73	100	SPSB2	splA/ryanodine receptor domain and SOCS box containing 2 [Source:HGNC Symbol;Acc:29522]	-0.644541	0.000115653	0.00136529
ENSG00000184992	4236	4333	4596	3813	3643	3448	BRI3BP	BRI3 binding protein [Source:HGNC Symbol;Acc:14251]	-0.310801	0.000115672	0.00136529
ENSG00000254708	3	4	0	38	18	15			3.32061	0.000115654	0.00136529
ENSG00000260727	5	4	4	14	15	26	SLC7A5P1	solute carrier family 7 (amino acid transporter light chain, L system), member 5 pseudogene 1 [Source:HGNC Symbol;Acc:29458]	2.15827	0.000115744	0.00136529
ENSG00000141497	5	3	3	14	14	22	ZMYND15	zinc finger, MYND-type containing 15 [Source:HGNC Symbol;Acc:20997]	2.14965	0.000118043	0.00139154
ENSG00000067182	960	995	983	1229	1372	1380	TNFRSF1A	tumor necrosis factor receptor superfamily, member 1A [Source:HGNC Symbol;Acc:11916]	0.441541	0.000119432	0.00140704
ENSG00000134644	2318	2182	2286	2646	2544	2683	PUM1	pumilio RNA-binding family member 1 [Source:HGNC Symbol;Acc:14957]	0.227376	0.000119953	0.0014123
ENSG00000088832	2346	2264	2386	2092	2168	2085	FKBP1A	FK506 binding protein 1A, 12kDa [Source:HGNC Symbol;Acc:3711]	-0.181799	0.000120541	0.00141835
ENSG00000127511	286	296	291	383	382	377	SIN3B	SIN3 transcription regulator family member B [Source:HGNC Symbol;Acc:19354]	0.42548	0.000120867	0.00142129
ENSG00000187801	32	40	34	14	16	10	ZFP69B	ZFP69 zinc finger protein B [Source:HGNC Symbol;Acc:28053]	-1.56892	0.000121114	0.00142332
ENSG00000174145	7	10	10	48	35	29	KIAA1239	KIAA1239 [Source:HGNC Symbol;Acc:29229]	2.07837	0.000122702	0.00144108
ENSG00000089916	756	765	757	1016	1066	976	GPATCH2L	G patch domain containing 2-like [Source:HGNC Symbol;Acc:20210]	0.408446	0.000123027	0.001444
ENSG00000148229	3784	3452	3608	3084	3334	3224	POLE3	polymerase (DNA directed), epsilon 3, accessory subunit [Source:HGNC Symbol;Acc:13546]	-0.198987	0.000123539	0.00144911
ENSG00000158792	225	274	284	451	443	475	SPATA2L	spermatogenesis associated 2-like [Source:HGNC Symbol;Acc:28393]	0.850823	0.000124235	0.00145638
ENSG00000215769	115	112	118	175	158	170		hsa-mir-6080 [Source:miRBase;Acc:MI0020357]	0.575029	0.000124995	0.00146438
ENSG00000105953	2964	2882	2992	3443	3869	3887	OGDH	oxoglutarate (alpha-ketoglutarate) dehydrogenase (lipoamide) [Source:HGNC Symbol;Acc:8124]	0.362208	0.00012517	0.00146553
ENSG00000168970	85	99	102	57	52	62	JMJD7-PLA2G4B	JMJD7-PLA2G4B readthrough [Source:HGNC Symbol;Acc:34449]	-0.687529	0.000125695	0.00147077
ENSG00000120539	1251	1262	1281	1874	1966	1788	MASTL	microtubule associated serine/threonine kinase-like [Source:HGNC Symbol;Acc:19042]	0.535974	0.000126892	0.00148385
ENSG00000164442	66	63	80	138	118	121	CITED2	Cbp/p300-interacting transactivator, with Glu/Asp-rich carboxy-terminal domain, 2 [Source:HGNC Symbol;Acc:1987]	0.800593	0.000126977	0.00148393
ENSG00000188112	509	516	537	691	648	662	C6orf132	chromosome 6 open reading frame 132 [Source:HGNC Symbol;Acc:21288]	0.40643	0.000128386	0.00149947
ENSG00000130396	3639	3646	3449	4404	4052	4219	MLLT4	myeloid/lymphoid or mixed-lineage leukemia (trithorax homolog, Drosophila); translocated to, 4 [Source:HGNC Symbol;Acc:7137]	0.250685	0.000128862	0.0015041
ENSG00000109519	1139	1130	1070	1288	1374	1363	GRPEL1	GrpE-like 1, mitochondrial (E. coli) [Source:HGNC Symbol;Acc:19696]	0.281903	0.000129956	0.00151594
ENSG00000243646	325	311	312	432	437	429	IL10RB	interleukin 10 receptor, beta [Source:HGNC Symbol;Acc:5965]	0.454001	0.000130677	0.00152341
ENSG00000171970	252	240	239	138	174	184	ZNF57	zinc finger protein 57 [Source:HGNC Symbol;Acc:13125]	-0.583871	0.000131687	0.00153424
ENSG00000143476	1493	1496	1482	1032	1120	1122	DTL	denticleless E3 ubiquitin protein ligase homolog (Drosophila) [Source:HGNC Symbol;Acc:30288]	-0.466054	0.000131796	0.00153457
ENSG00000134077	785	711	727	567	533	516	THUMPD3	THUMP domain containing 3 [Source:HGNC Symbol;Acc:24493]	-0.506967	0.000131947	0.00153538
ENSG00000064115	3555	3492	3633	2972	3183	2988	TM7SF3	transmembrane 7 superfamily member 3 [Source:HGNC Symbol;Acc:23049]	-0.257889	0.000132533	0.00154125
ENSG00000170439	252	226	248	144	149	169	METTL7B	methyltransferase like 7B [Source:HGNC Symbol;Acc:28276]	-0.575136	0.000133662	0.00155344
ENSG00000006555	280	290	291	191	217	195	TTC22	tetratricopeptide repeat domain 22 [Source:HGNC Symbol;Acc:26067]	-0.534517	0.000134001	0.00155547
ENSG00000089060	52	89	76	128	109	116	SLC8B1	solute carrier family 8 (sodium/lithium/calcium exchanger), member B1 [Source:HGNC Symbol;Acc:26175]	0.741396	0.000133972	0.00155547
ENSG00000096433	5710	6172	5859	7074	7152	7544	ITPR3	inositol 1,4,5-trisphosphate receptor, type 3 [Source:HGNC Symbol;Acc:6182]	0.317837	0.000134091	0.00155555
ENSG00000179029	179	223	176	262	271	277	TMEM107	transmembrane protein 107 [Source:HGNC Symbol;Acc:28128]	0.518471	0.000135559	0.00157162
ENSG00000120333	535	484	459	360	394	362	MRPS14	mitochondrial ribosomal protein S14 [Source:HGNC Symbol;Acc:14049]	-0.425057	0.000136861	0.00158574
ENSG00000136122	1306	1203	1164	628	671	598	BORA	bora, aurora kinase A activator [Source:HGNC Symbol;Acc:24724]	-0.998483	0.000137966	0.00159757
ENSG00000197081	3411	3534	3302	4231	3900	4064	IGF2R	insulin-like growth factor 2 receptor [Source:HGNC Symbol;Acc:5467]	0.271161	0.000138647	0.00160448
ENSG00000196374	1456	1384	1493	889	992	1080	HIST1H2BM	histone cluster 1, H2bm [Source:HGNC Symbol;Acc:4750]	-0.530265	0.000138981	0.00160736
ENSG00000125170	1698	1699	1834	1390	1447	1364	DOK4	docking protein 4 [Source:HGNC Symbol;Acc:19868]	-0.306958	0.000140193	0.00161941
ENSG00000180423	193	179	229	131	108	118	HARBI1	harbinger transposase derived 1 [Source:HGNC Symbol;Acc:26522]	-0.712329	0.000140166	0.00161941
ENSG00000162222	475	438	483	347	311	356	TTC9C	tetratricopeptide repeat domain 9C [Source:HGNC Symbol;Acc:28432]	-0.413803	0.000140365	0.00162039
ENSG00000234616	590	715	599	355	340	385	JRK	jerky homolog (mouse) [Source:HGNC Symbol;Acc:6199]	-0.761781	0.000140601	0.00162213
ENSG00000166831	1	0	0	11	8	8	RBPMS2	RNA binding protein with multiple splicing 2 [Source:HGNC Symbol;Acc:19098]	4.73	0.000141872	0.0016358
ENSG00000143457	736	576	699	417	454	428	GOLPH3L	golgi phosphoprotein 3-like [Source:HGNC Symbol;Acc:24882]	-0.654326	0.000143117	0.00164916
ENSG00000091732	489	511	496	361	387	387	ZC3HC1	zinc finger, C3HC-type containing 1 [Source:HGNC Symbol;Acc:29913]	-0.383371	0.000144525	0.00166436
ENSG00000262342	182	242	294	122	145	126	VPS11	vacuolar protein sorting 11 homolog (S. cerevisiae) [Source:HGNC Symbol;Acc:14583]	-0.840444	0.000145424	0.0016737
ENSG00000180035	507	533	509	334	355	351	ZNF48	zinc finger protein 48 [Source:HGNC Symbol;Acc:13114]	-0.54784	0.000146107	0.00168055
ENSG00000134697	2378	2118	2134	2808	2683	3088	GNL2	guanine nucleotide binding protein-like 2 (nucleolar) [Source:HGNC Symbol;Acc:29925]	0.404745	0.000146408	0.00168197
ENSG00000273443	1	1	4	8	14	22			3.02757	0.000146338	0.00168197
ENSG00000168612	286	247	281	209	201	193	ZSWIM1	zinc finger, SWIM-type containing 1 [Source:HGNC Symbol;Acc:16155]	-0.43562	0.000146668	0.00168393
ENSG00000113645	2157	2146	2069	2577	2534	2586	WWC1	WW and C2 domain containing 1 [Source:HGNC Symbol;Acc:29435]	0.279509	0.000146864	0.00168516
ENSG00000110721	1063	1065	1058	1345	1422	1259	CHKA	choline kinase alpha [Source:HGNC Symbol;Acc:1937]	0.295897	0.000147914	0.00169618
ENSG00000114554	2878	3583	3292	4431	4186	4482	PLXNA1	plexin A1 [Source:HGNC Symbol;Acc:9099]	0.459499	0.000148436	0.00170113
ENSG00000080546	363	345	371	215	210	203	SESN1	sestrin 1 [Source:HGNC Symbol;Acc:21595]	-0.80726	0.000149719	0.0017148
ENSG00000171425	328	372	377	230	216	232	ZNF581	zinc finger protein 581 [Source:HGNC Symbol;Acc:25017]	-0.657927	0.000149902	0.00171586
ENSG00000256018	4222	3940	4095	2371	2939	2940	HIST1H3G	histone cluster 1, H3g [Source:HGNC Symbol;Acc:4772]	-0.550521	0.000150259	0.0017189
ENSG00000185101	274	323	332	458	414	506	ANO9	anoctamin 9 [Source:HGNC Symbol;Acc:20679]	0.628453	0.00015126	0.00172931
ENSG00000197852	176	143	135	215	208	202	FAM212B	family with sequence similarity 212, member B [Source:HGNC Symbol;Acc:28045]	0.485383	0.000152082	0.00173766
ENSG00000256294	106	96	82	37	45	36	ZNF225	zinc finger protein 225 [Source:HGNC Symbol;Acc:13018]	-1.33224	0.000152326	0.0017394
ENSG00000124920	719	869	784	988	961	1056	MYRF	myelin regulatory factor [Source:HGNC Symbol;Acc:1181]	0.394116	0.000152771	0.00174343
ENSG00000157617	419	407	433	538	506	540	C2CD2	C2 calcium-dependent domain containing 2 [Source:HGNC Symbol;Acc:1266]	0.330531	0.000153228	0.00174759
ENSG00000168906	5079	4771	4593	6123	5995	6519	MAT2A	methionine adenosyltransferase II, alpha [Source:HGNC Symbol;Acc:6904]	0.355743	0.000154438	0.00176033
ENSG00000178401	315	281	289	192	224	198	DNAJC22	DnaJ (Hsp40) homolog, subfamily C, member 22 [Source:HGNC Symbol;Acc:25802]	-0.562018	0.000155263	0.00176867
ENSG00000142082	157	134	173	95	102	110	SIRT3	sirtuin 3 [Source:HGNC Symbol;Acc:14931]	-0.56569	0.00015683	0.00178545
ENSG00000226479	781	809	833	1002	1033	960	TMEM185B	transmembrane protein 185B [Source:HGNC Symbol;Acc:18896]	0.283027	0.000157881	0.00179633
ENSG00000108468	2459	2405	2225	2068	2095	1998	CBX1	chromobox homolog 1 [Source:HGNC Symbol;Acc:1551]	-0.223544	0.000160325	0.00182305
ENSG00000115507	22	13	29	10	1	7	OTX1	orthodenticle homeobox 1 [Source:HGNC Symbol;Acc:8521]	-1.79207	0.000162541	0.00184714
ENSG00000171206	581	626	659	747	822	909	TRIM8	tripartite motif containing 8 [Source:HGNC Symbol;Acc:15579]	0.426963	0.000163475	0.00185663
ENSG00000136943	291	275	255	336	380	362	CTSV	cathepsin V [Source:HGNC Symbol;Acc:2538]	0.402862	0.000163626	0.00185724
ENSG00000154767	455	509	473	304	351	377	XPC	xeroderma pigmentosum, complementation group C [Source:HGNC Symbol;Acc:12816]	-0.452645	0.000164899	0.00187056
ENSG00000119185	1160	1167	1191	976	984	1053	ITGB1BP1	integrin beta 1 binding protein 1 [Source:HGNC Symbol;Acc:23927]	-0.220005	0.000165878	0.00188055
ENSG00000168685	6	6	4	18	27	17	IL7R	interleukin 7 receptor [Source:HGNC Symbol;Acc:6024]	1.94306	0.000166227	0.00188337
ENSG00000169371	898	897	823	674	712	685	SNUPN	snurportin 1 [Source:HGNC Symbol;Acc:14245]	-0.321872	0.000166812	0.00188888
ENSG00000092208	264	262	255	197	216	180	GEMIN2	gem (nuclear organelle) associated protein 2 [Source:HGNC Symbol;Acc:10884]	-0.453171	0.000167176	0.00189187
ENSG00000052795	920	965	1035	804	801	732	FNIP2	folliculin interacting protein 2 [Source:HGNC Symbol;Acc:29280]	-0.327343	0.000168952	0.00191082
ENSG00000188283	110	98	87	52	49	56	ZNF383	zinc finger protein 383 [Source:HGNC Symbol;Acc:18609]	-0.89414	0.000169168	0.00191212
ENSG00000243406	127	155	149	81	83	98	MRPS31P5	mitochondrial ribosomal protein S31 pseudogene 5 [Source:HGNC Symbol;Acc:39253]	-0.78737	0.000169321	0.00191271
ENSG00000239920	4	0	0	14	7	13			3.26119	0.000171538	0.0019366
ENSG00000168928	3	2	0	14	12	13	CTRB2	chymotrypsinogen B2 [Source:HGNC Symbol;Acc:2522]	3.04649	0.000172782	0.00194948
ENSG00000196456	114	99	132	53	66	71	ZNF775	zinc finger protein 775 [Source:HGNC Symbol;Acc:28501]	-0.879337	0.000173074	0.00195162
ENSG00000100139	649	740	655	889	850	817	MICALL1	MICAL-like 1 [Source:HGNC Symbol;Acc:29804]	0.366475	0.000173659	0.00195704
ENSG00000171467	402	456	347	279	279	308	ZNF318	zinc finger protein 318 [Source:HGNC Symbol;Acc:13578]	-0.462046	0.000174694	0.00196754
ENSG00000156873	502	515	519	620	624	709	PHKG2	phosphorylase kinase, gamma 2 (testis) [Source:HGNC Symbol;Acc:8931]	0.380324	0.000175107	0.00197102
ENSG00000132467	751	742	725	931	937	939	UTP3	UTP3, small subunit (SSU) processome component, homolog (S. cerevisiae) [Source:HGNC Symbol;Acc:24477]	0.318159	0.00017763	0.00199824
ENSG00000155984	422	441	446	326	350	335	TMEM185A	transmembrane protein 185A [Source:HGNC Symbol;Acc:17125]	-0.37377	0.000178176	0.00200318
ENSG00000183778	47	57	57	17	24	29	B3GALT5	UDP-Gal:betaGlcNAc beta 1,3-galactosyltransferase, polypeptide 5 [Source:HGNC Symbol;Acc:920]	-1.20375	0.000179707	0.0020192
ENSG00000109111	2283	2270	2124	2708	2670	2766	SUPT6H	suppressor of Ty 6 homolog (S. cerevisiae) [Source:HGNC Symbol;Acc:11470]	0.301037	0.00018007	0.00202088
ENSG00000146592	13	14	10	38	32	30	CREB5	cAMP responsive element binding protein 5 [Source:HGNC Symbol;Acc:16844]	1.52698	0.000180052	0.00202088
ENSG00000211460	2941	2810	3012	2506	2399	2220	TSN	translin [Source:HGNC Symbol;Acc:12379]	-0.344951	0.000181587	0.0020367
ENSG00000120075	47	54	32	19	19	22	HOXB5	homeobox B5 [Source:HGNC Symbol;Acc:5116]	-1.15965	0.000182461	0.00204458
ENSG00000136193	1874	1814	1780	1511	1578	1568	SCRN1	secernin 1 [Source:HGNC Symbol;Acc:22192]	-0.252264	0.000182505	0.00204458
ENSG00000134352	3502	3639	3793	8569	8247	7272	IL6ST	interleukin 6 signal transducer (gp130, oncostatin M receptor) [Source:HGNC Symbol;Acc:6021]	1.06635	0.000184339	0.0020639
ENSG00000175938	151	160	228	95	115	104	ORAI3	ORAI calcium release-activated calcium modulator 3 [Source:HGNC Symbol;Acc:28185]	-0.801492	0.000185132	0.00207155
ENSG00000084090	7356	7089	7203	6477	6558	6406	STARD7	StAR-related lipid transfer (START) domain containing 7 [Source:HGNC Symbol;Acc:18063]	-0.173301	0.000185606	0.00207563
ENSG00000187257	1058	1015	1056	709	768	640	RSBN1L	round spermatid basic protein 1-like [Source:HGNC Symbol;Acc:24765]	-0.632271	0.000186097	0.0020799
ENSG00000109790	246	243	248	424	393	372	KLHL5	kelch-like family member 5 [Source:HGNC Symbol;Acc:6356]	0.692956	0.000186467	0.00208157
ENSG00000172409	704	687	613	501	553	558	CLP1	cleavage and polyadenylation factor I subunit 1 [Source:HGNC Symbol;Acc:16999]	-0.338809	0.000186435	0.00208157
ENSG00000149636	1305	1260	1439	927	881	944	DSN1	DSN1, MIS12 kinetochore complex component [Source:HGNC Symbol;Acc:16165]	-0.514238	0.00018845	0.00210247
ENSG00000184357	15513	15155	14860	10260	11563	12028	HIST1H1B	histone cluster 1, H1b [Source:HGNC Symbol;Acc:4719]	-0.409866	0.000188929	0.00210658
ENSG00000074660	13	19	19	34	37	53	SCARF1	scavenger receptor class F, member 1 [Source:HGNC Symbol;Acc:16820]	1.34178	0.000190656	0.00212458
ENSG00000237515	54	70	39	133	134	105	SHISA9	shisa family member 9 [Source:HGNC Symbol;Acc:37231]	1.06784	0.000191041	0.00212762
ENSG00000173653	604	617	582	719	865	799	RCE1	Ras converting CAAX endopeptidase 1 [Source:HGNC Symbol;Acc:13721]	0.434378	0.00019389	0.00215808
ENSG00000114867	15043	15177	14420	17712	18529	19398	EIF4G1	eukaryotic translation initiation factor 4 gamma, 1 [Source:HGNC Symbol;Acc:3296]	0.34043	0.000195003	0.0021692
ENSG00000197965	1925	1981	1854	1599	1660	1705	MPZL1	myelin protein zero-like 1 [Source:HGNC Symbol;Acc:7226]	-0.238818	0.000198391	0.00220558
ENSG00000100417	248	227	229	160	178	152	PMM1	phosphomannomutase 1 [Source:HGNC Symbol;Acc:9114]	-0.54576	0.000199608	0.00221652
ENSG00000115758	12283	11479	12215	14883	15572	15982	ODC1	ornithine decarboxylase 1 [Source:HGNC Symbol;Acc:8109]	0.356766	0.000199591	0.00221652
ENSG00000159314	1232	1453	1128	1881	1908	2387	ARHGAP27	Rho GTPase activating protein 27 [Source:HGNC Symbol;Acc:31813]	0.70524	0.000201143	0.00223225
ENSG00000113761	225	273	264	196	161	177	ZNF346	zinc finger protein 346 [Source:HGNC Symbol;Acc:16403]	-0.475578	0.0002013	0.00223269
ENSG00000089335	292	316	265	139	168	122	ZNF302	zinc finger protein 302 [Source:HGNC Symbol;Acc:13848]	-1.15141	0.000202259	0.00224201
ENSG00000113240	110	145	102	205	216	185	CLK4	CDC-like kinase 4 [Source:HGNC Symbol;Acc:13659]	0.757718	0.000202839	0.00224712
ENSG00000188868	21	19	23	4	5	0	ZNF563	zinc finger protein 563 [Source:HGNC Symbol;Acc:30498]	-2.96352	0.00020446	0.00226376
ENSG00000011523	149	148	128	116	82	85	CEP68	centrosomal protein 68kDa [Source:HGNC Symbol;Acc:29076]	-0.595406	0.000206905	0.00228949
ENSG00000165609	2769	2746	2738	2289	2434	2378	NUDT5	nudix (nucleoside diphosphate linked moiety X)-type motif 5 [Source:HGNC Symbol;Acc:8052]	-0.233595	0.000209798	0.0023188
ENSG00000173875	498	454	490	344	346	316	ZNF791	zinc finger protein 791 [Source:HGNC Symbol;Acc:26895]	-0.570292	0.000209681	0.0023188
ENSG00000030419	301	264	269	161	143	142	IKZF2	IKAROS family zinc finger 2 (Helios) [Source:HGNC Symbol;Acc:13177]	-0.903718	0.000209956	0.00231919
ENSG00000127081	291	296	331	166	137	138	ZNF484	zinc finger protein 484 [Source:HGNC Symbol;Acc:23385]	-1.07792	0.000210972	0.00232744
ENSG00000165661	794	757	790	944	964	998	QSOX2	quiescin Q6 sulfhydryl oxidase 2 [Source:HGNC Symbol;Acc:30249]	0.322317	0.000211072	0.00232744
ENSG00000261074	794	757	790	944	964	998	QSOX2	quiescin Q6 sulfhydryl oxidase 2 [Source:HGNC Symbol;Acc:30249]	0.322317	0.000211072	0.00232744
ENSG00000081923	2343	2255	2254	1970	2034	1866	ATP8B1	ATPase, aminophospholipid transporter, class I, type 8B, member 1 [Source:HGNC Symbol;Acc:3706]	-0.266363	0.000212765	0.00234475
ENSG00000159915	37	32	32	11	11	12	ZNF233	zinc finger protein 233 [Source:HGNC Symbol;Acc:30946]	-1.65271	0.000214975	0.00236772
ENSG00000121858	209	202	225	125	150	139	TNFSF10	tumor necrosis factor (ligand) superfamily, member 10 [Source:HGNC Symbol;Acc:11925]	-0.678243	0.000216767	0.00238608
ENSG00000146826	185	223	224	312	277	319	C7orf43	chromosome 7 open reading frame 43 [Source:HGNC Symbol;Acc:25604]	0.533581	0.000217075	0.00238807
ENSG00000198824	114	134	100	65	69	84	CHAMP1	chromosome alignment maintaining phosphoprotein 1 [Source:HGNC Symbol;Acc:20311]	-0.689766	0.000218158	0.0023972
ENSG00000260117	114	134	100	65	69	84	CHAMP1	chromosome alignment maintaining phosphoprotein 1 [Source:HGNC Symbol;Acc:20311]	-0.689766	0.000218158	0.0023972
ENSG00000117153	1330	1283	1288	1000	1104	1090	KLHL12	kelch-like family member 12 [Source:HGNC Symbol;Acc:19360]	-0.317831	0.000218654	0.00240127
ENSG00000125871	940	949	941	744	745	735	MGME1	mitochondrial genome maintenance exonuclease 1 [Source:HGNC Symbol;Acc:16205]	-0.350933	0.000219501	0.00240851
ENSG00000129007	1392	1382	1344	1083	1117	1108	CALML4	calmodulin-like 4 [Source:HGNC Symbol;Acc:18445]	-0.303525	0.000219568	0.00240851
ENSG00000053524	35	31	27	71	40	66	MCF2L2	MCF.2 cell line derived transforming sequence-like 2 [Source:HGNC Symbol;Acc:30319]	0.970857	0.000219726	0.00240885
ENSG00000186567	13	7	11	23	22	30	CEACAM19	carcinoembryonic antigen-related cell adhesion molecule 19 [Source:HGNC Symbol;Acc:31951]	1.36469	0.000220771	0.00241891
ENSG00000153786	1507	1515	1489	1228	1302	1290	ZDHHC7	zinc finger, DHHC-type containing 7 [Source:HGNC Symbol;Acc:18459]	-0.248686	0.000221008	0.00242011
ENSG00000131979	581	558	646	1028	996	780	GCH1	GTP cyclohydrolase 1 [Source:HGNC Symbol;Acc:4193]	0.597848	0.000224435	0.00245621
ENSG00000099810	4923	4812	4874	6140	6079	5845	MTAP	methylthioadenosine phosphorylase [Source:HGNC Symbol;Acc:7413]	0.271717	0.000225285	0.00246408
ENSG00000077514	1477	1379	1283	1079	1053	1070	POLD3	polymerase (DNA-directed), delta 3, accessory subunit [Source:HGNC Symbol;Acc:20932]	-0.352663	0.000225735	0.00246759
ENSG00000103365	1302	1244	1251	1067	1013	1106	GGA2	golgi-associated, gamma adaptin ear containing, ARF binding protein 2 [Source:HGNC Symbol;Acc:16064]	-0.241205	0.000227422	0.00248459
ENSG00000078401	1153	1146	1254	1566	1564	1468	EDN1	endothelin 1 [Source:HGNC Symbol;Acc:3176]	0.370308	0.000228344	0.00249323
ENSG00000108306	366	365	373	278	281	276	FBXL20	F-box and leucine-rich repeat protein 20 [Source:HGNC Symbol;Acc:24679]	-0.413447	0.000230024	0.00251013
ENSG00000168917	57	42	64	107	100	98	SLC35G2	solute carrier family 35, member G2 [Source:HGNC Symbol;Acc:28480]	0.861667	0.000230484	0.00251369
ENSG00000065518	1934	1863	1767	1557	1614	1644	NDUFB4	NADH dehydrogenase (ubiquinone) 1 beta subcomplex, 4, 15kDa [Source:HGNC Symbol;Acc:7699]	-0.210713	0.000230785	0.00251552
ENSG00000155324	137	126	163	93	106	95	GRAMD3	GRAM domain containing 3 [Source:HGNC Symbol;Acc:24911]	-0.611151	0.000231308	0.00251846
ENSG00000184076	474	510	471	387	376	378	UQCR10	ubiquinol-cytochrome c reductase, complex III subunit X [Source:HGNC Symbol;Acc:30863]	-0.347348	0.00023132	0.00251846
ENSG00000157557	4684	4398	4349	5352	5017	5441	ETS2	v-ets avian erythroblastosis virus E26 oncogene homolog 2 [Source:HGNC Symbol;Acc:3489]	0.248704	0.000236051	0.0025685
ENSG00000005339	351	404	310	435	533	564	CREBBP	CREB binding protein [Source:HGNC Symbol;Acc:2348]	0.57751	0.000237477	0.00258253
ENSG00000182572	1532	1492	1477	824	976	1025	HIST1H3I	histone cluster 1, H3i [Source:HGNC Symbol;Acc:4771]	-0.618162	0.000238605	0.00259331
ENSG00000155893	243	217	226	153	143	187	ACPL2	acid phosphatase-like 2 [Source:HGNC Symbol;Acc:26303]	-0.510251	0.000238853	0.00259451
ENSG00000184898	29	21	40	7	5	18	RBM43	RNA binding motif protein 43 [Source:HGNC Symbol;Acc:24790]	-1.61204	0.000239846	0.00260381
ENSG00000108375	2588	2601	2502	1687	2056	2070	RNF43	ring finger protein 43 [Source:HGNC Symbol;Acc:18505]	-0.408137	0.00024058	0.00261028
ENSG00000130517	397	386	378	304	289	265	PGPEP1	pyroglutamyl-peptidase I [Source:HGNC Symbol;Acc:13568]	-0.432362	0.000242057	0.0026248
ENSG00000164815	836	788	857	560	607	539	ORC5	origin recognition complex, subunit 5 [Source:HGNC Symbol;Acc:8491]	-0.640715	0.000243217	0.00263587
ENSG00000124104	112	109	105	69	67	69	SNX21	sorting nexin family member 21 [Source:HGNC Symbol;Acc:16154]	-0.650558	0.000244234	0.00264538
ENSG00000144567	1698	1654	1899	1334	1404	1419	FAM134A	family with sequence similarity 134, member A [Source:HGNC Symbol;Acc:28450]	-0.327667	0.000244997	0.00265213
ENSG00000006025	157	176	155	103	95	121	OSBPL7	oxysterol binding protein-like 7 [Source:HGNC Symbol;Acc:16387]	-0.547328	0.00024653	0.0026672
ENSG00000234602	22	25	26	11	8	7	MCIDAS	multiciliate differentiation and DNA synthesis associated cell cycle protein [Source:HGNC Symbol;Acc:40050]	-1.48834	0.000246725	0.00266779
ENSG00000021355	2287	2281	2159	2962	2927	3080	SERPINB1	serpin peptidase inhibitor, clade B (ovalbumin), member 1 [Source:HGNC Symbol;Acc:3311]	0.415046	0.000248569	0.00268619
ENSG00000221949	26	28	26	55	43	60	C12orf61	chromosome 12 open reading frame 61 [Source:HGNC Symbol;Acc:26364]	1.10477	0.000252068	0.00272245
ENSG00000130675	132	96	79	57	41	48	MNX1	motor neuron and pancreas homeobox 1 [Source:HGNC Symbol;Acc:4979]	-1.06609	0.000252271	0.00272309
ENSG00000158109	1415	1461	1503	1217	1129	1244	TPRG1L	tumor protein p63 regulated 1-like [Source:HGNC Symbol;Acc:27007]	-0.287287	0.000252544	0.00272448
ENSG00000204650	314	308	288	225	274	213	CRHR1-IT1	CRHR1 intronic transcript 1 (non-protein coding) [Source:HGNC Symbol;Acc:26327]	-0.420599	0.000253188	0.00272988
ENSG00000164023	1680	1645	1753	2756	2733	2661	SGMS2	sphingomyelin synthase 2 [Source:HGNC Symbol;Acc:28395]	0.63037	0.000257495	0.00277474
ENSG00000111725	394	371	357	222	308	251	PRKAB1	protein kinase, AMP-activated, beta 1 non-catalytic subunit [Source:HGNC Symbol;Acc:9378]	-0.520997	0.000259169	0.00279118
ENSG00000125863	941	812	817	628	651	615	MKKS	McKusick-Kaufman syndrome [Source:HGNC Symbol;Acc:7108]	-0.440058	0.000259338	0.00279142
ENSG00000245293	7	3	1	30	19	20			2.61524	0.000263143	0.00283077
ENSG00000213995	946	948	1016	779	785	798	CARKD	carbohydrate kinase domain containing [Source:HGNC Symbol;Acc:25576]	-0.283855	0.000265566	0.00285521
ENSG00000149050	77	71	83	34	39	43	ZNF214	zinc finger protein 214 [Source:HGNC Symbol;Acc:13006]	-1.07063	0.000265745	0.00285552
ENSG00000196409	39	30	44	15	17	4	ZNF658	zinc finger protein 658 [Source:HGNC Symbol;Acc:25226]	-1.7726	0.000266009	0.00285673
ENSG00000163635	437	486	416	537	579	560	ATXN7	ataxin 7 [Source:HGNC Symbol;Acc:10560]	0.323664	0.000267531	0.00286982
ENSG00000221968	272	299	307	407	377	450	FADS3	fatty acid desaturase 3 [Source:HGNC Symbol;Acc:3576]	0.526237	0.000267497	0.00286982
ENSG00000138834	245	318	275	444	323	468	MAPK8IP3	mitogen-activated protein kinase 8 interacting protein 3 [Source:HGNC Symbol;Acc:6884]	0.620897	0.00026828	0.00287623
ENSG00000228393	7	10	4	31	17	25	LINC01004	long intergenic non-protein coding RNA 1004 [Source:HGNC Symbol;Acc:48961]	1.84463	0.000268484	0.00287678
ENSG00000224794	2	1	4	15	24	16			2.769	0.00026909	0.00288165
ENSG00000114902	1219	1240	1354	1022	1222	1075	SPCS1	signal peptidase complex subunit 1 homolog (S. cerevisiae) [Source:HGNC Symbol;Acc:23401]	-0.25991	0.000269437	0.00288273
ENSG00000156398	730	704	668	572	561	514	SFXN2	sideroflexin 2 [Source:HGNC Symbol;Acc:16086]	-0.324941	0.000269495	0.00288273
ENSG00000196743	434	444	397	353	320	350	GM2A	GM2 ganglioside activator [Source:HGNC Symbol;Acc:4367]	-0.310354	0.000269667	0.00288295
ENSG00000139344	15	17	26	50	47	34	AMDHD1	amidohydrolase domain containing 1 [Source:HGNC Symbol;Acc:28577]	1.30678	0.000270535	0.00289059
ENSG00000139675	647	533	559	414	405	387	HNRNPA1L2	heterogeneous nuclear ribonucleoprotein A1-like 2 [Source:HGNC Symbol;Acc:27067]	-0.47146	0.000271878	0.0029033
ENSG00000188243	1082	1048	1103	866	873	857	COMMD6	COMM domain containing 6 [Source:HGNC Symbol;Acc:24015]	-0.383375	0.000272727	0.00291073
ENSG00000062716	2721	2735	2698	4347	3935	4255	VMP1	vacuole membrane protein 1 [Source:HGNC Symbol;Acc:29559]	0.605135	0.000273231	0.00291446
ENSG00000118518	249	264	310	183	193	195	RNF146	ring finger protein 146 [Source:HGNC Symbol;Acc:21336]	-0.534801	0.0002739	0.00291996
ENSG00000074696	6016	5897	6057	4582	4722	4545	PTPLAD1	protein tyrosine phosphatase-like A domain containing 1 [Source:HGNC Symbol;Acc:24175]	-0.423394	0.000275478	0.00293513
ENSG00000128274	174	209	236	324	345	296	A4GALT	alpha 1,4-galactosyltransferase [Source:HGNC Symbol;Acc:18149]	0.696702	0.000276185	0.00294101
ENSG00000165244	641	676	709	508	514	434	ZNF367	zinc finger protein 367 [Source:HGNC Symbol;Acc:18320]	-0.53846	0.000279455	0.00297416
ENSG00000034533	172	159	116	80	93	87	ASTE1	asteroid homolog 1 (Drosophila) [Source:HGNC Symbol;Acc:25021]	-0.762243	0.000280472	0.0029833
ENSG00000230678	102	104	92	205	167	153	BRD2	bromodomain containing 2 [Source:HGNC Symbol;Acc:1103]	0.853342	0.000282287	0.00300092
ENSG00000005812	1417	1361	1473	1031	1161	918	FBXL3	F-box and leucine-rich repeat protein 3 [Source:HGNC Symbol;Acc:13599]	-0.569896	0.000283607	0.00301076
ENSG00000110046	595	706	770	962	1034	1039	ATG2A	autophagy related 2A [Source:HGNC Symbol;Acc:29028]	0.578535	0.00028369	0.00301076
ENSG00000243766	90	78	89	49	35	41	HOTTIP	HOXA distal transcript antisense RNA [Source:HGNC Symbol;Acc:37461]	-0.902256	0.000283467	0.00301076
ENSG00000122481	134	144	155	96	91	86	RWDD3	RWD domain containing 3 [Source:HGNC Symbol;Acc:21393]	-0.72987	0.000286646	0.00304044
ENSG00000125827	1944	1779	1877	1525	1450	1439	TMX4	thioredoxin-related transmembrane protein 4 [Source:HGNC Symbol;Acc:25237]	-0.382498	0.000289164	0.00306543
ENSG00000152137	0	1	4	9	6	15	HSPB8	heat shock 22kDa protein 8 [Source:HGNC Symbol;Acc:30171]	2.60596	0.000289504	0.00306732
ENSG00000084234	11383	11093	11305	12615	13163	12947	APLP2	amyloid beta (A4) precursor-like protein 2 [Source:HGNC Symbol;Acc:598]	0.200964	0.000289914	0.00306994
ENSG00000162775	1223	1215	1098	1391	1328	1382	RBM15	RNA binding motif protein 15 [Source:HGNC Symbol;Acc:14959]	0.238957	0.000290075	0.00306994
ENSG00000065054	571	797	739	1032	1162	1180	SLC9A3R2	solute carrier family 9, subfamily A (NHE3, cation proton antiporter 3), member 3 regulator 2 [Source:HGNC Symbol;Acc:11076]	0.693556	0.00029042	0.00307186
ENSG00000132383	2125	2054	2009	1653	1716	1737	RPA1	replication protein A1, 70kDa [Source:HGNC Symbol;Acc:10289]	-0.285484	0.000292164	0.00308515
ENSG00000169641	1553	1499	1497	1819	1844	1760	LUZP1	leucine zipper protein 1 [Source:HGNC Symbol;Acc:14985]	0.251488	0.000291973	0.00308515
ENSG00000177383	605	632	620	445	393	379	MAGEF1	melanoma antigen family F, 1 [Source:HGNC Symbol;Acc:29639]	-0.585733	0.000292147	0.00308515
ENSG00000165494	1602	1557	1581	2249	2109	2035	PCF11	PCF11 cleavage and polyadenylation factor subunit [Source:HGNC Symbol;Acc:30097]	0.420202	0.00029326	0.00309499
ENSG00000119638	639	612	616	492	549	522	NEK9	NIMA-related kinase 9 [Source:HGNC Symbol;Acc:18591]	-0.273841	0.000293685	0.00309775
ENSG00000141551	810	820	815	1012	1045	1085	CSNK1D	casein kinase 1, delta [Source:HGNC Symbol;Acc:2452]	0.374685	0.00029774	0.00313878
ENSG00000204237	159	203	214	109	127	115	OXLD1	oxidoreductase-like domain containing 1 [Source:HGNC Symbol;Acc:27901]	-0.716246	0.000298679	0.00314693
ENSG00000101190	751	748	747	589	662	571	TCFL5	transcription factor-like 5 (basic helix-loop-helix) [Source:HGNC Symbol;Acc:11646]	-0.362851	0.000299511	0.00315394
ENSG00000169612	785	792	815	706	685	647	FAM103A1	family with sequence similarity 103, member A1 [Source:HGNC Symbol;Acc:31022]	-0.279761	0.00029968	0.00315397
ENSG00000136720	336	383	438	532	508	566	HS6ST1	heparan sulfate 6-O-sulfotransferase 1 [Source:HGNC Symbol;Acc:5201]	0.494581	0.000300092	0.0031548
ENSG00000256594	43	42	59	21	25	26			-1.08657	0.000300056	0.0031548
ENSG00000152443	966	961	908	636	628	623	ZNF776	zinc finger protein 776 [Source:HGNC Symbol;Acc:26765]	-0.609783	0.000301614	0.00316904
ENSG00000118777	1367	1296	1397	1130	1198	1098	ABCG2	ATP-binding cassette, sub-family G (WHITE), member 2 [Source:HGNC Symbol;Acc:74]	-0.289105	0.000302245	0.00317391
ENSG00000125850	97	99	89	44	48	61	OVOL2	ovo-like zinc finger 2 [Source:HGNC Symbol;Acc:15804]	-0.81205	0.00030404	0.00319099
ENSG00000132763	167	167	188	106	121	131	MMACHC	methylmalonic aciduria (cobalamin deficiency) cblC type, with homocystinuria [Source:HGNC Symbol;Acc:24525]	-0.498719	0.000304605	0.00319515
ENSG00000196459	471	413	447	345	304	339	TRAPPC2	trafficking protein particle complex 2 [Source:HGNC Symbol;Acc:23068]	-0.440792	0.000306817	0.00321657
ENSG00000116906	2499	2233	2396	1835	1811	1786	GNPAT	glyceronephosphate O-acyltransferase [Source:HGNC Symbol;Acc:4416]	-0.420606	0.000307587	0.00322286
ENSG00000095002	1244	1249	1618	780	693	592	MSH2	mutS homolog 2 [Source:HGNC Symbol;Acc:7325]	-1.07494	0.000308256	0.00322591
ENSG00000096717	690	685	659	1253	1237	1089	SIRT1	sirtuin 1 [Source:HGNC Symbol;Acc:14929]	0.77252	0.000308481	0.00322591
ENSG00000114841	48	48	42	76	94	70	DNAH1	dynein, axonemal, heavy chain 1 [Source:HGNC Symbol;Acc:2940]	0.81387	0.00030819	0.00322591
ENSG00000161800	3414	3148	3122	2660	2877	2828	RACGAP1	Rac GTPase activating protein 1 [Source:HGNC Symbol;Acc:9804]	-0.226482	0.000308559	0.00322591
ENSG00000113812	477	469	459	367	387	330	ACTR8	ARP8 actin-related protein 8 homolog (yeast) [Source:HGNC Symbol;Acc:14672]	-0.376231	0.000310562	0.00324505
ENSG00000173821	3050	3181	2872	4105	3370	3489	RNF213	ring finger protein 213 [Source:HGNC Symbol;Acc:14539]	0.292302	0.000311521	0.00325328
ENSG00000261408	38	25	60	83	76	92	TEN1-CDK3	TEN1-CDK3 readthrough (NMD candidate) [Source:HGNC Symbol;Acc:44420]	1.05283	0.000312413	0.0032608
ENSG00000170584	485	451	484	346	394	330	NUDCD2	NudC domain containing 2 [Source:HGNC Symbol;Acc:30535]	-0.498289	0.000313149	0.00326668
ENSG00000119392	1322	1309	1267	1097	1164	1127	GLE1	GLE1 RNA export mediator [Source:HGNC Symbol;Acc:4315]	-0.211435	0.000315633	0.00329078
ENSG00000196850	422	423	461	695	681	660	PPTC7	PTC7 protein phosphatase homolog (S. cerevisiae) [Source:HGNC Symbol;Acc:30695]	0.587665	0.000317575	0.00330921
ENSG00000115649	814	830	873	577	575	608	CNPPD1	cyclin Pas1/PHO80 domain containing 1 [Source:HGNC Symbol;Acc:25220]	-0.474405	0.00031963	0.00332879
ENSG00000169246	61	18	19	107	95	90	NPIPB3	nuclear pore complex interacting protein family, member B3 [Source:HGNC Symbol;Acc:28989]	1.61379	0.000322162	0.00335332
ENSG00000272030	22	24	26	50	30	53			1.00434	0.00032365	0.00336696
ENSG00000088682	1012	913	960	655	743	791	COQ9	coenzyme Q9 [Source:HGNC Symbol;Acc:25302]	-0.389669	0.000326204	0.00339166
ENSG00000055950	932	907	987	673	762	799	MRPL43	mitochondrial ribosomal protein L43 [Source:HGNC Symbol;Acc:14517]	-0.316046	0.000328594	0.00341464
ENSG00000168062	19	18	23	4	3	12	BATF2	basic leucine zipper transcription factor, ATF-like 2 [Source:HGNC Symbol;Acc:25163]	-1.64878	0.000329712	0.00342438
ENSG00000120519	192	176	145	105	111	103	SLC10A7	solute carrier family 10, member 7 [Source:HGNC Symbol;Acc:23088]	-0.773958	0.000330107	0.0034266
ENSG00000016864	549	515	487	350	382	371	GLT8D1	glycosyltransferase 8 domain containing 1 [Source:HGNC Symbol;Acc:24870]	-0.504451	0.000331728	0.00343966
ENSG00000183723	1277	1364	1318	1169	1206	1110	CMTM4	CKLF-like MARVEL transmembrane domain containing 4 [Source:HGNC Symbol;Acc:19175]	-0.215754	0.000331627	0.00343966
ENSG00000178761	876	861	844	750	708	740	FAM219B	family with sequence similarity 219, member B [Source:HGNC Symbol;Acc:24695]	-0.227775	0.000332997	0.00345092
ENSG00000177732	59	68	72	38	35	31	SOX12	SRY (sex determining region Y)-box 12 [Source:HGNC Symbol;Acc:11198]	-0.864698	0.000333958	0.003459
ENSG00000168061	295	333	363	168	202	227	SAC3D1	SAC3 domain containing 1 [Source:HGNC Symbol;Acc:30179]	-0.717124	0.000336595	0.0034844
ENSG00000176697	12	25	19	5	7	9	BDNF	brain-derived neurotrophic factor [Source:HGNC Symbol;Acc:1033]	-1.40473	0.000338261	0.00349973
ENSG00000232220	66	56	42	137	178	169			1.65544	0.000339704	0.00351275
ENSG00000166295	1578	1506	1669	1297	1396	1366	ANAPC16	anaphase promoting complex subunit 16 [Source:HGNC Symbol;Acc:26976]	-0.273181	0.000341839	0.0035329
ENSG00000120832	119	106	100	62	61	72	MTERFD3	MTERF domain containing 3 [Source:HGNC Symbol;Acc:30779]	-0.75189	0.000345952	0.00357346
ENSG00000049283	47	88	50	21	16	33	EPN3	epsin 3 [Source:HGNC Symbol;Acc:18235]	-1.31158	0.000346738	0.00357767
ENSG00000169609	451	438	411	333	355	336	C15orf40	chromosome 15 open reading frame 40 [Source:HGNC Symbol;Acc:28443]	-0.3467	0.00034655	0.00357767
ENSG00000039068	5274	4951	4841	6550	6107	6099	CDH1	cadherin 1, type 1, E-cadherin (epithelial) [Source:HGNC Symbol;Acc:1748]	0.278406	0.000347752	0.00358618
ENSG00000176422	485	385	454	316	335	313	SPRYD4	SPRY domain containing 4 [Source:HGNC Symbol;Acc:27468]	-0.460689	0.000350372	0.00361123
ENSG00000177820	0	0	0	0	2	24			6.04599	0.000351294	0.00361877
ENSG00000135966	1095	1033	1030	871	905	867	TGFBRAP1	transforming growth factor, beta receptor associated protein 1 [Source:HGNC Symbol;Acc:16836]	-0.252134	0.000351674	0.00362071
ENSG00000090020	83	83	86	113	135	114	SLC9A1	solute carrier family 9, subfamily A (NHE1, cation proton antiporter 1), member 1 [Source:HGNC Symbol;Acc:11071]	0.529716	0.000353561	0.00363817
ENSG00000130477	8	8	0	17	12	17	UNC13A	unc-13 homolog A (C. elegans) [Source:HGNC Symbol;Acc:23150]	1.56142	0.000354237	0.00364315
ENSG00000113161	4365	4149	4307	6762	6785	6375	HMGCR	3-hydroxy-3-methylglutaryl-CoA reductase [Source:HGNC Symbol;Acc:5006]	0.599748	0.000356264	0.00366199
ENSG00000100211	213	190	199	137	157	146	CBY1	chibby homolog 1 (Drosophila) [Source:HGNC Symbol;Acc:1307]	-0.453762	0.00035697	0.00366727
ENSG00000169155	402	413	423	547	554	497	ZBTB43	zinc finger and BTB domain containing 43 [Source:HGNC Symbol;Acc:17908]	0.35337	0.000360804	0.00370465
ENSG00000231360	74	91	87	127	145	150		Protein LOC642441 [Source:UniProtKB/TrEMBL;Acc:F5H305]	0.768093	0.000361236	0.00370708
ENSG00000261505	45	50	52	109	75	98			0.905443	0.000361824	0.0037111
ENSG00000127616	1328	1453	1519	1774	1871	1865	SMARCA4	SWI/SNF related, matrix associated, actin dependent regulator of chromatin, subfamily a, member 4 [Source:HGNC Symbol;Acc:11100]	0.405539	0.000362351	0.00371449
ENSG00000152234	10037	9618	9701	8406	8817	8607	ATP5A1	ATP synthase, H+ transporting, mitochondrial F1 complex, alpha subunit 1, cardiac muscle [Source:HGNC Symbol;Acc:823]	-0.200877	0.000363195	0.00371911
ENSG00000185900	295	289	275	216	202	210	POMK	protein-O-mannose kinase [Source:HGNC Symbol;Acc:26267]	-0.432316	0.000363124	0.00371911
ENSG00000145431	732	815	814	545	600	539	PDGFC	platelet derived growth factor C [Source:HGNC Symbol;Acc:8801]	-0.541994	0.000363429	0.0037195
ENSG00000137947	897	786	854	1023	1078	1134	GTF2B	general transcription factor IIB [Source:HGNC Symbol;Acc:4648]	0.345105	0.000369308	0.00377763
ENSG00000169562	374	365	347	246	252	259	GJB1	gap junction protein, beta 1, 32kDa [Source:HGNC Symbol;Acc:4283]	-0.522252	0.000369998	0.00378265
ENSG00000105835	4723	4705	4591	8962	8884	8448	NAMPT	nicotinamide phosphoribosyltransferase [Source:HGNC Symbol;Acc:30092]	0.849393	0.000370375	0.00378446
ENSG00000198855	163	159	171	125	99	110	FICD	FIC domain containing [Source:HGNC Symbol;Acc:18416]	-0.521634	0.000372226	0.00380132
ENSG00000261974	743	771	1016	581	676	555	CWC15	CWC15 spliceosome-associated protein homolog (S. cerevisiae) [Source:HGNC Symbol;Acc:26939]	-0.546733	0.000373502	0.00381229
ENSG00000242259	663	589	555	440	377	468	C22orf39	chromosome 22 open reading frame 39 [Source:HGNC Symbol;Acc:27012]	-0.52137	0.000375141	0.00382697
ENSG00000167637	265	307	320	171	220	187	ZNF283	zinc finger protein 283 [Source:HGNC Symbol;Acc:13077]	-0.688991	0.000375534	0.00382891
ENSG00000188643	3415	3485	3541	4137	4436	4658	S100A16	S100 calcium binding protein A16 [Source:HGNC Symbol;Acc:20441]	0.366444	0.00037667	0.00383843
ENSG00000114861	341	323	377	251	239	237	FOXP1	forkhead box P1 [Source:HGNC Symbol;Acc:3823]	-0.509086	0.000376953	0.00383924
ENSG00000073792	752	713	656	884	782	864	IGF2BP2	insulin-like growth factor 2 mRNA binding protein 2 [Source:HGNC Symbol;Acc:28867]	0.274863	0.000377183	0.00383953
ENSG00000016402	167	169	173	129	101	93	IL20RA	interleukin 20 receptor, alpha [Source:HGNC Symbol;Acc:6003]	-0.633792	0.000379321	0.00385922
ENSG00000259943	75	71	102	46	36	41			-0.980192	0.000379898	0.00386301
ENSG00000066697	398	374	368	534	444	565	MSANTD3	Myb/SANT-like DNA-binding domain containing 3 [Source:HGNC Symbol;Acc:23370]	0.480563	0.000382284	0.00388518
ENSG00000189114	228	201	208	151	140	128	BLOC1S3	biogenesis of lysosomal organelles complex-1, subunit 3 [Source:HGNC Symbol;Acc:20914]	-0.583349	0.00038378	0.0038983
ENSG00000173264	102	114	92	165	158	182	GPR137	G protein-coupled receptor 137 [Source:HGNC Symbol;Acc:24300]	0.740638	0.000386026	0.00391901
ENSG00000196730	1274	1322	1323	1075	1135	1118	DAPK1	death-associated protein kinase 1 [Source:HGNC Symbol;Acc:2674]	-0.230209	0.000387804	0.00393496
ENSG00000263044	182	189	166	109	136	109	NSUN5P1	NOP2/Sun domain family, member 5 pseudogene 1 [Source:HGNC Symbol;Acc:19146]	-0.648196	0.000389882	0.00395392
ENSG00000183309	409	302	257	192	247	163	ZNF623	zinc finger protein 623 [Source:HGNC Symbol;Acc:29084]	-0.688676	0.000393413	0.0039876
ENSG00000151502	1241	1117	1218	912	937	969	VPS26B	vacuolar protein sorting 26 homolog B (S. pombe) [Source:HGNC Symbol;Acc:28119]	-0.327552	0.000393891	0.0039903
ENSG00000188428	370	362	368	251	232	248	BLOC1S5	biogenesis of lysosomal organelles complex-1, subunit 5, muted [Source:HGNC Symbol;Acc:18561]	-0.622038	0.000397965	0.00402942
ENSG00000226742	291	266	248	191	205	198	HSBP1L1	heat shock factor binding protein 1-like 1 [Source:HGNC Symbol;Acc:37243]	-0.436451	0.000400653	0.00405447
ENSG00000135503	478	424	438	311	350	320	ACVR1B	activin A receptor, type IB [Source:HGNC Symbol;Acc:172]	-0.477078	0.000402183	0.00406778
ENSG00000248405	12	11	11	35	37	48	PRR5-ARHGAP8	PRR5-ARHGAP8 readthrough [Source:HGNC Symbol;Acc:34512]	1.82775	0.000403203	0.00407593
ENSG00000099889	619	809	784	1068	1067	1085	ARVCF	armadillo repeat gene deleted in velocardiofacial syndrome [Source:HGNC Symbol;Acc:728]	0.582912	0.000405308	0.00409283
ENSG00000108861	1486	1532	1434	1690	1723	1768	DUSP3	dual specificity phosphatase 3 [Source:HGNC Symbol;Acc:3069]	0.201707	0.000405121	0.00409283
ENSG00000104067	4823	4700	4600	6160	5934	6172	TJP1	tight junction protein 1 [Source:HGNC Symbol;Acc:11827]	0.360994	0.000406976	0.00410594
ENSG00000163975	142	139	115	189	180	212	MFI2	antigen p97 (melanoma associated) identified by monoclonal antibodies 133.2 and 96.5 [Source:HGNC Symbol;Acc:7037]	0.614498	0.000407039	0.00410594
ENSG00000186188	1027	1070	1040	1288	1307	1315	FFAR4	free fatty acid receptor 4 [Source:HGNC Symbol;Acc:19061]	0.299967	0.000409608	0.00412965
ENSG00000184602	304	272	314	215	208	247	SNN	stannin [Source:HGNC Symbol;Acc:11149]	-0.386637	0.000411801	0.00414955
ENSG00000131759	272	309	297	421	401	422	RARA	retinoic acid receptor, alpha [Source:HGNC Symbol;Acc:9864]	0.525153	0.000412105	0.00415041
ENSG00000256894	23	31	32	56	68	71			1.36615	0.000414177	0.00416905
ENSG00000110315	1854	1983	2181	1519	1648	1359	RNF141	ring finger protein 141 [Source:HGNC Symbol;Acc:21159]	-0.478937	0.000414721	0.00417231
ENSG00000017797	4159	4171	3999	3617	3766	3702	RALBP1	ralA binding protein 1 [Source:HGNC Symbol;Acc:9841]	-0.165571	0.000416016	0.00418257
ENSG00000141219	535	539	556	345	398	400	C17orf80	chromosome 17 open reading frame 80 [Source:HGNC Symbol;Acc:29601]	-0.52179	0.000416181	0.00418257
ENSG00000182224	274	295	298	362	376	381	CYB5D1	cytochrome b5 domain containing 1 [Source:HGNC Symbol;Acc:26516]	0.374998	0.000418728	0.00420593
ENSG00000169955	103	126	125	78	64	78	ZNF747	zinc finger protein 747 [Source:HGNC Symbol;Acc:28350]	-0.678507	0.000420522	0.00422171
ENSG00000120162	67	67	67	43	27	31	MOB3B	MOB kinase activator 3B [Source:HGNC Symbol;Acc:23825]	-0.943684	0.000424619	0.00426059
ENSG00000089692	0	0	0	5	5	5	LAG3	lymphocyte-activation gene 3 [Source:HGNC Symbol;Acc:6476]	4.67919	0.00042497	0.00426185
ENSG00000230373	0	0	0	6	0	6	GOLGA6L5P	golgin A6 family-like 5, pseudogene [Source:HGNC Symbol;Acc:30472]	4.64528	0.000426167	0.00427159
ENSG00000183978	614	610	679	474	486	498	COA3	cytochrome c oxidase assembly factor 3 [Source:HGNC Symbol;Acc:24990]	-0.368878	0.000429111	0.00429883
ENSG00000107819	983	986	931	765	763	756	SFXN3	sideroflexin 3 [Source:HGNC Symbol;Acc:16087]	-0.314798	0.000430347	0.00430893
ENSG00000071054	1262	1204	1152	1427	1441	1551	MAP4K4	mitogen-activated protein kinase kinase kinase kinase 4 [Source:HGNC Symbol;Acc:6866]	0.297445	0.000430931	0.00431249
ENSG00000214046	1049	972	967	780	776	824	SMIM7	small integral membrane protein 7 [Source:HGNC Symbol;Acc:28419]	-0.312738	0.000431306	0.00431398
ENSG00000119431	340	388	351	240	283	276	HDHD3	haloacid dehalogenase-like hydrolase domain containing 3 [Source:HGNC Symbol;Acc:28171]	-0.460042	0.000431876	0.00431739
ENSG00000223766	0	1	0	15	19	0	PRR3	proline rich 3 [Source:HGNC Symbol;Acc:21149]	4.6633	0.000432417	0.00431824
ENSG00000233564	0	1	0	15	19	0	PRR3	proline rich 3 [Source:HGNC Symbol;Acc:21149]	4.6633	0.000432417	0.00431824
ENSG00000106537	1148	1152	1460	938	1043	926	TSPAN13	tetraspanin 13 [Source:HGNC Symbol;Acc:21643]	-0.434851	0.000436149	0.00435321
ENSG00000198944	43	42	43	13	22	11	SOWAHA	sosondowah ankyrin repeat domain family member A [Source:HGNC Symbol;Acc:27033]	-1.42154	0.000436908	0.00435849
ENSG00000013503	694	614	616	465	461	440	POLR3B	polymerase (RNA) III (DNA directed) polypeptide B [Source:HGNC Symbol;Acc:30348]	-0.536295	0.000437694	0.00436333
ENSG00000118804	68	76	77	29	39	44	FAM47E-STBD1	FAM47E-STBD1 readthrough [Source:HGNC Symbol;Acc:44667]	-1.06902	0.000437853	0.00436333
ENSG00000057757	1833	1772	1814	1564	1634	1646	PITHD1	PITH (C-terminal proteasome-interacting domain of thioredoxin-like) domain containing 1 [Source:HGNC Symbol;Acc:25022]	-0.173936	0.000439017	0.00437263
ENSG00000196757	276	228	281	151	136	144	ZNF700	zinc finger protein 700 [Source:HGNC Symbol;Acc:25292]	-0.895236	0.000444293	0.00442285
ENSG00000229091	31	23	24	43	53	59	HSPA8P8	heat shock 70kDa protein 8 pseudogene 8 [Source:HGNC Symbol;Acc:44923]	1.13029	0.000444796	0.00442553
ENSG00000125352	313	273	272	187	167	209	RNF113A	ring finger protein 113A [Source:HGNC Symbol;Acc:12974]	-0.558302	0.000445245	0.00442767
ENSG00000161647	68	61	73	108	89	111	MPP3	membrane protein, palmitoylated 3 (MAGUK p55 subfamily member 3) [Source:HGNC Symbol;Acc:7221]	0.667535	0.000446963	0.00444067
ENSG00000188343	37	39	60	23	27	17	FAM92A1	family with sequence similarity 92, member A1 [Source:HGNC Symbol;Acc:30452]	-1.17136	0.00044702	0.00444067
ENSG00000106789	1423	1462	1409	1143	1195	1116	CORO2A	coronin, actin binding protein, 2A [Source:HGNC Symbol;Acc:2255]	-0.310705	0.000450953	0.00447585
ENSG00000240338	2	4	1	15	8	16			2.57175	0.000451035	0.00447585
ENSG00000163964	628	668	632	518	531	475	PIGX	phosphatidylinositol glycan anchor biosynthesis, class X [Source:HGNC Symbol;Acc:26046]	-0.388183	0.000452126	0.00448433
ENSG00000133884	809	740	761	536	607	632	DPF2	D4, zinc and double PHD fingers family 2 [Source:HGNC Symbol;Acc:9964]	-0.360507	0.000454158	0.00450213
ENSG00000124116	3	2	1	14	7	13	WFDC3	WAP four-disulfide core domain 3 [Source:HGNC Symbol;Acc:15957]	2.46879	0.000456406	0.00452205
ENSG00000006704	333	354	334	450	454	478	GTF2IRD1	GTF2I repeat domain containing 1 [Source:HGNC Symbol;Acc:4661]	0.47622	0.000457039	0.00452359
ENSG00000261920	333	354	334	450	454	478	GTF2IRD1	GTF2I repeat domain containing 1 [Source:HGNC Symbol;Acc:4661]	0.47622	0.000457039	0.00452359
ENSG00000152433	43	21	34	12	6	13	ZNF547	zinc finger protein 547 [Source:HGNC Symbol;Acc:26432]	-1.56415	0.000457742	0.00452818
ENSG00000121486	267	277	324	184	208	184	TRMT1L	tRNA methyltransferase 1 homolog (S. cerevisiae)-like [Source:HGNC Symbol;Acc:16782]	-0.6718	0.000458524	0.00453355
ENSG00000005882	268	274	327	189	205	217	PDK2	pyruvate dehydrogenase kinase, isozyme 2 [Source:HGNC Symbol;Acc:8810]	-0.498885	0.000459067	0.00453655
ENSG00000083842	220	241	238	157	157	172		Zinc finger protein 8 [Source:UniProtKB/Swiss-Prot;Acc:P17098]	-0.507593	0.000460889	0.00454981
ENSG00000169607	582	553	499	313	354	361	CKAP2L	cytoskeleton associated protein 2-like [Source:HGNC Symbol;Acc:26877]	-0.705316	0.000460803	0.00454981
ENSG00000134884	1081	1076	1063	1585	1419	1474	ARGLU1	arginine and glutamate rich 1 [Source:HGNC Symbol;Acc:25482]	0.465102	0.000461339	0.00455188
ENSG00000121022	2342	2239	2379	2058	2101	1934	COPS5	COP9 signalosome subunit 5 [Source:HGNC Symbol;Acc:2240]	-0.229325	0.000469893	0.00463386
ENSG00000164828	2569	2650	2691	3170	3085	3193	SUN1	Sad1 and UNC84 domain containing 1 [Source:HGNC Symbol;Acc:18587]	0.257536	0.000470842	0.00464081
ENSG00000167747	3656	4006	3873	4627	4973	5012	C19orf48	chromosome 19 open reading frame 48 [Source:HGNC Symbol;Acc:29667]	0.369336	0.000471203	0.00464195
ENSG00000198185	192	184	169	112	112	126	ZNF334	zinc finger protein 334 [Source:HGNC Symbol;Acc:15806]	-0.661037	0.000471498	0.00464244
ENSG00000173566	50	53	53	25	24	31	NUDT18	nudix (nucleoside diphosphate linked moiety X)-type motif 18 [Source:HGNC Symbol;Acc:26194]	-0.903807	0.000474037	0.00466502
ENSG00000272617	344	282	285	194	236	208		Conserved oligomeric Golgi complex subunit 8 [Source:UniProtKB/TrEMBL;Acc:H3BUN2]	-0.496966	0.000476485	0.00468667
ENSG00000197857	65	83	72	9	40	6	ZNF44	zinc finger protein 44 [Source:HGNC Symbol;Acc:13110]	-2.21705	0.000480823	0.00472689
ENSG00000204616	4	7	3	21	25	25	TRIM31	tripartite motif containing 31 [Source:HGNC Symbol;Acc:16289]	2.24899	0.000481902	0.00473504
ENSG00000196544	66	60	76	26	40	38	C17orf59	chromosome 17 open reading frame 59 [Source:HGNC Symbol;Acc:25939]	-0.959323	0.000483389	0.00474718
ENSG00000107862	1376	1329	1314	1614	1533	1520	GBF1	golgi brefeldin A resistant guanine nucleotide exchange factor 1 [Source:HGNC Symbol;Acc:4181]	0.242567	0.000484413	0.00475478
ENSG00000139044	890	1015	880	1086	1193	1168	B4GALNT3	beta-1,4-N-acetyl-galactosaminyl transferase 3 [Source:HGNC Symbol;Acc:24137]	0.337221	0.000486035	0.00476823
ENSG00000170473	549	581	567	324	431	446	WIBG	within bgcn homolog (Drosophila) [Source:HGNC Symbol;Acc:30258]	-0.479034	0.000493769	0.00484159
ENSG00000113552	1432	1282	1245	1038	1151	1096	GNPDA1	glucosamine-6-phosphate deaminase 1 [Source:HGNC Symbol;Acc:4417]	-0.273976	0.000494278	0.00484408
ENSG00000072134	368	380	367	474	536	500	EPN2	epsin 2 [Source:HGNC Symbol;Acc:18639]	0.430865	0.00049644	0.00486275
ENSG00000186666	179	157	142	86	127	104	BCDIN3D	BCDIN3 domain containing [Source:HGNC Symbol;Acc:27050]	-0.629825	0.0005013	0.00490782
ENSG00000169045	7521	7191	7328	9447	8982	9326	HNRNPH1	heterogeneous nuclear ribonucleoprotein H1 (H) [Source:HGNC Symbol;Acc:5041]	0.323321	0.000503217	0.00492096
ENSG00000184207	499	538	612	365	419	393	PGP	phosphoglycolate phosphatase [Source:HGNC Symbol;Acc:8909]	-0.517033	0.000503421	0.00492096
ENSG00000197713	1954	1916	2109	1692	1666	1558	RPE	ribulose-5-phosphate-3-epimerase [Source:HGNC Symbol;Acc:10293]	-0.336484	0.00050292	0.00492096
ENSG00000014641	2917	2817	2814	2414	2643	2512	MDH1	malate dehydrogenase 1, NAD (soluble) [Source:HGNC Symbol;Acc:6970]	-0.206668	0.00050617	0.00494452
ENSG00000152457	740	754	757	562	613	590	DCLRE1C	DNA cross-link repair 1C [Source:HGNC Symbol;Acc:17642]	-0.378501	0.000506353	0.00494452
ENSG00000122035	58	44	52	83	79	92	RASL11A	RAS-like, family 11, member A [Source:HGNC Symbol;Acc:23802]	0.719031	0.000508311	0.00496077
ENSG00000128581	457	391	406	316	325	313	RABL5	RAB, member RAS oncogene family-like 5 [Source:HGNC Symbol;Acc:21895]	-0.394141	0.000508542	0.00496077
ENSG00000107566	1291	1155	1062	930	933	930	ERLIN1	ER lipid raft associated 1 [Source:HGNC Symbol;Acc:16947]	-0.334687	0.000510259	0.00497496
ENSG00000129562	1548	1398	1625	1248	1379	1317	DAD1	defender against cell death 1 [Source:HGNC Symbol;Acc:2664]	-0.267065	0.000511075	0.00498035
ENSG00000171806	201	181	211	115	143	126	METTL18	methyltransferase like 18 [Source:HGNC Symbol;Acc:28793]	-0.753896	0.00051457	0.00500926
ENSG00000204576	0	1	0	15	19	0	PRR3	proline rich 3 [Source:HGNC Symbol;Acc:21149]	4.65891	0.000514555	0.00500926
ENSG00000162654	93	119	102	166	153	140	GBP4	guanylate binding protein 4 [Source:HGNC Symbol;Acc:20480]	0.544136	0.000515485	0.00501558
ENSG00000227300	0	0	0	6	3	5	KRT16P2	keratin 16 pseudogene 2 [Source:HGNC Symbol;Acc:37807]	4.9705	0.000515965	0.00501768
ENSG00000113595	334	317	324	227	261	204	TRIM23	tripartite motif containing 23 [Source:HGNC Symbol;Acc:660]	-0.557393	0.00051707	0.00502584
ENSG00000145022	509	482	523	387	381	409	TCTA	T-cell leukemia translocation altered [Source:HGNC Symbol;Acc:11692]	-0.359024	0.000518044	0.00503273
ENSG00000130193	470	558	520	299	357	358	THEM6	thioesterase superfamily member 6 [Source:HGNC Symbol;Acc:29656]	-0.569593	0.000520218	0.00504586
ENSG00000130479	184	266	255	366	460	411	MAP1S	microtubule-associated protein 1S [Source:HGNC Symbol;Acc:15715]	0.825768	0.00052046	0.00504586
ENSG00000136451	1830	1866	1897	1546	1467	1492	VEZF1	vascular endothelial zinc finger 1 [Source:HGNC Symbol;Acc:12949]	-0.330057	0.000519804	0.00504586
ENSG00000263194	470	558	520	299	357	358	THEM6	thioesterase superfamily member 6 [Source:HGNC Symbol;Acc:29656]	-0.569593	0.000520218	0.00504586
ENSG00000228477	0	0	0	5	5	7			4.84582	0.000521679	0.00505508
ENSG00000110104	508	588	557	693	695	705	CCDC86	coiled-coil domain containing 86 [Source:HGNC Symbol;Acc:28359]	0.376624	0.000523183	0.00506189
ENSG00000113790	260	244	254	165	155	158	EHHADH	enoyl-CoA, hydratase/3-hydroxyacyl CoA dehydrogenase [Source:HGNC Symbol;Acc:3247]	-0.696342	0.000522997	0.00506189
ENSG00000244165	52	58	54	85	119	92	P2RY11	purinergic receptor P2Y, G-protein coupled, 11 [Source:HGNC Symbol;Acc:8540]	0.90043	0.0005231	0.00506189
ENSG00000167657	97	181	148	265	327	306	DAPK3	death-associated protein kinase 3 [Source:HGNC Symbol;Acc:2676]	1.11812	0.000525482	0.00508154
ENSG00000104946	554	576	590	822	822	902	TBC1D17	TBC1 domain family, member 17 [Source:HGNC Symbol;Acc:25699]	0.592365	0.000526358	0.00508741
ENSG00000100422	439	438	408	326	355	339	CERK	ceramide kinase [Source:HGNC Symbol;Acc:19256]	-0.334607	0.000527511	0.00509596
ENSG00000006652	1024	1040	1050	1450	1483	1401	IFRD1	interferon-related developmental regulator 1 [Source:HGNC Symbol;Acc:5456]	0.455998	0.000528375	0.0051009
ENSG00000167447	768	740	812	558	646	648	SMG8	SMG8 nonsense mediated mRNA decay factor [Source:HGNC Symbol;Acc:25551]	-0.319629	0.000528561	0.0051009
ENSG00000156650	605	568	576	452	456	445	KAT6B	K(lysine) acetyltransferase 6B [Source:HGNC Symbol;Acc:17582]	-0.375419	0.000529536	0.0051077
ENSG00000009790	59	52	53	32	28	28	TRAF3IP3	TRAF3 interacting protein 3 [Source:HGNC Symbol;Acc:30766]	-0.86446	0.000532305	0.0051318
ENSG00000125848	123	136	171	81	109	70	FLRT3	fibronectin leucine rich transmembrane protein 3 [Source:HGNC Symbol;Acc:3762]	-0.920967	0.000534118	0.00514666
ENSG00000142102	761	870	814	1122	986	1105	ATHL1	ATH1, acid trehalase-like 1 (yeast) [Source:HGNC Symbol;Acc:26210]	0.446304	0.000539762	0.0051984
ENSG00000197451	6416	6299	6081	6961	7078	6987	HNRNPAB	heterogeneous nuclear ribonucleoprotein A/B [Source:HGNC Symbol;Acc:5034]	0.164754	0.00054561	0.00525205
ENSG00000197061	5649	5403	6066	3992	4650	4567	HIST1H4C	histone cluster 1, H4c [Source:HGNC Symbol;Acc:4787]	-0.387108	0.000548801	0.00528008
ENSG00000175536	34	47	70	18	22	18	LIPT2	lipoyl(octanoyl) transferase 2 (putative) [Source:HGNC Symbol;Acc:37216]	-1.42029	0.000549786	0.00528687
ENSG00000124529	3224	2987	3120	1988	2193	2250	HIST1H4B	histone cluster 1, H4b [Source:HGNC Symbol;Acc:4789]	-0.515877	0.00055183	0.00530384
ENSG00000237399	13	11	19	38	30	30	PITRM1-AS1	PITRM1 antisense RNA 1 [Source:HGNC Symbol;Acc:44675]	1.21915	0.00055432	0.00532507
ENSG00000136856	67	45	54	85	106	105	SLC2A8	solute carrier family 2 (facilitated glucose transporter), member 8 [Source:HGNC Symbol;Acc:13812]	0.839352	0.00055605	0.00533628
ENSG00000164764	1096	1086	1168	908	861	834	SBSPON	somatomedin B and thrombospondin, type 1 domain containing [Source:HGNC Symbol;Acc:30362]	-0.408486	0.000555904	0.00533628
ENSG00000101150	5065	5021	5012	5784	5956	5983	TPD52L2	tumor protein D52-like 2 [Source:HGNC Symbol;Acc:12007]	0.246776	0.000557834	0.0053492
ENSG00000173227	35	34	36	65	51	60	SYT12	synaptotagmin XII [Source:HGNC Symbol;Acc:18381]	0.786913	0.000557962	0.0053492
ENSG00000125503	941	1071	990	1327	1376	1409	PPP1R12C	protein phosphatase 1, regulatory subunit 12C [Source:HGNC Symbol;Acc:14947]	0.484927	0.000560025	0.00536627
ENSG00000223756	80	76	52	104	99	110	TSSC2	tumor suppressing subtransferable candidate 2 pseudogene [Source:HGNC Symbol;Acc:12384]	0.601807	0.000561497	0.00537766
ENSG00000163918	1162	1046	996	751	808	832	RFC4	replication factor C (activator 1) 4, 37kDa [Source:HGNC Symbol;Acc:9972]	-0.438848	0.000564691	0.00540551
ENSG00000124784	905	864	787	1197	1202	1210	RIOK1	RIO kinase 1 [Source:HGNC Symbol;Acc:18656]	0.476571	0.000570139	0.00545491
ENSG00000250462	295	290	257	232	220	213	LRRC37BP1	leucine rich repeat containing 37B pseudogene 1 [Source:HGNC Symbol;Acc:25390]	-0.381721	0.000571507	0.00546524
ENSG00000148154	1333	1313	1426	2660	2594	2243	UGCG	UDP-glucose ceramide glucosyltransferase [Source:HGNC Symbol;Acc:12524]	0.792602	0.000576817	0.00551323
ENSG00000100335	1008	991	1025	804	877	860	MIEF1	mitochondrial elongation factor 1 [Source:HGNC Symbol;Acc:25979]	-0.248447	0.000577779	0.00551964
ENSG00000132541	518	522	519	397	390	339	HRSP12	heat-responsive protein 12 [Source:HGNC Symbol;Acc:16897]	-0.565969	0.000583908	0.00557538
ENSG00000214944	1316	1270	1290	1500	1511	1486	ARHGEF28	Rho guanine nucleotide exchange factor (GEF) 28 [Source:HGNC Symbol;Acc:30322]	0.227438	0.000587079	0.00560284
ENSG00000132912	1776	1788	1844	1416	1511	1356	DCTN4	dynactin 4 (p62) [Source:HGNC Symbol;Acc:15518]	-0.390387	0.000588819	0.00561661
ENSG00000261230	37	44	43	146	52	63	CPSF1	cleavage and polyadenylation specific factor 1, 160kDa [Source:HGNC Symbol;Acc:2324]	1.23285	0.000589632	0.00562154
ENSG00000243479	80	74	92	36	45	49	MNX1-AS1	MNX1 antisense RNA 1 (head to head) [Source:HGNC Symbol;Acc:48954]	-0.85711	0.000591874	0.00564007
ENSG00000137992	353	400	423	296	260	217	DBT	dihydrolipoamide branched chain transacylase E2 [Source:HGNC Symbol;Acc:2698]	-0.575782	0.000593338	0.00565118
ENSG00000155868	291	285	334	196	193	191	MED7	mediator complex subunit 7 [Source:HGNC Symbol;Acc:2378]	-0.712529	0.000594237	0.0056569
ENSG00000177192	459	457	463	571	608	620	PUS1	pseudouridylate synthase 1 [Source:HGNC Symbol;Acc:15508]	0.414168	0.000599851	0.00570747
ENSG00000173848	3967	3636	3726	4516	4482	4316	NET1	neuroepithelial cell transforming 1 [Source:HGNC Symbol;Acc:14592]	0.226227	0.000600221	0.00570813
ENSG00000163125	464	473	426	324	314	338	RPRD2	regulation of nuclear pre-mRNA domain containing 2 [Source:HGNC Symbol;Acc:29039]	-0.454239	0.000601217	0.00571203
ENSG00000175575	351	296	307	246	259	249	PAAF1	proteasomal ATPase-associated factor 1 [Source:HGNC Symbol;Acc:25687]	-0.374758	0.000601234	0.00571203
ENSG00000140691	183	261	242	353	367	388	ARMC5	armadillo repeat containing 5 [Source:HGNC Symbol;Acc:25781]	0.719384	0.000602112	0.00571749
ENSG00000154473	5375	5255	5931	4490	4729	4163	BUB3	BUB3 mitotic checkpoint protein [Source:HGNC Symbol;Acc:1151]	-0.357158	0.000606504	0.00575632
ENSG00000238105	91	91	77	43	49	65	GOLGA2P5	golgin A2 pseudogene 5 [Source:HGNC Symbol;Acc:25315]	-0.679745	0.000612362	0.005809
ENSG00000189334	754	697	715	912	1019	1019	S100A14	S100 calcium binding protein A14 [Source:HGNC Symbol;Acc:18901]	0.466607	0.000614982	0.00583094
ENSG00000167962	583	741	715	1007	995	1084	ZNF598	zinc finger protein 598 [Source:HGNC Symbol;Acc:28079]	0.627573	0.000616705	0.00584435
[truncated: 39,274 more rows]

## Sheet: all necrop padj<0.05
genes	C1LP	C2LP	C3LP	N1LP	N2LP	N3LP	hgnc_symbol	description	N_log2FoldChange	N_pvalue	N_padj
ENSG00000175536	34	47	70	18	22	18	LIPT2	lipoyl(octanoyl) transferase 2 (putative) [Source:HGNC Symbol;Acc:37216]	-1.42029	0.000549786	0.00528687
ENSG00000135245	511	480	539	208	262	224	HILPDA	hypoxia inducible lipid droplet-associated [Source:HGNC Symbol;Acc:28859]	-1.13436	3.08e-15	1.31e-13
ENSG00000108786	52	54	83	22	27	37	HSD17B1	hydroxysteroid (17-beta) dehydrogenase 1 [Source:HGNC Symbol;Acc:5210]	-1.11182	6.11e-05	0.000769271
ENSG00000005469	174	153	150	86	107	64	CROT	carnitine O-octanoyltransferase [Source:HGNC Symbol;Acc:2366]	-1.03777	5.65e-05	0.000718318
ENSG00000143772	141	164	135	66	64	85	ITPKB	inositol-trisphosphate 3-kinase B [Source:HGNC Symbol;Acc:6179]	-1.03529	6.94e-10	1.91e-08
ENSG00000145675	1989	1975	1869	1089	1076	992	PIK3R1	phosphoinositide-3-kinase, regulatory subunit 1 (alpha) [Source:HGNC Symbol;Acc:8979]	-0.949223	1.5e-12	5.24e-11
ENSG00000119927	550	554	519	297	328	269	GPAM	glycerol-3-phosphate acyltransferase, mitochondrial [Source:HGNC Symbol;Acc:24865]	-0.906439	6.56e-09	1.63e-07
ENSG00000114698	91	100	96	53	61	54	PLSCR4	phospholipid scramblase 4 [Source:HGNC Symbol;Acc:16497]	-0.871687	5.76e-05	0.000730117
ENSG00000151093	254	264	264	151	163	145	OXSM	3-oxoacyl-ACP synthase, mitochondrial [Source:HGNC Symbol;Acc:26063]	-0.832622	2.97e-11	9.37e-10
ENSG00000134240	142	116	115	62	86	78	HMGCS2	3-hydroxy-3-methylglutaryl-CoA synthase 2 (mitochondrial) [Source:HGNC Symbol;Acc:5008]	-0.825793	0.00708758	0.0435791
ENSG00000125629	327	410	428	229	222	232	INSIG2	insulin induced gene 2 [Source:HGNC Symbol;Acc:20452]	-0.8241	0.00126146	0.0106493
ENSG00000155846	101	105	99	68	44	61	PPARGC1B	peroxisome proliferator-activated receptor gamma, coactivator 1 beta [Source:HGNC Symbol;Acc:30022]	-0.781275	2.16e-06	3.76e-05
ENSG00000103160	557	551	539	331	377	312	HSDL1	hydroxysteroid dehydrogenase like 1 [Source:HGNC Symbol;Acc:16475]	-0.761531	5.79e-14	2.22e-12
ENSG00000234964	571	337	500	286	325	249	FABP5P7	fatty acid binding protein 5 pseudogene 7 [Source:HGNC Symbol;Acc:31070]	-0.747984	0.000983801	0.0086283
ENSG00000103150	258	235	241	144	154	149	MLYCD	malonyl-CoA decarboxylase [Source:HGNC Symbol;Acc:7150]	-0.744672	2.93e-08	6.7e-07
ENSG00000075651	311	281	320	188	197	168	PLD1	phospholipase D1, phosphatidylcholine-specific [Source:HGNC Symbol;Acc:9067]	-0.738623	4.66e-06	7.64e-05
ENSG00000121897	220	191	206	134	131	120	LIAS	lipoic acid synthetase [Source:HGNC Symbol;Acc:16429]	-0.71128	1.31e-07	2.72e-06
ENSG00000124370	108	83	95	57	53	60	MCEE	methylmalonyl CoA epimerase [Source:HGNC Symbol;Acc:16732]	-0.706796	0.00288982	0.0210152
ENSG00000113790	260	244	254	165	155	158	EHHADH	enoyl-CoA, hydratase/3-hydroxyacyl CoA dehydrogenase [Source:HGNC Symbol;Acc:3247]	-0.696342	0.000522997	0.00506189
ENSG00000135845	666	690	691	410	448	475	PIGC	phosphatidylinositol glycan anchor biosynthesis, class C [Source:HGNC Symbol;Acc:8960]	-0.6792	1.05e-10	3.12e-09
ENSG00000133056	728	765	695	469	414	451	PIK3C2B	phosphatidylinositol-4-phosphate 3-kinase, catalytic subunit type 2 beta [Source:HGNC Symbol;Acc:8972]	-0.661943	2.4e-05	0.000336951
ENSG00000141179	496	513	557	327	363	339	PCTP	phosphatidylcholine transfer protein [Source:HGNC Symbol;Acc:8752]	-0.661087	4.1e-08	9.13e-07
ENSG00000204147	377	362	377	269	298	190	ASAH2B	N-acylsphingosine amidohydrolase (non-lysosomal ceramidase) 2B [Source:HGNC Symbol;Acc:23456]	-0.653789	0.00750703	0.045713
ENSG00000058866	66	60	75	37	51	37	DGKG	diacylglycerol kinase, gamma 90kDa [Source:HGNC Symbol;Acc:2853]	-0.653323	0.00400351	0.0275091
ENSG00000196917	1291	1279	1277	850	851	801	HCAR1	hydroxycarboxylic acid receptor 1 [Source:HGNC Symbol;Acc:4532]	-0.637726	1.61e-17	7.75e-16
ENSG00000196542	85	82	93	64	43	61	SPTSSB	serine palmitoyltransferase, small subunit B [Source:HGNC Symbol;Acc:24045]	-0.628579	0.00712213	0.0437206
ENSG00000104381	64	55	72	38	52	39	GDAP1	ganglioside induced differentiation associated protein 1 [Source:HGNC Symbol;Acc:15968]	-0.621802	0.00355484	0.0249063
ENSG00000161267	574	519	588	352	368	361	BDH1	3-hydroxybutyrate dehydrogenase, type 1 [Source:HGNC Symbol;Acc:1027]	-0.599087	1.01e-06	1.84e-05
ENSG00000137992	353	400	423	296	260	217	DBT	dihydrolipoamide branched chain transacylase E2 [Source:HGNC Symbol;Acc:2698]	-0.575782	0.000593338	0.00565118
ENSG00000130193	470	558	520	299	357	358	THEM6	thioesterase superfamily member 6 [Source:HGNC Symbol;Acc:29656]	-0.569593	0.000520218	0.00504586
ENSG00000263194	470	558	520	299	357	358	THEM6	thioesterase superfamily member 6 [Source:HGNC Symbol;Acc:29656]	-0.569593	0.000520218	0.00504586
ENSG00000124596	505	436	503	347	319	306	OARD1	O-acyl-ADP-ribose deacylase 1 [Source:HGNC Symbol;Acc:21257]	-0.560454	0.00344278	0.0242978
ENSG00000060642	517	476	494	317	354	346	PIGV	phosphatidylinositol glycan anchor biosynthesis, class V [Source:HGNC Symbol;Acc:26031]	-0.55884	3.53e-06	5.91e-05
ENSG00000178537	261	269	265	175	210	165	SLC25A20	solute carrier family 25 (carnitine/acylcarnitine translocase), member 20 [Source:HGNC Symbol;Acc:1421]	-0.55813	6.06e-06	9.81e-05
ENSG00000006025	157	176	155	103	95	121	OSBPL7	oxysterol binding protein-like 7 [Source:HGNC Symbol;Acc:16387]	-0.547328	0.00024653	0.0026672
ENSG00000257365	246	256	370	184	201	225	FNTB	farnesyltransferase, CAAX box, beta [Source:HGNC Symbol;Acc:3785]	-0.509254	0.00573	0.0366318
ENSG00000072415	858	799	833	643	608	542	MPP5	membrane protein, palmitoylated 5 (MAGUK p55 subfamily member 5) [Source:HGNC Symbol;Acc:18669]	-0.504011	0.00474798	0.0316265
ENSG00000107897	1142	1160	1122	838	785	832	ACBD5	acyl-CoA binding domain containing 5 [Source:HGNC Symbol;Acc:23338]	-0.489017	1.27e-05	0.000191249
ENSG00000157184	758	776	725	508	588	538	CPT2	carnitine palmitoyltransferase 2 [Source:HGNC Symbol;Acc:2330]	-0.474206	3e-07	5.95e-06
ENSG00000116005	1711	1685	1708	1283	1286	1210	PCYOX1	prenylcysteine oxidase 1 [Source:HGNC Symbol;Acc:20588]	-0.46734	0.00130206	0.0109384
ENSG00000086696	590	561	595	429	411	408	HSD17B2	hydroxysteroid (17-beta) dehydrogenase 2 [Source:HGNC Symbol;Acc:5211]	-0.44798	0.00166396	0.0134136
ENSG00000198189	918	880	974	712	746	682	HSD17B11	hydroxysteroid (17-beta) dehydrogenase 11 [Source:HGNC Symbol;Acc:22960]	-0.411934	0.00568724	0.0364106
ENSG00000072210	3288	3242	3237	2418	2643	2449	ALDH3A2	aldehyde dehydrogenase 3 family, member A2 [Source:HGNC Symbol;Acc:403]	-0.408326	2.7e-05	0.000375059
ENSG00000197894	3430	3066	3343	2491	2634	2441	ADH5	alcohol dehydrogenase 5 (class III), chi polypeptide [Source:HGNC Symbol;Acc:253]	-0.407629	2.72e-09	7.03e-08
ENSG00000137055	1578	1537	1460	1191	1194	1142	PLAA	phospholipase A2-activating protein [Source:HGNC Symbol;Acc:9043]	-0.399236	0.00166383	0.0134136
ENSG00000164951	521	490	540	435	435	357	PDP1	pyruvate dehyrogenase phosphatase catalytic subunit 1 [Source:HGNC Symbol;Acc:9279]	-0.39923	0.00083942	0.00756517
ENSG00000163964	628	668	632	518	531	475	PIGX	phosphatidylinositol glycan anchor biosynthesis, class X [Source:HGNC Symbol;Acc:26046]	-0.388183	0.000452126	0.00448433
ENSG00000184254	4734	4685	4899	3678	3671	3764	ALDH1A3	aldehyde dehydrogenase 1 family, member A3 [Source:HGNC Symbol;Acc:409]	-0.383787	8.05e-16	3.53e-14
ENSG00000152642	262	261	261	199	242	190	GPD1L	glycerol-3-phosphate dehydrogenase 1-like [Source:HGNC Symbol;Acc:28956]	-0.378983	0.00192799	0.015105
ENSG00000196139	1028	972	897	729	734	782	AKR1C3	aldo-keto reductase family 1, member C3 [Source:HGNC Symbol;Acc:386]	-0.36589	0.00252541	0.0189395
ENSG00000141720	2900	2698	2960	2227	2245	2239	PIP4K2B	phosphatidylinositol-5-phosphate 4-kinase, type II, beta [Source:HGNC Symbol;Acc:8998]	-0.34738	1.49e-07	3.07e-06
ENSG00000261300	792	856	880	707	760	638	PIGW	phosphatidylinositol glycan anchor biosynthesis, class W [Source:HGNC Symbol;Acc:23213]	-0.342013	0.00613841	0.0386589
ENSG00000107566	1291	1155	1062	930	933	930	ERLIN1	ER lipid raft associated 1 [Source:HGNC Symbol;Acc:16947]	-0.334687	0.000510259	0.00497496
ENSG00000100422	439	438	408	326	355	339	CERK	ceramide kinase [Source:HGNC Symbol;Acc:19256]	-0.334607	0.000527511	0.00509596
ENSG00000159228	732	799	824	596	673	646	CBR1	carbonyl reductase 1 [Source:HGNC Symbol;Acc:1548]	-0.327442	0.00360494	0.0251907
ENSG00000186951	700	671	721	582	547	504	PPARA	peroxisome proliferator-activated receptor alpha [Source:HGNC Symbol;Acc:9232]	-0.325604	3.77e-05	0.000504265
ENSG00000165672	5388	5203	6001	4661	4991	4368	PRDX3	peroxiredoxin 3 [Source:HGNC Symbol;Acc:9354]	-0.323797	0.000103735	0.00124298
ENSG00000138413	3692	3437	3714	2984	3064	2854	IDH1	isocitrate dehydrogenase 1 (NADP+), soluble [Source:HGNC Symbol;Acc:5382]	-0.319706	0.00546791	0.0353409
ENSG00000197296	360	358	347	264	316	287	FITM2	fat storage-inducing transmembrane protein 2 [Source:HGNC Symbol;Acc:16135]	-0.314627	0.00566014	0.0362616
ENSG00000116237	3807	3878	4055	3073	3161	3097	ICMT	isoprenylcysteine carboxyl methyltransferase [Source:HGNC Symbol;Acc:5350]	-0.314225	0.00672282	0.0416336
ENSG00000124181	509	442	433	364	359	380	PLCG1	phospholipase C, gamma 1 [Source:HGNC Symbol;Acc:9065]	-0.311865	0.00114047	0.00978932
ENSG00000090857	677	680	631	527	521	545	PDPR	pyruvate dehydrogenase phosphatase regulatory subunit [Source:HGNC Symbol;Acc:30264]	-0.303291	7.35e-05	0.00091139
ENSG00000116171	2269	2063	2089	1800	1878	1682	SCP2	sterol carrier protein 2 [Source:HGNC Symbol;Acc:10606]	-0.302359	0.00592325	0.0375159
ENSG00000136231	1671	1619	1568	1338	1369	1300	IGF2BP3	insulin-like growth factor 2 mRNA binding protein 3 [Source:HGNC Symbol;Acc:28868]	-0.29903	0.00716478	0.0439254
ENSG00000128928	1521	1503	1492	1235	1181	1234	IVD	isovaleryl-CoA dehydrogenase [Source:HGNC Symbol;Acc:6186]	-0.285365	0.000737217	0.00675984
ENSG00000147475	725	717	732	607	607	589	ERLIN2	ER lipid raft associated 2 [Source:HGNC Symbol;Acc:1356]	-0.284162	2.63e-06	4.51e-05
ENSG00000172831	567	544	562	459	457	447	CES2	carboxylesterase 2 [Source:HGNC Symbol;Acc:1864]	-0.276207	0.00275086	0.0202657
ENSG00000084092	864	895	835	703	692	757	NOA1	nitric oxide associated 1 [Source:HGNC Symbol;Acc:28473]	-0.268543	9.1e-05	0.00110384
ENSG00000143149	1859	1790	1771	1492	1570	1492	ALDH9A1	aldehyde dehydrogenase 9 family, member A1 [Source:HGNC Symbol;Acc:412]	-0.263729	1.36e-05	0.000202986
ENSG00000159445	450	484	471	403	388	394	THEM4	thioesterase superfamily member 4 [Source:HGNC Symbol;Acc:17947]	-0.262977	0.00458282	0.0307426
ENSG00000006007	3380	3301	3246	2844	2964	2991	GDE1	glycerophosphodiester phosphodiesterase 1 [Source:HGNC Symbol;Acc:29644]	-0.175032	0.00183737	0.0145697
ENSG00000084090	7356	7089	7203	6477	6558	6406	STARD7	StAR-related lipid transfer (START) domain containing 7 [Source:HGNC Symbol;Acc:18063]	-0.173301	0.000185606	0.00207563
ENSG00000163541	1680	1541	1579	1391	1382	1462	SUCLG1	succinate-CoA ligase, alpha subunit [Source:HGNC Symbol;Acc:11449]	-0.171957	0.00274245	0.0202231
ENSG00000040933	379	387	413	464	428	467	INPP4A	inositol polyphosphate-4-phosphatase, type I, 107kDa [Source:HGNC Symbol;Acc:6074]	0.212936	0.0080666	0.0485277
ENSG00000197081	3411	3534	3302	4231	3900	4064	IGF2R	insulin-like growth factor 2 receptor [Source:HGNC Symbol;Acc:5467]	0.271161	0.000138647	0.00160448
ENSG00000073792	752	713	656	884	782	864	IGF2BP2	insulin-like growth factor 2 mRNA binding protein 2 [Source:HGNC Symbol;Acc:28867]	0.274863	0.000377183	0.00383953
ENSG00000132170	3679	3304	3555	4202	4195	4373	PPARG	peroxisome proliferator-activated receptor gamma [Source:HGNC Symbol;Acc:9236]	0.292053	4.02e-05	0.000530835
ENSG00000186188	1027	1070	1040	1288	1307	1315	FFAR4	free fatty acid receptor 4 [Source:HGNC Symbol;Acc:19061]	0.299967	0.000409608	0.00412965
ENSG00000165389	249	228	284	315	310	323	SPTSSA	serine palmitoyltransferase, small subunit A [Source:HGNC Symbol;Acc:20361]	0.316835	0.00585841	0.0372306
ENSG00000096433	5710	6172	5859	7074	7152	7544	ITPR3	inositol 1,4,5-trisphosphate receptor, type 3 [Source:HGNC Symbol;Acc:6182]	0.317837	0.000134091	0.00155555
ENSG00000158669	1380	1434	1317	1720	1714	1696	AGPAT6	1-acylglycerol-3-phosphate O-acyltransferase 6 [Source:HGNC Symbol;Acc:20880]	0.322522	2.96e-07	5.89e-06
ENSG00000135587	343	345	384	434	459	427	SMPD2	sphingomyelin phosphodiesterase 2, neutral membrane (neutral sphingomyelinase) [Source:HGNC Symbol;Acc:11121]	0.324518	0.0061593	0.0387647
ENSG00000197142	6976	6489	6324	7965	8565	8335	ACSL5	acyl-CoA synthetase long-chain family member 5 [Source:HGNC Symbol;Acc:16526]	0.331252	1.85e-08	4.33e-07
ENSG00000102780	923	986	843	1212	1103	1128	DGKH	diacylglycerol kinase, eta [Source:HGNC Symbol;Acc:2854]	0.339841	0.00134902	0.0112432
ENSG00000138193	314	309	239	390	375	374	PLCE1	phospholipase C, epsilon 1 [Source:HGNC Symbol;Acc:17175]	0.381558	0.0031158	0.0223968
ENSG00000107789	217	232	255	308	328	320	MINPP1	multiple inositol-polyphosphate phosphatase 1 [Source:HGNC Symbol;Acc:7102]	0.384771	0.00151425	0.0123967
ENSG00000177076	164	144	178	205	250	210	ACER2	alkaline ceramidase 2 [Source:HGNC Symbol;Acc:23675]	0.386567	0.00301439	0.0217624
ENSG00000066322	2769	2692	2746	3507	3788	3756	ELOVL1	ELOVL fatty acid elongase 1 [Source:HGNC Symbol;Acc:14418]	0.444611	1.31e-07	2.73e-06
ENSG00000101216	820	997	1046	1258	1240	1328	GMEB2	glucocorticoid modulatory element binding protein 2 [Source:HGNC Symbol;Acc:4371]	0.44541	0.00177669	0.0141478
ENSG00000173465	393	369	470	490	570	568	SSSCA1	Sjogren syndrome/scleroderma autoantigen 1 [Source:HGNC Symbol;Acc:11328]	0.461216	0.00606087	0.0382724
ENSG00000143398	1829	1736	1827	2417	2465	2532	PIP5K1A	phosphatidylinositol-4-phosphate 5-kinase, type I, alpha [Source:HGNC Symbol;Acc:8994]	0.463217	3.5e-13	1.26e-11
ENSG00000077044	695	781	778	1068	953	1059	DGKD	diacylglycerol kinase, delta 130kDa [Source:HGNC Symbol;Acc:2851]	0.480073	1.42e-06	2.54e-05
ENSG00000100558	754	727	784	1008	1065	1091	PLEK2	pleckstrin 2 [Source:HGNC Symbol;Acc:19238]	0.499336	2.61e-10	7.48e-09
ENSG00000241878	645	690	759	977	891	1045	PISD	phosphatidylserine decarboxylase [Source:HGNC Symbol;Acc:8999]	0.504201	3.36e-06	5.65e-05
ENSG00000171680	93	101	105	144	133	148	PLEKHG5	pleckstrin homology domain containing, family G (with RhoGef domain) member 5 [Source:HGNC Symbol;Acc:29105]	0.520874	0.00539586	0.0349586
ENSG00000150995	142	149	119	202	171	204	ITPR1	inositol 1,4,5-trisphosphate receptor, type 1 [Source:HGNC Symbol;Acc:6180]	0.525287	0.000109073	0.00129792
ENSG00000221968	272	299	307	407	377	450	FADS3	fatty acid desaturase 3 [Source:HGNC Symbol;Acc:3576]	0.526237	0.000267497	0.00286982
ENSG00000118515	3753	3537	3806	5317	5374	5557	SGK1	serum/glucocorticoid regulated kinase 1 [Source:HGNC Symbol;Acc:10810]	0.532599	6.41e-11	1.96e-09
ENSG00000187134	156	122	130	188	219	209	AKR1C1	aldo-keto reductase family 1, member C1 [Source:HGNC Symbol;Acc:384]	0.540819	0.00710227	0.0436411
ENSG00000184792	65	68	83	95	119	107	OSBP2	oxysterol binding protein 2 [Source:HGNC Symbol;Acc:8504]	0.565439	0.00335968	0.0238106
ENSG00000167508	393	501	486	602	693	731	MVD	mevalonate (diphospho) decarboxylase [Source:HGNC Symbol;Acc:7529]	0.570004	0.0019838	0.0154507
ENSG00000068745	740	735	765	1104	1059	1125	IP6K2	inositol hexakisphosphate kinase 2 [Source:HGNC Symbol;Acc:17313]	0.577821	7.38e-19	3.91e-17
ENSG00000104549	10005	9349	9770	14475	14990	14802	SQLE	squalene epoxidase [Source:HGNC Symbol;Acc:11279]	0.595311	2.12e-13	7.82e-12
ENSG00000113161	4365	4149	4307	6762	6785	6375	HMGCR	3-hydroxy-3-methylglutaryl-CoA reductase [Source:HGNC Symbol;Acc:5006]	0.599748	0.000356264	0.00366199
ENSG00000221963	644	624	636	977	968	938	APOL6	apolipoprotein L, 6 [Source:HGNC Symbol;Acc:14870]	0.601058	1.11e-16	5.15e-15
ENSG00000164023	1680	1645	1753	2756	2733	2661	SGMS2	sphingomyelin synthase 2 [Source:HGNC Symbol;Acc:28395]	0.63037	0.000257495	0.00277474
ENSG00000183569	52	52	54	100	60	87	SERHL2	serine hydrolase-like 2 [Source:HGNC Symbol;Acc:29446]	0.654155	0.00583839	0.0371523
ENSG00000148840	1004	976	1006	1531	1508	1618	PPRC1	peroxisome proliferator-activated receptor gamma, coactivator-related 1 [Source:HGNC Symbol;Acc:30025]	0.673162	7.07e-19	3.75e-17
ENSG00000166311	59	75	96	113	121	129	SMPD1	sphingomyelin phosphodiesterase 1, acid lysosomal [Source:HGNC Symbol;Acc:11120]	0.675806	0.00116479	0.0099596
ENSG00000105699	2516	2899	2860	4049	4443	4574	LSR	lipolysis stimulated lipoprotein receptor [Source:HGNC Symbol;Acc:29572]	0.681303	8.21e-06	0.000128759
ENSG00000167676	120	138	99	194	208	166	PLIN4	perilipin 4 [Source:HGNC Symbol;Acc:29393]	0.686037	9.45e-05	0.00114204
ENSG00000239713	35	33	37	49	61	60	APOBEC3G	apolipoprotein B mRNA editing enzyme, catalytic polypeptide-like 3G [Source:HGNC Symbol;Acc:17357]	0.690741	0.00367365	0.0255859
ENSG00000139289	2739	2934	2973	5372	4951	4433	PHLDA1	pleckstrin homology-like domain, family A, member 1 [Source:HGNC Symbol;Acc:8933]	0.711102	0.00114573	0.00982552
ENSG00000144959	1173	1178	1257	1996	2103	2022	NCEH1	neutral cholesterol ester hydrolase 1 [Source:HGNC Symbol;Acc:29260]	0.72355	7.77e-20	4.33e-18
ENSG00000161533	3262	2990	2896	5338	5071	4989	ACOX1	acyl-CoA oxidase 1, palmitoyl [Source:HGNC Symbol;Acc:119]	0.741763	8.9e-29	7e-27
ENSG00000134324	386	380	398	663	595	665	LPIN1	lipin 1 [Source:HGNC Symbol;Acc:13345]	0.747784	1.07e-19	5.97e-18
ENSG00000176531	84	96	122	164	155	173	PHLDB3	pleckstrin homology-like domain, family B, member 3 [Source:HGNC Symbol;Acc:30499]	0.766491	7.54e-05	0.000932085
ENSG00000054983	25	29	20	44	48	35	GALC	galactosylceramidase [Source:HGNC Symbol;Acc:4115]	0.781664	0.00750059	0.0456885
ENSG00000144824	112	99	92	177	188	167	PHLDB2	pleckstrin homology-like domain, family B, member 2 [Source:HGNC Symbol;Acc:29573]	0.786003	5.46e-08	1.19e-06
ENSG00000148154	1333	1313	1426	2660	2594	2243	UGCG	UDP-glucose ceramide glucosyltransferase [Source:HGNC Symbol;Acc:12524]	0.792602	0.000576817	0.00551323
ENSG00000126822	819	834	795	1407	1390	1432	PLEKHG3	pleckstrin homology domain containing, family G (with RhoGef domain) member 3 [Source:HGNC Symbol;Acc:20364]	0.827754	3.22e-17	1.52e-15
ENSG00000174307	241	216	254	367	443	452	PHLDA3	pleckstrin homology-like domain, family A, member 3 [Source:HGNC Symbol;Acc:8934]	0.84441	2.26e-07	4.55e-06
ENSG00000179750	217	200	208	327	389	405	APOBEC3B	apolipoprotein B mRNA editing enzyme, catalytic polypeptide-like 3B [Source:HGNC Symbol;Acc:17352]	0.848526	1.58e-11	5.11e-10
ENSG00000243811	22	25	17	38	36	36	APOBEC3D	apolipoprotein B mRNA editing enzyme, catalytic polypeptide-like 3D [Source:HGNC Symbol;Acc:17354]	0.85036	0.00245901	0.0185082
ENSG00000105559	152	167	169	258	294	314	PLEKHA4	pleckstrin homology domain containing, family A (phosphoinositide binding specific) member 4 [Source:HGNC Symbol;Acc:14339]	0.860191	1.46e-09	3.88e-08
ENSG00000169710	3700	5499	5246	8569	8457	8810	FASN	fatty acid synthase [Source:HGNC Symbol;Acc:3594]	0.873475	4.14e-07	8.09e-06
ENSG00000148841	129	130	153	263	233	261	ITPRIP	inositol 1,4,5-trisphosphate receptor interacting protein [Source:HGNC Symbol;Acc:29370]	0.901662	4.01e-11	1.25e-09
ENSG00000138678	766	782	684	1429	1370	1459	AGPAT9	1-acylglycerol-3-phosphate O-acyltransferase 9 [Source:HGNC Symbol;Acc:28157]	0.909295	2.68e-15	1.14e-13
ENSG00000180263	620	615	651	1320	1130	1191	FGD6	FYVE, RhoGEF and PH domain containing 6 [Source:HGNC Symbol;Acc:21740]	0.946527	4.65e-15	1.94e-13
ENSG00000213398	14	26	16	40	33	36	LCAT	lecithin-cholesterol acyltransferase [Source:HGNC Symbol;Acc:6522]	1.00448	0.00179178	0.0142381
ENSG00000141458	1113	1161	1152	2194	2245	2399	NPC1	Niemann-Pick disease, type C1 [Source:HGNC Symbol;Acc:7897]	1.00667	8.87e-57	1.34e-54
ENSG00000169403	42	53	54	112	89	97	PTAFR	platelet-activating factor receptor [Source:HGNC Symbol;Acc:9582]	1.01911	1.05e-09	2.85e-08
ENSG00000241839	313	333	307	663	712	627	PLEKHO2	pleckstrin homology domain containing, family O member 2 [Source:HGNC Symbol;Acc:30026]	1.06765	2.42e-26	1.73e-24
ENSG00000183506	62	58	59	160	82	132	PI4KAP2	phosphatidylinositol 4-kinase, catalytic, alpha pseudogene 2 [Source:HGNC Symbol;Acc:33577]	1.11362	4.97e-05	0.000641591
ENSG00000008323	386	418	387	811	821	883	PLEKHG6	pleckstrin homology domain containing, family G (with RhoGef domain) member 6 [Source:HGNC Symbol;Acc:25562]	1.11749	1.15e-15	4.98e-14
ENSG00000101670	2365	2212	2374	5568	5376	5241	LIPG	lipase, endothelial [Source:HGNC Symbol;Acc:6623]	1.21639	9.63e-92	2.5e-89
ENSG00000186480	2497	2613	2701	7119	7065	6295	INSIG1	insulin induced gene 1 [Source:HGNC Symbol;Acc:6083]	1.34308	4.31e-48	5.41e-46
ENSG00000112033	315	278	317	851	798	853	PPARD	peroxisome proliferator-activated receptor delta [Source:HGNC Symbol;Acc:9235]	1.47766	4.93e-51	6.54e-49
ENSG00000112972	3265	3503	3014	10735	10354	9938	HMGCS1	3-hydroxy-3-methylglutaryl-CoA synthase 1 (soluble) [Source:HGNC Symbol;Acc:5007]	1.61874	1.42e-14	5.72e-13
ENSG00000181649	488	697	794	1945	2244	2293	PHLDA2	pleckstrin homology-like domain, family A, member 2 [Source:HGNC Symbol;Acc:12385]	1.73237	6.81e-17	3.19e-15
ENSG00000171608	15	10	4	38	25	37	PIK3CD	phosphatidylinositol-4,5-bisphosphate 3-kinase, catalytic subunit delta [Source:HGNC Symbol;Acc:8977]	1.86233	7.84e-08	1.67e-06
ENSG00000163082	493	505	489	1986	1843	1816	SGPP2	sphingosine-1-phosphate phosphatase 2 [Source:HGNC Symbol;Acc:19953]	1.92002	6.17e-81	1.36e-78
ENSG00000105499	10	4	0	22	22	20	PLA2G4C	phospholipase A2, group IVC (cytosolic, calcium-independent) [Source:HGNC Symbol;Acc:9037]	2.18389	3.4e-06	5.71e-05
ENSG00000130164	2901	3060	3217	14072	13781	14447	LDLR	low density lipoprotein receptor [Source:HGNC Symbol;Acc:6547]	2.23998	3.64e-99	1.01e-96
ENSG00000112096	1784	1893	1808	13502	11640	10630	SOD2	superoxide dismutase 2, mitochondrial [Source:HGNC Symbol;Acc:11180]	2.69209	7.15e-167	2.95e-164
ENSG00000086544	542	544	576	7388	7059	7900	ITPKC	inositol-trisphosphate 3-kinase C [Source:HGNC Symbol;Acc:14897]	3.75655	3.18e-209	1.88e-206
ENSG00000136247	862	857	953	673	759	739	ZDHHC4	zinc finger, DHHC-type containing 4 [Source:HGNC Symbol;Acc:18471]	-0.328656	0.000693893	0.00644369
ENSG00000153786	1507	1515	1489	1228	1302	1290	ZDHHC7	zinc finger, DHHC-type containing 7 [Source:HGNC Symbol;Acc:18459]	-0.248686	0.000221008	0.00242011
ENSG00000161647	68	61	73	108	89	111	MPP3	membrane protein, palmitoylated 3 (MAGUK p55 subfamily member 3) [Source:HGNC Symbol;Acc:7221]	0.667535	0.000446963	0.00444067
ENSG00000148377	0	0	0	0	5	6	IDI2	isopentenyl-diphosphate delta isomerase 2 [Source:HGNC Symbol;Acc:23487]	4.47102	0.00247572	0.0186111
ENSG00000236011	31	0	0	0	0	0	GPANK1	G patch domain and ankyrin repeats 1 [Source:HGNC Symbol;Acc:13920]	-19.7263	1.7e-14	6.8e-13
ENSG00000235333	0	0	3	0	0	0	PVRIG2P	poliovirus receptor related immunoglobulin domain containing 2, pseudogene [Source:HGNC Symbol;Acc:48897]	-16.4486	3.3e-07	6.51e-06
ENSG00000204315	0	0	62	0	0	0	FKBPL	FK506 binding protein like [Source:HGNC Symbol;Acc:13949]	-6.88443	0.00133668	0.0111699
ENSG00000230907	0	0	62	0	0	0	FKBPL	FK506 binding protein like [Source:HGNC Symbol;Acc:13949]	-6.88443	0.00133668	0.0111699
ENSG00000255330	11	3	9	0	0	0		C6orf174 protein [Source:UniProtKB/TrEMBL;Acc:A5PLQ8]	-5.54622	0.00811286	0.0487269
ENSG00000254559	11	0	9	0	0	0			-5.05127	0.00806247	0.0485183
ENSG00000148300	4	50	4	0	0	3	REXO4	REX4, RNA exonuclease 4 homolog (S. cerevisiae) [Source:HGNC Symbol;Acc:12820]	-4.0944	0.00255176	0.0190843
ENSG00000183722	0	2	7	0	0	0	LHFP	lipoma HMGIC fusion partner [Source:HGNC Symbol;Acc:6586]	-4.02959	0.00269011	0.0198758
ENSG00000262023	0	9	0	0	0	0		Homo sapiens jerky homolog (mouse) (JRK), transcript variant 2, mRNA. [Source:RefSeq mRNA;Acc:NM_001077527]	-4.01226	0.005232	0.0340718
ENSG00000232938	5	4	0	0	0	0			-3.76139	0.00712926	0.043736
ENSG00000225589	51	85	7	8	2	2	MDC1	mediator of DNA-damage checkpoint 1 [Source:HGNC Symbol;Acc:21163]	-3.37074	0.000689355	0.00641097
ENSG00000234012	51	85	7	8	2	2	MDC1	mediator of DNA-damage checkpoint 1 [Source:HGNC Symbol;Acc:21163]	-3.37074	0.000689355	0.00641097
ENSG00000062370	127	109	95	0	34	16	ZNF112	zinc finger protein 112 [Source:HGNC Symbol;Acc:12892]	-3.25411	5.9e-07	1.12e-05
ENSG00000180884	312	379	315	43	41	28	ZNF792	zinc finger protein 792 [Source:HGNC Symbol;Acc:24751]	-3.20257	5.14e-65	9.11e-63
ENSG00000213801	31	176	40	10	24	12	ZNF816-ZNF321P	ZNF816-ZNF321P readthrough [Source:HGNC Symbol;Acc:38879]	-3.03955	0.000993164	0.00868628
ENSG00000188868	21	19	23	4	5	0	ZNF563	zinc finger protein 563 [Source:HGNC Symbol;Acc:30498]	-2.96352	0.00020446	0.00226376
ENSG00000095596	14	4	9	0	2	2	CYP26A1	cytochrome P450, family 26, subfamily A, polypeptide 1 [Source:HGNC Symbol;Acc:2603]	-2.89356	0.000924458	0.00820278
ENSG00000167183	134	112	126	17	22	13	PRR15L	proline rich 15-like [Source:HGNC Symbol;Acc:28149]	-2.77037	5.12e-15	2.14e-13
ENSG00000140465	491	517	555	99	77	69	CYP1A1	cytochrome P450, family 1, subfamily A, polypeptide 1 [Source:HGNC Symbol;Acc:2595]	-2.69071	2.99e-39	3.12e-37
ENSG00000198416	31	38	14	0	0	12			-2.67368	0.00396752	0.0273014
ENSG00000176020	100	127	148	30	9	25	AMIGO3	adhesion molecule with Ig-like domain 3 [Source:HGNC Symbol;Acc:24075]	-2.55612	8.57e-06	0.000133415
ENSG00000165556	17	29	37	8	3	3	CDX2	caudal type homeobox 2 [Source:HGNC Symbol;Acc:1806]	-2.484	1.01e-07	2.11e-06
ENSG00000106031	1052	980	1029	225	253	171	HOXA13	homeobox A13 [Source:HGNC Symbol;Acc:5102]	-2.35072	2.35e-39	2.47e-37
ENSG00000203943	15	18	30	3	2	7	SAMD13	sterile alpha motif domain containing 13 [Source:HGNC Symbol;Acc:24582]	-2.33406	4.62e-05	0.000603811
ENSG00000184564	913	795	794	185	194	152	SLITRK6	SLIT and NTRK-like family, member 6 [Source:HGNC Symbol;Acc:23503]	-2.33224	9.17e-48	1.14e-45
ENSG00000004809	8	10	9	2	3	1	SLC22A16	solute carrier family 22 (organic cation/carnitine transporter), member 16 [Source:HGNC Symbol;Acc:20302]	-2.29007	0.00572712	0.0366288
ENSG00000164056	370	371	347	79	61	83	SPRY1	sprouty homolog 1, antagonist of FGF signaling (Drosophila) [Source:HGNC Symbol;Acc:11269]	-2.27316	1.82e-56	2.73e-54
ENSG00000168646	1056	1199	1066	208	238	248	AXIN2	axin 2 [Source:HGNC Symbol;Acc:904]	-2.26406	5.37e-80	1.17e-77
ENSG00000197857	65	83	72	9	40	6	ZNF44	zinc finger protein 44 [Source:HGNC Symbol;Acc:13110]	-2.21705	0.000480823	0.00472689
ENSG00000163884	51	37	43	12	11	7	KLF15	Kruppel-like factor 15 [Source:HGNC Symbol;Acc:14536]	-2.19147	9.74e-11	2.93e-09
ENSG00000175538	550	495	510	126	127	103	KCNE3	potassium voltage-gated channel, Isk-related family, member 3 [Source:HGNC Symbol;Acc:6243]	-2.12245	1.13e-46	1.37e-44
ENSG00000102678	166	127	135	41	32	32	FGF9	fibroblast growth factor 9 [Source:HGNC Symbol;Acc:3687]	-2.10827	6.55e-14	2.5e-12
ENSG00000005073	518	535	471	105	145	126	HOXA11	homeobox A11 [Source:HGNC Symbol;Acc:5101]	-2.08758	4.91e-58	7.81e-56
ENSG00000179348	1580	1662	1499	365	368	382	GATA2	GATA binding protein 2 [Source:HGNC Symbol;Acc:4171]	-2.05308	1.36e-61	2.32e-59
ENSG00000196826	39	61	37	7	10	18			-2.02855	0.00107938	0.00934542
ENSG00000254473	19	13	27	5	7	4			-1.91228	3.6e-05	0.000484683
ENSG00000112486	16	11	13	5	1	5	CCR6	chemokine (C-C motif) receptor 6 [Source:HGNC Symbol;Acc:1607]	-1.87917	0.00430107	0.0291937
ENSG00000187626	103	90	54	23	16	26	ZKSCAN4	zinc finger with KRAB and SCAN domains 4 [Source:HGNC Symbol;Acc:13854]	-1.86555	1.6e-11	5.15e-10
ENSG00000204335	37	47	39	9	10	11	SP5	Sp5 transcription factor [Source:HGNC Symbol;Acc:14529]	-1.8408	4.76e-06	7.8e-05
ENSG00000178917	19	17	6	0	9	5	ZNF852	zinc finger protein 852 [Source:HGNC Symbol;Acc:27713]	-1.80184	0.00589822	0.0373949
ENSG00000115507	22	13	29	10	1	7	OTX1	orthodenticle homeobox 1 [Source:HGNC Symbol;Acc:8521]	-1.79207	0.000162541	0.00184714
ENSG00000175311	203	184	178	51	66	59	ANKS4B	ankyrin repeat and sterile alpha motif domain containing 4B [Source:HGNC Symbol;Acc:26795]	-1.78723	3.43e-16	1.54e-14
ENSG00000166387	405	415	443	113	135	123	PPFIBP2	PTPRF interacting protein, binding protein 2 (liprin beta 2) [Source:HGNC Symbol;Acc:9250]	-1.77669	1.13e-25	7.88e-24
ENSG00000196409	39	30	44	15	17	4	ZNF658	zinc finger protein 658 [Source:HGNC Symbol;Acc:25226]	-1.7726	0.000266009	0.00285673
ENSG00000159882	163	130	133	46	43	41	ZNF230	zinc finger protein 230 [Source:HGNC Symbol;Acc:13024]	-1.75904	1.09e-13	4.09e-12
ENSG00000106004	261	268	251	74	87	81	HOXA5	homeobox A5 [Source:HGNC Symbol;Acc:5106]	-1.74453	1.01e-27	7.59e-26
ENSG00000189298	42	33	39	6	8	19	ZKSCAN3	zinc finger with KRAB and SCAN domains 3 [Source:HGNC Symbol;Acc:13853]	-1.74281	4.44e-07	8.61e-06
ENSG00000196793	115	92	145	31	22	62	ZNF239	zinc finger protein 239 [Source:HGNC Symbol;Acc:13031]	-1.71635	0.00809767	0.0486682
ENSG00000187566	24	23	17	9	7	6	NHLRC1	NHL repeat containing E3 ubiquitin protein ligase 1 [Source:HGNC Symbol;Acc:21576]	-1.70733	0.00214954	0.0165062
ENSG00000120696	169	184	234	54	86	68	KBTBD7	kelch repeat and BTB (POZ) domain containing 7 [Source:HGNC Symbol;Acc:25266]	-1.69996	8e-11	2.43e-09
ENSG00000254837	99	104	85	35	34	28			-1.69762	4.66e-08	1.03e-06
ENSG00000175087	376	446	397	128	134	137	PDIK1L	PDLIM1 interacting kinase 1 like [Source:HGNC Symbol;Acc:18981]	-1.6667	2.41e-21	1.46e-19
ENSG00000174684	139	152	122	41	37	50	B3GNT1	UDP-GlcNAc:betaGal beta-1,3-N-acetylglucosaminyltransferase 1 [Source:HGNC Symbol;Acc:15685]	-1.66268	1.62e-17	7.79e-16
ENSG00000159915	37	32	32	11	11	12	ZNF233	zinc finger protein 233 [Source:HGNC Symbol;Acc:30946]	-1.65271	0.000214975	0.00236772
ENSG00000168062	19	18	23	4	3	12	BATF2	basic leucine zipper transcription factor, ATF-like 2 [Source:HGNC Symbol;Acc:25163]	-1.64878	0.000329712	0.00342438
ENSG00000143971	335	338	325	106	125	121	ETAA1	Ewing tumor-associated antigen 1 [Source:HGNC Symbol;Acc:24648]	-1.6409	2.37e-09	6.15e-08
ENSG00000272679	148	98	139	63	61	19			-1.62174	0.00108492	0.00938056
ENSG00000184898	29	21	40	7	5	18	RBM43	RNA binding motif protein 43 [Source:HGNC Symbol;Acc:24790]	-1.61204	0.000239846	0.00260381
ENSG00000240204	11	11	13	2	2	7	SMKR1	small lysine-rich protein 1 [Source:HGNC Symbol;Acc:43561]	-1.61153	0.00587987	0.0373035
ENSG00000105991	71	54	63	23	20	19	HOXA1	homeobox A1 [Source:HGNC Symbol;Acc:5099]	-1.59987	1.22e-09	3.26e-08
ENSG00000228630	240	188	209	57	89	76	HOTAIR	HOX transcript antisense RNA [Source:HGNC Symbol;Acc:33510]	-1.5828	1.21e-11	3.97e-10
ENSG00000150347	601	559	608	206	203	188	ARID5B	AT rich interactive domain 5B (MRF1-like) [Source:HGNC Symbol;Acc:17362]	-1.58229	6.02e-33	5.31e-31
ENSG00000117289	1055	919	974	341	333	321	TXNIP	thioredoxin interacting protein [Source:HGNC Symbol;Acc:16952]	-1.57282	4.01e-34	3.62e-32
ENSG00000187801	32	40	34	14	16	10	ZFP69B	ZFP69 zinc finger protein B [Source:HGNC Symbol;Acc:28053]	-1.56892	0.000121114	0.00142332
ENSG00000152433	43	21	34	12	6	13	ZNF547	zinc finger protein 547 [Source:HGNC Symbol;Acc:26432]	-1.56415	0.000457742	0.00452818
ENSG00000213062	16	19	19	8	6	5			-1.55953	0.00476653	0.0317132
ENSG00000197128	42	43	43	14	8	20	ZNF772	zinc finger protein 772 [Source:HGNC Symbol;Acc:33106]	-1.55723	7.11e-05	0.000885303
ENSG00000168661	190	187	153	62	69	54	ZNF30	zinc finger protein 30 [Source:HGNC Symbol;Acc:13090]	-1.55082	4.65e-10	1.3e-08
ENSG00000110811	12	10	16	3	5	5	LEPREL2	leprecan-like 2 [Source:HGNC Symbol;Acc:19318]	-1.54642	0.00150503	0.0123582
ENSG00000078399	301	404	398	116	94	166	HOXA9	homeobox A9 [Source:HGNC Symbol;Acc:5109]	-1.53516	2.66e-12	9.17e-11
ENSG00000197841	306	294	320	130	126	103	ZNF181	zinc finger protein 181 [Source:HGNC Symbol;Acc:12971]	-1.53234	0.00162104	0.0131291
ENSG00000164093	134	155	163	56	60	43	PITX2	paired-like homeodomain 2 [Source:HGNC Symbol;Acc:9005]	-1.52794	2.79e-12	9.59e-11
ENSG00000016082	209	185	196	73	77	61	ISL1	ISL LIM homeobox 1 [Source:HGNC Symbol;Acc:6132]	-1.51985	4.25e-14	1.65e-12
ENSG00000186446	23	21	27	9	8	10	ZNF501	zinc finger protein 501 [Source:HGNC Symbol;Acc:23717]	-1.50616	0.00265767	0.0196821
ENSG00000196227	700	672	781	252	249	278	FAM217B	family with sequence similarity 217, member B [Source:HGNC Symbol;Acc:16170]	-1.50443	7.24e-30	5.83e-28
ENSG00000234602	22	25	26	11	8	7	MCIDAS	multiciliate differentiation and DNA synthesis associated cell cycle protein [Source:HGNC Symbol;Acc:40050]	-1.48834	0.000246725	0.00266779
ENSG00000185551	383	419	407	137	148	151	NR2F2	nuclear receptor subfamily 2, group F, member 2 [Source:HGNC Symbol;Acc:7976]	-1.48388	7.07e-27	5.13e-25
ENSG00000196378	82	70	57	18	30	26	ZNF34	zinc finger protein 34 [Source:HGNC Symbol;Acc:13098]	-1.48337	1.01e-08	2.42e-07
ENSG00000179023	433	467	453	176	113	171	KLHDC7A	kelch domain containing 7A [Source:HGNC Symbol;Acc:26791]	-1.47682	1.37e-17	6.68e-16
ENSG00000180938	318	321	308	119	100	108	ZNF572	zinc finger protein 572 [Source:HGNC Symbol;Acc:26758]	-1.47676	1.02e-09	2.78e-08
ENSG00000125378	4054	4139	4113	1361	1533	1499	BMP4	bone morphogenetic protein 4 [Source:HGNC Symbol;Acc:1071]	-1.47003	1.41e-53	2.06e-51
ENSG00000226314	29	14	21	7	9	7	ZNF192P1	zinc finger protein 192 pseudogene 1 [Source:HGNC Symbol;Acc:18777]	-1.46065	0.00478236	0.0317772
ENSG00000197782	998	981	979	400	397	335	ZNF780A	zinc finger protein 780A [Source:HGNC Symbol;Acc:27603]	-1.45658	6.34e-08	1.37e-06
ENSG00000198331	273	317	245	102	108	104	HYLS1	hydrolethalus syndrome 1 [Source:HGNC Symbol;Acc:26558]	-1.44342	1.29e-16	5.97e-15
ENSG00000188959	83	125	112	44	49	30	C9orf152	chromosome 9 open reading frame 152 [Source:HGNC Symbol;Acc:31455]	-1.43797	2.68e-07	5.35e-06
ENSG00000198944	43	42	43	13	22	11	SOWAHA	sosondowah ankyrin repeat domain family member A [Source:HGNC Symbol;Acc:27033]	-1.42154	0.000436908	0.00435849
ENSG00000181754	44	41	36	19	14	13	AMIGO1	adhesion molecule with Ig-like domain 1 [Source:HGNC Symbol;Acc:20824]	-1.42067	2.85e-05	0.000393594
ENSG00000176697	12	25	19	5	7	9	BDNF	brain-derived neurotrophic factor [Source:HGNC Symbol;Acc:1033]	-1.40473	0.000338261	0.00349973
ENSG00000254369	101	101	86	29	40	40	HOXA-AS3	HOXA cluster antisense RNA 3 [Source:HGNC Symbol;Acc:43748]	-1.40227	1.75e-08	4.12e-07
ENSG00000198081	508	479	487	186	233	185	ZBTB14	zinc finger and BTB domain containing 14 [Source:HGNC Symbol;Acc:12860]	-1.3724	3.9e-31	3.23e-29
ENSG00000150594	127	130	149	59	56	46	ADRA2A	adrenoceptor alpha 2A [Source:HGNC Symbol;Acc:281]	-1.36424	3.58e-08	8.05e-07
ENSG00000082497	62	58	57	33	33	13	SERTAD4	SERTA domain containing 4 [Source:HGNC Symbol;Acc:25236]	-1.36206	0.000976853	0.00858835
ENSG00000139263	222	186	159	64	87	72	LRIG3	leucine-rich repeats and immunoglobulin-like domains 3 [Source:HGNC Symbol;Acc:30991]	-1.36004	9.72e-11	2.93e-09
ENSG00000123080	107	120	116	48	51	36	CDKN2C	cyclin-dependent kinase inhibitor 2C (p18, inhibits CDK4) [Source:HGNC Symbol;Acc:1789]	-1.35843	3.32e-12	1.12e-10
ENSG00000130701	44	74	62	25	15	29	RBBP8NL	RBBP8 N-terminal like [Source:HGNC Symbol;Acc:16144]	-1.3581	6.16e-05	0.000775322
ENSG00000149300	35	42	39	9	22	16	C11orf52	chromosome 11 open reading frame 52 [Source:HGNC Symbol;Acc:30531]	-1.35696	4.73e-05	0.000615353
ENSG00000262600	35	42	39	9	22	16	C11orf52	chromosome 11 open reading frame 52 [Source:HGNC Symbol;Acc:30531]	-1.35696	4.73e-05	0.000615353
ENSG00000221886	109	112	125	58	48	41	C5orf54	chromosome 5 open reading frame 54 [Source:HGNC Symbol;Acc:30804]	-1.35191	6.84e-06	0.000109054
ENSG00000077684	825	846	863	352	333	323	JADE1	jade family PHD finger 1 [Source:HGNC Symbol;Acc:30027]	-1.34662	4.49e-62	7.72e-60
ENSG00000152804	22	38	26	8	15	11	HHEX	hematopoietically expressed homeobox [Source:HGNC Symbol;Acc:4901]	-1.34073	7.86e-05	0.000968126
ENSG00000123364	12	11	30	12	5	4	HOXC13	homeobox C13 [Source:HGNC Symbol;Acc:5125]	-1.33357	0.00747325	0.04561
ENSG00000256294	106	96	82	37	45	36	ZNF225	zinc finger protein 225 [Source:HGNC Symbol;Acc:13018]	-1.33224	0.000152326	0.0017394
ENSG00000138172	64	56	75	23	27	27	CALHM2	calcium homeostasis modulator 2 [Source:HGNC Symbol;Acc:23493]	-1.33032	6.58e-08	1.42e-06
ENSG00000132669	540	477	500	194	203	197	RIN2	Ras and Rab interactor 2 [Source:HGNC Symbol;Acc:18750]	-1.32692	2.53e-27	1.87e-25
ENSG00000106006	52	65	69	22	37	15	HOXA6	homeobox A6 [Source:HGNC Symbol;Acc:5107]	-1.32578	1.33e-05	0.000199413
ENSG00000197044	121	144	113	51	53	53	ZNF441	zinc finger protein 441 [Source:HGNC Symbol;Acc:20875]	-1.31593	5.81e-05	0.000734163
ENSG00000049283	47	88	50	21	16	33	EPN3	epsin 3 [Source:HGNC Symbol;Acc:18235]	-1.31158	0.000346738	0.00357767
ENSG00000182359	78	71	109	34	43	38	KBTBD3	kelch repeat and BTB (POZ) domain containing 3 [Source:HGNC Symbol;Acc:22934]	-1.3097	1.03e-06	1.85e-05
ENSG00000221909	149	150	149	60	73	63	FAM200A	family with sequence similarity 200, member A [Source:HGNC Symbol;Acc:25401]	-1.305	3.3e-11	1.04e-09
ENSG00000176024	107	86	89	40	34	41	ZNF613	zinc finger protein 613 [Source:HGNC Symbol;Acc:25827]	-1.29985	1.63e-06	2.88e-05
ENSG00000253293	1205	1233	1376	486	583	518	HOXA10	homeobox A10 [Source:HGNC Symbol;Acc:5100]	-1.29847	2.4e-34	2.18e-32
ENSG00000198464	52	42	50	20	23	21	ZNF480	zinc finger protein 480 [Source:HGNC Symbol;Acc:23305]	-1.29492	0.00511066	0.033408
ENSG00000128242	24	25	26	9	10	10	GAL3ST1	galactose-3-O-sulfotransferase 1 [Source:HGNC Symbol;Acc:24240]	-1.29305	0.00563602	0.0361315
ENSG00000132825	372	432	441	159	191	172	PPP1R3D	protein phosphatase 1, regulatory subunit 3D [Source:HGNC Symbol;Acc:9294]	-1.28985	6.86e-14	2.61e-12
ENSG00000111276	498	559	684	243	252	237	CDKN1B	cyclin-dependent kinase inhibitor 1B (p27, Kip1) [Source:HGNC Symbol;Acc:1785]	-1.28507	5.27e-21	3.08e-19
ENSG00000178096	69	78	69	29	31	29	BOLA1	bolA family member 1 [Source:HGNC Symbol;Acc:24263]	-1.26946	5.92e-07	1.12e-05
ENSG00000163155	32	32	44	14	12	18	LYSMD1	LysM, putative peptidoglycan-binding, domain containing 1 [Source:HGNC Symbol;Acc:32070]	-1.26247	1.59e-05	0.000232851
ENSG00000154529	21	30	23	17	0	11	CNTNAP3B	contactin associated protein-like 3B [Source:HGNC Symbol;Acc:32035]	-1.26217	0.00353714	0.0248268
ENSG00000197372	127	130	129	51	45	64	ZNF675	zinc finger protein 675 [Source:HGNC Symbol;Acc:30768]	-1.25562	0.000777773	0.00708712
ENSG00000178935	935	860	834	358	385	353	ZNF552	zinc finger protein 552 [Source:HGNC Symbol;Acc:26135]	-1.25459	5.91e-22	3.67e-20
ENSG00000083817	246	218	199	81	96	106	ZNF416	zinc finger protein 416 [Source:HGNC Symbol;Acc:20645]	-1.25004	9.23e-14	3.48e-12
ENSG00000112796	44	35	44	22	16	14	ENPP5	ectonucleotide pyrophosphatase/phosphodiesterase 5 (putative) [Source:HGNC Symbol;Acc:13717]	-1.2497	0.00259388	0.0193061
ENSG00000249709	219	191	199	91	102	76	ZNF564	zinc finger protein 564 [Source:HGNC Symbol;Acc:31106]	-1.24901	1.06e-11	3.49e-10
ENSG00000262028	52	52	49	13	31	25	FDXACB1	ferredoxin-fold anticodon binding domain containing 1 [Source:HGNC Symbol;Acc:25110]	-1.24698	2.85e-05	0.000393539
ENSG00000241186	50	58	49	23	28	19	TDGF1	teratocarcinoma-derived growth factor 1 [Source:HGNC Symbol;Acc:11701]	-1.22967	6.46e-05	0.000810003
ENSG00000186272	281	303	277	113	148	121	ZNF17	zinc finger protein 17 [Source:HGNC Symbol;Acc:12958]	-1.22886	7.9e-17	3.69e-15
ENSG00000178386	142	136	132	50	64	63	ZNF223	zinc finger protein 223 [Source:HGNC Symbol;Acc:13016]	-1.22828	4.47e-08	9.91e-07
ENSG00000013392	65	72	59	28	32	26	RWDD2A	RWD domain containing 2A [Source:HGNC Symbol;Acc:21385]	-1.22671	3.3e-08	7.44e-07
ENSG00000183778	47	57	57	17	24	29	B3GALT5	UDP-Gal:betaGlcNAc beta 1,3-galactosyltransferase, polypeptide 5 [Source:HGNC Symbol;Acc:920]	-1.20375	0.000179707	0.0020192
ENSG00000186026	91	80	76	46	36	29	ZNF284	zinc finger protein 284 [Source:HGNC Symbol;Acc:13078]	-1.19769	7.69e-05	0.000948086
ENSG00000254290	226	212	183	96	89	84			-1.1967	2.42e-06	4.17e-05
ENSG00000176714	82	61	80	42	26	27	CCDC121	coiled-coil domain containing 121 [Source:HGNC Symbol;Acc:25833]	-1.19107	8.65e-05	0.00105689
ENSG00000181690	234	245	325	138	126	106	PLAG1	pleiomorphic adenoma gene 1 [Source:HGNC Symbol;Acc:9045]	-1.18742	5.53e-05	0.000704527
ENSG00000117010	59	72	93	24	42	39	ZNF684	zinc finger protein 684 [Source:HGNC Symbol;Acc:28418]	-1.18396	2.46e-05	0.000343229
ENSG00000183647	105	102	90	41	39	48	ZNF530	zinc finger protein 530 [Source:HGNC Symbol;Acc:29297]	-1.18339	5.21e-08	1.14e-06
ENSG00000100105	454	440	451	195	182	203	PATZ1	POZ (BTB) and AT hook containing zinc finger 1 [Source:HGNC Symbol;Acc:13071]	-1.18118	3.73e-20	2.12e-18
ENSG00000177721	114	118	109	52	44	49	ANXA2R	annexin A2 receptor [Source:HGNC Symbol;Acc:33463]	-1.18026	3.86e-08	8.63e-07
ENSG00000177096	72	78	73	33	40	25	FAM109B	family with sequence similarity 109, member B [Source:HGNC Symbol;Acc:27161]	-1.17389	3.52e-05	0.000474954
ENSG00000122644	965	987	1040	457	477	470	ARL4A	ADP-ribosylation factor-like 4A [Source:HGNC Symbol;Acc:695]	-1.17346	3.6e-08	8.08e-07
ENSG00000188343	37	39	60	23	27	17	FAM92A1	family with sequence similarity 92, member A1 [Source:HGNC Symbol;Acc:30452]	-1.17136	0.00044702	0.00444067
ENSG00000181004	68	72	67	29	42	26	BBS12	Bardet-Biedl syndrome 12 [Source:HGNC Symbol;Acc:26648]	-1.1691	4.4e-05	0.000578284
ENSG00000057704	268	273	271	141	111	114	TMCC3	transmembrane and coiled-coil domain family 3 [Source:HGNC Symbol;Acc:29199]	-1.16518	3.6e-19	1.93e-17
ENSG00000120093	485	486	476	210	228	208	HOXB3	homeobox B3 [Source:HGNC Symbol;Acc:5114]	-1.16202	9.24e-22	5.66e-20
ENSG00000120075	47	54	32	19	19	22	HOXB5	homeobox B5 [Source:HGNC Symbol;Acc:5116]	-1.15965	0.000182461	0.00204458
ENSG00000240990	222	201	239	99	100	90	HOXA11-AS	HOXA11 antisense RNA [Source:HGNC Symbol;Acc:24957]	-1.15846	1.76e-11	5.65e-10
ENSG00000116574	567	539	520	230	287	256	RHOU	ras homolog family member U [Source:HGNC Symbol;Acc:17794]	-1.15662	5.42e-22	3.39e-20
ENSG00000105516	33	33	26	9	14	18	DBP	D site of albumin promoter (albumin D-box) binding protein [Source:HGNC Symbol;Acc:2697]	-1.15653	0.00115865	0.00991841
ENSG00000180346	306	284	281	142	148	127	TIGD2	tigger transposable element derived 2 [Source:HGNC Symbol;Acc:18333]	-1.15378	3.27e-06	5.51e-05
ENSG00000161653	39	34	27	20	14	10	NAGS	N-acetylglutamate synthase [Source:HGNC Symbol;Acc:17996]	-1.15301	0.000691778	0.0064272
ENSG00000229043	24	20	32	15	8	12			-1.15225	0.00153639	0.0125509
ENSG00000089335	292	316	265	139	168	122	ZNF302	zinc finger protein 302 [Source:HGNC Symbol;Acc:13848]	-1.15141	0.000202259	0.00224201
ENSG00000198807	39	29	34	14	20	18	PAX9	paired box 9 [Source:HGNC Symbol;Acc:8623]	-1.14835	0.000647432	0.00610132
ENSG00000165572	553	509	526	251	253	232	KBTBD6	kelch repeat and BTB (POZ) domain containing 6 [Source:HGNC Symbol;Acc:25340]	-1.14632	1.5e-23	9.97e-22
ENSG00000255561	52	61	53	21	34	25	FDXACB1	ferredoxin-fold anticodon binding domain containing 1 [Source:HGNC Symbol;Acc:25110]	-1.14533	1.79e-05	0.000258966
ENSG00000204611	194	184	185	80	93	89	ZNF616	zinc finger protein 616 [Source:HGNC Symbol;Acc:28062]	-1.13888	4.71e-05	0.000614196
ENSG00000158691	291	285	271	124	110	136	ZSCAN12	zinc finger and SCAN domain containing 12 [Source:HGNC Symbol;Acc:13172]	-1.13855	2.64e-13	9.65e-12
ENSG00000131115	368	422	232	179	154	123	ZNF227	zinc finger protein 227 [Source:HGNC Symbol;Acc:13020]	-1.13738	8.89e-06	0.000137534
ENSG00000108733	187	138	166	73	77	81	PEX12	peroxisomal biogenesis factor 12 [Source:HGNC Symbol;Acc:8854]	-1.13429	2.04e-05	0.000290315
ENSG00000146757	821	801	835	443	418	364	ZNF92	zinc finger protein 92 [Source:HGNC Symbol;Acc:13168]	-1.12995	0.000986047	0.00864399
ENSG00000103343	147	144	123	55	60	72	ZNF174	zinc finger protein 174 [Source:HGNC Symbol;Acc:12963]	-1.12712	4.69e-09	1.18e-07
ENSG00000178966	267	272	288	135	112	143	RMI1	RecQ mediated genome instability 1 [Source:HGNC Symbol;Acc:25764]	-1.12671	0.000714463	0.00657987
ENSG00000124575	3809	3557	3458	1521	1704	1690	HIST1H1D	histone cluster 1, H1d [Source:HGNC Symbol;Acc:4717]	-1.12662	2.55e-20	1.46e-18
ENSG00000162757	156	155	166	78	75	65	C1orf74	chromosome 1 open reading frame 74 [Source:HGNC Symbol;Acc:26319]	-1.11396	2.86e-12	9.77e-11
ENSG00000096654	289	258	258	123	149	117	ZNF184	zinc finger protein 184 [Source:HGNC Symbol;Acc:12975]	-1.11172	0.00507393	0.0332367
ENSG00000241549	22	42	43	17	24	16	GUSBP2	glucuronidase, beta pseudogene 2 [Source:HGNC Symbol;Acc:18792]	-1.10914	0.00365925	0.0255231
ENSG00000267680	325	292	291	130	151	148	ZNF224	zinc finger protein 224 [Source:HGNC Symbol;Acc:13017]	-1.10909	2.35e-06	4.05e-05
ENSG00000232838	185	194	238	85	142	84	PET117	PET117 homolog (S. cerevisiae) [Source:HGNC Symbol;Acc:40045]	-1.10615	8.3e-08	1.76e-06
ENSG00000197062	111	83	105	48	52	51			-1.10411	1.81e-05	0.000261173
ENSG00000167384	414	438	413	202	202	199	ZNF180	zinc finger protein 180 [Source:HGNC Symbol;Acc:12970]	-1.09315	2e-10	5.77e-09
ENSG00000116833	301	263	332	165	157	119	NR5A2	nuclear receptor subfamily 5, group A, member 2 [Source:HGNC Symbol;Acc:7984]	-1.09025	1.34e-06	2.4e-05
ENSG00000121417	228	201	212	82	103	114	ZNF211	zinc finger protein 211 [Source:HGNC Symbol;Acc:13003]	-1.09017	9.03e-14	3.41e-12
ENSG00000183779	148	170	193	74	93	73	ZNF703	zinc finger protein 703 [Source:HGNC Symbol;Acc:25883]	-1.08843	1.45e-05	0.000214352
ENSG00000257512	139	126	119	66	64	56			-1.08726	4.56e-05	0.000596416
ENSG00000256594	43	42	59	21	25	26			-1.08657	0.000300056	0.0031548
ENSG00000128694	69	79	86	45	36	33	OSGEPL1	O-sialoglycoprotein endopeptidase-like 1 [Source:HGNC Symbol;Acc:23075]	-1.08282	6.01e-06	9.74e-05
ENSG00000127081	291	296	331	166	137	138	ZNF484	zinc finger protein 484 [Source:HGNC Symbol;Acc:23385]	-1.07792	0.000210972	0.00232744
ENSG00000188993	32	44	39	22	16	18	LRRC66	leucine rich repeat containing 66 [Source:HGNC Symbol;Acc:34299]	-1.07699	0.00342193	0.0241794
ENSG00000138061	4392	4501	4819	2453	2333	1986	CYP1B1	cytochrome P450, family 1, subfamily B, polypeptide 1 [Source:HGNC Symbol;Acc:2597]	-1.07639	1.5e-18	7.68e-17
ENSG00000095002	1244	1249	1618	780	693	592	MSH2	mutS homolog 2 [Source:HGNC Symbol;Acc:7325]	-1.07494	0.000308256	0.00322591
ENSG00000134138	1035	970	930	491	449	453	MEIS2	Meis homeobox 2 [Source:HGNC Symbol;Acc:7001]	-1.07302	1.46e-28	1.13e-26
ENSG00000139508	35	38	54	26	17	18	SLC46A3	solute carrier family 46, member 3 [Source:HGNC Symbol;Acc:27501]	-1.07223	0.00117446	0.0100251
ENSG00000042317	45	39	37	23	14	24	SPATA7	spermatogenesis associated 7 [Source:HGNC Symbol;Acc:20423]	-1.07212	0.0040677	0.0279198
ENSG00000130844	228	254	248	131	107	104	ZNF331	zinc finger protein 331 [Source:HGNC Symbol;Acc:15489]	-1.07067	3.04e-11	9.59e-10
ENSG00000149050	77	71	83	34	39	43	ZNF214	zinc finger protein 214 [Source:HGNC Symbol;Acc:13006]	-1.07063	0.000265745	0.00285552
ENSG00000115325	136	153	148	63	59	79	DOK1	docking protein 1, 62kDa (downstream of tyrosine kinase 1) [Source:HGNC Symbol;Acc:2990]	-1.0695	3.64e-08	8.15e-07
ENSG00000118804	68	76	77	29	39	44	FAM47E-STBD1	FAM47E-STBD1 readthrough [Source:HGNC Symbol;Acc:44667]	-1.06902	0.000437853	0.00436333
ENSG00000204947	52	72	64	38	26	26	ZNF425	zinc finger protein 425 [Source:HGNC Symbol;Acc:20690]	-1.06828	2.82e-06	4.79e-05
ENSG00000130675	132	96	79	57	41	48	MNX1	motor neuron and pancreas homeobox 1 [Source:HGNC Symbol;Acc:4979]	-1.06609	0.000252271	0.00272309
ENSG00000160993	262	286	262	118	136	123	ALKBH4	alkB, alkylation repair homolog 4 (E. coli) [Source:HGNC Symbol;Acc:21900]	-1.06268	4.34e-08	9.65e-07
ENSG00000179981	268	288	288	140	135	125	TSHZ1	teashirt zinc finger homeobox 1 [Source:HGNC Symbol;Acc:10669]	-1.06108	6.55e-20	3.7e-18
ENSG00000166529	120	208	85	55	59	67	ZSCAN21	zinc finger and SCAN domain containing 21 [Source:HGNC Symbol;Acc:13104]	-1.05737	0.00447198	0.030127
ENSG00000164294	156	136	136	62	77	77	GPX8	glutathione peroxidase 8 (putative) [Source:HGNC Symbol;Acc:33100]	-1.05514	1.42e-07	2.94e-06
ENSG00000256646	639	560	565	287	298	282		Proteasome subunit alpha type-2 [Source:UniProtKB/TrEMBL;Acc:H3BT36]	-1.05416	3.01e-16	1.35e-14
ENSG00000138449	1165	1220	1469	652	693	618	SLC40A1	solute carrier family 40 (iron-regulated transporter), member 1 [Source:HGNC Symbol;Acc:10909]	-1.052	5.07e-08	1.12e-06
ENSG00000008226	22	27	17	15	9	7	DLEC1	deleted in lung and esophageal cancer 1 [Source:HGNC Symbol;Acc:2899]	-1.05135	0.00821716	0.0492458
ENSG00000151623	36	28	34	21	27	5	NR3C2	nuclear receptor subfamily 3, group C, member 2 [Source:HGNC Symbol;Acc:7979]	-1.0455	0.00185614	0.0146879
ENSG00000185920	130	147	133	75	69	50	PTCH1	patched 1 [Source:HGNC Symbol;Acc:9585]	-1.04539	1.03e-09	2.79e-08
ENSG00000173598	10213	10605	11419	5869	5753	4922	NUDT4	nudix (nucleoside diphosphate linked moiety X)-type motif 4 [Source:HGNC Symbol;Acc:8051]	-1.04373	2.53e-08	5.84e-07
ENSG00000178826	857	863	801	385	463	401	TMEM139	transmembrane protein 139 [Source:HGNC Symbol;Acc:22058]	-1.04089	1.11e-18	5.78e-17
ENSG00000122863	52	63	47	31	17	30	CHST3	carbohydrate (chondroitin 6) sulfotransferase 3 [Source:HGNC Symbol;Acc:1971]	-1.03518	1e-05	0.000153124
ENSG00000138433	295	227	310	152	138	139	CIR1	corepressor interacting with RBPJ, 1 [Source:HGNC Symbol;Acc:24217]	-1.03354	0.000963459	0.00851279
ENSG00000151490	218	172	215	104	93	92	PTPRO	protein tyrosine phosphatase, receptor type, O [Source:HGNC Symbol;Acc:9678]	-1.03233	9.41e-06	0.000144739
ENSG00000128266	29	32	37	24	12	13	GNAZ	guanine nucleotide binding protein (G protein), alpha z polypeptide [Source:HGNC Symbol;Acc:4395]	-1.03011	0.000702403	0.00648456
ENSG00000184939	133	130	133	54	81	69	ZFP90	ZFP90 zinc finger protein [Source:HGNC Symbol;Acc:23329]	-1.02948	4.28e-06	7.07e-05
ENSG00000144354	1319	1238	1331	653	700	655	CDCA7	cell division cycle associated 7 [Source:HGNC Symbol;Acc:14628]	-1.028	1.42e-31	1.19e-29
ENSG00000183161	584	641	722	345	339	313	FANCF	Fanconi anemia, complementation group F [Source:HGNC Symbol;Acc:3587]	-1.02751	2.58e-14	1.01e-12
ENSG00000166192	100	115	133	58	67	45	SENP8	SUMO/sentrin specific peptidase family member 8 [Source:HGNC Symbol;Acc:22992]	-1.02637	1.42e-05	0.000210598
ENSG00000263002	338	286	281	167	128	152	ZNF234	zinc finger protein 234 [Source:HGNC Symbol;Acc:13027]	-1.02577	5.01e-09	1.25e-07
ENSG00000160051	187	210	159	76	99	97	IQCC	IQ motif containing C [Source:HGNC Symbol;Acc:25545]	-1.02538	5.04e-09	1.26e-07
ENSG00000143363	299	275	264	86	178	177	PRUNE	prune exopolyphosphatase [Source:HGNC Symbol;Acc:13420]	-1.02446	1.25e-05	0.000188602
ENSG00000143013	2624	2732	2963	1417	1445	1374	LMO4	LIM domain only 4 [Source:HGNC Symbol;Acc:6644]	-1.0129	1.66e-20	9.58e-19
ENSG00000180855	214	206	215	127	126	81	ZNF443	zinc finger protein 443 [Source:HGNC Symbol;Acc:20878]	-1.01085	0.00335577	0.0237918
ENSG00000090447	315	290	315	144	154	156	TFAP4	transcription factor AP-4 (activating enhancer binding protein 4) [Source:HGNC Symbol;Acc:11745]	-1.01058	6.37e-15	2.63e-13
ENSG00000230259	197	180	218	92	119	100			-1.00773	4.95e-06	8.1e-05
ENSG00000256683	83	97	80	38	41	47	ZNF350	zinc finger protein 350 [Source:HGNC Symbol;Acc:16656]	-1.00546	0.00198792	0.0154639
ENSG00000215012	1918	1924	1818	889	968	935	C22orf29	chromosome 22 open reading frame 29 [Source:HGNC Symbol;Acc:26112]	-1.00453	4.79e-41	5.25e-39
ENSG00000196812	133	135	109	62	56	70	ZSCAN16	zinc finger and SCAN domain containing 16 [Source:HGNC Symbol;Acc:20813]	-1.00339	2.39e-06	4.13e-05
ENSG00000273045	166	164	171	85	76	89		Uncharacterized protein C2orf15 [Source:UniProtKB/Swiss-Prot;Acc:Q8WU43]	-1.00303	5.61e-07	1.07e-05
ENSG00000136122	1306	1203	1164	628	671	598	BORA	bora, aurora kinase A activator [Source:HGNC Symbol;Acc:24724]	-0.998483	0.000137966	0.00159757
ENSG00000181894	219	206	211	98	136	92	ZNF329	zinc finger protein 329 [Source:HGNC Symbol;Acc:14209]	-0.99696	1.43e-11	4.65e-10
ENSG00000196357	220	168	205	96	104	110	ZNF565	zinc finger protein 565 [Source:HGNC Symbol;Acc:26726]	-0.996517	2.36e-05	0.000331676
ENSG00000175745	174	194	162	96	91	84	NR2F1	nuclear receptor subfamily 2, group F, member 1 [Source:HGNC Symbol;Acc:7975]	-0.994556	3.3e-14	1.29e-12
ENSG00000173275	125	133	123	70	65	67	ZNF449	zinc finger protein 449 [Source:HGNC Symbol;Acc:21039]	-0.992424	2.43e-05	0.000340121
ENSG00000081386	297	291	298	140	152	165	ZNF510	zinc finger protein 510 [Source:HGNC Symbol;Acc:29161]	-0.990791	3.97e-05	0.000526794
ENSG00000118513	470	400	413	213	236	214	MYB	v-myb avian myeloblastosis viral oncogene homolog [Source:HGNC Symbol;Acc:7545]	-0.988743	4.03e-18	2.02e-16
ENSG00000167536	143	141	172	73	84	68	DHRS13	dehydrogenase/reductase (SDR family) member 13 [Source:HGNC Symbol;Acc:28326]	-0.984452	1.09e-06	1.96e-05
ENSG00000168116	319	319	322	169	213	151	KIAA1586	KIAA1586 [Source:HGNC Symbol;Acc:21360]	-0.980418	0.00537204	0.034864
ENSG00000259943	75	71	102	46	36	41			-0.980192	0.000379898	0.00386301
ENSG00000120068	114	95	86	52	50	51	HOXB8	homeobox B8 [Source:HGNC Symbol;Acc:5119]	-0.975865	8.12e-06	0.000127582
ENSG00000115738	814	752	815	422	436	386	ID2	inhibitor of DNA binding 2, dominant negative helix-loop-helix protein [Source:HGNC Symbol;Acc:5361]	-0.971586	4.08e-31	3.34e-29
ENSG00000153294	78	84	77	36	25	60	GPR115	G protein-coupled receptor 115 [Source:HGNC Symbol;Acc:19011]	-0.970568	0.00294517	0.0213658
ENSG00000163067	146	164	115	63	70	76	ZNF2	zinc finger protein 2 [Source:HGNC Symbol;Acc:12991]	-0.969794	7.52e-09	1.85e-07
ENSG00000116205	172	177	181	89	83	100	TCEANC2	transcription elongation factor A (SII) N-terminal and central domain containing 2 [Source:HGNC Symbol;Acc:26494]	-0.969369	1.24e-08	2.97e-07
ENSG00000104081	110	148	119	49	75	76	BMF	Bcl2 modifying factor [Source:HGNC Symbol;Acc:24132]	-0.968127	8.29e-06	0.000129898
ENSG00000147118	161	136	135	70	82	75	ZNF182	zinc finger protein 182 [Source:HGNC Symbol;Acc:13001]	-0.967075	9.74e-06	0.000148864
ENSG00000196150	160	119	136	57	75	81	ZNF250	zinc finger protein 250 [Source:HGNC Symbol;Acc:13044]	-0.964835	5.1e-08	1.12e-06
ENSG00000177981	440	390	367	195	224	204	ASB8	ankyrin repeat and SOCS box containing 8 [Source:HGNC Symbol;Acc:17183]	-0.963307	7.19e-17	3.36e-15
ENSG00000196214	715	652	645	348	387	328	ZNF766	zinc finger protein 766 [Source:HGNC Symbol;Acc:28063]	-0.962738	2.81e-09	7.26e-08
ENSG00000213186	540	567	669	346	339	293	TRIM59	tripartite motif containing 59 [Source:HGNC Symbol;Acc:30834]	-0.962415	2.06e-08	4.79e-07
ENSG00000196544	66	60	76	26	40	38	C17orf59	chromosome 17 open reading frame 59 [Source:HGNC Symbol;Acc:25939]	-0.959323	0.000483389	0.00474718
ENSG00000125846	176	207	188	107	101	87	ZNF133	zinc finger protein 133 [Source:HGNC Symbol;Acc:12917]	-0.958485	1.57e-09	4.15e-08
ENSG00000023171	1396	1422	1317	684	737	703	GRAMD1B	GRAM domain containing 1B [Source:HGNC Symbol;Acc:29214]	-0.956828	1.45e-29	1.16e-27
ENSG00000123485	1882	1841	1742	857	981	977	HJURP	Holliday junction recognition protein [Source:HGNC Symbol;Acc:25444]	-0.956589	5.25e-40	5.62e-38
ENSG00000261351	50	55	72	32	26	33			-0.948249	0.00105752	0.00919816
ENSG00000173041	361	401	477	240	263	212	ZNF680	zinc finger protein 680 [Source:HGNC Symbol;Acc:26897]	-0.947416	0.000742752	0.00679743
ENSG00000185442	411	398	360	210	202	195	FAM174B	family with sequence similarity 174, member B [Source:HGNC Symbol;Acc:34339]	-0.947	3.17e-13	1.14e-11
ENSG00000088876	158	134	163	76	67	91	ZNF343	zinc finger protein 343 [Source:HGNC Symbol;Acc:16017]	-0.946751	5.29e-10	1.47e-08
ENSG00000198551	225	217	192	103	113	121	ZNF627	zinc finger protein 627 [Source:HGNC Symbol;Acc:30570]	-0.944604	2.8e-06	4.77e-05
ENSG00000120162	67	67	67	43	27	31	MOB3B	MOB kinase activator 3B [Source:HGNC Symbol;Acc:23825]	-0.943684	0.000424619	0.00426059
ENSG00000132938	108	98	85	51	66	59	MTUS2	microtubule associated tumor suppressor candidate 2 [Source:HGNC Symbol;Acc:20595]	-0.942714	0.0031077	0.0223594
ENSG00000227450	20	32	42	17	23	13		Uncharacterized protein; cDNA FLJ52623 [Source:UniProtKB/TrEMBL;Acc:B7Z235]	-0.938397	0.00793131	0.0478201
ENSG00000108511	239	314	272	141	117	158	HOXB6	homeobox B6 [Source:HGNC Symbol;Acc:5117]	-0.935018	4.42e-09	1.11e-07
ENSG00000135093	176	150	155	82	100	77	USP30	ubiquitin specific peptidase 30 [Source:HGNC Symbol;Acc:20065]	-0.933118	5.63e-08	1.22e-06
ENSG00000254876	32	35	30	13	20	18			-0.931217	0.0070225	0.0432351
ENSG00000253251	139	122	109	66	76	70		CDNA FLJ26957 fis, clone SLV00486; Uncharacterized protein [Source:UniProtKB/TrEMBL;Acc:Q6ZNX1]	-0.922109	0.00429354	0.0291739
ENSG00000173281	360	336	371	210	174	189	PPP1R3B	protein phosphatase 1, regulatory subunit 3B [Source:HGNC Symbol;Acc:14942]	-0.920967	9.94e-15	4.06e-13
ENSG00000125848	123	136	171	81	109	70	FLRT3	fibronectin leucine rich transmembrane protein 3 [Source:HGNC Symbol;Acc:3762]	-0.920967	0.000534118	0.00514666
ENSG00000203761	66	55	60	19	49	32	MSTO2P	misato family member 2, pseudogene [Source:HGNC Symbol;Acc:26329]	-0.91768	0.00547359	0.0353655
ENSG00000114315	636	705	718	344	385	366	HES1	hes family bHLH transcription factor 1 [Source:HGNC Symbol;Acc:5192]	-0.913344	2.29e-19	1.24e-17
ENSG00000105708	130	104	110	67	57	64	ZNF14	zinc finger protein 14 [Source:HGNC Symbol;Acc:12924]	-0.912636	0.00091551	0.00813481
ENSG00000204920	103	105	109	53	42	62	ZNF155	zinc finger protein 155 [Source:HGNC Symbol;Acc:12940]	-0.91064	3.29e-05	0.000447088
ENSG00000151332	120	113	149	57	67	79	MBIP	MAP3K12 binding inhibitory protein 1 [Source:HGNC Symbol;Acc:20427]	-0.906908	3.07e-05	0.000421786
ENSG00000136653	311	270	268	142	151	161	RASSF5	Ras association (RalGDS/AF-6) domain family member 5 [Source:HGNC Symbol;Acc:17609]	-0.905339	1.84e-05	0.000264969
ENSG00000173566	50	53	53	25	24	31	NUDT18	nudix (nucleoside diphosphate linked moiety X)-type motif 18 [Source:HGNC Symbol;Acc:26194]	-0.903807	0.000474037	0.00466502
ENSG00000030419	301	264	269	161	143	142	IKZF2	IKAROS family zinc finger 2 (Helios) [Source:HGNC Symbol;Acc:13177]	-0.903718	0.000209956	0.00231919
ENSG00000243766	90	78	89	49	35	41	HOTTIP	HOXA distal transcript antisense RNA [Source:HGNC Symbol;Acc:37461]	-0.902256	0.000283467	0.00301076
ENSG00000104221	123	102	110	68	44	63	BRF2	BRF2, RNA polymerase III transcription initiation factor 50 kDa subunit [Source:HGNC Symbol;Acc:17298]	-0.898374	3.52e-05	0.000475173
ENSG00000130684	172	188	178	66	95	110	ZNF337	zinc finger protein 337 [Source:HGNC Symbol;Acc:15809]	-0.897853	1.21e-06	2.17e-05
ENSG00000000457	286	285	311	148	173	151	SCYL3	SCY1-like 3 (S. cerevisiae) [Source:HGNC Symbol;Acc:19285]	-0.895971	1.1e-11	3.61e-10
ENSG00000196757	276	228	281	151	136	144	ZNF700	zinc finger protein 700 [Source:HGNC Symbol;Acc:25292]	-0.895236	0.000444293	0.00442285
ENSG00000188283	110	98	87	52	49	56	ZNF383	zinc finger protein 383 [Source:HGNC Symbol;Acc:18609]	-0.89414	0.000169168	0.00191212
ENSG00000127152	37	50	50	24	24	24	BCL11B	B-cell CLL/lymphoma 11B (zinc finger protein) [Source:HGNC Symbol;Acc:13222]	-0.892467	0.00746709	0.045587
ENSG00000198477	24	40	37	20	15	21	ZNF280B	zinc finger protein 280B [Source:HGNC Symbol;Acc:23022]	-0.88978	0.00414216	0.0282771
ENSG00000240857	268	249	311	170	160	132	RDH14	retinol dehydrogenase 14 (all-trans/9-cis/11-cis) [Source:HGNC Symbol;Acc:19979]	-0.889584	1.27e-06	2.28e-05
ENSG00000188321	108	90	99	50	49	61	ZNF559	zinc finger protein 559 [Source:HGNC Symbol;Acc:28197]	-0.886643	0.00375516	0.0260387
ENSG00000070718	439	411	414	200	250	235	AP3M2	adaptor-related protein complex 3, mu 2 subunit [Source:HGNC Symbol;Acc:570]	-0.883527	8.77e-16	3.84e-14
ENSG00000102984	43	47	46	18	34	24	ZNF821	zinc finger protein 821 [Source:HGNC Symbol;Acc:28043]	-0.883153	0.00133573	0.0111699
ENSG00000143867	43	66	64	28	37	27	OSR1	odd-skipped related transciption factor 1 [Source:HGNC Symbol;Acc:8111]	-0.882862	0.00555994	0.035777
ENSG00000171243	245	199	246	122	123	127	SOSTDC1	sclerostin domain containing 1 [Source:HGNC Symbol;Acc:21748]	-0.881164	2.04e-05	0.000290315
ENSG00000135083	175	168	188	99	102	92	CCNJL	cyclin J-like [Source:HGNC Symbol;Acc:25876]	-0.881003	1.92e-09	5e-08
ENSG00000169740	116	114	118	56	67	74	ZNF32	zinc finger protein 32 [Source:HGNC Symbol;Acc:13095]	-0.879445	1.56e-07	3.2e-06
ENSG00000196456	114	99	132	53	66	71	ZNF775	zinc finger protein 775 [Source:HGNC Symbol;Acc:28501]	-0.879337	0.000173074	0.00195162
ENSG00000111554	191	199	195	110	98	109	MDM1	Mdm1 nuclear protein homolog (mouse) [Source:HGNC Symbol;Acc:29917]	-0.877641	6.27e-07	1.18e-05
ENSG00000065970	184	180	198	91	107	112	FOXJ2	forkhead box J2 [Source:HGNC Symbol;Acc:24818]	-0.877576	5.66e-11	1.74e-09
ENSG00000159885	109	96	123	52	75	58	ZNF222	zinc finger protein 222 [Source:HGNC Symbol;Acc:13015]	-0.874914	0.00476044	0.0316983
ENSG00000137040	806	778	851	452	523	440	RANBP6	RAN binding protein 6 [Source:HGNC Symbol;Acc:9851]	-0.871767	0.00116098	0.00993391
ENSG00000253552	119	141	122	67	64	72	HOXA-AS2	HOXA cluster antisense RNA 2 [Source:HGNC Symbol;Acc:43745]	-0.866287	2.08e-06	3.62e-05
ENSG00000177732	59	68	72	38	35	31	SOX12	SRY (sex determining region Y)-box 12 [Source:HGNC Symbol;Acc:11198]	-0.864698	0.000333958	0.003459
ENSG00000009790	59	52	53	32	28	28	TRAF3IP3	TRAF3 interacting protein 3 [Source:HGNC Symbol;Acc:30766]	-0.86446	0.000532305	0.0051318
ENSG00000160172	102	83	86	52	52	50	FAM86C2P	family with sequence similarity 86, member C2, pseudogene [Source:HGNC Symbol;Acc:42392]	-0.863344	4.33e-06	7.15e-05
ENSG00000171617	4546	4672	4747	2620	2641	2598	ENC1	ectodermal-neural cortex 1 (with BTB domain) [Source:HGNC Symbol;Acc:3345]	-0.862356	6.28e-40	6.69e-38
ENSG00000144120	264	293	281	137	169	142	TMEM177	transmembrane protein 177 [Source:HGNC Symbol;Acc:28143]	-0.861638	7.7e-10	2.1e-08
ENSG00000175643	577	566	588	342	370	287	RMI2	RecQ mediated genome instability 2 [Source:HGNC Symbol;Acc:28349]	-0.859787	1.63e-15	7.02e-14
ENSG00000180611	244	223	236	116	146	135	MB21D2	Mab-21 domain containing 2 [Source:HGNC Symbol;Acc:30438]	-0.859526	2.39e-10	6.87e-09
ENSG00000243479	80	74	92	36	45	49	MNX1-AS1	MNX1 antisense RNA 1 (head to head) [Source:HGNC Symbol;Acc:48954]	-0.85711	0.000591874	0.00564007
ENSG00000150455	155	184	152	94	95	87	TIRAP	toll-interleukin 1 receptor (TIR) domain containing adaptor protein [Source:HGNC Symbol;Acc:17192]	-0.854158	7.8e-09	1.91e-07
ENSG00000176371	180	139	149	69	64	99	ZSCAN2	zinc finger and SCAN domain containing 2 [Source:HGNC Symbol;Acc:20994]	-0.853826	0.00228355	0.0173734
ENSG00000151065	56	83	76	40	31	45	DCP1B	decapping mRNA 1B [Source:HGNC Symbol;Acc:24451]	-0.85381	6.73e-05	0.000841308
ENSG00000180257	886	695	684	409	412	425	ZNF816	zinc finger protein 816 [Source:HGNC Symbol;Acc:26995]	-0.853739	6.64e-06	0.000106013
ENSG00000134901	84	61	86	43	39	48	KDELC1	KDEL (Lys-Asp-Glu-Leu) containing 1 [Source:HGNC Symbol;Acc:19350]	-0.849828	0.000113745	0.0013459
ENSG00000173480	439	383	479	261	237	243	ZNF417	zinc finger protein 417 [Source:HGNC Symbol;Acc:20646]	-0.848943	8.36e-06	0.000130868
ENSG00000259583	207	182	195	104	115	103			-0.846994	5.57e-07	1.06e-05
ENSG00000137393	133	148	175	88	110	72	RNF144B	ring finger protein 144B [Source:HGNC Symbol;Acc:21578]	-0.846914	4e-07	7.83e-06
ENSG00000151553	187	205	225	126	116	109	FAM160B1	family with sequence similarity 160, member B1 [Source:HGNC Symbol;Acc:29320]	-0.844764	0.000975543	0.0085837
ENSG00000118690	48	33	39	21	22	26	ARMC2	armadillo repeat containing 2 [Source:HGNC Symbol;Acc:23045]	-0.843289	0.00435644	0.0295166
ENSG00000262342	182	242	294	122	145	126	VPS11	vacuolar protein sorting 11 homolog (S. cerevisiae) [Source:HGNC Symbol;Acc:14583]	-0.840444	0.000145424	0.0016737
ENSG00000183840	243	222	234	113	129	145	GPR39	G protein-coupled receptor 39 [Source:HGNC Symbol;Acc:4496]	-0.837954	2.4e-09	6.24e-08
ENSG00000198960	246	264	245	135	158	134	ARMCX6	armadillo repeat containing, X-linked 6 [Source:HGNC Symbol;Acc:26094]	-0.836602	3.09e-09	7.94e-08
ENSG00000102178	2519	2608	2635	1334	1496	1494	UBL4A	ubiquitin-like 4A [Source:HGNC Symbol;Acc:12505]	-0.835959	1.85e-17	8.82e-16
ENSG00000167380	408	409	365	210	249	223	ZNF226	zinc finger protein 226 [Source:HGNC Symbol;Acc:13019]	-0.835077	3.1e-08	7.04e-07
ENSG00000196966	90	76	57	42	33	44	HIST1H3E	histone cluster 1, H3e [Source:HGNC Symbol;Acc:4769]	-0.83453	0.0015814	0.012841
ENSG00000153767	617	545	562	339	335	300	GTF2E1	general transcription factor IIE, polypeptide 1, alpha 56kDa [Source:HGNC Symbol;Acc:4650]	-0.83435	2.03e-13	7.51e-12
ENSG00000105497	134	148	126	91	68	70	ZNF175	zinc finger protein 175 [Source:HGNC Symbol;Acc:12964]	-0.833506	8.54e-06	0.000133089
ENSG00000125945	465	451	446	267	234	262	ZNF436	zinc finger protein 436 [Source:HGNC Symbol;Acc:20814]	-0.83179	2.96e-08	6.76e-07
ENSG00000140835	83	104	90	52	56	54	CHST4	carbohydrate (N-acetylglucosamine 6-O) sulfotransferase 4 [Source:HGNC Symbol;Acc:1972]	-0.831391	0.000989654	0.00866759
ENSG00000110987	301	296	299	185	175	147	BCL7A	B-cell CLL/lymphoma 7A [Source:HGNC Symbol;Acc:1004]	-0.83055	2.68e-11	8.47e-10
ENSG00000227124	126	99	97	70	61	60	ZNF717	zinc finger protein 717 [Source:HGNC Symbol;Acc:29448]	-0.830141	0.00229926	0.0174648
ENSG00000170631	291	316	305	145	184	187	ZNF16	zinc finger protein 16 [Source:HGNC Symbol;Acc:12947]	-0.828823	2.04e-08	4.76e-07
ENSG00000198924	924	858	777	501	565	475	DCLRE1A	DNA cross-link repair 1A [Source:HGNC Symbol;Acc:17660]	-0.817339	0.000110891	0.00131584
ENSG00000171604	982	1089	1185	608	649	609	CXXC5	CXXC finger protein 5 [Source:HGNC Symbol;Acc:26943]	-0.816943	1.56e-16	7.16e-15
ENSG00000131791	239	205	238	132	169	109	PRKAB2	protein kinase, AMP-activated, beta 2 non-catalytic subunit [Source:HGNC Symbol;Acc:9379]	-0.815829	6.88e-05	0.000857866
ENSG00000168916	102	93	83	52	51	54	ZNF608	zinc finger protein 608 [Source:HGNC Symbol;Acc:29238]	-0.815106	4.76e-05	0.000618797
ENSG00000125850	97	99	89	44	48	61	OVOL2	ovo-like zinc finger 2 [Source:HGNC Symbol;Acc:15804]	-0.81205	0.00030404	0.00319099
ENSG00000171448	251	253	248	158	160	142	ZBTB26	zinc finger and BTB domain containing 26 [Source:HGNC Symbol;Acc:23383]	-0.811499	8.23e-07	1.5e-05
ENSG00000167333	230	229	257	136	128	136	TRIM68	tripartite motif containing 68 [Source:HGNC Symbol;Acc:21161]	-0.810423	7.51e-11	2.28e-09
ENSG00000101417	193	204	228	120	129	103	PXMP4	peroxisomal membrane protein 4, 24kDa [Source:HGNC Symbol;Acc:15920]	-0.809144	2.47e-07	4.95e-06
ENSG00000105072	66	61	42	35	25	33	C19orf44	chromosome 19 open reading frame 44 [Source:HGNC Symbol;Acc:26141]	-0.808756	0.000660181	0.00619132
ENSG00000080546	363	345	371	215	210	203	SESN1	sestrin 1 [Source:HGNC Symbol;Acc:21595]	-0.80726	0.000149719	0.0017148
ENSG00000183513	361	339	383	207	204	220	COA5	cytochrome c oxidase assembly factor 5 [Source:HGNC Symbol;Acc:33848]	-0.806299	2.15e-06	3.74e-05
ENSG00000188997	154	174	188	94	91	115	KCTD21	potassium channel tetramerization domain containing 21 [Source:HGNC Symbol;Acc:27452]	-0.805655	3.55e-07	6.98e-06
ENSG00000185477	91	81	92	64	50	46	GPRIN3	GPRIN family member 3 [Source:HGNC Symbol;Acc:27733]	-0.805563	0.00742287	0.0453463
ENSG00000166133	304	317	398	195	205	173	RPUSD2	RNA pseudouridylate synthase domain containing 2 [Source:HGNC Symbol;Acc:24180]	-0.80522	0.000991606	0.00867833
ENSG00000121690	94	85	96	61	57	46	DEPDC7	DEP domain containing 7 [Source:HGNC Symbol;Acc:29899]	-0.803958	0.00486321	0.032179
ENSG00000128513	620	574	652	382	453	325	POT1	protection of telomeres 1 [Source:HGNC Symbol;Acc:17284]	-0.803486	0.00228511	0.0173742
ENSG00000186918	473	436	365	245	260	217	ZNF395	zinc finger protein 395 [Source:HGNC Symbol;Acc:18737]	-0.802681	2.59e-10	7.44e-09
ENSG00000175938	151	160	228	95	115	104	ORAI3	ORAI calcium release-activated calcium modulator 3 [Source:HGNC Symbol;Acc:28185]	-0.801492	0.000185132	0.00207155
ENSG00000235109	132	113	115	64	68	77	ZSCAN31	zinc finger and SCAN domain containing 31 [Source:HGNC Symbol;Acc:14097]	-0.800558	2.85e-06	4.83e-05
ENSG00000131779	299	285	302	166	192	172	PEX11B	peroxisomal biogenesis factor 11 beta [Source:HGNC Symbol;Acc:8853]	-0.79959	1.82e-11	5.83e-10
ENSG00000020256	338	356	278	185	203	188	ZFP64	ZFP64 zinc finger protein [Source:HGNC Symbol;Acc:15940]	-0.798689	1.74e-09	4.57e-08
ENSG00000164306	168	165	185	89	128	103	PRIMPOL	primase and polymerase (DNA-directed) [Source:HGNC Symbol;Acc:26575]	-0.796393	0.00261633	0.0194368
ENSG00000150893	362	372	301	224	213	198	FREM2	FRAS1 related extracellular matrix protein 2 [Source:HGNC Symbol;Acc:25396]	-0.795718	1.09e-05	0.00016558
ENSG00000197363	72	91	76	50	52	37	ZNF517	zinc finger protein 517 [Source:HGNC Symbol;Acc:27984]	-0.794099	0.00190293	0.0149705
ENSG00000135211	385	379	393	239	260	215	TMEM60	transmembrane protein 60 [Source:HGNC Symbol;Acc:21754]	-0.79322	1.67e-06	2.95e-05
ENSG00000166821	361	342	322	196	212	203	PEX11A	peroxisomal biogenesis factor 11 alpha [Source:HGNC Symbol;Acc:8852]	-0.792219	4.29e-09	1.08e-07
ENSG00000180011	1378	1305	1371	835	811	782	ZADH2	zinc binding alcohol dehydrogenase domain containing 2 [Source:HGNC Symbol;Acc:28697]	-0.791457	6.92e-19	3.68e-17
ENSG00000151364	140	119	115	72	59	82	KCTD14	potassium channel tetramerization domain containing 14 [Source:HGNC Symbol;Acc:23295]	-0.789832	1.66e-05	0.000242256
ENSG00000164124	160	167	165	107	111	81	TMEM144	transmembrane protein 144 [Source:HGNC Symbol;Acc:25633]	-0.788391	0.00133561	0.0111699
ENSG00000243406	127	155	149	81	83	98	MRPS31P5	mitochondrial ribosomal protein S31 pseudogene 5 [Source:HGNC Symbol;Acc:39253]	-0.78737	0.000169321	0.00191271
ENSG00000164011	131	129	136	48	91	89	ZNF691	zinc finger protein 691 [Source:HGNC Symbol;Acc:28028]	-0.786284	0.00132127	0.0110802
ENSG00000121454	67	60	69	46	30	35	LHX4	LIM homeobox 4 [Source:HGNC Symbol;Acc:21734]	-0.786029	0.00268795	0.0198718
ENSG00000110042	1680	1568	1454	881	945	905	DTX4	deltex homolog 4 (Drosophila) [Source:HGNC Symbol;Acc:29151]	-0.783244	3.79e-15	1.6e-13
ENSG00000196981	251	214	234	129	148	152	WDR5B	WD repeat domain 5B [Source:HGNC Symbol;Acc:17826]	-0.77985	3.16e-06	5.35e-05
ENSG00000128000	731	700	716	478	457	395	ZNF780B	zinc finger protein 780B [Source:HGNC Symbol;Acc:33109]	-0.779547	0.00298842	0.0216244
ENSG00000177352	109	122	102	54	78	63	CCDC71	coiled-coil domain containing 71 [Source:HGNC Symbol;Acc:25760]	-0.777876	1.38e-05	0.000204366
ENSG00000152439	197	213	155	100	125	110	ZNF773	zinc finger protein 773 [Source:HGNC Symbol;Acc:30487]	-0.777238	0.0032387	0.0230944
ENSG00000165898	187	179	224	114	120	124	ISCA2	iron-sulfur cluster assembly 2 [Source:HGNC Symbol;Acc:19857]	-0.7764	2.21e-07	4.46e-06
ENSG00000120519	192	176	145	105	111	103	SLC10A7	solute carrier family 10, member 7 [Source:HGNC Symbol;Acc:23088]	-0.773958	0.000330107	0.0034266
ENSG00000205643	53	60	72	33	32	40	CDPF1	cysteine-rich, DPF motif domain containing 1 [Source:HGNC Symbol;Acc:33710]	-0.772351	0.0012242	0.0103717
ENSG00000164051	325	278	353	159	185	203	CCDC51	coiled-coil domain containing 51 [Source:HGNC Symbol;Acc:25714]	-0.771848	2.84e-09	7.32e-08
ENSG00000256235	205	202	235	131	126	117	SMIM3	small integral membrane protein 3 [Source:HGNC Symbol;Acc:30248]	-0.768673	1.78e-09	4.66e-08
ENSG00000154920	184	157	195	111	101	99	EME1	essential meiotic structure-specific endonuclease 1 [Source:HGNC Symbol;Acc:24965]	-0.767854	1.73e-08	4.07e-07
ENSG00000186130	464	440	547	319	318	288	ZBTB6	zinc finger and BTB domain containing 6 [Source:HGNC Symbol;Acc:16764]	-0.767762	0.00576205	0.0367506
ENSG00000101138	740	826	764	483	549	428	CSTF1	cleavage stimulation factor, 3' pre-RNA, subunit 1, 50kDa [Source:HGNC Symbol;Acc:2483]	-0.767379	3.17e-09	8.1e-08
ENSG00000163513	1149	1179	1168	723	716	663	TGFBR2	transforming growth factor, beta receptor II (70/80kDa) [Source:HGNC Symbol;Acc:11773]	-0.767284	9.31e-08	1.96e-06
ENSG00000138030	68	61	64	35	31	45	KHK	ketohexokinase (fructokinase) [Source:HGNC Symbol;Acc:6315]	-0.765524	0.0025337	0.0189868
ENSG00000131944	186	199	189	104	113	116	C19orf40	chromosome 19 open reading frame 40 [Source:HGNC Symbol;Acc:28467]	-0.765357	3.46e-06	5.81e-05
ENSG00000205089	97	94	83	53	54	52	CCNI2	cyclin I family, member 2 [Source:HGNC Symbol;Acc:33869]	-0.763535	0.00136638	0.0113729
ENSG00000198315	167	180	168	109	93	96	ZKSCAN8	zinc finger with KRAB and SCAN domains 8 [Source:HGNC Symbol;Acc:12983]	-0.762992	3.53e-05	0.000475621
ENSG00000034533	172	159	116	80	93	87	ASTE1	asteroid homolog 1 (Drosophila) [Source:HGNC Symbol;Acc:25021]	-0.762243	0.000280472	0.0029833
ENSG00000234616	590	715	599	355	340	385	JRK	jerky homolog (mouse) [Source:HGNC Symbol;Acc:6199]	-0.761781	0.000140601	0.00162213
ENSG00000260027	925	1008	959	579	584	539	HOXB7	homeobox B7 [Source:HGNC Symbol;Acc:5118]	-0.759966	1.85e-19	1.01e-17
ENSG00000118655	319	321	279	184	168	182	DCLRE1B	DNA cross-link repair 1B [Source:HGNC Symbol;Acc:17641]	-0.759689	2.8e-12	9.62e-11
ENSG00000168569	601	552	610	310	367	347	TMEM223	transmembrane protein 223 [Source:HGNC Symbol;Acc:28464]	-0.759394	1.03e-09	2.78e-08
ENSG00000108389	1163	1078	1035	643	717	583	MTMR4	myotubularin related protein 4 [Source:HGNC Symbol;Acc:7452]	-0.758789	2.53e-19	1.36e-17
ENSG00000153130	836	836	1103	648	670	514	SCOC	short coiled-coil protein [Source:HGNC Symbol;Acc:20335]	-0.757491	0.005935	0.0375778
ENSG00000166979	102	113	102	55	49	77	EVA1C	eva-1 homolog C (C. elegans) [Source:HGNC Symbol;Acc:13239]	-0.757386	1.46e-05	0.000216637
ENSG00000171806	201	181	211	115	143	126	METTL18	methyltransferase like 18 [Source:HGNC Symbol;Acc:28793]	-0.753896	0.00051457	0.00500926
ENSG00000106524	586	574	542	348	369	320	ANKMY2	ankyrin repeat and MYND domain containing 2 [Source:HGNC Symbol;Acc:25370]	-0.753823	2.89e-05	0.000398824
ENSG00000182742	99	100	107	63	61	56	HOXB4	homeobox B4 [Source:HGNC Symbol;Acc:5115]	-0.752302	1.48e-06	2.62e-05
ENSG00000146858	137	149	123	85	87	75	ZC3HAV1L	zinc finger CCCH-type, antiviral 1-like [Source:HGNC Symbol;Acc:22423]	-0.752224	0.00114682	0.00982599
ENSG00000137259	1114	1138	1229	635	720	681	HIST1H2AB	histone cluster 1, H2ab [Source:HGNC Symbol;Acc:4734]	-0.751989	3.17e-09	8.1e-08
ENSG00000120832	119	106	100	62	61	72	MTERFD3	MTERF domain containing 3 [Source:HGNC Symbol;Acc:30779]	-0.75189	0.000345952	0.00357346
ENSG00000180745	261	235	239	160	149	134	CLRN3	clarin 3 [Source:HGNC Symbol;Acc:20795]	-0.750932	0.0025882	0.0192883
ENSG00000109189	530	532	503	335	357	311	USP46	ubiquitin specific peptidase 46 [Source:HGNC Symbol;Acc:20075]	-0.748972	1.91e-11	6.09e-10
ENSG00000198890	269	333	434	207	246	191	PRMT6	protein arginine methyltransferase 6 [Source:HGNC Symbol;Acc:18241]	-0.747535	0.00191911	0.0150479
ENSG00000140326	438	400	420	259	249	249	CDAN1	codanin 1 [Source:HGNC Symbol;Acc:1713]	-0.744604	1.2e-07	2.5e-06
ENSG00000184619	30	27	39	20	22	17	KRBA2	KRAB-A domain containing 2 [Source:HGNC Symbol;Acc:26989]	-0.743816	0.00485125	0.0321224
ENSG00000102805	87	99	106	58	83	46	CLN5	ceroid-lipofuscinosis, neuronal 5 [Source:HGNC Symbol;Acc:2076]	-0.743742	0.00139907	0.0116042
ENSG00000041353	405	414	444	282	293	249	RAB27B	RAB27B, member RAS oncogene family [Source:HGNC Symbol;Acc:9767]	-0.742469	0.00280398	0.0205874
ENSG00000155729	237	239	234	142	138	141	KCTD18	potassium channel tetramerization domain containing 18 [Source:HGNC Symbol;Acc:26446]	-0.741887	3.66e-09	9.26e-08
ENSG00000196597	123	105	105	66	61	70	ZNF782	zinc finger protein 782 [Source:HGNC Symbol;Acc:33110]	-0.740884	0.000669586	0.00625783
ENSG00000185875	405	364	334	266	224	203	THNSL1	threonine synthase-like 1 (S. cerevisiae) [Source:HGNC Symbol;Acc:26160]	-0.740475	0.00357683	0.025022
ENSG00000182093	262	267	301	165	171	162	WRB	tryptophan rich basic protein [Source:HGNC Symbol;Acc:12790]	-0.739501	3.15e-10	8.95e-09
ENSG00000156374	154	127	149	101	107	78	PCGF6	polycomb group ring finger 6 [Source:HGNC Symbol;Acc:21156]	-0.738724	0.00493098	0.0325139
ENSG00000169499	361	339	371	236	254	191	PLEKHA2	pleckstrin homology domain containing, family A (phosphoinositide binding specific) member 2 [Source:HGNC Symbol;Acc:14336]	-0.734246	5.09e-07	9.79e-06
ENSG00000083093	800	780	724	453	468	473	PALB2	partner and localizer of BRCA2 [Source:HGNC Symbol;Acc:26144]	-0.734231	6.81e-07	1.27e-05
ENSG00000122512	510	475	519	305	309	300	PMS2	PMS2 postmeiotic segregation increased 2 (S. cerevisiae) [Source:HGNC Symbol;Acc:9122]	-0.733536	4.36e-16	1.93e-14
ENSG00000168040	772	830	878	470	518	495	FADD	Fas (TNFRSF6)-associated via death domain [Source:HGNC Symbol;Acc:3573]	-0.732884	4.14e-07	8.09e-06
ENSG00000147130	427	454	417	247	266	261	ZMYM3	zinc finger, MYM-type 3 [Source:HGNC Symbol;Acc:13054]	-0.732443	1.31e-09	3.48e-08
ENSG00000168876	357	350	368	228	209	225	ANKRD49	ankyrin repeat domain 49 [Source:HGNC Symbol;Acc:25970]	-0.73199	0.000100829	0.00121276
ENSG00000197933	304	315	321	169	194	203	ZNF823	zinc finger protein 823 [Source:HGNC Symbol;Acc:30936]	-0.731511	0.00214543	0.0164856
ENSG00000049130	5610	5658	5961	3856	4080	3358	KITLG	KIT ligand [Source:HGNC Symbol;Acc:6343]	-0.730492	0.00525275	0.0341835
ENSG00000122481	134	144	155	96	91	86	RWDD3	RWD domain containing 3 [Source:HGNC Symbol;Acc:21393]	-0.72987	0.000286646	0.00304044
ENSG00000166188	55	60	66	26	45	36	ZNF319	zinc finger protein 319 [Source:HGNC Symbol;Acc:13644]	-0.727948	0.00113865	0.00977813
ENSG00000139531	236	178	199	120	117	128	SUOX	sulfite oxidase [Source:HGNC Symbol;Acc:11460]	-0.72792	7.98e-07	1.46e-05
ENSG00000272414	235	220	192	120	152	127		uncharacterized protein LOC100631383 [Source:RefSeq peptide;Acc:NP_001229868]	-0.727264	1.39e-05	0.000205984
ENSG00000177873	133	143	135	83	90	71	ZNF619	zinc finger protein 619 [Source:HGNC Symbol;Acc:26910]	-0.726994	5.72e-05	0.000725459
ENSG00000215717	616	616	599	368	397	377	TMEM167B	transmembrane protein 167B [Source:HGNC Symbol;Acc:30187]	-0.726361	1.79e-05	0.00025939
ENSG00000134508	1406	1296	1409	828	834	802	CABLES1	Cdk5 and Abl enzyme substrate 1 [Source:HGNC Symbol;Acc:25097]	-0.726058	7.72e-16	3.39e-14
ENSG00000197024	738	711	613	418	446	402	ZNF398	zinc finger protein 398 [Source:HGNC Symbol;Acc:18373]	-0.725638	4.71e-09	1.18e-07
ENSG00000205213	1811	1753	1820	1151	1186	1036	LGR4	leucine-rich repeat containing G protein-coupled receptor 4 [Source:HGNC Symbol;Acc:13299]	-0.724274	4.08e-05	0.000538525
ENSG00000137075	243	309	318	186	180	181	RNF38	ring finger protein 38 [Source:HGNC Symbol;Acc:18052]	-0.723759	0.000815818	0.00738425
ENSG00000225973	145	139	156	89	102	84			-0.722481	1.25e-05	0.000187929
ENSG00000103199	139	158	143	90	77	90	ZNF500	zinc finger protein 500 [Source:HGNC Symbol;Acc:23716]	-0.722425	9.25e-05	0.00111963
ENSG00000232637	104	88	77	73	50	38			-0.720381	0.00112791	0.00970349
ENSG00000224287	469	435	437	266	297	271	MSL3P1	male-specific lethal 3 homolog (Drosophila) pseudogene 1 [Source:HGNC Symbol;Acc:17837]	-0.719974	9.33e-09	2.25e-07
ENSG00000124279	661	607	608	384	431	386	FASTKD3	FAST kinase domains 3 [Source:HGNC Symbol;Acc:28758]	-0.719471	2.91e-05	0.000400966
ENSG00000168061	295	333	363	168	202	227	SAC3D1	SAC3 domain containing 1 [Source:HGNC Symbol;Acc:30179]	-0.717124	0.000336595	0.0034844
ENSG00000181827	187	247	252	136	146	143	RFX7	regulatory factor X, 7 [Source:HGNC Symbol;Acc:25777]	-0.717013	0.00217887	0.0167044
ENSG00000204237	159	203	214	109	127	115	OXLD1	oxidoreductase-like domain containing 1 [Source:HGNC Symbol;Acc:27901]	-0.716246	0.000298679	0.00314693
ENSG00000184860	446	438	414	249	247	280	SDR42E1	short chain dehydrogenase/reductase family 42E, member 1 [Source:HGNC Symbol;Acc:29834]	-0.715794	8.61e-06	0.000133737
ENSG00000162396	221	220	224	129	134	133	PARS2	prolyl-tRNA synthetase 2, mitochondrial (putative) [Source:HGNC Symbol;Acc:30563]	-0.714557	2.87e-08	6.59e-07
ENSG00000198093	72	62	62	46	25	41	ZNF649	zinc finger protein 649 [Source:HGNC Symbol;Acc:25741]	-0.714444	0.00205052	0.015869
ENSG00000138617	161	178	172	110	85	111	PARP16	poly (ADP-ribose) polymerase family, member 16 [Source:HGNC Symbol;Acc:26040]	-0.714413	8.25e-08	1.75e-06
ENSG00000152133	474	437	446	273	342	248	GPATCH11	G patch domain containing 11 [Source:HGNC Symbol;Acc:26768]	-0.714308	3.46e-05	0.000467866
ENSG00000165376	1528	1431	1436	825	995	893	CLDN2	claudin 2 [Source:HGNC Symbol;Acc:2041]	-0.713629	1.08e-07	2.27e-06
ENSG00000155868	291	285	334	196	193	191	MED7	mediator complex subunit 7 [Source:HGNC Symbol;Acc:2378]	-0.712529	0.000594237	0.0056569
ENSG00000180423	193	179	229	131	108	118	HARBI1	harbinger transposase derived 1 [Source:HGNC Symbol;Acc:26522]	-0.712329	0.000140166	0.00161941
ENSG00000078043	136	174	192	95	119	101	PIAS2	protein inhibitor of activated STAT, 2 [Source:HGNC Symbol;Acc:17311]	-0.711847	0.00193046	0.0151181
ENSG00000112029	1023	961	996	643	616	615	FBXO5	F-box protein 5 [Source:HGNC Symbol;Acc:13584]	-0.710816	0.00407488	0.0279589
ENSG00000174928	52	45	40	28	28	33	C3orf33	chromosome 3 open reading frame 33 [Source:HGNC Symbol;Acc:26434]	-0.709628	0.00583546	0.0371462
ENSG00000182489	118	90	109	63	64	68	XKRX	XK, Kell blood group complex subunit-related, X-linked [Source:HGNC Symbol;Acc:29845]	-0.708757	0.00183025	0.0145254
ENSG00000119401	604	625	598	376	359	374	TRIM32	tripartite motif containing 32 [Source:HGNC Symbol;Acc:16380]	-0.706414	1.01e-18	5.27e-17
ENSG00000172458	155	164	201	125	121	108	IL17D	interleukin 17D [Source:HGNC Symbol;Acc:5984]	-0.706049	0.000877971	0.00785653
ENSG00000117625	334	301	279	213	185	170	RCOR3	REST corepressor 3 [Source:HGNC Symbol;Acc:25594]	-0.705379	1.84e-05	0.000265182
ENSG00000169607	582	553	499	313	354	361	CKAP2L	cytoskeleton associated protein 2-like [Source:HGNC Symbol;Acc:26877]	-0.705316	0.000460803	0.00454981
ENSG00000198039	241	235	226	143	142	149	ZNF273	zinc finger protein 273 [Source:HGNC Symbol;Acc:13067]	-0.70379	2.42e-05	0.000339655
ENSG00000120334	555	550	595	350	369	356	CENPL	centromere protein L [Source:HGNC Symbol;Acc:17879]	-0.703171	4.38e-08	9.72e-07
ENSG00000169598	184	191	160	100	140	99	DFFB	DNA fragmentation factor, 40kDa, beta polypeptide (caspase-activated DNase) [Source:HGNC Symbol;Acc:2773]	-0.703014	1.73e-05	0.000251518
ENSG00000246082	171	162	192	108	101	107	NUDT16P1	nudix (nucleoside diphosphate linked moiety X)-type motif 16 pseudogene 1 [Source:HGNC Symbol;Acc:27189]	-0.702457	2.29e-05	0.000322752
ENSG00000152382	402	357	434	241	280	241	TADA1	transcriptional adaptor 1 [Source:HGNC Symbol;Acc:30631]	-0.701967	1.18e-08	2.84e-07
ENSG00000163516	379	375	353	201	245	228	ANKZF1	ankyrin repeat and zinc finger domain containing 1 [Source:HGNC Symbol;Acc:25527]	-0.700615	2.45e-09	6.37e-08
ENSG00000173218	1862	1884	1956	1138	1322	1162	VANGL1	VANGL planar cell polarity protein 1 [Source:HGNC Symbol;Acc:15512]	-0.699926	3.34e-23	2.16e-21
ENSG00000236618	53	57	54	33	28	33	PITPNA-AS1	PITPNA antisense RNA 1 [Source:HGNC Symbol;Acc:44116]	-0.69804	0.00738705	0.045142
ENSG00000113494	67	67	80	48	57	41	PRLR	prolactin receptor [Source:HGNC Symbol;Acc:9446]	-0.697754	0.00724073	0.0443623
ENSG00000135828	244	210	206	135	143	124	RNASEL	ribonuclease L (2',5'-oligoisoadenylate synthetase-dependent) [Source:HGNC Symbol;Acc:10050]	-0.697704	1.8e-05	0.00025987
ENSG00000253313	170	152	186	107	101	100	C1orf210	chromosome 1 open reading frame 210 [Source:HGNC Symbol;Acc:28755]	-0.696371	6.85e-05	0.000855048
ENSG00000145103	132	140	150	81	81	90	ILDR1	immunoglobulin-like domain containing receptor 1 [Source:HGNC Symbol;Acc:28741]	-0.695672	0.000111332	0.00131899
ENSG00000189120	367	328	314	220	200	186	SP6	Sp6 transcription factor [Source:HGNC Symbol;Acc:14530]	-0.692965	2.28e-07	4.6e-06
ENSG00000164125	852	862	933	597	649	524	FAM198B	family with sequence similarity 198, member B [Source:HGNC Symbol;Acc:25312]	-0.691997	2.07e-07	4.2e-06
ENSG00000179240	64	78	70	46	37	51		Homo sapiens putative uncharacterized protein FLJ37770-like (LOC100506127), mRNA. [Source:RefSeq mRNA;Acc:NM_001282456]	-0.691143	0.0015459	0.012596
ENSG00000197037	398	454	393	237	251	276	ZSCAN25	zinc finger and SCAN domain containing 25 [Source:HGNC Symbol;Acc:21961]	-0.691134	2.27e-11	7.21e-10
ENSG00000198105	212	197	235	140	123	136	ZNF248	zinc finger protein 248 [Source:HGNC Symbol;Acc:13041]	-0.690908	0.002061	0.0159361
ENSG00000198824	114	134	100	65	69	84	CHAMP1	chromosome alignment maintaining phosphoprotein 1 [Source:HGNC Symbol;Acc:20311]	-0.689766	0.000218158	0.0023972
ENSG00000260117	114	134	100	65	69	84	CHAMP1	chromosome alignment maintaining phosphoprotein 1 [Source:HGNC Symbol;Acc:20311]	-0.689766	0.000218158	0.0023972
ENSG00000167637	265	307	320	171	220	187	ZNF283	zinc finger protein 283 [Source:HGNC Symbol;Acc:13077]	-0.688991	0.000375534	0.00382891
ENSG00000183309	409	302	257	192	247	163	ZNF623	zinc finger protein 623 [Source:HGNC Symbol;Acc:29084]	-0.688676	0.000393413	0.0039876
ENSG00000109381	1203	1152	1162	739	762	689	ELF2	E74-like factor 2 (ets domain transcription factor) [Source:HGNC Symbol;Acc:3317]	-0.688039	9e-07	1.64e-05
ENSG00000140987	340	300	305	172	212	201	ZSCAN32	zinc finger and SCAN domain containing 32 [Source:HGNC Symbol;Acc:20812]	-0.687713	2.28e-08	5.3e-07
ENSG00000168970	85	99	102	57	52	62	JMJD7-PLA2G4B	JMJD7-PLA2G4B readthrough [Source:HGNC Symbol;Acc:34449]	-0.687529	0.000125695	0.00147077
ENSG00000249042	120	122	142	79	90	77			-0.686001	0.000754131	0.00688565
ENSG00000154957	64	80	80	51	45	43	ZNF18	zinc finger protein 18 [Source:HGNC Symbol;Acc:12969]	-0.685979	0.000772008	0.00703798
ENSG00000177946	197	208	193	123	121	138	CENPBD1	CENPB DNA-binding domains containing 1 [Source:HGNC Symbol;Acc:28272]	-0.685761	1.28e-06	2.3e-05
ENSG00000196670	814	828	718	464	506	500	ZFP62	ZFP62 zinc finger protein [Source:HGNC Symbol;Acc:23241]	-0.685432	0.000837178	0.00754855
ENSG00000172728	205	209	205	120	128	130	FUT10	fucosyltransferase 10 (alpha (1,3) fucosyltransferase) [Source:HGNC Symbol;Acc:19234]	-0.680843	1.48e-05	0.000218575
ENSG00000188785	215	194	241	144	129	129	ZNF548	zinc finger protein 548 [Source:HGNC Symbol;Acc:26561]	-0.680622	6.2e-06	0.000100108
ENSG00000238105	91	91	77	43	49	65	GOLGA2P5	golgin A2 pseudogene 5 [Source:HGNC Symbol;Acc:25315]	-0.679745	0.000612362	0.005809
ENSG00000169955	103	126	125	78	64	78	ZNF747	zinc finger protein 747 [Source:HGNC Symbol;Acc:28350]	-0.678507	0.000420522	0.00422171
ENSG00000118369	77	70	80	41	44	52	USP35	ubiquitin specific peptidase 35 [Source:HGNC Symbol;Acc:20061]	-0.678453	0.00255043	0.0190819
ENSG00000121858	209	202	225	125	150	139	TNFSF10	tumor necrosis factor (ligand) superfamily, member 10 [Source:HGNC Symbol;Acc:11925]	-0.678243	0.000216767	0.00238608
ENSG00000180964	265	237	241	154	191	134	TCEAL8	transcription elongation factor A (SII)-like 8 [Source:HGNC Symbol;Acc:28683]	-0.677579	0.00255431	0.019093
ENSG00000144659	446	445	441	266	274	285	SLC25A38	solute carrier family 25, member 38 [Source:HGNC Symbol;Acc:26054]	-0.677326	8.9e-09	2.16e-07
ENSG00000205423	224	217	234	153	158	151	CNEP1R1	CTD nuclear envelope phosphatase 1 regulatory subunit 1 [Source:HGNC Symbol;Acc:26759]	-0.676683	0.00150563	0.0123582
ENSG00000125449	325	361	401	217	220	238	ARMC7	armadillo repeat containing 7 [Source:HGNC Symbol;Acc:26168]	-0.676415	1.72e-05	0.000250012
ENSG00000132801	157	155	158	96	106	96	ZSWIM3	zinc finger, SWIM-type containing 3 [Source:HGNC Symbol;Acc:16157]	-0.675814	2.69e-06	4.61e-05
ENSG00000112039	309	251	252	171	171	156	FANCE	Fanconi anemia, complementation group E [Source:HGNC Symbol;Acc:3586]	-0.674132	3.81e-05	0.000508533
ENSG00000092964	2089	2134	2224	1534	1615	1123	DPYSL2	dihydropyrimidinase-like 2 [Source:HGNC Symbol;Acc:3014]	-0.673963	0.000704141	0.00649745
ENSG00000095539	206	241	229	127	148	166	SEMA4G	sema domain, immunoglobulin domain (Ig), transmembrane domain (TM) and short cytoplasmic domain, (semaphorin) 4G [Source:HGNC Symbol;Acc:10735]	-0.673767	4.16e-05	0.00054886
ENSG00000135392	1161	1267	1047	510	658	995	DNAJC14	DnaJ (Hsp40) homolog, subfamily C, member 14 [Source:HGNC Symbol;Acc:24581]	-0.672364	0.00576556	0.0367506
ENSG00000085840	1128	1118	1118	665	738	706	ORC1	origin recognition complex, subunit 1 [Source:HGNC Symbol;Acc:8487]	-0.672318	5.32e-14	2.05e-12
ENSG00000121486	267	277	324	184	208	184	TRMT1L	tRNA methyltransferase 1 homolog (S. cerevisiae)-like [Source:HGNC Symbol;Acc:16782]	-0.6718	0.000458524	0.00453355
ENSG00000248594	93	76	57	55	48	43			-0.671125	0.0037092	0.0257861
ENSG00000186205	403	365	385	252	279	224	2018-03-01	mitochondrial amidoxime reducing component 1 [Source:HGNC Symbol;Acc:26189]	-0.668466	1.42e-11	4.63e-10
ENSG00000168813	790	836	777	501	544	500	ZNF507	zinc finger protein 507 [Source:HGNC Symbol;Acc:23783]	-0.66829	2.42e-05	0.000339593
ENSG00000221843	59	76	66	42	49	36	C2orf16	chromosome 2 open reading frame 16 [Source:HGNC Symbol;Acc:25275]	-0.668227	0.00230816	0.0175184
ENSG00000170903	814	698	738	506	499	461	MSANTD4	Myb/SANT-like DNA-binding domain containing 4 with coiled-coils [Source:HGNC Symbol;Acc:29383]	-0.667814	2.24e-05	0.000315289
ENSG00000183814	771	669	702	539	463	447	LIN9	lin-9 homolog (C. elegans) [Source:HGNC Symbol;Acc:30830]	-0.667655	0.00414367	0.0282773
ENSG00000243667	381	376	345	218	221	261	WDR92	WD repeat domain 92 [Source:HGNC Symbol;Acc:25176]	-0.666934	1.72e-09	4.51e-08
ENSG00000139292	579	512	513	365	336	328	LGR5	leucine-rich repeat containing G protein-coupled receptor 5 [Source:HGNC Symbol;Acc:4504]	-0.666381	6.63e-08	1.43e-06
ENSG00000109674	298	274	277	181	216	177	NEIL3	nei endonuclease VIII-like 3 (E. coli) [Source:HGNC Symbol;Acc:24573]	-0.664525	0.000629923	0.00595472
ENSG00000186470	190	175	195	98	127	129	BTN3A2	butyrophilin, subfamily 3, member A2 [Source:HGNC Symbol;Acc:1139]	-0.663773	1.2e-06	2.16e-05
ENSG00000127955	454	485	517	319	376	287	GNAI1	guanine nucleotide binding protein (G protein), alpha inhibiting activity polypeptide 1 [Source:HGNC Symbol;Acc:4384]	-0.663374	0.00248296	0.0186581
ENSG00000151135	483	546	646	384	384	353	C12orf23	chromosome 12 open reading frame 23 [Source:HGNC Symbol;Acc:28281]	-0.663296	0.00275145	0.0202657
ENSG00000169019	396	379	424	265	311	239	COMMD8	COMM domain containing 8 [Source:HGNC Symbol;Acc:26036]	-0.663103	0.00701156	0.0431817
ENSG00000015532	307	330	314	187	187	207	XYLT2	xylosyltransferase II [Source:HGNC Symbol;Acc:15517]	-0.662623	6.93e-06	0.000110153
ENSG00000198185	192	184	169	112	112	126	ZNF334	zinc finger protein 334 [Source:HGNC Symbol;Acc:15806]	-0.661037	0.000471498	0.00464244
ENSG00000186665	222	208	215	128	154	146	C17orf58	chromosome 17 open reading frame 58 [Source:HGNC Symbol;Acc:27568]	-0.658837	2.5e-08	5.77e-07
ENSG00000263085	222	208	215	128	154	146	C17orf58	chromosome 17 open reading frame 58 [Source:HGNC Symbol;Acc:27568]	-0.658837	2.5e-08	5.77e-07
ENSG00000141542	150	151	156	105	107	93	RAB40B	RAB40B, member RAS oncogene family [Source:HGNC Symbol;Acc:18284]	-0.658303	0.000103689	0.00124298
ENSG00000171425	328	372	377	230	216	232	ZNF581	zinc finger protein 581 [Source:HGNC Symbol;Acc:25017]	-0.657927	0.000149902	0.00171586
ENSG00000112874	375	340	388	228	256	226	NUDT12	nudix (nucleoside diphosphate linked moiety X)-type motif 12 [Source:HGNC Symbol;Acc:18826]	-0.657424	0.0079282	0.0478197
ENSG00000105136	276	282	265	177	158	170	ZNF419	zinc finger protein 419 [Source:HGNC Symbol;Acc:20648]	-0.656724	6.62e-07	1.24e-05
ENSG00000101945	720	707	715	420	453	475	SUV39H1	suppressor of variegation 3-9 homolog 1 (Drosophila) [Source:HGNC Symbol;Acc:11479]	-0.655226	1.69e-10	4.92e-09
ENSG00000136379	753	711	701	449	510	487	ABHD17C	abhydrolase domain containing 17C [Source:HGNC Symbol;Acc:26925]	-0.654806	3.96e-10	1.11e-08
ENSG00000182504	632	650	679	456	471	393	CEP97	centrosomal protein 97kDa [Source:HGNC Symbol;Acc:26244]	-0.654762	3.52e-05	0.000475173
ENSG00000137871	755	670	706	489	493	443	ZNF280D	zinc finger protein 280D [Source:HGNC Symbol;Acc:25953]	-0.654471	0.00554729	0.0357199
ENSG00000143457	736	576	699	417	454	428	GOLPH3L	golgi phosphoprotein 3-like [Source:HGNC Symbol;Acc:24882]	-0.654326	0.000143117	0.00164916
ENSG00000198056	519	518	433	311	298	316	PRIM1	primase, DNA, polypeptide 1 (49kDa) [Source:HGNC Symbol;Acc:9369]	-0.654259	0.00495751	0.0326434
ENSG00000182993	57	51	49	33	33	36	C12orf60	chromosome 12 open reading frame 60 [Source:HGNC Symbol;Acc:28726]	-0.652783	0.00761057	0.0461865
ENSG00000197153	2703	2689	2946	1582	1733	1843	HIST1H3J	histone cluster 1, H3j [Source:HGNC Symbol;Acc:4774]	-0.65268	4e-08	8.93e-07
ENSG00000235106	157	206	198	117	124	111	LINC00094	long intergenic non-protein coding RNA 94 [Source:HGNC Symbol;Acc:24742]	-0.650676	9.42e-05	0.00113959
ENSG00000124104	112	109	105	69	67	69	SNX21	sorting nexin family member 21 [Source:HGNC Symbol;Acc:16154]	-0.650558	0.000244234	0.00264538
ENSG00000115827	381	350	390	214	285	251	DCAF17	DDB1 and CUL4 associated factor 17 [Source:HGNC Symbol;Acc:25784]	-0.649452	0.00488169	0.0322671
ENSG00000171224	68	75	73	40	45	55	C10orf35	chromosome 10 open reading frame 35 [Source:HGNC Symbol;Acc:23519]	-0.648689	0.0055892	0.0359165
ENSG00000263044	182	189	166	109	136	109	NSUN5P1	NOP2/Sun domain family, member 5 pseudogene 1 [Source:HGNC Symbol;Acc:19146]	-0.648196	0.000389882	0.00395392
ENSG00000068097	313	278	295	175	180	205	HEATR6	HEAT repeat containing 6 [Source:HGNC Symbol;Acc:24076]	-0.647025	5.42e-08	1.19e-06
ENSG00000187792	55	59	42	28	35	35	ZNF70	zinc finger protein 70 [Source:HGNC Symbol;Acc:13140]	-0.645541	0.00507662	0.0332428
ENSG00000174446	718	676	639	452	429	414	SNAPC5	small nuclear RNA activating complex, polypeptide 5, 19kDa [Source:HGNC Symbol;Acc:15484]	-0.64554	1.28e-09	3.42e-08
ENSG00000111671	124	150	139	82	73	100	SPSB2	splA/ryanodine receptor domain and SOCS box containing 2 [Source:HGNC Symbol;Acc:29522]	-0.644541	0.000115653	0.00136529
ENSG00000088305	88	123	119	65	61	82	DNMT3B	DNA (cytosine-5-)-methyltransferase 3 beta [Source:HGNC Symbol;Acc:2979]	-0.642049	0.000108174	0.00128964
ENSG00000164815	836	788	857	560	607	539	ORC5	origin recognition complex, subunit 5 [Source:HGNC Symbol;Acc:8491]	-0.640715	0.000243217	0.00263587
ENSG00000136169	277	241	208	167	166	144	SETDB2	SET domain, bifurcated 2 [Source:HGNC Symbol;Acc:20263]	-0.640311	0.00542487	0.0350986
ENSG00000179021	239	188	241	153	160	143	C3orf38	chromosome 3 open reading frame 38 [Source:HGNC Symbol;Acc:28384]	-0.639364	0.00296877	0.0215151
ENSG00000003989	641	547	593	407	417	372	SLC7A2	solute carrier family 7 (cationic amino acid transporter, y+ system), member 2 [Source:HGNC Symbol;Acc:11060]	-0.637054	1.5e-06	2.66e-05
ENSG00000172731	467	444	423	261	261	329	LRRC20	leucine rich repeat containing 20 [Source:HGNC Symbol;Acc:23421]	-0.634027	2.97e-05	0.000409466
ENSG00000016402	167	169	173	129	101	93	IL20RA	interleukin 20 receptor, alpha [Source:HGNC Symbol;Acc:6003]	-0.633792	0.000379321	0.00385922
ENSG00000163026	547	516	519	328	354	357	C2orf44	chromosome 2 open reading frame 44 [Source:HGNC Symbol;Acc:26157]	-0.633563	2.72e-06	4.65e-05
ENSG00000187257	1058	1015	1056	709	768	640	RSBN1L	round spermatid basic protein 1-like [Source:HGNC Symbol;Acc:24765]	-0.632271	0.000186097	0.0020799
ENSG00000135045	176	207	201	135	143	116	C9orf40	chromosome 9 open reading frame 40 [Source:HGNC Symbol;Acc:23433]	-0.631268	4.45e-06	7.33e-05
ENSG00000183578	145	159	162	106	99	92	TNFAIP8L3	tumor necrosis factor, alpha-induced protein 8-like 3 [Source:HGNC Symbol;Acc:20620]	-0.630717	0.0023628	0.0178758
ENSG00000007968	211	200	193	121	121	141	E2F2	E2F transcription factor 2 [Source:HGNC Symbol;Acc:3114]	-0.62987	9.04e-06	0.000139648
ENSG00000186666	179	157	142	86	127	104	BCDIN3D	BCDIN3 domain containing [Source:HGNC Symbol;Acc:27050]	-0.629825	0.0005013	0.00490782
ENSG00000124635	2472	2670	2991	1528	1834	1837	HIST1H2BJ	histone cluster 1, H2bj [Source:HGNC Symbol;Acc:4761]	-0.628703	7.9e-06	0.000124438
ENSG00000185670	374	363	342	210	251	231	ZBTB3	zinc finger and BTB domain containing 3 [Source:HGNC Symbol;Acc:22918]	-0.627584	3.77e-07	7.39e-06
ENSG00000127084	187	199	181	113	142	123	FGD3	FYVE, RhoGEF and PH domain containing 3 [Source:HGNC Symbol;Acc:16027]	-0.627538	2.7e-05	0.000375059
ENSG00000140382	918	870	1007	626	629	584	HMG20A	high mobility group 20A [Source:HGNC Symbol;Acc:5001]	-0.627528	4.2e-14	1.63e-12
ENSG00000158882	203	221	205	128	151	129	TOMM40L	translocase of outer mitochondrial membrane 40 homolog (yeast)-like [Source:HGNC Symbol;Acc:25756]	-0.627191	7.11e-06	0.00011283
ENSG00000158156	64	80	83	35	52	57	XKR8	XK, Kell blood group complex subunit-related family, member 8 [Source:HGNC Symbol;Acc:25508]	-0.626218	0.0017364	0.0138678
ENSG00000144306	217	204	215	142	149	140	SCRN3	secernin 3 [Source:HGNC Symbol;Acc:30382]	-0.626129	0.00512812	0.033499
ENSG00000111653	404	365	374	227	275	238	ING4	inhibitor of growth family, member 4 [Source:HGNC Symbol;Acc:19423]	-0.62588	7.18e-07	1.33e-05
ENSG00000164649	2045	1955	1950	1281	1242	1330	CDCA7L	cell division cycle associated 7-like [Source:HGNC Symbol;Acc:30777]	-0.625385	2.95e-16	1.33e-14
ENSG00000178700	301	246	251	160	182	179	DHFRL1	dihydrofolate reductase-like 1 [Source:HGNC Symbol;Acc:27309]	-0.625323	0.00144062	0.0118954
ENSG00000115163	535	518	546	354	376	313	CENPA	centromere protein A [Source:HGNC Symbol;Acc:1851]	-0.624546	1.03e-10	3.1e-09
ENSG00000188428	370	362	368	251	232	248	BLOC1S5	biogenesis of lysosomal organelles complex-1, subunit 5, muted [Source:HGNC Symbol;Acc:18561]	-0.622038	0.000397965	0.00402942
ENSG00000198863	697	654	576	363	456	424	RUNDC1	RUN domain containing 1 [Source:HGNC Symbol;Acc:25418]	-0.621011	3.29e-08	7.43e-07
ENSG00000134297	118	141	126	83	79	80	PLEKHA8P1	pleckstrin homology domain containing, family A member 8 pseudogene 1 [Source:HGNC Symbol;Acc:30222]	-0.620908	0.00155459	0.0126558
ENSG00000163348	918	925	989	585	668	588	PYGO2	pygopus family PHD finger 2 [Source:HGNC Symbol;Acc:30257]	-0.62034	5.04e-12	1.69e-10
ENSG00000164751	850	806	913	585	615	547	PEX2	peroxisomal biogenesis factor 2 [Source:HGNC Symbol;Acc:9717]	-0.619137	6.42e-08	1.39e-06
ENSG00000090612	466	458	529	350	353	302	ZNF268	zinc finger protein 268 [Source:HGNC Symbol;Acc:13061]	-0.618904	0.00731514	0.0447459
ENSG00000070087	3725	3643	4075	2639	2865	2376	PFN2	profilin 2 [Source:HGNC Symbol;Acc:8882]	-0.618357	2.01e-06	3.52e-05
ENSG00000182572	1532	1492	1477	824	976	1025	HIST1H3I	histone cluster 1, H3i [Source:HGNC Symbol;Acc:4771]	-0.618162	0.000238605	0.00259331
ENSG00000164109	2610	2419	2750	1858	1870	1661	MAD2L1	MAD2 mitotic arrest deficient-like 1 (yeast) [Source:HGNC Symbol;Acc:6763]	-0.617628	0.0001	0.00120351
ENSG00000160062	172	124	135	98	109	85	ZBTB8A	zinc finger and BTB domain containing 8A [Source:HGNC Symbol;Acc:24172]	-0.617621	0.00350978	0.024708
ENSG00000242779	397	386	395	295	276	242	ZNF702P	zinc finger protein 702, pseudogene [Source:HGNC Symbol;Acc:25775]	-0.6173	0.00646847	0.0404285
ENSG00000091947	709	644	798	441	500	462	TMEM101	transmembrane protein 101 [Source:HGNC Symbol;Acc:28653]	-0.617114	5.47e-08	1.19e-06
ENSG00000197162	149	112	148	81	92	88	ZNF785	zinc finger protein 785 [Source:HGNC Symbol;Acc:26496]	-0.615489	0.00501239	0.0329375
ENSG00000151445	357	291	287	201	228	193	VIPAS39	VPS33B interacting protein, apical-basolateral polarity regulator, spe-39 homolog [Source:HGNC Symbol;Acc:20347]	-0.615338	3.01e-07	5.96e-06
ENSG00000103021	64	62	56	48	31	41	CCDC113	coiled-coil domain containing 113 [Source:HGNC Symbol;Acc:25002]	-0.615027	0.00285425	0.0208366
ENSG00000155858	503	503	499	348	369	328	LSM11	LSM11, U7 small nuclear RNA associated [Source:HGNC Symbol;Acc:30860]	-0.614789	5.07e-08	1.12e-06
ENSG00000114423	111	118	119	64	76	82	CBLB	Cbl proto-oncogene B, E3 ubiquitin protein ligase [Source:HGNC Symbol;Acc:1542]	-0.613325	0.000867221	0.00778169
ENSG00000167562	214	185	168	133	110	129	ZNF701	zinc finger protein 701 [Source:HGNC Symbol;Acc:25597]	-0.613169	0.00549256	0.0354518
ENSG00000165388	136	137	110	79	92	85	ZNF488	zinc finger protein 488 [Source:HGNC Symbol;Acc:23535]	-0.613021	0.00223281	0.0170489
ENSG00000147789	541	530	434	440	334	235	ZNF7	zinc finger protein 7 [Source:HGNC Symbol;Acc:13139]	-0.612728	0.00536519	0.0348314
ENSG00000148660	1340	1313	1354	837	993	836	CAMK2G	calcium/calmodulin-dependent protein kinase II gamma [Source:HGNC Symbol;Acc:1463]	-0.612308	2.53e-13	9.28e-12
ENSG00000155324	137	126	163	93	106	95	GRAMD3	GRAM domain containing 3 [Source:HGNC Symbol;Acc:24911]	-0.611151	0.000231308	0.00251846
ENSG00000251369	114	102	120	86	66	67	ZNF550	zinc finger protein 550 [Source:HGNC Symbol;Acc:28643]	-0.610929	0.0034383	0.024277
ENSG00000132623	510	471	493	344	330	306	ANKEF1	ankyrin repeat and EF-hand domain containing 1 [Source:HGNC Symbol;Acc:15803]	-0.610922	6.7e-07	1.25e-05
ENSG00000140280	297	278	269	193	196	195	LYSMD2	LysM, putative peptidoglycan-binding, domain containing 2 [Source:HGNC Symbol;Acc:28571]	-0.61069	4.5e-05	0.00059025
ENSG00000173548	620	608	539	358	398	373	SNX33	sorting nexin 33 [Source:HGNC Symbol;Acc:28468]	-0.610011	3.16e-07	6.24e-06
ENSG00000152443	966	961	908	636	628	623	ZNF776	zinc finger protein 776 [Source:HGNC Symbol;Acc:26765]	-0.609783	0.000301614	0.00316904
ENSG00000172113	410	363	398	265	245	249	NME6	NME/NM23 nucleoside diphosphate kinase 6 [Source:HGNC Symbol;Acc:20567]	-0.608919	8.03e-07	1.47e-05
ENSG00000165029	222	195	244	160	161	121	ABCA1	ATP-binding cassette, sub-family A (ABC1), member 1 [Source:HGNC Symbol;Acc:29]	-0.607368	1.63e-05	0.000237568
ENSG00000168792	686	643	685	432	457	429	ABHD15	abhydrolase domain containing 15 [Source:HGNC Symbol;Acc:26971]	-0.607206	8.19e-09	2e-07
ENSG00000100196	571	468	464	294	370	352	KDELR3	KDEL (Lys-Asp-Glu-Leu) endoplasmic reticulum protein retention receptor 3 [Source:HGNC Symbol;Acc:6306]	-0.606883	2.86e-06	4.85e-05
ENSG00000138735	141	136	166	110	103	93	PDE5A	phosphodiesterase 5A, cGMP-specific [Source:HGNC Symbol;Acc:8784]	-0.606882	0.00612785	0.0386302
ENSG00000138640	439	379	414	261	325	266	FAM13A	family with sequence similarity 13, member A [Source:HGNC Symbol;Acc:19367]	-0.606507	3.2e-08	7.24e-07
ENSG00000134222	583	543	547	330	401	357	PSRC1	proline/serine-rich coiled-coil 1 [Source:HGNC Symbol;Acc:24472]	-0.605887	4e-06	6.65e-05
ENSG00000111911	277	281	291	208	213	167	HINT3	histidine triad nucleotide binding protein 3 [Source:HGNC Symbol;Acc:18468]	-0.605844	0.00133812	0.0111769
ENSG00000205659	292	302	307	195	218	193	LIN52	lin-52 homolog (C. elegans) [Source:HGNC Symbol;Acc:19856]	-0.604467	2.59e-05	0.000360639
ENSG00000143315	384	358	414	250	281	253	PIGM	phosphatidylinositol glycan anchor biosynthesis, class M [Source:HGNC Symbol;Acc:18858]	-0.604331	1.99e-05	0.000284451
ENSG00000106144	758	788	752	495	541	501	CASP2	caspase 2, apoptosis-related cysteine peptidase [Source:HGNC Symbol;Acc:1503]	-0.603536	1.63e-12	5.65e-11
ENSG00000141428	188	162	176	110	141	116	C18orf21	chromosome 18 open reading frame 21 [Source:HGNC Symbol;Acc:28802]	-0.602755	7.22e-05	0.000897109
ENSG00000164631	759	881	880	623	589	549	ZNF12	zinc finger protein 12 [Source:HGNC Symbol;Acc:12902]	-0.60061	0.00733363	0.0448445
ENSG00000198366	1051	1152	1136	660	731	751	HIST1H3A	histone cluster 1, H3a [Source:HGNC Symbol;Acc:4766]	-0.598366	5.97e-07	1.13e-05
ENSG00000129055	616	593	668	467	465	386	ANAPC13	anaphase promoting complex subunit 13 [Source:HGNC Symbol;Acc:24540]	-0.596984	0.000663096	0.00620944
ENSG00000222011	101	118	119	69	99	63	FAM185A	family with sequence similarity 185, member A [Source:HGNC Symbol;Acc:22412]	-0.596728	0.00586763	0.0372633
ENSG00000198750	108	102	106	96	51	64	GATSL2	GATS protein-like 2 [Source:HGNC Symbol;Acc:37073]	-0.595908	0.00639865	0.0400317
ENSG00000011523	149	148	128	116	82	85	CEP68	centrosomal protein 68kDa [Source:HGNC Symbol;Acc:29076]	-0.595406	0.000206905	0.00228949
ENSG00000256525	62	66	60	41	41	45	POLG2	polymerase (DNA directed), gamma 2, accessory subunit [Source:HGNC Symbol;Acc:9180]	-0.595262	0.00167216	0.0134625
ENSG00000262917	62	66	60	41	41	45	POLG2	polymerase (DNA directed), gamma 2, accessory subunit [Source:HGNC Symbol;Acc:9180]	-0.595262	0.00167216	0.0134625
ENSG00000174796	334	348	373	272	243	211	THAP6	THAP domain containing 6 [Source:HGNC Symbol;Acc:23189]	-0.594863	0.00575486	0.0367318
ENSG00000115525	157	114	113	88	90	91	ST3GAL5	ST3 beta-galactoside alpha-2,3-sialyltransferase 5 [Source:HGNC Symbol;Acc:10872]	-0.594231	0.00119722	0.0101841
ENSG00000140463	290	293	265	181	188	189	BBS4	Bardet-Biedl syndrome 4 [Source:HGNC Symbol;Acc:969]	-0.59213	7.98e-07	1.46e-05
ENSG00000137843	84	95	82	62	61	48	PAK6	p21 protein (Cdc42/Rac)-activated kinase 6 [Source:HGNC Symbol;Acc:16061]	-0.591242	0.00408752	0.0280253
ENSG00000122033	1041	982	943	657	651	668	MTIF3	mitochondrial translational initiation factor 3 [Source:HGNC Symbol;Acc:29788]	-0.590057	3.68e-05	0.000493069
ENSG00000038532	324	468	459	250	338	304	CLEC16A	C-type lectin domain family 16, member A [Source:HGNC Symbol;Acc:29013]	-0.586676	0.00201436	0.0156458
ENSG00000196372	635	624	605	381	446	412	ASB13	ankyrin repeat and SOCS box containing 13 [Source:HGNC Symbol;Acc:19765]	-0.586289	2.81e-06	4.78e-05
ENSG00000177383	605	632	620	445	393	379	MAGEF1	melanoma antigen family F, 1 [Source:HGNC Symbol;Acc:29639]	-0.585733	0.000292147	0.00308515
ENSG00000100490	69	96	89	64	56	52	CDKL1	cyclin-dependent kinase-like 1 (CDC2-related kinase) [Source:HGNC Symbol;Acc:1781]	-0.585531	0.0076116	0.0461865
ENSG00000146410	217	206	236	139	146	173	MTFR2	mitochondrial fission regulator 2 [Source:HGNC Symbol;Acc:21115]	-0.584555	0.00324302	0.0230997
ENSG00000186767	213	187	244	144	137	162	SPIN4	spindlin family, member 4 [Source:HGNC Symbol;Acc:27040]	-0.584209	0.00472942	0.0315361
ENSG00000171970	252	240	239	138	174	184	ZNF57	zinc finger protein 57 [Source:HGNC Symbol;Acc:13125]	-0.583871	0.000131687	0.00153424
ENSG00000189114	228	201	208	151	140	128	BLOC1S3	biogenesis of lysosomal organelles complex-1, subunit 3 [Source:HGNC Symbol;Acc:20914]	-0.583349	0.00038378	0.0038983
ENSG00000135111	533	589	520	361	371	372	TBX3	T-box 3 [Source:HGNC Symbol;Acc:11602]	-0.583192	7.85e-06	0.000123867
ENSG00000196072	866	815	964	605	606	606	BLOC1S2	biogenesis of lysosomal organelles complex-1, subunit 2 [Source:HGNC Symbol;Acc:20984]	-0.582593	0.00199013	0.0154639
ENSG00000198690	852	729	737	530	497	519	FAN1	FANCD2/FANCI-associated nuclease 1 [Source:HGNC Symbol;Acc:29170]	-0.579903	4.5e-08	9.95e-07
ENSG00000104442	1271	1398	1605	1097	1147	855	ARMC1	armadillo repeat containing 1 [Source:HGNC Symbol;Acc:17684]	-0.578851	0.00109457	0.00945106
ENSG00000189180	1312	1241	1141	841	952	806	ZNF33A	zinc finger protein 33A [Source:HGNC Symbol;Acc:13096]	-0.577312	0.00412902	0.0282383
ENSG00000259439	276	245	268	188	160	182			-0.577196	0.000754208	0.00688565
ENSG00000106351	338	333	342	217	242	220	AGFG2	ArfGAP with FG repeats 2 [Source:HGNC Symbol;Acc:5177]	-0.576604	1.96e-05	0.000280799
ENSG00000066654	2054	1986	1910	1418	1449	1284	THUMPD1	THUMP domain containing 1 [Source:HGNC Symbol;Acc:23807]	-0.576257	0.00379079	0.0262377
ENSG00000170439	252	226	248	144	149	169	METTL7B	methyltransferase like 7B [Source:HGNC Symbol;Acc:28276]	-0.575136	0.000133662	0.00155344
ENSG00000214013	159	152	150	93	120	102	GANC	glucosidase, alpha; neutral C [Source:HGNC Symbol;Acc:4139]	-0.574738	0.000110649	0.00131419
ENSG00000112365	500	478	550	333	345	350	ZBTB24	zinc finger and BTB domain containing 24 [Source:HGNC Symbol;Acc:21143]	-0.574409	7.81e-09	1.91e-07
ENSG00000103351	141	118	148	93	84	97	CLUAP1	clusterin associated protein 1 [Source:HGNC Symbol;Acc:19009]	-0.573069	0.000792447	0.0072139
ENSG00000112208	1112	1067	1119	751	804	754	BAG2	BCL2-associated athanogene 2 [Source:HGNC Symbol;Acc:938]	-0.572933	0.00637922	0.0399629
ENSG00000170456	1032	954	990	652	687	698	DENND5B	DENN/MADD domain containing 5B [Source:HGNC Symbol;Acc:28338]	-0.572313	7.9e-08	1.68e-06
ENSG00000127125	730	711	744	509	522	468	PPCS	phosphopantothenoylcysteine synthetase [Source:HGNC Symbol;Acc:25686]	-0.570637	3.17e-05	0.000433605
ENSG00000205138	314	312	328	197	228	206	SDHAF1	succinate dehydrogenase complex assembly factor 1 [Source:HGNC Symbol;Acc:33867]	-0.570597	0.00194406	0.015212
ENSG00000173875	498	454	490	344	346	316	ZNF791	zinc finger protein 791 [Source:HGNC Symbol;Acc:26895]	-0.570292	0.000209681	0.0023188
ENSG00000005812	1417	1361	1473	1031	1161	918	FBXL3	F-box and leucine-rich repeat protein 3 [Source:HGNC Symbol;Acc:13599]	-0.569896	0.000283607	0.00301076
ENSG00000150456	209	184	211	147	167	120	N6AMT2	N-6 adenine-specific DNA methyltransferase 2 (putative) [Source:HGNC Symbol;Acc:27351]	-0.569466	0.00129841	0.0109126
ENSG00000170144	846	1007	997	707	649	651	HNRNPA3	heterogeneous nuclear ribonucleoprotein A3 [Source:HGNC Symbol;Acc:24941]	-0.569089	0.00467333	0.0312391
ENSG00000166938	605	647	603	421	460	395	DIS3L	DIS3 mitotic control homolog (S. cerevisiae)-like [Source:HGNC Symbol;Acc:28698]	-0.567739	1.09e-07	2.29e-06
ENSG00000175155	236	224	206	153	149	150	YPEL2	yippee-like 2 (Drosophila) [Source:HGNC Symbol;Acc:18326]	-0.567542	4.58e-06	7.53e-05
ENSG00000055147	330	296	334	218	217	225	FAM114A2	family with sequence similarity 114, member A2 [Source:HGNC Symbol;Acc:1333]	-0.566578	3.22e-06	5.44e-05
ENSG00000129518	328	307	347	235	220	217	EAPP	E2F-associated phosphoprotein [Source:HGNC Symbol;Acc:19312]	-0.566068	0.00335325	0.0237829
ENSG00000132541	518	522	519	397	390	339	HRSP12	heat-responsive protein 12 [Source:HGNC Symbol;Acc:16897]	-0.565969	0.000583908	0.00557538
ENSG00000142082	157	134	173	95	102	110	SIRT3	sirtuin 3 [Source:HGNC Symbol;Acc:14931]	-0.56569	0.00015683	0.00178545
ENSG00000166912	754	807	715	585	581	499	MTMR10	myotubularin related protein 10 [Source:HGNC Symbol;Acc:25999]	-0.565566	0.0011936	0.0101579
ENSG00000198585	541	527	436	341	318	349	NUDT16	nudix (nucleoside diphosphate linked moiety X)-type motif 16 [Source:HGNC Symbol;Acc:26442]	-0.565515	1.13e-06	2.04e-05
ENSG00000186532	396	362	370	228	298	248	SMYD4	SET and MYND domain containing 4 [Source:HGNC Symbol;Acc:21067]	-0.565044	8.02e-08	1.71e-06
ENSG00000169047	1651	1941	1975	1199	1275	1283	IRS1	insulin receptor substrate 1 [Source:HGNC Symbol;Acc:6125]	-0.564178	1.17e-05	0.000177634
ENSG00000178401	315	281	289	192	224	198	DNAJC22	DnaJ (Hsp40) homolog, subfamily C, member 22 [Source:HGNC Symbol;Acc:25802]	-0.562018	0.000155263	0.00176867
ENSG00000141034	102	97	120	67	75	72	GID4	GID complex subunit 4 [Source:HGNC Symbol;Acc:28453]	-0.561354	0.00147392	0.01214
ENSG00000214765	155	166	163	115	110	103	SEPT7P2	septin 7 pseudogene 2 [Source:HGNC Symbol;Acc:32339]	-0.559507	0.00492232	0.0324907
ENSG00000129282	93	115	102	68	67	70	MRM1	mitochondrial rRNA methyltransferase 1 homolog (S. cerevisiae) [Source:HGNC Symbol;Acc:26202]	-0.559438	0.00220874	0.0168924
ENSG00000262595	93	115	102	68	67	70	MRM1	mitochondrial rRNA methyltransferase 1 homolog (S. cerevisiae) [Source:HGNC Symbol;Acc:26202]	-0.559438	0.00220874	0.0168924
ENSG00000130772	296	321	324	201	212	212	MED18	mediator complex subunit 18 [Source:HGNC Symbol;Acc:25944]	-0.558673	8.52e-06	0.000132972
ENSG00000125352	313	273	272	187	167	209	RNF113A	ring finger protein 113A [Source:HGNC Symbol;Acc:12974]	-0.558302	0.000445245	0.00442767
ENSG00000184661	1025	950	837	607	661	683	CDCA2	cell division cycle associated 2 [Source:HGNC Symbol;Acc:14623]	-0.557948	5.47e-05	0.000699106
ENSG00000113595	334	317	324	227	261	204	TRIM23	tripartite motif containing 23 [Source:HGNC Symbol;Acc:660]	-0.557393	0.00051707	0.00502584
ENSG00000139266	83	110	105	52	77	77	2018-03-09	membrane-associated ring finger (C3HC4) 9 [Source:HGNC Symbol;Acc:25139]	-0.557277	0.00263781	0.0195657
ENSG00000079257	296	269	298	200	212	208	LXN	latexin [Source:HGNC Symbol;Acc:13347]	-0.557233	0.00704552	0.0433486
ENSG00000123178	171	151	182	130	96	123	SPRYD7	SPRY domain containing 7 [Source:HGNC Symbol;Acc:14297]	-0.556645	0.00656753	0.0408723
ENSG00000236515	417	384	391	229	297	285	ZBTB9	zinc finger and BTB domain containing 9 [Source:HGNC Symbol;Acc:28323]	-0.555732	1.35e-07	2.79e-06
ENSG00000242616	398	358	487	298	335	284	GNG10	guanine nucleotide binding protein (G protein), gamma 10 [Source:HGNC Symbol;Acc:4402]	-0.555722	0.00239243	0.0180854
ENSG00000170365	204	236	241	149	159	152	SMAD1	SMAD family member 1 [Source:HGNC Symbol;Acc:6767]	-0.555391	7.59e-06	0.000119969
ENSG00000106100	228	221	252	147	144	171	NOD1	nucleotide-binding oligomerization domain containing 1 [Source:HGNC Symbol;Acc:16390]	-0.555334	3.96e-06	6.58e-05
ENSG00000187994	142	127	150	92	109	87	RINL	Ras and Rab interactor-like [Source:HGNC Symbol;Acc:24795]	-0.55485	0.00123974	0.0104847
ENSG00000231345	233	224	265	154	155	174			-0.553475	9.57e-05	0.00115495
ENSG00000182986	494	415	449	352	300	285	ZNF320	zinc finger protein 320 [Source:HGNC Symbol;Acc:13842]	-0.55306	4.73e-05	0.000615353
ENSG00000136940	624	602	701	440	454	443	PDCL	phosducin-like [Source:HGNC Symbol;Acc:8770]	-0.551075	1.61e-09	4.26e-08
ENSG00000111666	313	309	408	262	284	213	CHPT1	choline phosphotransferase 1 [Source:HGNC Symbol;Acc:17852]	-0.550889	0.00384743	0.0265909
ENSG00000256018	4222	3940	4095	2371	2939	2940	HIST1H3G	histone cluster 1, H3g [Source:HGNC Symbol;Acc:4772]	-0.550521	0.000150259	0.0017189
ENSG00000105808	96	93	133	77	64	74	RASA4	RAS p21 protein activator 4 [Source:HGNC Symbol;Acc:23181]	-0.549842	0.00687451	0.0425035
ENSG00000181555	981	909	933	634	671	635	SETD2	SET domain containing 2 [Source:HGNC Symbol;Acc:18420]	-0.549827	0.00117454	0.0100251
ENSG00000178104	802	770	729	515	530	516	PDE4DIP	phosphodiesterase 4D interacting protein [Source:HGNC Symbol;Acc:15580]	-0.54978	1.8e-10	5.21e-09
[truncated: 2,366 more rows]
